# Supplementary material for: Catalytic enantioselective synthesis of cyclopropyl α-amino carboxylates and phosphonates
Source: Royal Society of Chemistry journal article supplement (doi:10.1039/d4qo01139b), 2024-01-01
Supplement: d4qo01139b1.pdf [file d4qo01139b1.pdf]

## Content

|     |                                                        |     |
|-----|--------------------------------------------------------|-----|
| 1.  | General information .....                              | 2   |
| 2.  | Optimization of the reactions .....                    | 3   |
| a.  | $\alpha$ -amino carboxylates .....                     | 3   |
| b.  | $\alpha$ -amino phosphonates .....                     | 6   |
| 3.  | General procedure for cyclopropanation .....           | 9   |
| 4.  | Characterization of new compounds .....                | 10  |
| 5.  | Post-functionalization reactions .....                 | 26  |
| 6.  | NMR spectra .....                                      | 29  |
| 7.  | HPLC chromatograms .....                               | 83  |
| 8.  | X-ray crystallographic data of 1 (CCDC 2177765) .....  | 123 |
| 9.  | X-ray crystallographic data of 27 (CCDC 2350765) ..... | 131 |
| 10. | X-ray crystallographic data of 28 (CCDC 2350766) ..... | 144 |
| 11. | References .....                                       | 160 |

## 1. General information

All manipulations were carried out using flame dried glassware and magnetic stirring under Argon atmosphere.  $\text{Rh}_2(\text{S}-(\text{TCPTAD}))_4$ ,  $\text{Rh}_2(\text{R}-(\text{BTPCB}))_4$ ,  $\text{Rh}_2(\text{esp})_2$  and  $\text{Rh}_2(\text{R}-(\text{p-PhTPCP}))_4$  were purchased from Sigma Aldrich. Tetrahydrofuran (THF) and toluene (tol.) were distilled over sodium and benzophenone and dichloromethane ( $\text{CH}_2\text{Cl}_2$ ) and chloroform ( $\text{CHCl}_3$ ) were distilled over calcium hydride. Other solvents were purchased over molecular sieves and commercially available reagents were purchased from standard chemical suppliers (Sigma Aldrich and Fisher Scientific) and used as received without further purification. Column chromatographies were carried out using silica gel (40-63  $\mu\text{m}$ ) supplied by VWR and analytical thin layer chromatographies (TLC) performed on pre-coated silica gel aluminum plates (60 F254 from Merck) were visualized by UV light (254 nm) and/or stained with ninhydrin.

$^1\text{H}$  (300 MHz),  $^{13}\text{C}$  (75 MHz) and  $^{19}\text{F}$  (282 MHz) NMR spectra were recorded on a Bruker Avance 300 in  $\text{CDCl}_3$  unless otherwise noted.  $^1\text{H}$  (400 MHz),  $^{13}\text{C}$  (101 MHz),  $^{19}\text{F}$  (376 MHz) and  $^{31}\text{P}$  (162 MHz) NMR spectra were recorded on a Bruker Ascend Evo 400 in  $\text{CDCl}_3$  unless otherwise noted. Chemical shifts  $\delta$  are quoted in ppm relatively to the residual solvent peak for  $\text{CDCl}_3$  ( $\delta_{\text{H}} = 7.26$  ppm and  $\delta_{\text{C}} = 77.16$  ppm). Coupling constants  $J$  are expressed in Hertz (Hz) and the following abbreviations for multiplicities are used: s for singlet, br s for broad singlet, d for doublet, t for triplet, q for quartet, dd for doublet of doublets and m for multiplet. HPLC analysis were performed on a ThermoFisher UHPLC system Ultimate RSLC with a PDA detector and columns with chiral stationary phase from Daicel (250 mm x 4.6 mm, 5  $\mu\text{m}$  particle size) at 20 °C. Optical rotations were recorded on a PerkinElmer Polarimeter 341 at 20 °C in  $\text{CHCl}_3$  or  $\text{CH}_2\text{Cl}_2$ . Melting points were recorded on a Stuart SMP3 melting point apparatus. High-resolution mass spectra (HRMS) were recorded on Waters LCT Premier. IR spectra were recorded on a PerkinElmer Spectrum 100.

Methyl-2-(di(*tert*-butoxycarbonyl)amino)but-2-enoate<sup>1</sup> (**I**) was synthesized following reported procedures. Diazo compounds were synthesized according to the literature.<sup>2-7</sup>  $\text{Rh}_2(\text{S}-(\text{p-PhTPCP}))_4$  was synthesized following reported procedures.<sup>8</sup>

Diethyl [1-(*tert*butoxycarbonylamino)ethen-1-yl]phosphonate (**II**) and Diethyl [1-(benzyloxycarbonylamino)ethen-1-yl]phosphonate (**III**) were synthesized according to the literature.<sup>9</sup>

## 2. Optimization of the reactions

### a. $\alpha$ -amino carboxylates

Methyl-2-(di(*tert*-butoxycarbonyl)amino)but-2-enoate **I** and *tert*-butyl 2-cyano-2-diazoacetate were initially utilized to find optimal conditions in terms of catalyst, solvent, temperature, concentration, and reaction stoichiometry (Table S1-5).

**Table S1.** Catalyst evaluation

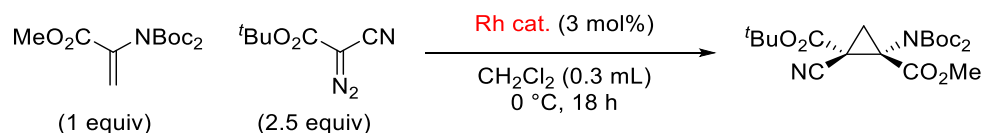

| Entry | Rh cat.                                          | NMR yield (%) | ee (%) |
|-------|--------------------------------------------------|---------------|--------|
| 1     | Rh <sub>2</sub> ( <i>R</i> -BTPCP) <sub>4</sub>  | 93            | 94     |
| 2     | Rh <sub>2</sub> ( <i>S</i> -TCPTAD) <sub>4</sub> | 70            | 52     |
| 3     | Rh <sub>2</sub> ( <i>S</i> -DOSP) <sub>4</sub>   | /             | /      |
| 4     | Rh <sub>2</sub> ( <i>S</i> -IBAZ) <sub>4</sub>   | 32            | /      |
| 5     | Rh <sub>2</sub> ( <i>S</i> -TCPTTL) <sub>4</sub> | <5            | /      |

**Table S2.** Solvent evaluation

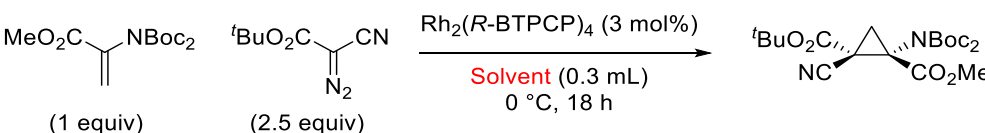

| Entry | Solvent                         | NMR yield (%) | ee (%) |
|-------|---------------------------------|---------------|--------|
| 1     | CH <sub>2</sub> Cl <sub>2</sub> | 93            | 94     |
| 2     | Toluene                         | /             | /      |
| 3     | MeCN                            | 37            | /      |
| 4     | Pentane                         | 63            | 90     |
| 5     | Et <sub>2</sub> O               | <5            | /      |
| 6     | CHCl <sub>3</sub>               | 41            | /      |
| 7     | Heptane                         | 83            | 92     |

**Table S3.** Temperature evaluation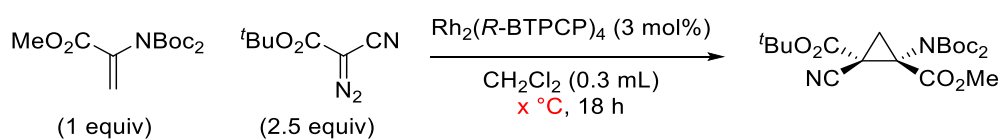

| Entry | T ( $^\circ\text{C}$ ) | NMR yield (%) | ee (%) |
|-------|------------------------|---------------|--------|
| 1     | -20                    | 36            | /      |
| 2     | 0                      | 93            | 94     |
| 3     | 25                     | 96            | 95     |

**Table S4.** Concentration evaluation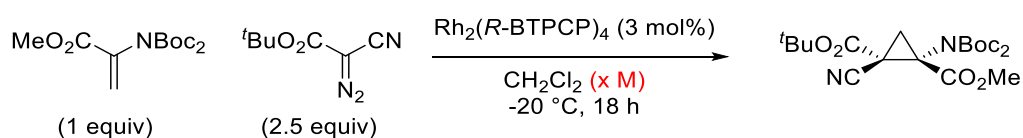

| Entry | Alkene (M) | Diazo (M) | NMR yield (%) | ee (%) |
|-------|------------|-----------|---------------|--------|
| 1     | 0.17       | 0.42      | 26            | /      |
| 2     | 0.33       | 0.83      | 36            | /      |
| 3     | 0.66       | 1.67      | 14            | /      |

**Table S5.** Reaction stoichiometry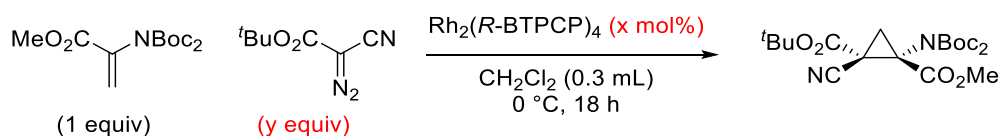

| Entry | x;y     | NMR yield (%) | ee (%) |
|-------|---------|---------------|--------|
| 1     | 3;2.5   | 93            | 94     |
| 2     | 2;2.5   | 94            | 96     |
| 3     | 1.5;2.5 | 93            | 94     |
| 4     | 1;2.5   | 83            | /      |
| 5     | 3;2.0   | 84            | /      |
| 6     | 3;1.5   | 69            | /      |

**Table S6.** Unsuccessful partners in the cyclopropanation reaction

**Alkenes**

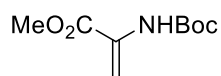

**Diazo reagents**

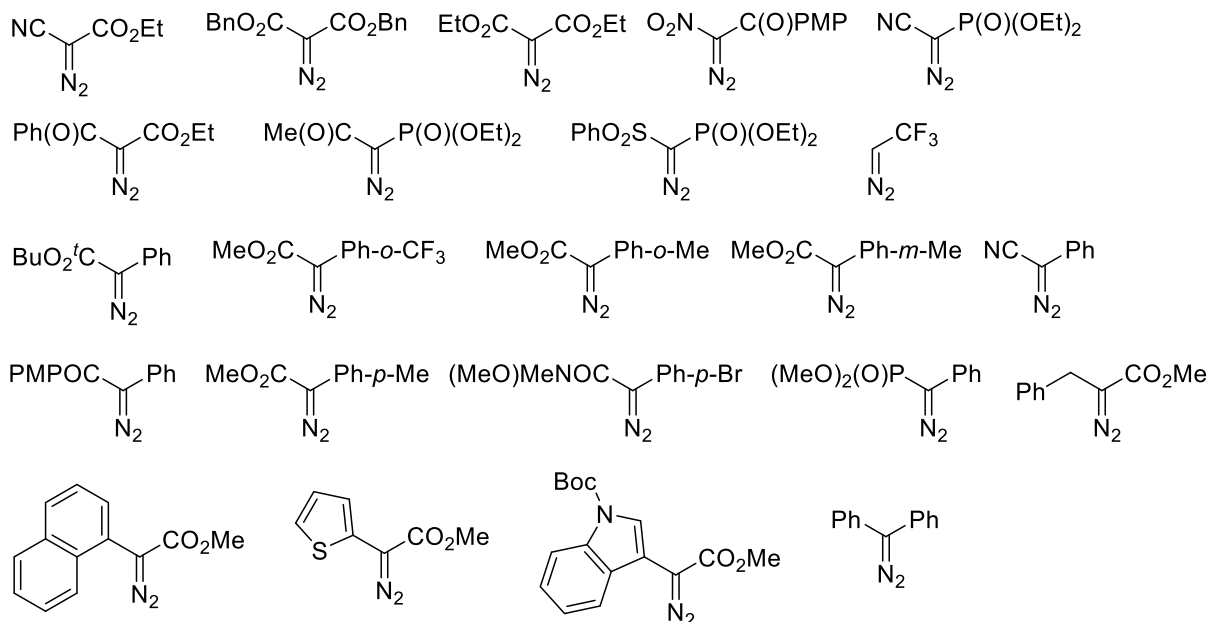

## b. $\alpha$ -amino phosphonates

Diethyl [1-(tertbutoxycarbonylamino)ethen-1-yl]phosphonate (**II**) and methyl 2-diazo-2-phenylacetate were initially utilized to find optimal conditions in terms of catalyst, solvent, temperature, concentration, and reaction stoichiometry (Table S6-11).

**Table S7.** Catalyst evaluation

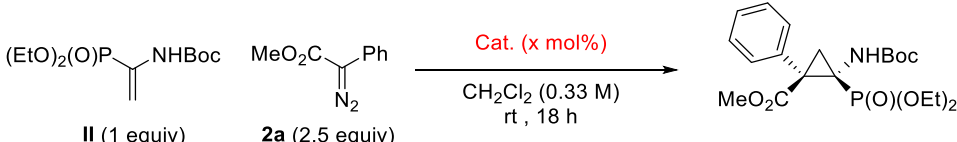

| Entry | Cat. (mol%)                                                      | Conv (%) | Yield. % <sup>a</sup> ( ) <sup>d</sup> | dr <sup>b</sup> | ee <sup>c</sup> |
|-------|------------------------------------------------------------------|----------|----------------------------------------|-----------------|-----------------|
| 1     | Rh <sub>2</sub> ( <i>R</i> -BTPCP) <sub>4</sub> (2)              | 92       | 57 (34)                                | 88:12           | 26              |
| 2     | Rh <sub>2</sub> ( <i>R</i> - <i>p</i> -Ph-TPCP) <sub>4</sub> (2) | 89       | 67 (63)                                | 99:1            | 85              |
| 3     | Rh <sub>2</sub> ( <i>S</i> -PTTL) <sub>4</sub> (2)               | 55       | 27 (22)                                | 87:13           | 8               |
| 4     | Rh <sub>2</sub> ( <i>S</i> - <i>tert</i> -PTTL) <sub>4</sub> (2) | 84       | 26 (30)                                | 79:21           | 26              |
| 5     | Rh <sub>2</sub> ( <i>S</i> -TBPTTL) <sub>4</sub> (2)             | 58       | 20                                     | 80:20           | 80              |
| 6     | Rh <sub>2</sub> ( <i>S</i> -TCPTTL) <sub>4</sub> (2)             | 97       | 48 (36)                                | nd              | 71              |
| 7     | Rh <sub>2</sub> ( <i>R</i> -PTAD) <sub>4</sub> (2)               | 72       | 53                                     | 89:11           | 30              |
| 8     | Rh <sub>2</sub> ( <i>S</i> -TCPTAD) <sub>4</sub> (2)             | 100      | 58 (55)                                | nd              | 75              |
| 9     | Ru(II)-( <i>S</i> )-Pheox                                        | 0        | -                                      | -               | -               |

(a): <sup>1</sup>H NMR yield (triphenylmethane as IS), (b): determined by <sup>31</sup>P NMR, (c): determined by HPLC, (d): isolated yield

**Table S8.** Solvent evaluation

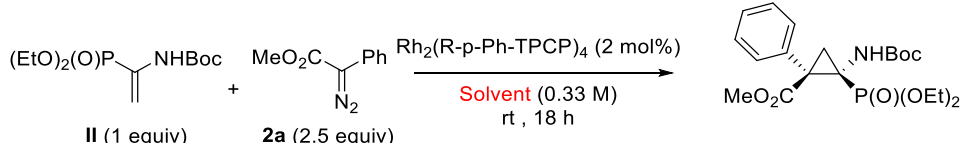

| Entry | Solvent           | Conv (%) | Yield. % <sup>a</sup> ( ) <sup>d</sup> | dr <sup>b</sup> | ee (%) <sup>c</sup> |
|-------|-------------------|----------|----------------------------------------|-----------------|---------------------|
| 1     | DCM               | 89       | 67 (63)                                | 99:1            | 85                  |
| 2     | CHCl <sub>3</sub> | 50       | 6                                      | 50:50           | nd                  |
| 3     | PhCH <sub>3</sub> | 58       | 26                                     | 83:17           | 70                  |
| 4     | DCE               | 82       | 56 (47)                                | 95:5            | 82                  |
| 5     | MeCN              | 52       | 30 (27)                                | 96:4            | 87                  |
| 6     | THF               | 0        | 0                                      | -               | -                   |
| 7     | MeOH              | 0        | 0                                      | -               | -                   |
| 8     | EtOAc             | 75       | 38 (34)                                | 88:12           | 80                  |
| 9     | Et <sub>2</sub> O | 60       | 28 (nc)                                | 90:10           | 73                  |

(a): <sup>1</sup>H NMR yield (triphenylmethane as IS), (b): determined by <sup>31</sup>P NMR, (c): determined by HPLC, (d): isolated yield

**Table S9.** Temperature evaluation

| Entry          | T °C | Conv (%) <sup>a</sup> | Yield. % <sup>a</sup> (e) | dr <sup>b</sup> | ee (%) <sup>c</sup> |
|----------------|------|-----------------------|---------------------------|-----------------|---------------------|
| 1              | rt   | 89                    | 67 (63)                   | 99:1            | 85                  |
| 2              | 0    | 94                    | 56 (48)                   | n.d             | 84                  |
| 3              | -10  | 88                    | 56 (56)                   | 97:3            | 87                  |
| 4 <sup>d</sup> | -20  | 89                    | 60 (55)                   | 96:4            | 86                  |
| 5 <sup>d</sup> | -30  | 83                    | 46 (45)                   | 92:8            | 86                  |

(a): <sup>1</sup>H NMR yield (triphenylmethane as IS), (b) : determined by <sup>31</sup>P NMR, (c): determined by HPLC, (d): addition in 5 h, (e) : isolated yield

**Table S10.** Concentration evaluation

| Entry | Conc (M) | Conv (%) <sup>a</sup> | Yield. % <sup>a</sup> (b) | dr <sup>c</sup> | ee <sup>d</sup> |
|-------|----------|-----------------------|---------------------------|-----------------|-----------------|
| 1     | 0.33     | 89                    | 67 (63)                   | 99:1            | 85              |
| 2     | 0.2      | 89                    | 51 (42)                   | 93:7            | 74              |

(a): <sup>1</sup>H NMR yield (triphenylmethane), (b) : isolated yield, (c) : determined by <sup>31</sup>P NMR, (d): determined by HPLC

**Table S11.** Diazo equivalent

| Entry | 2a (x eq) | Conv (%) <sup>a</sup> | Yield. % <sup>a</sup> (d) | dr <sup>b</sup> | ee <sup>c</sup> |
|-------|-----------|-----------------------|---------------------------|-----------------|-----------------|
| 1     | 2.5       | 89                    | 67 (63)                   | 99:1            | 85              |
| 2     | 3         | 94                    | 73 (66)                   | 98:2            | 83              |
| 3     | 3.5       | 100                   | 84 (75)                   | 98:2            | 84              |

(a): <sup>1</sup>H NMR yield (triphenylmethane), (b) : determined by <sup>31</sup>P NMR, (c): determined by HPLC, (d) : isolated yield

**Table S12.** Time and alkene evaluation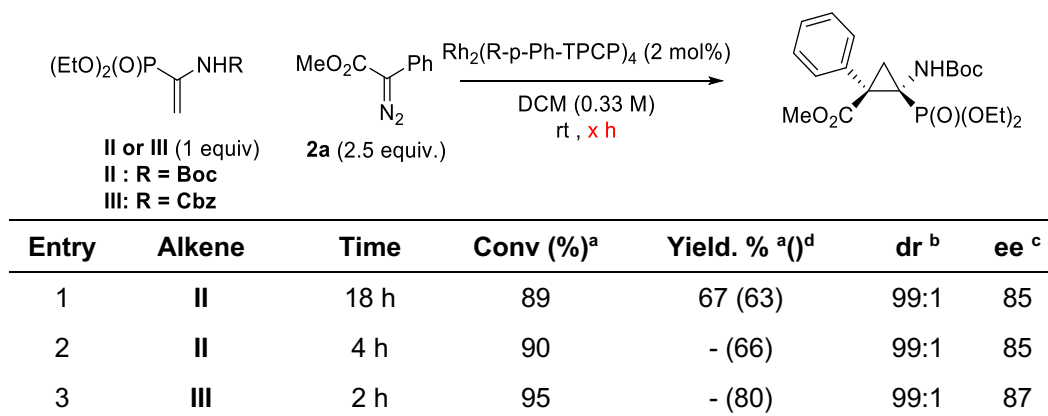

(a): <sup>1</sup>H NMR yield (triphenylmethane), (b) : determined by <sup>31</sup>P NMR,  
(c): determined by HPLC, (d) : isolated yield



### 3. General procedure for cyclopropanation

#### General procedure A for the synthesis of racemic $\alpha$ -amino carboxylates.

In a dry microwave tube, the alkene (100.0  $\mu\text{mol}$ ) and  $\text{Rh}(\text{esp})_2$  (3.0  $\mu\text{mol}$ ) were dissolved in  $\text{CH}_2\text{Cl}_2$  (150.0  $\mu\text{L}$ ) under argon. The tube was inserted in an ice bath. The diazo (250.0  $\mu\text{mol}$ ) was then added as a solution in  $\text{CH}_2\text{Cl}_2$  (150.0  $\mu\text{L}$ ) over 1 h. The reaction mixture was stirred at 25  $^\circ\text{C}$  for 18 h. An aliquot was analyzed by  $^1\text{H}$  NMR. The mixture was concentrated and purified by column chromatography on silica gel (Pentane: $\text{Et}_2\text{O}$ ) to give the pure product.

#### General procedure B for the synthesis of $\alpha$ -amino carboxylates.

In a dry microwave tube, the alkene (100.0  $\mu\text{mol}$ ) and  $\text{Rh}_2(\text{R-BTPCP})_4$  (2.0  $\mu\text{mol}$ ) were dissolved in  $\text{CH}_2\text{Cl}_2$  (150.0  $\mu\text{L}$ ) under argon. The tube was inserted in a bath at 0  $^\circ\text{C}$ . The diazo (250.0  $\mu\text{mol}$ ) was then added as a solution in  $\text{CH}_2\text{Cl}_2$  (150.0  $\mu\text{L}$ ) over 5 h and stirred at 0  $^\circ\text{C}$  for 18 h. An aliquot was analyzed by  $^1\text{H}$  NMR. The mixture was concentrated and purified by column chromatography on silica gel (Pentane: $\text{Et}_2\text{O}$ ) to give the pure product.

#### General procedure C for the synthesis of racemic $\alpha$ -amino phosphonates.

In a dry microwave tube, the alkene (100.0  $\mu\text{mol}$ ) and  $\text{Rh}(\text{esp})_2$  (2.0  $\mu\text{mol}$ ) were dissolved in  $\text{CH}_2\text{Cl}_2$  (150.0  $\mu\text{L}$ ) under argon. The diazo (250.0  $\mu\text{mol}$ ) was then added as a solution in  $\text{CH}_2\text{Cl}_2$  (150.0  $\mu\text{L}$ ) over 10 minutes. The reaction mixture was stirred at 25  $^\circ\text{C}$  for 2 h. An aliquot was analyzed by  $^1\text{H}$  NMR. The mixture was concentrated and purified by column chromatography on silica gel (Petroleum ether: $\text{EtOAc}$ ) to give the pure product.

#### General procedure D for the synthesis of enantiopure $\alpha$ -amino phosphonates.

In a dry microwave tube, the alkene (100.0  $\mu\text{mol}$ ) and  $\text{Rh}_2(\text{R-p-PhTPCP})_4$  (2.0  $\mu\text{mol}$ ) were dissolved in  $\text{CH}_2\text{Cl}_2$  (150.0  $\mu\text{L}$ ) under argon. The diazo (250.0  $\mu\text{mol}$ ) was then added as a solution in  $\text{CH}_2\text{Cl}_2$  (150.0  $\mu\text{L}$ ) over 30 minutes and stirred at 25  $^\circ\text{C}$  for 1h30. An aliquot was analyzed by  $^1\text{H}$  NMR. The mixture was concentrated and purified by column chromatography on silica gel (Petroleum ether: $\text{EtOAc}$ ) to give the pure product.

#### 4. Characterization of new compounds

**Compound 1** : 2-(tert-butyl 1-methyl (1*S*,2*R*)-1-(bis(tert-butoxycarbonyl)amino)-2-cyanocyclopropane-1,2-dicarboxylate

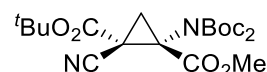

Compound **1** was prepared according to the general procedure B and obtained as a pale orange solid in 92% yield, 99:1 d.r., 98:2 e.r..  $^1\text{H NMR}$  (300 MHz,  $\text{CDCl}_3$ )  $\delta$  3.83 (s, 3H), 2.64 (d,  $J = 6.8$  Hz, 1H), 2.30 (d,  $J = 6.8$  Hz, 1H), 1.50 (s, 18H), 1.48 (s, 9H).  $^{13}\text{C NMR}$  (75 MHz,  $\text{CDCl}_3$ )  $\delta$  166.66 (s, 1C), 161.53 (s, 1C), 151.41 (s, 1C), 150.72 (s, 1C), 114.96 (s, 1C), 85.01 (s, 1C), 84.25 (s, 1C), 83.98 (s, 1C), 53.72 (s, 1C), 50.26 (s, 1C), 32.28 (s, 1C), 28.74 (s, 1C), 28.10 (s, 3C), 27.99 (s, 3C), 27.83 (s, 3C). **HR-MS** (APCI)  $m/z$  calcd for  $\text{C}_{21}\text{H}_{31}\text{N}_2\text{O}_8$   $[\text{M}-\text{H}]^-$  439.2080, found 439.2081. **IR** ( $\text{cm}^{-1}$ ) 2989, 2934, 2848, 2259, 1761, 1742, 1721, 1459, 1396, 1368, 1274, 1251, 1145, 1117, 963. **HPLC** Daicel Chiralpak IC-3, 150 mm,  $\varnothing$  4.6 mm, Heptane/iso-propanol = 90/10, 1.0 mL/min,  $\lambda = 220$  nm,  $t_{\text{major}} = 17.23$  min,  $t_{\text{minor}} = 14.12$  min.  $[\alpha]_{\text{D}}^{20} -2.1$  (c 1.00,  $\text{CHCl}_3$ ). **MP** 130-132 °C.

**Compound 2** : methyl (1*S*,2*R*)-1-(bis(tert-butoxycarbonyl)amino)-2-cyano-2-(4-methoxybenzoyl)cyclopropane-1-carboxylate

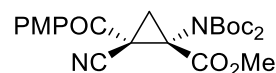

Compound **2** was prepared according to the general procedure B and obtained as a colorless oil in 20% yield, 99:1 d.r., 93.5:6.5 e.r..  $^1\text{H NMR}$  (300 MHz,  $\text{CDCl}_3$ )  $\delta$  8.36 – 7.77 (m, 2H), 7.04 – 6.74 (m, 2H), 3.89 (s, 3H), 3.87 (s, 3H), 2.78 (d,  $J = 6.3$  Hz, 1H), 2.60 (d,  $J = 6.3$  Hz, 1H), 1.50 (s, 9H), 1.25 (s, 9H).  $^{13}\text{C NMR}$  (75 MHz,  $\text{CDCl}_3$ )  $\delta$  184.97 (s, 1C), 166.61 (s, 1C), 163.77 (s, 1C), 151.63 (s, 2C), 132.95 (s, 2C), 127.99 (s, 1C), 117.65 (s, 1C), 113.06 (s, 2C), 83.93 (s, 2C), 55.50 (s, 1C), 53.59 (s, 1C), 52.14 (s, 1C), 33.47 (s, 1C), 28.92 (s, 1C), 27.70 (s, 6C). **HR-MS** (APCI)  $m/z$  calcd for  $\text{C}_{24}\text{H}_{30}\text{N}_2\text{O}_8$   $[\text{M}]$  474.2002, found 474.2007. **IR** ( $\text{cm}^{-1}$ ) 2982, 2919, 2850, 2244, 1743, 1712, 1601, 1512, 1366, 1249, 1171, 1117, 1022, 974. **HPLC** Daicel Chiralpak IC-3, 150 mm,  $\varnothing$  4.6 mm, Heptane/iso-propanol = 70/30, 1.0 mL/min,  $\lambda = 220$  nm,  $t_{\text{major}} = 7.11$  min,  $t_{\text{minor}} = 9.25$  min.  $[\alpha]_{\text{D}}^{20} -12.6$  (c 1.00,  $\text{CHCl}_3$ ).

**Compound 3** : methyl (1*S*,2*R*)-1-(bis(tert-butoxycarbonyl)amino)-2-cyano-2-(methoxy(methyl)carbamoyl)cyclopropane-1-carboxylate

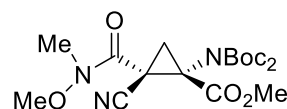

Compound **3** was prepared according to the general procedure B and obtained as a colorless oil in 37% yield, 99:1 d.r., 96:4 e.r..  $^1\text{H NMR}$  (300 MHz,  $\text{CDCl}_3$ )  $\delta$  3.85 (s, 3H), 3.83 (s, 3H), 3.22 (s, 3H), 2.59 (d,  $J = 6.5$  Hz, 1H), 2.55 (d,  $J = 6.5$  Hz, 1H), 1.48 (s, 18H).  $^{13}\text{C NMR}$  (75 MHz,  $\text{CDCl}_3$ )  $\delta$  166.60 (s, 1C), 151.66 (s, 2C), 115.83 (s, 1C), 83.82 (s, 2C), 61.20 (s, 1C), 53.64 (s, 1C), 50.31 (s, 1C), 28.77 (s, 1C), 28.61 (s, 1C), 28.03 (s, 6C),  $\text{CH}_3$  and  $\text{CON}$  not visible due to broad signals, see HSQC. **HR-MS** (APCI)  $m/z$  calcd for  $\text{C}_{19}\text{H}_{30}\text{N}_3\text{O}_8$   $[\text{M}+\text{H}]^+$  428.2033, found 428.2027. **IR** ( $\text{cm}^{-1}$ ) 3116, 2929, 2854, 2244, 1791, 1739, 1714, 1661, 1438,

1366, 1299, 1255, 1213, 1153, 1090, 937. **HPLC** Daicel Chiralpak IC-3, 150 mm, Ø 4.6 mm, Heptane/iso-propanol = 70/30, 1.0 mL/min,  $\lambda = 220$  nm,  $t_{\text{major}} = 8.39$  min,  $t_{\text{minor}} = 13.83$  min.  $[\alpha]_{\text{D}}^{20} -27.3$  (c 1.00,  $\text{CHCl}_3$ ).

**Compound 4** : methyl (1*S*,2*R*)-1-(bis(tert-butoxycarbonyl)amino)-2-(2-ethoxy-2-oxoacetyl)cyclopropane-1-carboxylate

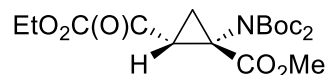

Compound **4** was prepared according to the general procedure B and obtained as a colorless oil in 22% yield, 99:1 d.r., 72:28 e.r..  $^1\text{H NMR}$  (300 MHz,  $\text{CDCl}_3$ )  $\delta$  4.48 – 4.22 (m, 2H), 3.96 (t,  $J = 8.3$  Hz, 1H), 3.74 (s, 3H), 2.14 (dd,  $J = 8.6, 5.7$  Hz, 1H), 1.98 (dd,  $J = 8.0, 5.7$  Hz, 1H), 1.51 (s, 9H), 1.42 (s, 9H), 1.36 (t,  $J = 7.1$  Hz, 3H).  $^{13}\text{C NMR}$  (75 MHz,  $\text{CDCl}_3$ )  $\delta$  185.88 (s, 1C), 169.90 (s, 1C), 160.68 (s, 1C), 152.89 (s, 1C), 152.42 (s, 1C), 83.79 (s, 1C), 83.44 (s, 1C), 62.68 (s, 1C), 53.30 (s, 1C), 47.57 (s, 1C), 33.91 (s, 1C), 28.11 (s, 3C), 27.99 (s, 3C), 23.91 (s, 1C), 14.12 (s, 1C). **HR-MS** (ESI)  $m/z$  calcd for  $\text{C}_{19}\text{H}_{29}\text{NO}_9\text{K}$   $[\text{M}+\text{K}]^+$  454.1479, found 454.1503. **IR** ( $\text{cm}^{-1}$ ) 2982, 2936, 1738, 1721, 1706, 1439, 1366, 1272, 1248, 1155, 1116, 1087, 1058, 982. **HPLC** Daicel Chiralpak IB-3, 150 mm, Ø 4.6 mm, Heptane/iso-propanol = 95/5, 1.0 mL/min,  $\lambda = 220$  nm,  $t_{\text{major}} = 6.24$  min,  $t_{\text{minor}} = 5.71$  min.  $[\alpha]_{\text{D}}^{20} +3.9$  (c 1.00,  $\text{CHCl}_3$ ).

**Compound 5** : dimethyl (1*S*,2*S*)-1-(bis(tert-butoxycarbonyl)amino)-2-phenylcyclopropane-1,2-dicarboxylate

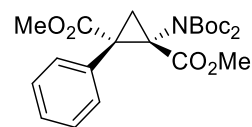

Compound **5** was prepared according to the general procedure B and obtained as a colorless oil in 78% yield, 99:1 d.r., 99:1 e.r..  $^1\text{H NMR}$  (300 MHz,  $\text{CDCl}_3$ )  $\delta$  7.47 (d,  $J = 6.4$  Hz, 2H), 7.38 – 7.17 (m, 3H), 3.59 (s, 3H), 3.27 (s, 3H), 2.57 (d,  $J = 6.0$  Hz, 1H), 2.25 (d,  $J = 6.0$  Hz, 1H), 1.56 (s, 9H), 1.51 (s, 9H).  $^{13}\text{C NMR}$  (75 MHz,  $\text{CDCl}_3$ )  $\delta$  169.84 (s, 1C), 168.30 (s, 1C), 152.98 (s, 1C), 152.60 (s, 1C), 135.83 (s, 1C), 130.28 (s, 2C), 128.02 (s, 2C), 127.72 (s, 1C), 83.01 (s, 2C), 53.10 (s, 1C), 52.47 (s, 1C), 50.44 (s, 1C), 45.10 (s, 1C), 28.18 (s, 3C), 28.15 (s, 3C), 26.95 (s, 1C). **HR-MS** (ESI)  $m/z$  calcd for  $\text{C}_{23}\text{H}_{31}\text{NO}_8\text{K}$   $[\text{M}+\text{K}]^+$  488.1687, found 488.1685. **IR** ( $\text{cm}^{-1}$ ) 2982, 2952, 1730, 1708, 1435, 1366, 1274, 1228, 1164, 1116, 1065, 1017, 956. **HPLC** Daicel Chiralpak IE-3, 150 mm, Ø 4.6 mm, Heptane/iso-propanol = 95/5, 1.0 mL/min,  $\lambda = 220$  nm,  $t_{\text{major}} = 11.92$  min,  $t_{\text{minor}} = 13.73$  min.  $[\alpha]_{\text{D}}^{20} -19.9$  (c 1.00,  $\text{CHCl}_3$ ).

**Compound 6:** dimethyl (1S,2S)-1-(bis(tert-butoxycarbonyl)amino)-2-(4-fluorophenyl)cyclopropane-1,2-dicarboxylate

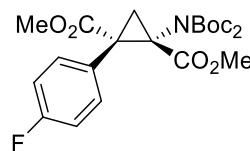

Compound **6** was prepared according to the general procedure B and obtained as a colorless oil in 77% yield, 99:1 d.r., 98:2 e.r..  $^1\text{H NMR}$  (300 MHz,  $\text{CDCl}_3$ )  $\delta$  7.45 (s, 2H), 6.98 (t,  $J = 8.8$  Hz, 2H), 3.59 (s, 3H), 3.32 (s, 3H), 2.54 (d,  $J = 6.1$  Hz, 1H), 2.25 (d,  $J = 6.1$  Hz, 1H), 1.55 (s, 9H), 1.51 (s, 9H).  $^{13}\text{C NMR}$  (75 MHz,  $\text{CDCl}_3$ )  $\delta$  169.64 (s, 1C), 168.18 (s, 1C), 162.28 (d,  $J = 246.2$  Hz, 1C), 153.05 (s, 1C), 152.49 (s, 1C), 131.98 (d,  $J = 8.1$  Hz, 2C), 131.62 (d,  $J = 3.3$  Hz, 1C), 114.97 (d,  $J = 21.5$  Hz, 2C), 83.09 (s, 2C), 53.12 (s, 1C), 52.61 (s, 1C), 50.45 (s, 1C), 44.35 (s, 1C), 28.16 (s, 6C), 27.02 (s, 1C).  $^{19}\text{F NMR}$  (282 MHz,  $\text{CDCl}_3$ )  $\delta$  -114.34 (s). **HR-MS** (ESI)  $m/z$  calcd for  $\text{C}_{23}\text{H}_{30}\text{NO}_8\text{NaF}$   $[\text{M}+\text{Na}]^+$  490.1853, found 490.1845. **IR** ( $\text{cm}^{-1}$ ) 2985, 1739, 1725, 1707, 1607, 1515, 1438, 1393, 1364, 1324, 1291, 1275, 1226, 1161, 1125, 1080, 1067, 1022, 968. **HPLC** Daicel Chiralpak IE-3, 150 mm,  $\varnothing$  4.6 mm, Heptane/iso-propanol = 95/5, 1.0 mL/min,  $\lambda = 220$  nm,  $t_{\text{major}} = 7.96$  min,  $t_{\text{minor}} = 8.49$  min.  $[\alpha]_{\text{D}}^{20}$  -27.6 (c 1.00,  $\text{CHCl}_3$ ).

**Compound 7:** dimethyl (1S,2S)-1-(bis(tert-butoxycarbonyl)amino)-2-(4-chlorophenyl)cyclopropane-1,2-dicarboxylate

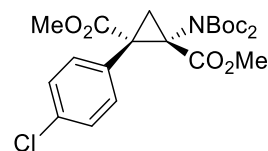

Compound **7** was prepared according to the general procedure B and obtained as a colorless solid in 97% yield, 99:1 d.r., 97:3 e.r..  $^1\text{H NMR}$  (300 MHz,  $\text{CDCl}_3$ )  $\delta$  7.41 (d,  $J = 8.7$  Hz, 2H), 7.26 (d,  $J = 8.8$  Hz, 2H), 3.59 (s, 3H), 3.33 (s, 3H), 2.53 (d,  $J = 6.1$  Hz, 1H), 2.25 (d,  $J = 6.1$  Hz, 1H), 1.54 (s, 9H), 1.50 (s, 9H).  $^{13}\text{C NMR}$  (75 MHz,  $\text{CDCl}_3$ )  $\delta$  169.40 (s, 1C), 168.10 (s, 1C), 153.03 (s, 1C), 152.43 (s, 1C), 134.38 (s, 1C), 133.59 (s, 1C), 131.69 (s, 1C), 129.37 (s, 1C), 128.24 (s, 2C), 83.12 (s, 2C), 53.13 (s, 1C), 52.65 (s, 1C), 50.38 (s, 1C), 44.44 (s, 1C), 28.14 (s, 6C), 27.00 (s, 1C). **HR-MS** (ESI)  $m/z$  calcd for  $\text{C}_{23}\text{H}_{30}\text{NO}_8\text{NaCl}$   $[\text{M}+\text{Na}]^+$  506.1558, found 506.1552. **IR** ( $\text{cm}^{-1}$ ) 2981, 2953, 1731, 1707, 1494, 1435, 1366, 1275, 1227, 1164, 1116, 1091, 1013, 956. **HPLC** Daicel Chiralpak IE-3, 150 mm,  $\varnothing$  4.6 mm, Heptane/iso-propanol = 95/5, 1.0 mL/min,  $\lambda = 220$  nm,  $t_{\text{major}} = 9.58$  min,  $t_{\text{minor}} = 10.44$  min.  $[\alpha]_{\text{D}}^{20}$  -44.4 (c 1.00,  $\text{CHCl}_3$ ).

**Compound 8:** 2-ethyl 1-methyl (1S,2S)-1-(4-bromophenyl)-2-(bis(tert-butoxycarbonyl)amino)cyclopropane-1,2-dicarboxylate

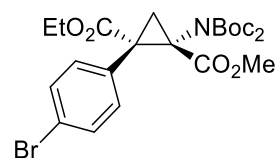

Compound **8** was prepared according to the general procedure B and obtained as a colorless oil in 85% yield, 99:1 d.r., 99.5:0.5 e.r..  $^1\text{H NMR}$  (300 MHz,  $\text{CDCl}_3$ )  $\delta$  7.41 (d,  $J = 8.9$  Hz, 2H), 7.35 (d,  $J = 8.4$  Hz, 2H), 4.04 (q,  $J = 7.1$  Hz, 2H), 3.33 (s, 3H), 2.53 (d,  $J = 6.2$  Hz, 1H), 2.24 (d,  $J = 6.2$  Hz, 1H), 1.54 (s, 9H), 1.51 (s, 9H), 1.16 (t,  $J = 7.1$  Hz, 3H).  $^{13}\text{C NMR}$  (75 MHz,  $\text{CDCl}_3$ )  $\delta$  168.67 (s, 1C), 168.16 (s, 1C), 152.93 (s, 1C), 152.57 (s, 1C), 135.05 (s, 1C),

132.05 (s, 1C), 131.10 (s, 2C), 129.20 (s, 1C), 121.75 (s, 1C), 83.09 (s, 2C), 62.05 (s, 1C), 52.63 (s, 1C), 50.26 (s, 1C), 44.72 (s, 1C), 28.18 (s, 3C), 28.13 (s, 3C), 26.58 (s, 1C), 14.00 (s, 1C). **HR-MS** (ESI)  $m/z$  calcd for  $C_{24}H_{32}NO_8K$   $[M+K]^+$  580.0948, found 580.0952. **IR** ( $cm^{-1}$ ) 2981, 2932, 1728, 1709, 1489, 1365, 1275, 1223, 1166, 1116, 1065, 1009, 912. **HPLC** Daicel Chiralpak IE-3, 150 mm,  $\varnothing$  4.6 mm, Heptane/iso-propanol = 90/10, 1.0 mL/min,  $\lambda$  = 220 nm,  $t_{major}$  = 6.97 min,  $t_{minor}$  = 8.48 min.  $[\alpha]_D^{20}$  -47.4 (c 1.00,  $CHCl_3$ ).

**Compound 9: dimethyl (1S,2S)-1-(bis(tert-butoxycarbonyl)amino)-2-(4-iodophenyl)cyclopropane-1,2-dicarboxylate**

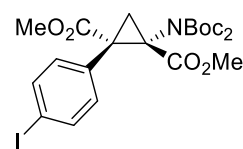

Compound **9** was prepared according to the general procedure B and obtained as a colorless solid in 96% yield, 99:1 d.r., 98:2 e.r..  **$^1H$  NMR** (300 MHz,  $CDCl_3$ )  $\delta$  7.62 (d,  $J$  = 8.6 Hz, 2H), 7.22 (d,  $J$  = 7.7 Hz, 2H), 3.59 (s, 3H), 3.34 (s, 3H), 2.52 (d,  $J$  = 6.1 Hz, 1H), 2.25 (d,  $J$  = 6.1 Hz, 1H), 1.54 (s, 9H), 1.51 (s, 9H).  **$^{13}C$  NMR** (75 MHz,  $CDCl_3$ )  $\delta$  169.28 (s, 1C), 168.08 (s, 1C), 153.00 (s, 1C), 152.42 (s, 1C), 138.30 (s, 1C), 137.16 (s, 2C), 135.59 (s, 1C), 132.28 (s, 1C), 129.43 (s, 1C), 83.13 (s, 2C), 53.15 (s, 1C), 52.67 (s, 1C), 50.31 (s, 1C), 44.63 (s, 1C), 28.14 (s, 6C), 26.94 (s, 1C). **HR-MS** (ESI)  $m/z$  calcd for  $C_{23}H_{30}NO_8NaI$   $[M+Na]^+$  598.0914, found 598.0888. **IR** ( $cm^{-1}$ ) 2977, 2951, 1731, 1695, 1484, 1436, 1363, 1241, 1221, 1158, 1120, 1080, 1005, 948. **HPLC** Daicel Chiralpak IE-3, 150 mm,  $\varnothing$  4.6 mm, Heptane/iso-propanol = 95/5, 1.0 mL/min,  $\lambda$  = 220 nm,  $t_{major}$  = 10.21 min,  $t_{minor}$  = 11.42 min.  $[\alpha]_D^{20}$  -40.0 (c 1.00,  $CHCl_3$ ).

**Compound 10: dimethyl (1S,2S)-1-(bis(tert-butoxycarbonyl)amino)-2-(4-(trifluoromethyl)phenyl)cyclopropane-1,2-dicarboxylate**

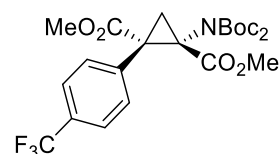

Compound **10** was prepared according to the general procedure B and obtained as a colorless oil in 52% yield, 99:1 d.r., 99.5:0.5 e.r..  $^1\text{H NMR}$  (300 MHz,  $\text{CDCl}_3$ )  $\delta$  7.64 – 7.52 (m, 4H), 3.60 (s, 3H), 3.30 (s, 3H), 2.58 (d,  $J = 6.2$  Hz, 1H), 2.30 (d,  $J = 6.2$  Hz, 1H), 1.55 (s, 9H), 1.51 (s, 9H).  $^{13}\text{C NMR}$  (75 MHz,  $\text{CDCl}_3$ )  $\delta$  169.09 (s, 1C), 168.00 (s, 1C), 153.06 (s, 1C), 152.39 (s, 1C), 139.92 (d,  $J = 1.3$  Hz, 1C), 130.75 (s, 2C), 129.82 (q,  $J = 32.3$  Hz, 1C), 124.94 (q,  $J = 3.7$  Hz, 2C), 124.28 (q,  $J = 272.1$  Hz, 1C), 122.48 (s, 1C), 83.23 (s, 2C), 53.18 (s, 1C), 52.61 (s, 1C), 50.32 (s, 1C), 44.69 (s, 1C), 28.14 (s, 6C), 27.00 (s, 1C).  $^{19}\text{F NMR}$  (282 MHz,  $\text{CDCl}_3$ )  $\delta$  -62.51 (s). **HR-MS** (ESI)  $m/z$  calcd for  $\text{C}_{24}\text{H}_{30}\text{NO}_8\text{F}_3\text{Na}$   $[\text{M}+\text{Na}]^+$  540.1821, found 540.1786. **IR** ( $\text{cm}^{-1}$ ) 2980, 2950, 1735, 1698, 1620, 1438, 1365, 1326, 1271, 1224, 1163, 1132, 1102, 1061, 1014, 949. **HPLC** Daicel Chiralpak IC-3, 150 mm,  $\text{O}$  4.6 mm, Heptane/iso-propanol = 90/10, 1.0 mL/min,  $\lambda = 220$  nm,  $t_{\text{major}} = 4.30$  min,  $t_{\text{minor}} = 8.41$  min.  $[\alpha]_{\text{D}}^{20}$  -29.6 ( $c$  1.00,  $\text{CHCl}_3$ ).

**Compound 11: 2-ethyl 1-methyl (1S,2S)-1-((tert-butoxycarbonyl)amino)-2-(4-nitrophenyl)cyclopropane-1,2-dicarboxylate**

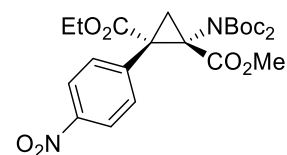

Compound **11** was prepared according to the general procedure B and obtained as a colorless oil in 24% yield, 99:1 d.r., 99.5:0.5 e.r..  $^1\text{H NMR}$  (300 MHz,  $\text{CDCl}_3$ )  $\delta$  8.17 (d,  $J = 8.9$  Hz, 2H), 7.68 (d,  $J = 7.6$  Hz, 2H), 4.05 (q,  $J = 7.1$  Hz, 2H), 3.36 (s, 3H), 2.59 (d,  $J = 6.3$  Hz, 1H), 2.34 (d,  $J = 6.3$  Hz, 1H), 1.55 (s, 9H), 1.52 (s, 9H), 1.15 (t,  $J = 7.1$  Hz, 3H).  $^{13}\text{C NMR}$  (75 MHz,  $\text{CDCl}_3$ )  $\delta$  168.00 (s, 1C), 167.96 (s, 1C), 153.07 (s, 1C), 152.36 (s, 1C), 147.41 (s, 1C), 143.52 (s, 2C), 131.41 (s, 1C), 123.18 (s, 2C), 83.37 (s, 1C), 83.31 (s, 1C), 62.34 (s, 1C), 52.85 (s, 1C), 50.28 (s, 1C), 44.80 (s, 1C), 28.18 (s, 3C), 28.15 (s, 3C), 26.98 (s, 1C), 13.97 (s, 1C). **HR-MS** (ESI)  $m/z$  calcd for  $\text{C}_{24}\text{H}_{32}\text{N}_2\text{O}_{10}\text{Na}$   $[\text{M}+\text{Na}]^+$  531.1955, found 531.1946. **IR** ( $\text{cm}^{-1}$ ) 2982, 2933, 1729, 1708, 1602, 1522, 1366, 1347, 1274, 1224, 1163, 1116, 1066, 1010, 969. **HPLC** Daicel Chiralpak IE-3, 150 mm,  $\text{O}$  4.6 mm, Heptane/iso-propanol = 80/20, 1.0 mL/min,  $\lambda = 220$  nm,  $t_{\text{major}} = 7.50$  min,  $t_{\text{minor}} = 8.37$  min.  $[\alpha]_{\text{D}}^{20}$  -19.3 ( $c$  1.00,  $\text{CHCl}_3$ ).

**Compound 12: dimethyl (1S,2S)-1-(bis(tert-butoxycarbonyl)amino)-2-(4-(trifluoromethoxy)phenyl)cyclopropane-1,2-dicarboxylate**

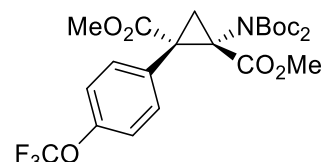

Compound **12** was prepared according to the general procedure B and obtained as a colorless oil in 75% yield, 99:1 d.r., 98.5:1.5 e.r..  $^1\text{H NMR}$  (300 MHz,  $\text{CDCl}_3$ )  $\delta$  7.52 (d,  $J = 7.9$  Hz, 2H), 7.14 (d,  $J = 8.0$  Hz, 2H), 3.60 (s, 3H), 3.27 (s, 3H), 2.55 (d,  $J = 6.2$  Hz, 1H), 2.27 (d,  $J = 6.2$  Hz, 1H), 1.55 (s, 9H), 1.50 (s, 9H).  $^{13}\text{C NMR}$  (75 MHz,  $\text{CDCl}_3$ )  $\delta$  169.36 (s, 1C), 168.06 (s, 1C), 153.05 (s, 1C), 152.45 (s, 1C), 148.64 (q,  $J = 1.7$  Hz, 1C), 134.62 (s,

1C), 131.79 (s, 2C), 120.59 (q,  $J = 257.0$  Hz, 1C), 120.43 (s, 2C), 83.15 (s, 2C), 53.15 (s, 1C), 52.47 (s, 1C), 50.41 (s, 1C), 44.28 (s, 1C), 28.13 (s, 6C), 26.87 (s, 1C).  **$^{19}\text{F}$  NMR** (282 MHz,  $\text{CDCl}_3$ )  $\delta$  -57.84 (s). **HR-MS** (ESI)  $m/z$  calcd for  $\text{C}_{24}\text{H}_{30}\text{NO}_9\text{F}_3\text{K}$   $[\text{M}+\text{K}]^+$  572.1510, found 572.1489. **IR** ( $\text{cm}^{-1}$ ) 2983, 2957, 1734, 1708, 1511, 1436, 1367, 1252, 1222, 1160, 1116, 1068, 1016, 958. **HPLC** Daicel Chiralpak IC-3, 150 mm,  $\text{O}$  4.6 mm, Heptane/iso-propanol = 90/10, 1.0 mL/min,  $\lambda = 220$  nm,  $t_{\text{major}} = 4.16$  min,  $t_{\text{minor}} = 8.50$  min.  $[\alpha]_{\text{D}}^{20}$  -18.1 ( $c$  1.00,  $\text{CHCl}_3$ ).

**Compound 13 : dimethyl (1S,2S)-1-(bis(tert-butoxycarbonyl)amino)-2-(3-(trifluoromethyl)phenyl)cyclopropane-1,2-dicarboxylate**

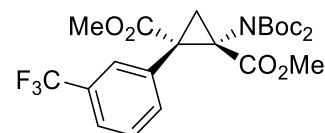

Compound **13** was prepared according to the general procedure B and obtained as a colorless oil in 81% yield, 99:1 d.r., 97.5:2.5 e.r..  **$^1\text{H}$  NMR** (300 MHz,  $\text{CDCl}_3$ )  $\delta$  7.69 (d,  $J = 9.9$  Hz, 2H), 7.53 (d,  $J = 7.8$  Hz, 1H), 7.43 (t,  $J = 7.7$  Hz, 1H), 3.60 (s, 3H), 3.31 (s, 3H), 2.57 (d,  $J = 6.2$  Hz, 1H), 2.30 (d,  $J = 6.2$  Hz, 1H), 1.56 (s, 9H), 1.51 (s, 9H).  **$^{13}\text{C}$  NMR** (75 MHz,  $\text{CDCl}_3$ )  $\delta$  168.98 (s, 1C), 167.85 (s, 1C), 152.75 (s, 1C), 152.22 (s, 1C), 136.87 (s, 1C), 133.89 (d,  $J = 2.1$  Hz, 1C), 130.25 (q,  $J = 32.3$  Hz, 1C), 128.38 (s, 1C), 126.81 (dd,  $J = 5.8, 3.3$  Hz, 1C), 124.45 (s, q,  $J = 3.8$  Hz, 1C), 124.09 (q,  $J = 272.1$  Hz, 1C), 83.17 (s, 1C), 83.06 (s, 1C), 53.06 (s, 1C), 52.50 (s, 1C), 50.20 (s, 1C), 44.59 (s, 1C), 28.01 (s, 6C), 26.92 (s, 1C).  **$^{19}\text{F}$  NMR** (282 MHz,  $\text{CDCl}_3$ )  $\delta$  -62.43 (s). **HR-MS** (ESI)  $m/z$  calcd for  $\text{C}_{24}\text{H}_{30}\text{NO}_8\text{F}_3\text{K}$   $[\text{M}+\text{K}]^+$  556.1561, found 556.1548. **IR** ( $\text{cm}^{-1}$ ) 2983, 1733, 1709, 1436, 1367, 1325, 1273, 1227, 1163, 1116, 1069, 958. **HPLC** Daicel Chiralpak IE-3, 150 mm,  $\text{O}$  4.6 mm, Heptane/iso-propanol = 95/5, 1.0 mL/min,  $\lambda = 220$  nm,  $t_{\text{major}} = 7.21$  min,  $t_{\text{minor}} = 7.84$  min.  $[\alpha]_{\text{D}}^{20}$  -30.9 ( $c$  1.00,  $\text{CHCl}_3$ ).

**Compound 14 : dimethyl (1S,2S)-1-(bis(tert-butoxycarbonyl)amino)-2-(3,4-dichlorophenyl)cyclopropane-1,2-dicarboxylate**

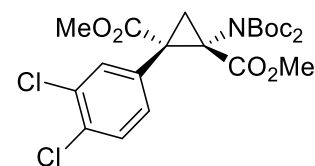

Compound **14** was prepared according to the general procedure B and obtained as a colorless oil in 71% yield, 99:1 d.r., 98:2 e.r..  **$^1\text{H}$  NMR** (300 MHz,  $\text{CDCl}_3$ )  $\delta$  7.54 (s, 1H), 7.36 (s, 2H), 3.60 (s, 3H), 3.40 (s, 3H), 2.52 (d,  $J = 6.2$  Hz, 1H), 2.26 (d,  $J = 6.2$  Hz, 1H), 1.55 (s, 9H), 1.51 (s, 9H).  **$^{13}\text{C}$  NMR** (75 MHz,  $\text{CDCl}_3$ )  $\delta$  168.94 (s, 1C), 167.98 (s, 1C), 152.96 (s, 1C), 152.28 (s, 1C), 136.15 (s, 1C), 132.16 (s, 1C), 132.01 (s, 1C), 131.90 (s, 1C), 130.02 (s, 1C), 129.91 (s, 1C), 83.32 (s, 1C), 83.25 (s, 1C), 53.25 (s, 1C), 52.86 (s, 1C), 50.31 (s, 1C), 44.16 (s, 1C), 28.16 (s, 6C), 27.22 (s, 1C). **HR-MS** (ESI)  $m/z$  calcd for  $\text{C}_{23}\text{H}_{29}\text{NO}_8\text{Cl}_2\text{Na}$   $[\text{M}+\text{Na}]^+$  540.1168, found 540.1148. **IR** ( $\text{cm}^{-1}$ ) 2982, 2954, 1732, 1708, 1473, 1435, 1366, 1275, 1227, 1165, 1116, 1067, 1032, 957. **HPLC** Daicel Chiralpak IE-3, 150 mm,  $\text{O}$  4.6 mm, Heptane/iso-propanol = 95/5, 1.0 mL/min,  $\lambda = 220$  nm,  $t_{\text{major}} = 7.96$  min,  $t_{\text{minor}} = 8.98$  min.  $[\alpha]_{\text{D}}^{20}$  -58.8 ( $c$  1.00,  $\text{CHCl}_3$ ).

**Compound 15**: 2-ethyl 1-methyl (1*S*,2*S*)-1-(bis(tert-butoxycarbonyl)amino)-2-((trimethylsilyl)ethynyl)cyclopropane-1,2-dicarboxylate

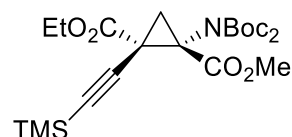

Compound **15** was prepared according to the general procedure B and obtained as a colorless oil in 68% yield, 99:1 d.r., 93:7 e.r..  $^1\text{H NMR}$  (300 MHz,  $\text{CDCl}_3$ )  $\delta$  4.40 – 3.96 (m, 2H), 3.75 (s, 3H), 2.54 (d,  $J = 6.2$  Hz, 1H), 2.15 (d,  $J = 6.2$  Hz, 1H), 1.48 (s, 9H), 1.47 (s, 9H), 1.29 (t,  $J = 7.2$  Hz, 3H), 0.14 (s, 9H).  $^{13}\text{C NMR}$  (75 MHz,  $\text{CDCl}_3$ )  $\delta$  167.18 (s, 1C), 166.67 (s, 1C), 151.76 (s, 1C), 150.85 (s, 1C), 99.43 (s, 1C), 89.27 (s, 1C), 83.34 (s, 1C), 83.11 (s, 1C), 62.49 (s, 1C), 52.70 (s, 1C), 51.95 (s, 1C), 34.65 (s, 1C), 30.00 (s, 1C), 28.12 (s, 3C), 27.93 (s, 3C), 13.96 (s, 1C), -0.06 (s, 3C). **HR-MS** (ESI)  $m/z$  calcd for  $\text{C}_{23}\text{H}_{37}\text{NO}_8\text{SiNa}$   $[\text{M}+\text{Na}]^+$  506.2186, found 506.2178. **IR** ( $\text{cm}^{-1}$ ) 2981, 2258, 2179, 1798, 1732, 1457, 1368, 1277, 1249, 1213, 1156, 1121, 1097, 1066, 977. **HPLC** Daicel Chiralpak IE-3, 150 mm,  $\varnothing$  4.6 mm, Heptane/iso-propanol = 90/10, 1.0 mL/min,  $\lambda = 220$  nm,  $t_{\text{major}} = 9.10$  min,  $t_{\text{minor}} = 8.59$  min.  $[\alpha]_{\text{D}}^{20} -17.4$  (c 1.00,  $\text{CHCl}_3$ ).

**Compound 16**: 2-ethyl 1-methyl (1*S*,2*S*)-1-(bis(tert-butoxycarbonyl)amino)-2-(phenylethynyl)cyclopropane-1,2-dicarboxylate

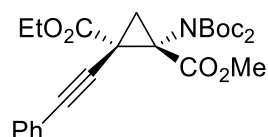

Compound **16** was prepared according to the general procedure B and obtained as a colorless oil in 31% yield, 99:1 d.r., 98:2 e.r..  $^1\text{H NMR}$  (300 MHz,  $\text{CDCl}_3$ )  $\delta$  7.41 (dd,  $J = 6.7$ , 3.0 Hz, 2H), 7.28 (dd,  $J = 4.9$ , 1.8 Hz, 3H), 4.35 – 4.07 (m, 2H), 3.76 (s, 3H), 2.62 (d,  $J = 6.2$  Hz, 1H), 2.27 (d,  $J = 6.2$  Hz, 1H), 1.51 (s, 9H), 1.50 (s, 9H), 1.33 (t,  $J = 7.2$  Hz, 3H).  $^{13}\text{C NMR}$  (75 MHz,  $\text{CDCl}_3$ )  $\delta$  167.41 (s, 1C), 166.84 (s, 1C), 151.87 (s, 1C), 151.12 (s, 1C), 131.85 (s, 2C), 128.32 (s, 3C), 123.16 (s, 1C), 84.10 (s, 1C), 83.72 (s, 1C), 83.39 (s, 1C), 83.22 (s, 1C), 62.59 (s, 1C), 53.03 (s, 1C), 51.95 (s, 1C), 34.65 (s, 1C), 30.25 (s, 1C), 28.15 (s, 3C), 27.96 (s, 3C), 14.10 (s, 1C). **HR-MS** (ESI)  $m/z$  calcd for  $\text{C}_{26}\text{H}_{33}\text{NO}_8\text{K}$   $[\text{M}+\text{K}]^+$  526.1843, found 526.1843. **IR** ( $\text{cm}^{-1}$ ) 2981, 2936, 1797, 1732, 1443, 1368, 1275, 1234, 1154, 1119, 1097, 1065, 973. **HPLC** Daicel Chiralpak IE-3, 150 mm,  $\varnothing$  4.6 mm, Heptane/iso-propanol = 90/10, 1.0 mL/min,  $\lambda = 220$  nm,  $t_{\text{major}} = 12.91$  min,  $t_{\text{minor}} = 12.20$  min.  $[\alpha]_{\text{D}}^{20} -9.4$  (c 1.00,  $\text{CHCl}_3$ ).

**Compound 17**: 2-ethyl 1-methyl (1*S*,2*S*)-1-(bis(tert-butoxycarbonyl)amino)-2-((*E*)-styryl)cyclopropane-1,2-dicarboxylate

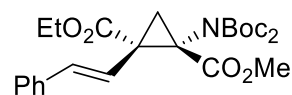

Compound **17** was prepared according to the general procedure B and obtained as a colorless oil in 55% yield, 99:1 d.r., 97:3 e.r..  $^1\text{H NMR}$  (300 MHz,  $\text{CDCl}_3$ )  $\delta$  7.39 (dd,  $J = 8.3$ , 1.4 Hz, 2H), 7.35 – 7.22 (m, 3H), 6.53 (s, 2H), 4.14 (ddd,  $J = 25.7$ , 10.8, 7.1 Hz, 2H), 3.60 (s, 3H), 2.55 (d,  $J = 6.5$  Hz, 1H), 2.17 (d,  $J = 6.5$  Hz, 1H), 1.52 (s, 18H), 1.27 (t,  $J = 7.1$  Hz, 3H).  $^{13}\text{C NMR}$  (75 MHz,  $\text{CDCl}_3$ )  $\delta$  168.88 (s, 1C), 167.73 (s, 1C), 152.14 (s, 1C), 151.93 (s, 1C),



136.86 (s, 1C), 134.51 (s, 1C), 128.65 (s, 2C), 127.88 (s, 1C), 126.72 (s, 2C), 121.55 (s, 1C), 83.06 (s, 1C), 82.92 (s, 1C), 61.91 (s, 1C), 52.74 (s, 1C), 50.37 (s, 1C), 43.43 (s, 1C), 28.15 (s, 3C), 28.06 (s, 3C), 25.77 (s, 1C), 14.12 (s, 1C). **HR-MS** (ESI)  $m/z$  calcd for  $C_{26}H_{35}NO_8K$   $[M+K]^+$  528.2000, found 528.2014. **IR** ( $cm^{-1}$ ) 2969, 1794, 1741, 1717, 1446, 1368, 1257, 1154, 1092, 1021, 975. **HPLC** Daicel Chiralpak IC-3, 150 mm,  $\varnothing$  4.6 mm, Heptane/iso-propanol = 70/30, 1.0 mL/min,  $\lambda$  = 220 nm,  $t_{major}$  = 4.77 min,  $t_{minor}$  = 16.58 min.  $[\alpha]_D^{20}$  -12.5 (c 1.00,  $CHCl_3$ ).

**Compound 18** : methyl (1*S*,2*R*)-2-((tert-butoxycarbonyl)amino)-2-(diethoxyphosphoryl)-1-phenyl cyclopropane-1-carboxylate

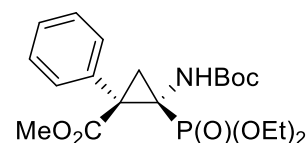

Compound **18** was prepared according to the general procedure D and obtained as an amorphous solid in 63% yield, 92.5:7.5 e.r..  **$^1H$  NMR** (300 MHz,  $CDCl_3$ )  $\delta$  7.50 – 7.42 (m, 2H), 7.41 – 7.28 (m, 3H), 4.43 (s, 1H), 4.33 – 4.12 (m, 4H), 3.69 (s, 3H), 2.52 (ddd,  $J$  = 14.1, 6.9, 0.9 Hz, 1H), 2.29 (t,  $J$  = 6.9 Hz, 1H), 1.44 – 1.37 (m, 3H), 1.35 – 1.23 (m, 12H).  **$^{13}C$  NMR** (75 MHz,  $CDCl_3$ )  $\delta$  169.54 (1C, d,  $J$  = 4.0 Hz), 154.42 (1C, s), 133.72 (1C, s), 130.14 (2C, s), 128.83 (2C, s), 128.34 (1C, s), 80.04 (1C, s), 63.34 (1C, d,  $J$  = 3.8 Hz), 63.03 (1C, d,  $J$  = 6.1 Hz), 52.92 (1C, s), 42.07 (1C, s), 36.69 (1C, d,  $J$  = 217.4 Hz), 28.21 (3C, s), 21.41 (1C, s), 16.69 (1C, d,  $J$  = 6.0 Hz), 16.47 (1C, d,  $J$  = 6.6 Hz).  **$^{31}P$  NMR** (121 MHz,  $CDCl_3$ )  $\delta$  21.17. **HR-MS** (ESI+)  $m/z$  calcd for  $C_{20}H_{30}NO_7PNa$   $[M+Na]^+$  450.1658. found 450.1654. **IR** ( $cm^{-1}$ ) 2983, 1728, 1498, 1363, 1240, 1160, 1051, 1022, 977. **HPLC** Daicel Chiralpak IE, 150 mm,  $\varnothing$  4.6 mm, Heptane/iso-propanol = 80/20, 1.0 mL/min,  $\lambda$  = 210 nm,  $t_{minor}$  = 11.80 min,  $t_{major}$  = 14.54 min.  $[\alpha]_D^{20}$  +24.6 (c 1.00,  $CH_2Cl_2$ ).

**Compound 19** : methyl (1*S*,2*R*)-2-(((benzyloxy)carbonyl)amino)-2-(diethoxyphosphoryl)-1-phenylcyclopropane-1-carboxylate

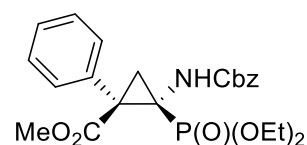

Compound **19** was prepared according to the general procedure D and obtained as an amorphous solid in 80% yield, 93.5:6.5 e.r..  **$^1H$  NMR** (400 MHz,  $CDCl_3$ )  $\delta$  7.50 – 7.42 (m, 2H), 7.38 – 7.32 (m, 4H), 7.31 – 7.27 (m, 2H), 7.17 – 7.04 (m, 2H), 4.91 (dd,  $J$  = 41.2, 12.4 Hz, 2H), 4.71 (s, 1H), 4.22 (tq,  $J$  = 14.1, 7.0 Hz, 4H), 3.70 (s, 3H), 2.55 (dd,  $J$  = 13.8, 6.9 Hz, 1H), 2.28 (t,  $J$  = 6.8 Hz, 1H), 1.39 (t,  $J$  = 7.1 Hz, 3H), 1.28 (t,  $J$  = 7.1 Hz, 4H).  **$^{13}C$  NMR** (101 MHz,  $CDCl_3$ )  $\delta$  169.32 (1C, s), 154.94 (1C, s), 136.27 (1C, s), 133.52 (1C, s), 130.16 (2C, s), 129.01 (2C, s), 128.56 (2C, s), 128.53 (1C, s), 128.18 (1C, s), 127.74 (2C, s), 66.72 (1C, s), 63.49 (1C, d,  $J$  = 5.3 Hz), 63.08 (1C, d,  $J$  = 6.4 Hz), 52.99 (1C, s), 42.23 (1C, s), 36.61 (1C, d,  $J$  = 218.7 Hz), 21.47 (1C, s), 16.67 (1C, d,  $J$  = 6.1 Hz), 16.46 (1C, d,  $J$  = 6.3 Hz).  **$^{31}P$  NMR** (162 MHz,  $CDCl_3$ )  $\delta$  20.62. **HR-MS** (ESI+)  $m/z$  calcd for  $C_{23}H_{29}NO_7P$   $[M+H]^+$  462.1676. found 462.1678. **IR** ( $cm^{-1}$ ) 2983, 1730, 1495, 1450, 1303, 1222, 1172, 1057, 1020, 972, 746. **HPLC** Daicel Chiralpak IB, 250 mm,  $\varnothing$  4.6 mm, Heptane/iso-propanol = 90/10, 1.0 mL/min,  $\lambda$  = 210 nm,  $t_{minor}$  = 8.21 min,  $t_{major}$  = 8.95 min.  $[\alpha]_D^{20}$  +20.1 (c 1.00,  $CHCl_3$ ).

**Compound 20**: ethyl (1*S*,2*R*)-2-(((benzyloxy)carbonyl)amino)-2-(diethoxyphosphoryl)-1-phenyl cyclopropane-1-carboxylate

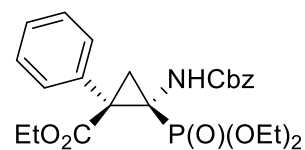

Compound **20** was prepared according to the general procedure D and obtained as an amorphous solid in 41% yield, 89.5:10.5 e.r.. **<sup>1</sup>H NMR** (400 MHz, CDCl<sub>3</sub>) δ 7.50 – 7.40 (m, 2H), 7.39 – 7.31 (m, 4H), 7.30 – 7.26 (m, 2H), 7.18 – 7.02 (m, 2H), 4.91 (dd, *J* = 40.8, 12.4 Hz, 2H), 4.70 (s, 1H), 4.26 – 4.17 (m, 4H), 4.13 (dd, *J* = 14.2, 7.1 Hz, 2H), 2.52 (dd, *J* = 13.8, 6.9 Hz, 1H), 2.28 (t, *J* = 6.7 Hz, 1H), 1.38 (t, *J* = 7.1 Hz, 3H), 1.26 (dt, *J* = 14.2, 7.1 Hz, 6H). **<sup>13</sup>C NMR** (101 MHz, CDCl<sub>3</sub>) δ 168.79 (1C, s), 154.95 (1C, s), 136.31 (1C, s), 133.69 (1C, s), 130.14 (2C, s), 128.97 (2C, s), 128.56 (2C, s), 128.45 (1C, s), 128.16 (1C, s), 127.71 (2C, s), 66.68 (1C, s), 63.44 (1C, d, *J* = 5.1 Hz), 63.01 (1C, d, *J* = 6.3 Hz), 62.01 (1C, s), 42.44 (1C, s), 36.59 (1C, d, *J* = 218.7 Hz), 21.40 (1C, s), 16.65 (1C, d, *J* = 6.1 Hz), 16.45 (1C, d, *J* = 6.4 Hz), 14.00 (1C, s). **<sup>31</sup>P NMR** (162 MHz, CDCl<sub>3</sub>) δ 20.63. **HR-MS** (ESI+) *m/z* calcd for C<sub>24</sub>H<sub>31</sub>NO<sub>7</sub>P [M+H]<sup>+</sup> 476.1833. found 476.1833. **IR** (cm<sup>-1</sup>) 2991, 2364, 1728, 1519, 1294, 1224, 1188, 1051, 1022, 970. **HPLC** Daicel Chiralpak IB, 250 mm, Ø 4.6 mm, Heptane/Ethanol = 95/5, 1.0 mL/min, λ = 210 nm, *t*<sub>minor</sub> = 7.22 min, *t*<sub>major</sub> = 7.68 min. [α]<sub>D</sub><sup>20</sup> +18.3 (*c* 1.00, CH<sub>2</sub>Cl<sub>2</sub>).

**Compound 21**: methyl (1*S*,2*R*)-2-(((benzyloxy)carbonyl)amino)-2-(diethoxyphosphoryl)-1-(*p*-tolyl) cyclopropane-1-carboxylate

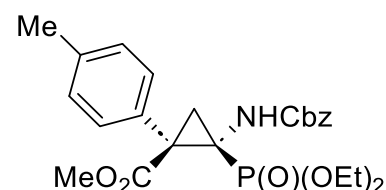

Compound **21** was prepared according to the general procedure D and obtained as an amorphous solid in 72% yield, 95:5 e.r.. **<sup>1</sup>H NMR** (400 MHz, CDCl<sub>3</sub>) δ 7.35 – 7.26 (m, 5H), 7.20 – 7.04 (m, 4H), 4.92 (dd, *J* = 40.7, 12.4 Hz, 2H), 4.70 (s, 1H), 4.28 – 4.12 (m, 4H), 3.68 (s, 3H), 2.52 (dd, *J* = 13.9, 6.9 Hz, 1H), 2.33 (s, 3H), 2.25 (t, *J* = 6.6 Hz, 1H), 1.38 (t, *J* = 7.1 Hz, 3H), 1.28 (t, *J* = 7.1 Hz, 3H). **<sup>13</sup>C NMR** (101 MHz, CDCl<sub>3</sub>) δ 169.44 (1C, s), 154.97 (1C, s), 138.33 (1C, s), 136.32 (1C, s), 130.41 (1C, s), 129.96 (2C, s), 129.72 (2C, s), 128.53 (2C, s), 128.15 (1C, s), 127.77 (2C, s), 66.67 (1C, s), 63.44 (1C, d, *J* = 4.4 Hz), 63.04 (1C, d, *J* = 6.4 Hz), 52.92 (1C, s), 41.93 (1C, s), 36.55 (1C, d, *J* = 217.9 Hz), 21.51 (1C, s), 21.28 (1C, s), 16.65 (1C, d, *J* = 6.0 Hz), 16.44 (1C, d, *J* = 6.4 Hz). **<sup>31</sup>P NMR** (162 MHz, CDCl<sub>3</sub>) δ 20.75. **HR-MS** (ESI+) *m/z* calcd for C<sub>24</sub>H<sub>31</sub>NO<sub>7</sub>P [M+H]<sup>+</sup> 476.1833. found 476.1831. **IR** (cm<sup>-1</sup>) 2987, 2364, 1737, 1512, 1429, 1224, 1170, 1060, 1028, 970. **HPLC** Daicel Chiralpak IA, 250 mm, Ø 4.6 mm, Heptane/Ethanol = 95/5, 1.0 mL/min, λ = 210 nm, *t*<sub>minor</sub> = 15.48 min, *t*<sub>major</sub> = 18.16 min. [α]<sub>D</sub><sup>20</sup> +28.7 (*c* 1.00, CH<sub>2</sub>Cl<sub>2</sub>).

**Compound 22**: ethyl (1*S*,2*R*)-2-(((benzyloxy)carbonyl)amino)-2-(diethoxyphosphoryl)-1-(*p*-tolyl) cyclopropane-1-carboxylate

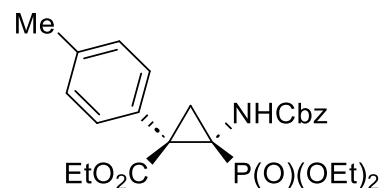

Compound **22** was prepared according to the general procedure D and obtained as an amorphous solid in 48% yield, 97:3 e.r.. **<sup>1</sup>H NMR** (400 MHz, CDCl<sub>3</sub>) δ 7.38 – 7.27 (m, 5H), 7.20 – 7.05 (m, 4H), 4.92 (dd, *J* = 39.3, 12.5 Hz, 2H), 4.69 (s, 1H), 4.27 – 4.16 (m, 4H), 4.12 (q, *J* = 7.2 Hz, 2H), 2.50 (dd, *J* = 13.8, 6.8 Hz, 1H), 2.34 (s, 3H), 2.24 (t, *J* = 6.5 Hz, 1H), 1.37 (t, *J* = 7.1 Hz, 4H), 1.26 (dt, *J* = 14.2, 7.0 Hz, 6H). **<sup>13</sup>C NMR** (101 MHz, CDCl<sub>3</sub>) δ 168.81 (1C, s), 154.86 (1C, s), 138.13 (1C, s), 136.24 (1C, s), 130.46 (1C, s), 129.81 (2C, s), 129.57 (2C, s), 128.41 (2C, s), 128.03 (1C, s), 127.60 (2C, s), 66.52 (1C, s), 63.30 (1C, s), 62.86 (1C, d, *J* = 6.1 Hz), 61.81 (1C, s), 42.03 (1C, s), 36.41 (1C, d, *J* = 219.6 Hz), 21.32 (1C, s), 21.17 (1C, s), 16.52 (1C, d, *J* = 6.2 Hz), 16.32 (1C, d, *J* = 6.3 Hz), 13.88 (1C, s). **<sup>31</sup>P NMR** (162 MHz, CDCl<sub>3</sub>) δ 20.78. **HR-MS** (ESI+) *m/z* calcd for C<sub>25</sub>H<sub>33</sub>NO<sub>7</sub>P [M+H]<sup>+</sup> 490.1989. found 490.1989. **IR** (cm<sup>-1</sup>) 2926, 2357, 1737, 1519, 1462, 1301, 1228, 1097, 1060, 1018, 970. **HPLC** Daicel Chiralpak IB, 250 mm, Ø 4.6 mm, Heptane/Ethanol = 98/2, 1.0 mL/min, λ = 210 nm, *t*<sub>minor</sub> = 14.52 min, *t*<sub>major</sub> = 15.36 min. [α]<sub>D</sub><sup>20</sup> +28.5 (c 1.00, CH<sub>2</sub>Cl<sub>2</sub>).

**Compound 23**: methyl (1*S*,2*R*)-2-(((benzyloxy)carbonyl)amino)-2-(diethoxyphosphoryl)-1-(4-methoxyphenyl)cyclopropane-1-carboxylate

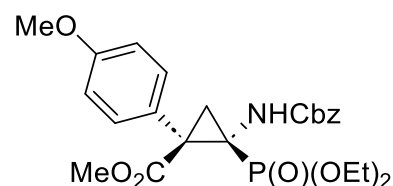

Compound **23** was prepared according to the general procedure D and obtained as an amorphous solid in 85% yield, 91:9 e.r.. **<sup>1</sup>H NMR** (400 MHz, CDCl<sub>3</sub>) δ 7.45 – 7.31 (m, 2H), 7.33 – 7.22 (m, 3H), 7.19 – 7.08 (m, 2H), 6.90 – 6.83 (m, 2H), 4.92 (dd, *J* = 41.3, 12.4 Hz, 2H), 4.71 (s, 1H), 4.28 – 4.13 (m, 4H), 3.79 (s, 3H), 3.69 (s, 3H), 2.51 (dd, *J* = 13.9, 6.9 Hz, 1H), 2.23 (t, *J* = 6.6 Hz, 1H), 1.38 (t, *J* = 7.1 Hz, 3H), 1.28 (t, *J* = 7.0 Hz, 3H). **<sup>13</sup>C NMR** (101 MHz, CDCl<sub>3</sub>) δ 169.45 (1C, d, *J* = 4.2 Hz), 159.60 (1C, s), 154.88 (1C, s), 136.18 (1C, s), 131.18 (2C, s), 128.44 (2C, s), 128.07 (1C, s), 127.66 (2C, s), 125.24 (1C, s), 114.28 (2C, s), 66.59 (1C, s), 63.31 (1C, d, *J* = 4.5 Hz), 62.93 (1C, d, *J* = 6.4 Hz), 55.29 (1C, s), 52.79 (1C, s), 42.03 – 41.50 (1C, m), 36.54 (1C, d, *J* = 218.3 Hz), 21.45 (1C, s), 16.53 (1C, d, *J* = 6.1 Hz), 16.33 (1C, d, *J* = 6.4 Hz). **<sup>31</sup>P NMR** (162 MHz, CDCl<sub>3</sub>) δ 20.79. **HR-MS** (ESI+) *m/z* calcd for C<sub>24</sub>H<sub>31</sub>NO<sub>8</sub>P [M+H]<sup>+</sup> 492.1782 found 492.1783. **IR** (cm<sup>-1</sup>) 2991, 2360, 1734, 1516, 1446, 1429, 1247, 1224, 1171, 1056, 1022. **HPLC** Daicel Chiralpak IA, 250 mm, Ø 4.6 mm, Heptane/iso-propanol = 80/20, 1.0 mL/min, λ = 210 nm, *t*<sub>minor</sub> = 8.75 min, *t*<sub>major</sub> = 7.89 min. [α]<sub>D</sub><sup>20</sup> +31.4 (c 1.00, CH<sub>2</sub>Cl<sub>2</sub>).

**Compound 24** : methyl (1*R*,2*S*)-1-([1,1'-biphenyl]-4-yl)-2-(((benzyloxy)carbonyl)amino)-2-(diethoxyphosphoryl)cyclopropane-1-carboxylate

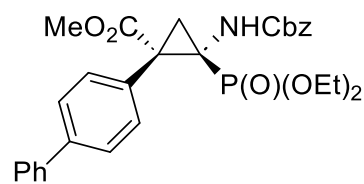

Compound **24** was prepared according to the general procedure D using  $\text{Rh}_2((S)\text{-p-PhTPCP})_4$  and obtained as an amorphous solid in 57% yield, 3:97 e.r..  $^1\text{H NMR}$  (400 MHz,  $\text{CDCl}_3$ )  $\delta$  7.60 – 7.55 (m, 4H), 7.54 – 7.48 (m, 2H), 7.48 – 7.43 (m, 2H), 7.39 – 7.33 (m, 2H), 7.25 – 7.18 (m, 2H), 7.17 – 7.08 (m, 2H), 4.92 (dd,  $J = 39.2, 12.4$  Hz, 2H), 4.77 (s, 1H), 4.23 (ddd,  $J = 10.5, 9.9, 4.9$  Hz, 4H), 3.72 (s, 3H), 2.58 (dd,  $J = 13.9, 6.9$  Hz, 1H), 2.34 (t,  $J = 6.8$  Hz, 1H), 1.40 (t,  $J = 7.1$  Hz, 3H), 1.30 (t,  $J = 7.0$  Hz, 3H).  $^{13}\text{C NMR}$  (101 MHz,  $\text{CDCl}_3$ )  $\delta$  169.32 (1C, d,  $J = 4.3$  Hz), 155.01 (1C, s), 141.33 (1C, s), 140.44 (2C, s), 136.21 (1C, s), 132.44 (1C, s), 130.54 (1C, s), 128.97 (2C, s), 128.56 (1C, s), 128.21 (1C, s), 127.82 (2C, s), 127.72 (1C, s), 127.64 (2C, s), 127.20 (2C, s), 66.80 (1C, s), 63.52 (1C, d,  $J = 4.9$  Hz), 63.13 (1C, d,  $J = 6.2$  Hz), 53.04 (1C, s), 41.97 (1C, s), 36.84 (1C, d,  $J = 218.0$  Hz), 21.50 (1C, s), 16.67 (1C, d,  $J = 6.1$  Hz), 16.47 (1C, d,  $J = 6.3$  Hz).  $^{31}\text{P NMR}$  (162 MHz,  $\text{CDCl}_3$ )  $\delta$  20.59. **HR-MS** (ESI+)  $m/z$  calcd for  $\text{C}_{29}\text{H}_{33}\text{NO}_7\text{P}$   $[\text{M}+\text{H}]^+$  538.1989 found 538.1990. **IR** ( $\text{cm}^{-1}$ ) 2987, 2364, 1734, 1487, 1232, 1170, 1110, 1051, 1024, 977. **HPLC** Daicel Chiralpak IB, 250 mm,  $\varnothing$  4.6 mm, Heptane/Ethanol = 95/5, 1.0 mL/min,  $\lambda = 210$  nm,  $t_{\text{major}} = 11.33$  min,  $t_{\text{minor}} = 12.45$  min.  $[\alpha]_{\text{D}}^{20} -36.9$  (c 1.00,  $\text{CH}_2\text{Cl}_2$ ).

**Compound 25** : methyl (1*S*,2*R*)-2-(((benzyloxy)carbonyl)amino)-2-(diethoxyphosphoryl)-1-(4-fluoro phenyl)cyclopropane-1-carboxylate

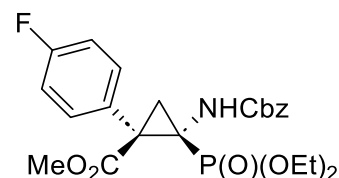

Compound **25** was prepared according to the general procedure D and obtained as an amorphous solid in 78% yield, 90:10 e.r..  $^1\text{H NMR}$  (400 MHz,  $\text{CDCl}_3$ )  $\delta$  7.42 – 7.30 (m, 2H), 7.28 – 7.20 (m, 3H), 7.13 – 7.01 (m, 2H), 7.00 – 6.92 (m, 2H), 4.85 (dd,  $J = 38.2, 12.4$  Hz, 2H), 4.64 (s, 1H), 4.21 – 4.05 (m, 4H), 3.62 (s, 3H), 2.47 (dd,  $J = 14.1, 7.0$  Hz, 1H), 2.20 (t,  $J = 6.8$  Hz, 1H), 1.31 (t,  $J = 7.1$  Hz, 3H), 1.23 – 1.17 (m, 3H).  $^{13}\text{C NMR}$  (101 MHz,  $\text{CDCl}_3$ )  $\delta$  169.09 (1C, s), 162.66 (1C, d,  $J = 247.9$  Hz), 154.82 (1C, s), 136.04 (1C, s), 131.86 (2C, d,  $J = 8.2$  Hz), 129.24 (1C, s), 128.47 (2C, s), 128.16 (1C, s), 127.71 (2C, s), 115.80 (2C, d,  $J = 21.7$  Hz), 66.71 (1C, s), 63.40 (1C, d,  $J = 5.4$  Hz), 63.00 (1C, d,  $J = 6.3$  Hz), 52.91 (1C, s), 41.40 (1C, s), 36.80 (1C, d,  $J = 217.7$  Hz), 21.36 (1C, s), 16.52 (1C, d,  $J = 5.9$  Hz), 16.33 (1C, d,  $J = 6.3$  Hz).  $^{19}\text{F NMR}$  (377 MHz,  $\text{CDCl}_3$ )  $\delta$  -113.13 (s).  $^{31}\text{P NMR}$  (162 MHz,  $\text{CDCl}_3$ )  $\delta$  20.41. **HR-MS** (ESI+)  $m/z$  calcd for  $\text{C}_{23}\text{H}_{28}\text{FNO}_7\text{P}$   $[\text{M}+\text{H}]^+$  480.1582 found 480.1581. **IR** ( $\text{cm}^{-1}$ ) 2999, 2360, 1734, 1512, 1442, 1305, 1220, 1163, 1064, 1028, 977. **HPLC** Daicel Chiralpak IB, 250 mm,  $\varnothing$  4.6 mm, Heptane/Ethanol = 95/5, 1.0 mL/min,  $\lambda = 210$  nm,  $t_{\text{minor}} = 9.12$  min,  $t_{\text{major}} = 9.89$  min.  $[\alpha]_{\text{D}}^{20} +17.7$  (c 1.00,  $\text{CH}_2\text{Cl}_2$ ).

**Compound 26**: methyl (1*S*,2*R*)-2-(((benzyloxy)carbonyl)amino)-1-(4-chlorophenyl)-2-(diethoxy phosphoryl)cyclopropane-1-carboxylate

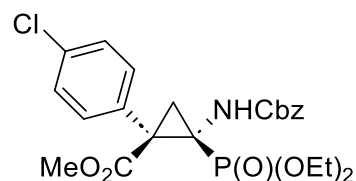

Compound **26** was prepared according to the general procedure D and obtained as an amorphous solid in 55% yield, 94.5:5.5 e.r..  $^1\text{H NMR}$  (400 MHz,  $\text{CDCl}_3$ )  $\delta$  7.43 – 7.36 (m, 2H), 7.35 – 7.29 (m, 5H), 7.19 – 7.08 (m, 2H), 4.93 (dd,  $J = 38.1, 12.4$  Hz, 2H), 4.69 (s, 1H), 4.20 (dp,  $J = 21.1, 7.0$  Hz, 4H), 3.70 (s, 3H), 2.55 (dd,  $J = 14.1, 7.0$  Hz, 1H), 2.27 (t,  $J = 6.8$  Hz, 1H), 1.38 (t,  $J = 7.1$  Hz, 3H), 1.28 (t,  $J = 7.0$  Hz, 3H).  $^{13}\text{C NMR}$  (101 MHz,  $\text{CDCl}_3$ )  $\delta$  168.88 (1C, s), 154.81 (1C, s), 136.01 (1C, s), 134.49 (1C, s), 131.98 (1C, s), 131.45 (2C, s), 129.02 (2C, s), 128.49 (2C, s), 128.18 (1C, s), 127.73 (2C, s), 66.74 (1C, s), 63.41 (1C, d,  $J = 5.2$  Hz), 63.02 (1C, d,  $J = 6.4$  Hz), 52.96 (1C, s), 41.50 (1C, s), 36.91 (1C, d,  $J = 217.2$  Hz), 21.23 (1C, s), 16.52 (1C, d,  $J = 6.1$  Hz), 16.33 (1C, d,  $J = 6.4$  Hz).  $^{31}\text{P NMR}$  (162 MHz,  $\text{CDCl}_3$ )  $\delta$  20.27. **HR-MS** (ESI+)  $m/z$  calcd for  $\text{C}_{23}\text{H}_{28}^{35}\text{ClNO}_7\text{P}$   $[\text{M}+\text{H}]^+$  496.1286 found 496.1287. **IR** ( $\text{cm}^{-1}$ ) 2987, 2364, 1734, 1494, 1232, 1093, 1022, 977. **HPLC** Daicel Chiralpak IB, 150 mm,  $\varnothing$  4.6 mm, Heptane/Ethanol = 97/3, 1.0 mL/min,  $\lambda = 210$  nm,  $t_{\text{minor}} = 13.54$  min,  $t_{\text{major}} = 14.80$  min.  $[\alpha]_{\text{D}}^{20} +28.2$  (c 1.00,  $\text{CH}_2\text{Cl}_2$ ).

**Compound 27**: methyl (1*S*,2*R*)-2-(((benzyloxy)carbonyl)amino)-1-(4-bromophenyl)-2-(diethoxy phosphoryl)cyclopropane-1-carboxylate

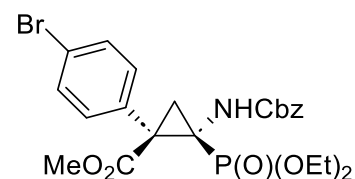

Compound **27** was prepared according to the general procedure D and obtained as a white solid in 89% yield, 89.5:10.5 e.r..  $^1\text{H NMR}$  (400 MHz,  $\text{CDCl}_3$ )  $\delta$  7.50 – 7.40 (m, 2H), 7.41 – 7.29 (m, 5H), 7.20 – 7.08 (m, 2H), 4.93 (dd,  $J = 39.2, 12.4$  Hz, 2H), 4.72 (s, 1H), 4.20 (dp,  $J = 21.2, 7.1$  Hz, 4H), 3.69 (s, 3H), 2.54 (dd,  $J = 14.1, 7.0$  Hz, 1H), 2.27 (t,  $J = 6.8$  Hz, 1H), 1.37 (t,  $J = 7.1$  Hz, 3H), 1.28 (t,  $J = 7.1$  Hz, 3H).  $^{13}\text{C NMR}$  (101 MHz,  $\text{CDCl}_3$ )  $\delta$  168.82 (1C, d,  $J = 4.0$  Hz), 154.82 (1C, s), 136.01 (1C, s), 132.51 (1C, s), 131.97 (2C, s), 131.78 (2C, s), 128.51 (2C, s), 128.18 (1C, s), 127.74 (2C, s), 122.70 (1C, s), 66.75 (1C, s), 63.43 (1C, d,  $J = 5.0$  Hz), 63.04 (1C, d,  $J = 6.3$  Hz), 52.97 (1C, s), 41.58 (1C, s), 36.90 (1C, d,  $J = 217.5$  Hz), 21.20 (1C, s), 16.52 (1C, d,  $J = 5.9$  Hz), 16.33 (1C, d,  $J = 6.4$  Hz).  $^{31}\text{P NMR}$  (162 MHz,  $\text{CDCl}_3$ )  $\delta$  20.25. **HR-MS** (ESI+)  $m/z$  calcd for  $\text{C}_{23}\text{H}_{28}^{79}\text{BrNO}_7\text{P}$   $[\text{M}+\text{H}]^+$  540.0781 found 540.0783. **IR** ( $\text{cm}^{-1}$ ) 2983, 1728, 1527, 1490, 1294, 1232, 1166, 1101, 1060, 1022, 974. **HPLC** Daicel Chiralpak IE, 150 mm,  $\varnothing$  4.6 mm, Heptane/iso-propanol = 70/30, 1.0 mL/min,  $\lambda = 220$  nm,  $t_{\text{minor}} = 9.82$  min,  $t_{\text{major}} = 12.31$  min.  $[\alpha]_{\text{D}}^{20} +30.3$  (c 1.00,  $\text{CH}_2\text{Cl}_2$ ). **MP** 140-143  $^{\circ}\text{C}$ .

**Compound 28**: ethyl (1*S*,2*R*)-2-(((benzyloxy)carbonyl)amino)-1-(4-bromophenyl)-2-(diethoxyphosphoryl)cyclopropane-1-carboxylate

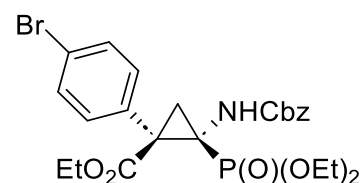

Compound **28** was prepared according to the general procedure D and obtained as a white solid in 84% yield, 97:3 e.r..  $^1\text{H NMR}$  (400 MHz,  $\text{CDCl}_3$ )  $\delta$  7.51 – 7.42 (m, 2H), 7.38 – 7.27 (m, 5H), 7.20 – 7.04 (m, 2H), 4.93 (dd,  $J = 38.3, 12.4$  Hz, 2H), 4.71 (s, 1H), 4.26 – 4.10 (m, 6H), 2.52 (dd,  $J = 14.1, 7.0$  Hz, 1H), 2.26 (t,  $J = 6.8$  Hz, 1H), 1.41 – 1.33 (m, 3H), 1.31 – 1.20 (m, 6H).  $^{13}\text{C NMR}$  (101 MHz,  $\text{CDCl}_3$ )  $\delta$  168.42 (s), 154.92 (s), 136.15 (s), 132.81 (s), 132.04 (s), 131.86 (s), 128.62 (s), 128.28 (s), 127.82 (s), 122.73 (s), 66.82 (s), 63.48 (d,  $J = 5.3$  Hz), 63.06 (d,  $J = 6.4$  Hz), 62.16 (s), 41.89 (s), 36.96 (d,  $J = 217.6$  Hz), 21.24 (s), 16.62 (d,  $J = 6.2$  Hz), 16.43 (d,  $J = 6.4$  Hz), 13.98 (s).  $^{31}\text{P NMR}$  (162 MHz,  $\text{CDCl}_3$ )  $\delta$  20.26. **HR-MS** (ESI+)  $m/z$  calcd for  $\text{C}_{24}\text{H}_{30}^{79}\text{BrNO}_7\text{P}$   $[\text{M}+\text{H}]^+$  554.0938 found 554.0939. **IR** ( $\text{cm}^{-1}$ ) 2976, 2364, 1724, 1519, 1494, 1298, 1224, 1178, 1064, 1022, 989. **HPLC** Daicel Chiralpak ID, 150 mm,  $\varnothing$  4.6 mm, Heptane/iso-propanol = 80/20, 1.0 mL/min,  $\lambda = 220$  nm,  $t_{\text{minor}} = 13.91$  min,  $t_{\text{major}} = 16.22$  min.  $[\alpha]_{\text{D}}^{20} +22.1$  (c 1.00,  $\text{CH}_2\text{Cl}_2$ ). **MP** 145-148 °C.

**Compound 29**: methyl (1*S*,2*R*)-2-(((benzyloxy)carbonyl)amino)-2-(diethoxyphosphoryl)-1-(4-iodophenyl)cyclopropane-1-carboxylate

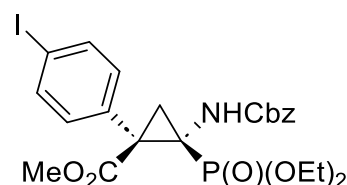

Compound **29** was prepared according to the general procedure D and obtained as an amorphous solid in 71% yield, 96:4 e.r..  $^1\text{H NMR}$  (400 MHz,  $\text{CDCl}_3$ )  $\delta$  7.70 – 7.62 (m, 2H), 7.31 (d,  $J = 6.8$  Hz, 3H), 7.17 (dd,  $J = 20.0, 7.3$  Hz, 4H), 4.93 (dd,  $J = 36.6, 12.4$  Hz, 2H), 4.70 (s, 1H), 4.20 (dt,  $J = 15.4, 6.4$  Hz, 4H), 3.69 (s, 3H), 2.53 (dd,  $J = 14.1, 7.0$  Hz, 1H), 2.26 (t,  $J = 6.8$  Hz, 1H), 1.37 (t,  $J = 7.1$  Hz, 3H), 1.28 (t,  $J = 7.0$  Hz, 3H).  $^{13}\text{C NMR}$  (101 MHz,  $\text{CDCl}_3$ )  $\delta$  168.92 (1C, d,  $J = 4.0$  Hz), 154.94 (1C, s), 138.07 (2C, s), 136.13 (1C, s), 133.32 (1C, s), 132.08 (2C, s), 128.66 (2C, s), 128.31 (1C, s), 127.87 (2C, s), 94.58 (1C, s), 66.88 (1C, s), 63.55 (1C, d,  $J = 5.4$  Hz), 63.14 (1C, d,  $J = 6.4$  Hz), 53.09 (1C, s), 41.80 (1C, s), 36.99 (1C, d,  $J = 217.0$  Hz), 21.24 (1C, s), 16.64 (1C, d,  $J = 6.0$  Hz), 16.44 (1C, d,  $J = 6.3$  Hz).  $^{31}\text{P NMR}$  (162 MHz,  $\text{CDCl}_3$ )  $\delta$  20.22. **HR-MS** (ESI+)  $m/z$  calcd for  $\text{C}_{23}\text{H}_{28}^{127}\text{INO}_7\text{P}$   $[\text{M}+\text{H}]^+$  588.0643 found 588.0643. **IR** ( $\text{cm}^{-1}$ ) 2991, 2364, 1728, 1519, 1433, 1298, 1224, 1166, 1097, 1051, 1018, 977. **HPLC** Daicel Chiralpak IB, 250 mm,  $\varnothing$  4.6 mm, Heptane/Ethanol = 95/5, 1.0 mL/min,  $\lambda = 210$  nm,  $t_{\text{minor}} = 9.60$  min,  $t_{\text{major}} = 10.34$  min.  $[\alpha]_{\text{D}}^{20} +32.1$  (c 1.00,  $\text{CH}_2\text{Cl}_2$ ).

**Compound 30**: methyl (1*S*,2*R*)-2-(((benzyloxy)carbonyl)amino)-2-(diethoxyphosphoryl)-1-(4-(trifluoromethyl)phenyl)cyclopropane-1-carboxylate

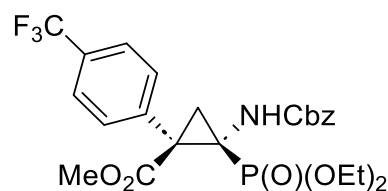

Compound **30** was prepared according to the general procedure D and obtained as an amorphous solid in 71% yield, 98.5:1.5 e.r..  $^1\text{H NMR}$  (400 MHz,  $\text{CDCl}_3$ )  $\delta$  7.67 – 7.57 (m, 4H), 7.35 – 7.26 (m, 3H), 7.19 – 7.06 (m, 2H), 4.92 (dd,  $J = 33.0, 12.3$  Hz, 2H), 4.71 (s, 1H), 4.20 (td,  $J = 14.4, 7.1$  Hz, 4H), 3.70 (s, 3H), 2.59 (dd,  $J = 14.1, 7.1$  Hz, 1H), 2.34 (t,  $J = 6.9$  Hz, 1H), 1.38 (t,  $J = 7.1$  Hz, 3H), 1.28 (t,  $J = 7.0$  Hz, 3H).  $^{13}\text{C NMR}$  (101 MHz,  $\text{CDCl}_3$ )  $\delta$  168.73 (1C, d,  $J = 4.0$  Hz), 154.92 (1C, s), 137.64 (1C, s), 136.03 (1C, s), 130.68 (2C, s), 128.61 (2C, s), 128.36 (1C, s), 127.89 (2C, s), 125.83 (2C, d,  $J = 3.5$  Hz), 124.04 (1C, q,  $J = 272.1$  Hz), 66.95 (1C, s), 63.62 (1C, d,  $J = 5.2$  Hz), 63.19 (1C, d,  $J = 6.3$  Hz), 53.18 (1C, s), 41.89 (1C, s), 37.27 (1C, d,  $J = 217.2$  Hz), 21.30 (1C, s), 16.63 (1C, d,  $J = 5.9$  Hz), 16.45 (1C, d,  $J = 6.2$  Hz).  $^{19}\text{F NMR}$  (377 MHz,  $\text{CDCl}_3$ )  $\delta$  -62.69 (s).  $^{31}\text{P NMR}$  (162 MHz,  $\text{CDCl}_3$ )  $\delta$  20.01. **HR-MS** (ESI+)  $m/z$  calcd for  $\text{C}_{24}\text{H}_{28}\text{F}_3\text{NO}_7\text{P}$   $[\text{M}+\text{H}]^+$  530.1550 found 530.1552. **IR** ( $\text{cm}^{-1}$ ) 2991, 2368, 1728, 1519, 1323, 1224, 1166, 1122, 1053, 1018, 977. **HPLC** Daicel Chiralpak IB, 250 mm,  $\varnothing$  4.6 mm, Heptane/Ethanol = 98/2, 1.0 mL/min,  $\lambda = 210$  nm,  $t_{\text{minor}} = 18.58$  min,  $t_{\text{major}} = 20.03$  min.  $[\alpha]_{\text{D}}^{20} +17.6$  (c 1.00,  $\text{CH}_2\text{Cl}_2$ ).

**Compound 31**: ethyl (1*S*,2*R*)-2-(((benzyloxy)carbonyl)amino)-2-(diethoxyphosphoryl)-1-(4-(trifluoromethyl)phenyl)cyclopropane-1-carboxylate

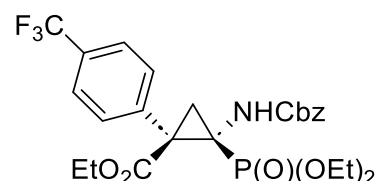

Compound **31** was prepared according to the general procedure D and obtained as an amorphous solid in 60% yield, 99:1 e.r..  $^1\text{H NMR}$  (400 MHz,  $\text{CDCl}_3$ )  $\delta$  7.64 – 7.55 (m, 4H), 7.36 – 7.27 (m, 3H), 7.18 – 7.05 (m, 2H), 4.92 (dd,  $J = 31.6, 12.3$  Hz, 2H), 4.69 (s, 1H), 4.25 – 4.12 (m, 6H), 2.57 (dd,  $J = 14.1, 7.0$  Hz, 1H), 2.33 (t,  $J = 6.8$  Hz, 1H), 1.38 (t,  $J = 7.1$  Hz, 3H), 1.27 (dt,  $J = 14.2, 7.1$  Hz, 6H).  $^{13}\text{C NMR}$  (101 MHz,  $\text{CDCl}_3$ )  $\delta$  168.07 (1C, d,  $J = 3.9$  Hz), 154.80 (1C, s), 137.70 (1C, s), 135.94 (1C, s), 130.51 (2C, s), 128.48 (2C, s), 128.22 (1C, s), 127.74 (2C, s), 125.67 (2C, d,  $J = 3.4$  Hz), 123.94 (1C, q,  $J = 271.9$  Hz), 66.79 (1C, s), 63.45 (1C, d,  $J = 5.2$  Hz), 63.00 (1C, d,  $J = 6.3$  Hz), 62.18 (1C, s), 41.96 (1C, s), 37.10 (1C, d,  $J = 217.1$  Hz), 21.12 (1C, s), 16.50 (1C, d,  $J = 6.1$  Hz), 16.32 (1C, d,  $J = 6.4$  Hz), 13.85 (1C, s).  $^{19}\text{F NMR}$  (377 MHz,  $\text{CDCl}_3$ )  $\delta$  -62.67 (s).  $^{31}\text{P NMR}$  (162 MHz,  $\text{CDCl}_3$ )  $\delta$  20.03. **HR-MS** (ESI+)  $m/z$  calcd for  $\text{C}_{25}\text{H}_{30}\text{F}_3\text{NO}_7\text{P}$   $[\text{M}+\text{H}]^+$  544.1707 found 544.1708. **IR** ( $\text{cm}^{-1}$ ) 2987, 2360, 1728, 1519, 1327, 1228, 1170, 1126, 1060, 1018, 977. **HPLC** Daicel Chiralpak IA, 250 mm,  $\varnothing$  4.6 mm, Heptane/Ethanol = 95/5, 1.0 mL/min,  $\lambda = 210$  nm,  $t_{\text{minor}} = 14.19$  min,  $t_{\text{major}} = 15.49$  min.  $[\alpha]_{\text{D}}^{20} +21.2$  (c 1.00,  $\text{CH}_2\text{Cl}_2$ ).

**Compound 32**: methyl (1*S*,2*R*)-2-(((benzyloxy)carbonyl)amino)-2-(diethoxyphosphoryl)-1-(*m*-tolyl)cyclopropane-1-carboxylate

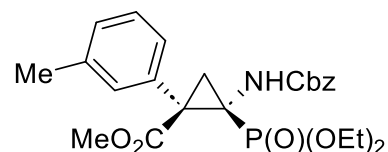

Compound **32** was prepared according to the general procedure D and obtained as an amorphous solid in 82% yield, 90:10 e.r..  $^1\text{H NMR}$  (400 MHz,  $\text{CDCl}_3$ )  $\delta$  7.41 – 7.26 (m, 3H), 7.26 – 7.20 (m, 3H), 7.18 – 7.07 (m, 3H), 4.92 (dd,  $J = 46.2, 12.4$  Hz, 2H), 4.73 (s, 1H), 4.27 – 4.15 (m, 4H), 3.69 (s, 3H), 2.52 (dd,  $J = 13.6, 6.8$  Hz, 1H), 2.34 (s, 3H), 2.25 (t,  $J = 6.2$  Hz, 1H), 1.38 (t,  $J = 7.1$  Hz, 3H), 1.28 (t,  $J = 6.9$  Hz, 3H).  $^{13}\text{C NMR}$  (101 MHz,  $\text{CDCl}_3$ )  $\delta$  169.43 (1C, d,  $J = 4.1$  Hz), 155.04 (1C, s), 138.76 (1C, s), 136.29 (1C, s), 133.34 (1C, s), 130.72 (1C, s), 129.38 (1C, s), 128.88 (1C, s), 128.57 (2C, s), 128.20 (1C, s), 127.77 (2C, s), 127.21 (1C, s), 66.74 (1C, s), 63.50 (1C, d,  $J = 4.4$  Hz), 63.11 (1C, d,  $J = 6.4$  Hz), 52.98 (1C, s), 42.21 (1C, s), 36.51 (1C, d,  $J = 218.0$  Hz), 21.61 (1C, s), 16.67 (1C, d,  $J = 5.9$  Hz), 16.46 (1C, d,  $J = 6.3$  Hz).  $^{31}\text{P NMR}$  (162 MHz,  $\text{CDCl}_3$ )  $\delta$  20.65. **HR-MS** (ESI+)  $m/z$  calcd for  $\text{C}_{24}\text{H}_{31}\text{NO}_7\text{P}$   $[\text{M}+\text{H}]^+$  476.1833. found 476.1832. **IR** ( $\text{cm}^{-1}$ ) 2983, 2364, 1734, 1523, 1429, 1305, 1220, 1159, 1051, 1022, 977. **HPLC** Daicel Chiralpak IB, 250 mm,  $\varnothing$  4.6 mm, Heptane/Ethanol = 95/5, 1.0 mL/min,  $\lambda = 210$  nm,  $t_{\text{minor}} = 7.89$  min,  $t_{\text{major}} = 8.51$  min.  $[\alpha]_{\text{D}}^{20} +12.6$  (c 1.00,  $\text{CH}_2\text{Cl}_2$ ).

**Compound 33**: ethyl (1*S*,2*R*)-2-(((benzyloxy)carbonyl)amino)-2-(diethoxyphosphoryl)-1-(3-methoxyphenyl)cyclopropane-1-carboxylate

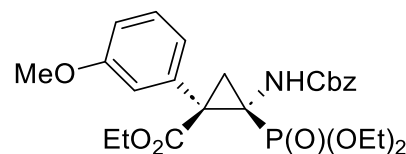

Compound **33** was prepared according to the general procedure D and obtained as an amorphous solid in 78% yield, 96.5:3.5 e.r..  $^1\text{H NMR}$  (400 MHz,  $\text{CDCl}_3$ )  $\delta$  7.36 – 7.26 (m, 4H), 7.18 – 7.08 (m, 2H), 7.08 – 6.98 (m, 2H), 6.89 – 6.81 (m, 1H), 4.93 (dd,  $J = 41.5, 12.5$  Hz, 2H), 4.74 (s, 1H), 4.18 (ddd,  $J = 18.9, 12.2, 5.1$  Hz, 6H), 3.79 (s, 3H), 2.50 (dd,  $J = 13.7, 6.9$  Hz, 1H), 2.24 (t,  $J = 6.6$  Hz, 1H), 1.37 (t,  $J = 7.1$  Hz, 3H), 1.27 (dd,  $J = 10.2, 7.0$  Hz, 6H).  $^{13}\text{C NMR}$  (101 MHz,  $\text{CDCl}_3$ )  $\delta$  168.69 (1C, d,  $J = 4.3$  Hz), 159.91 (1C, s), 154.98 (1C, s), 136.32 (1C, s), 135.06 (1C, s), 129.93 (1C, s), 128.55 (2C, s), 128.15 (1C, s), 127.69 (2C, s), 122.35 (1C, s), 115.89 (1C, s), 113.89 (1C, s), 66.68 (1C, s), 63.42 (1C, s), 62.97 (1C, d,  $J = 6.4$  Hz), 62.01 (1C, s), 55.36 (1C, s), 42.42 (1C, s), 36.54 (1C, d,  $J = 218.8$  Hz), 21.55 (1C, s), 16.63 (1C, d,  $J = 6.2$  Hz), 16.43 (1C, d,  $J = 6.5$  Hz), 14.00 (1C, s).  $^{31}\text{P NMR}$  (162 MHz,  $\text{CDCl}_3$ )  $\delta$  20.27. **HR-MS** (ESI+)  $m/z$  calcd for  $\text{C}_{25}\text{H}_{33}\text{NO}_8\text{P}$   $[\text{M}+\text{H}]^+$  506.1938 found 506.1936. **IR** ( $\text{cm}^{-1}$ ) 2991, 2360, 1724, 1593, 1487, 1286, 1232, 1163, 1018, 970. **HPLC** Daicel Chiralpak IB, 250 mm,  $\varnothing$  4.6 mm, Heptane/Ethanol = 97/3, 1.0 mL/min,  $\lambda = 210$  nm,  $t_{\text{minor}} = 12.25$  min,  $t_{\text{major}} = 13.29$  min.  $[\alpha]_{\text{D}}^{20} +27.8$  (c 1.00,  $\text{CH}_2\text{Cl}_2$ ).



**Compound 34** : methyl (1*S*,2*R*)-2-  
(((benzyloxy)carbonyl)amino)-2-(diethoxyphosphoryl)-1-  
(3-(trifluoromethyl)phenyl)cyclopropane-1-carboxylate

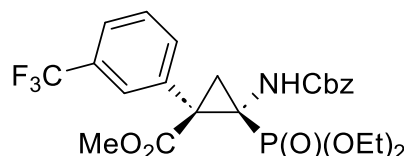

Compound **34** was prepared according to the general procedure D and obtained as an amorphous solid in 87% yield, 56.5:43.5 e.r..  $^1\text{H NMR}$  (400 MHz,  $\text{CDCl}_3$ )  $\delta$  7.73 – 7.67 (m, 2H), 7.58 (d,  $J$  = 7.8 Hz, 1H), 7.47 (t,  $J$  = 7.7 Hz, 1H), 7.34 – 7.27 (m, 3H), 7.19 – 7.07 (m, 2H), 4.92 (dd,  $J$  = 43.4, 12.3 Hz, 2H), 4.70 (s, 1H), 4.20 (qd,  $J$  = 14.4, 7.2 Hz, 4H), 3.70 (d,  $J$  = 6.4 Hz, 3H), 2.60 (dd,  $J$  = 14.2, 7.1 Hz, 1H), 2.33 (t,  $J$  = 6.9 Hz, 1H), 1.38 (t,  $J$  = 7.1 Hz, 3H), 1.29 (t,  $J$  = 7.0 Hz, 3H).  $^{13}\text{C NMR}$  (101 MHz,  $\text{CDCl}_3$ )  $\delta$  168.82 (1C, d,  $J$  = 3.9 Hz), 154.99 (1C, s), 136.06 (1C, s), 134.75 (1C, s), 133.80 (1C, s), 129.39 (1C, s), 128.62 (2C, s), 128.33 (1C, s), 127.89 (2C, s), 126.90 (1C, s), 125.42 (1C, d,  $J$  = 2.9 Hz), 123.95 (1C, q,  $J$  = 273.8 Hz), 66.99 (1C, s), 63.63 (1C, d,  $J$  = 6.1 Hz), 63.25 (1C, d,  $J$  = 6.5 Hz), 53.20 (1C, s), 41.86 (1C, s), 37.38 (1C, d,  $J$  = 217.3 Hz), 21.40 (1C, s), 16.63 (1C, d,  $J$  = 5.9 Hz), 16.46 (1C, d,  $J$  = 6.3 Hz).  $^{19}\text{F NMR}$  (377 MHz,  $\text{CDCl}_3$ )  $\delta$  -62.55 (s).  $^{31}\text{P NMR}$  (162 MHz,  $\text{CDCl}_3$ )  $\delta$  20.27. **HR-MS** (ESI+)  $m/z$  calcd for  $\text{C}_{24}\text{H}_{28}\text{F}_3\text{NO}_7\text{P}$   $[\text{M}+\text{H}]^+$  530.1550 found 530.1551. **IR** ( $\text{cm}^{-1}$ ) 2983, 2364, 1737, 1512, 1442, 1338, 1232, 1163, 1130, 1055, 1021, 977. **HPLC** Daicel Chiralpak IB, 250 mm,  $\varnothing$  4.6 mm, Heptane/Ethanol = 95/5, 1.0 mL/min,  $\lambda$  = 210 nm,  $t_{\text{minor}}$  = 7.51 min,  $t_{\text{major}}$  = 8.25 min.  $[\alpha]_{\text{D}}^{20}$  0.4 (c 1.00,  $\text{CH}_2\text{Cl}_2$ ).

**Compound 35** : ethyl (1*S*,2*R*)-2-  
(((benzyloxy)carbonyl)amino)-1-(3,4-dichlorophenyl)-2-  
(diethoxyphosphoryl)cyclopropane-1-carboxylate

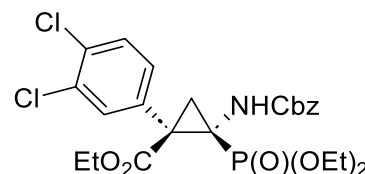

Compound **35** was prepared according to the general procedure D and obtained as an amorphous solid in 80% yield, 91.5:8.5 e.r..  $^1\text{H NMR}$  (400 MHz,  $\text{CDCl}_3$ )  $\delta$  7.56 (s, 1H), 7.37 (dd,  $J$  = 10.5, 7.2 Hz, 2H), 7.30 (d,  $J$  = 6.7 Hz, 4H), 7.16 (d,  $J$  = 5.6 Hz, 2H), 4.95 (dd,  $J$  = 47.7, 12.3 Hz, 2H), 4.76 (s, 1H), 4.22 – 4.10 (m, 6H), 2.53 (dd,  $J$  = 14.1, 7.0 Hz, 1H), 2.25 (t,  $J$  = 6.8 Hz, 1H), 1.36 (t,  $J$  = 7.1 Hz, 3H), 1.30 – 1.23 (m, 6H).  $^{13}\text{C NMR}$  (101 MHz,  $\text{CDCl}_3$ )  $\delta$  168.08 (1C, d,  $J$  = 3.7 Hz), 154.99 (1C, s), 133.99 (1C, s), 132.87 (1C, d,  $J$  = 2.4 Hz), 132.15 (1C, s), 130.72 (1C, s), 129.61 (1C, s), 128.64 (2C, s), 128.35 (1C, s), 127.90 (2C, s), 66.98 (1C, s), 63.55 (1C, d,  $J$  = 5.1 Hz), 63.15 (1C, d,  $J$  = 6.4 Hz), 62.33 (1C, s), 41.53 (1C, s), 37.40 (1C, d,  $J$  = 216.8 Hz), 21.29 (1C, s), 16.61 (1C, d,  $J$  = 6.0 Hz), 16.43 (1C, d,  $J$  = 6.3 Hz), 13.97 (1C, s).  $^{31}\text{P NMR}$  (162 MHz,  $\text{CDCl}_3$ )  $\delta$  20.27. **HR-MS** (ESI+)  $m/z$  calcd for  $\text{C}_{24}\text{H}_{29}^{35}\text{Cl}_2\text{NO}_7\text{P}$   $[\text{M}+\text{H}]^+$  544.1053 found 544.1057. **IR** ( $\text{cm}^{-1}$ ) 2983, 2364, 1728, 1470, 1300, 1224, 1047, 1018, 977. **HPLC** Daicel Chiralpak IB, 250 mm,  $\varnothing$  4.6 mm, Heptane/Ethanol = 97/3, 1.0 mL/min,  $\lambda$  = 210 nm,  $t_{\text{minor}}$  = 10.23 min,  $t_{\text{major}}$  = 11.14 min.  $[\alpha]_{\text{D}}^{20}$  +15.6 (c 1.00,  $\text{CH}_2\text{Cl}_2$ ).

## 5. Post-functionalization reactions

### **Compound 36**: dimethyl (1S,2S)-1-([1,1'-biphenyl]-4-yl)-2-(bis(tert-butoxycarbonyl)amino)cyclopropane-1,2-dicarboxylate

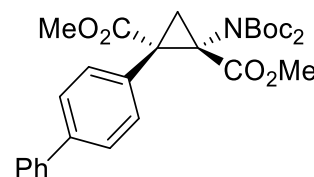

The cyclopropane **9** (20.0 mg; 34.8  $\mu\text{mol}$ ), phenyl boronic acid (5.1 mg; 41.7  $\mu\text{mol}$ ) and  $\text{K}_2\text{CO}_3$  (9.6 mg; 69.5  $\mu\text{mol}$ ) were dissolved in THF:H<sub>2</sub>O (1.0:0.3 mL). The solution was degassed with argon. Then, bistriphenylphosphinepalladium dichloride (1.2 mg; 1.7  $\mu\text{mol}$ ) was added and the mixture heated at 80 °C for 16 h. The aqueous phase was extracted with EtOAc (3 x 3.0 mL). The organic phase was dried, filtered and concentrated. The crude product was purified by column chromatography on silica gel (Pentane:Et<sub>2</sub>O 30%) to give the pure product as a colorless oil in 77% yield, 99:1 d.r., 98:2 e.r.. **<sup>1</sup>H NMR** (300 MHz, CDCl<sub>3</sub>)  $\delta$  7.63 – 7.57 (m, 2H), 7.54 (s, 4H), 7.43 (dd,  $J$  = 8.2, 6.7 Hz, 2H), 7.37 – 7.30 (m, 1H), 3.62 (s, 3H), 3.29 (s, 3H), 2.61 (d,  $J$  = 6.1 Hz, 1H), 2.28 (d,  $J$  = 6.1 Hz, 1H), 1.57 (s, 9H), 1.52 (s, 9H). **<sup>13</sup>C NMR** (75 MHz, CDCl<sub>3</sub>)  $\delta$  169.81 (s, 1C), 168.29 (s, 1C), 153.01 (s, 1C), 152.59 (s, 1C), 140.95 (s, 1C), 140.38 (s, 1C), 134.87 (s, 1C), 130.68 (s, 2C), 128.85 (s, 2C), 127.39 (s, 1C), 127.20 (s, 2C), 126.71 (s, 2C), 83.05 (s, 2C), 53.16 (s, 1C), 52.53 (s, 1C), 50.49 (s, 1C), 44.84 (s, 1C), 28.20 (s, 3C), 28.16 (s, 3C), 26.96 (s, 1C). **HR-MS** (ESI)  $m/z$  calcd for C<sub>29</sub>H<sub>35</sub>NO<sub>8</sub>K [M+K]<sup>+</sup> 564.2000, found 564.2006. **IR** (cm<sup>-1</sup>) 2981, 2952, 1731, 1708, 1488, 1435, 1366, 1275, 1230, 1165, 1116, 1076, 1014, 957. **HPLC** Daicel Chiralpak IE-3, 150 mm,  $\varnothing$  4.6 mm, Heptane/iso-propanol = 90/10, 1.0 mL/min,  $\lambda$  = 220 nm,  $t_{\text{major}}$  = 9.48 min,  $t_{\text{minor}}$  = 12.58 min.  **$[\alpha]_D^{20}$**  -14.1 (c 1.00, CHCl<sub>3</sub>).

### **Compound 37**: dimethyl (1S,2S)-1-((tert-butoxycarbonyl)amino)-2-(4-iodophenyl)cyclopropane-1,2-dicarboxylate

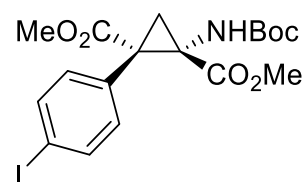

The cyclopropane **9** (20.0 mg; 34.8  $\mu\text{mol}$ ) was dissolved in MeCN (300.0  $\mu\text{L}$ ). The solution was cooled to 0 °C and Yb(OTf)<sub>3</sub> (2.2 mg; 3.5  $\mu\text{mol}$ ) was added. The mixture was stirred at 25 °C for 1 h. Water (2.0 mL) and CH<sub>2</sub>Cl<sub>2</sub> (2.0 mL) were added and the aqueous phase was extracted with CH<sub>2</sub>Cl<sub>2</sub> (2 x 2.0 mL). The organic phases were dried, filtered and concentrated. The crude product was purified by column chromatography on silica gel (Pentane:Et<sub>2</sub>O 30 to 50%) to give the pure product as a colorless oil in 73% yield, 99:1 d.r., 98.5:1.5 e.r.. **<sup>1</sup>H NMR** (300 MHz, CDCl<sub>3</sub>)  $\delta$  7.62 (d,  $J$  = 8.5 Hz, 2H), 7.15 (d,  $J$  = 8.2 Hz, 2H), 5.35 (s, 1H), 3.65 (s, 3H), 3.38 (s, 3H), 2.39 (d,  $J$  = 5.8 Hz, 1H), 2.24 (s, 1H), 1.46 (s, 9H). **<sup>13</sup>C NMR** (75 MHz, CDCl<sub>3</sub>)  $\delta$  168.87 (s, 2C), 155.66 (s, 1C), 137.45 (s, 2C), 134.54 (s, 1C), 132.19 (s, 2C), 94.06 (s, 1C), 80.70 (s, 1C), 53.27 (s, 1C), 52.64 (s, 2C), 44.92 (s, 1C), 28.37 (s, 3C), 24.78 (s, 1C). **HR-MS** (ESI)  $m/z$  calcd for C<sub>18</sub>H<sub>23</sub>NO<sub>6</sub>I [M+H]<sup>+</sup> 476.0570, found 476.0576. **IR** (cm<sup>-1</sup>) 3373, 3100, 2954, 2845, 1712, 1569, 1517, 1484, 1438, 1392, 1351, 1230, 1206, 1165, 1089, 1054, 1006, 953. **HPLC** Daicel Chiralpak IC-3, 150 mm,  $\varnothing$  4.6 mm, Heptane/iso-

propanol = 80/20, 1.0 mL/min,  $\lambda = 220$  nm,  $t_{\text{major}} = 7.42$  min,  $t_{\text{minor}} = 10.04$  min.  $[\alpha]_{\text{D}}^{20} -18.1$  (c 1.00,  $\text{CHCl}_3$ ).

**Compound 38**: ethyl (1*R*,2*S*,5*S*)-5-(bis(tert-butoxycarbonyl)amino)-2-(hydroxy(phenyl)methyl)-4-oxo-3-oxabicyclo[3.1.0]hexane-1-carboxylate

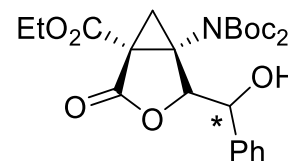

The cyclopropane **17** (15.0 mg; 31.0  $\mu\text{mol}$ ) was dissolved in acetone and  $\text{H}_2\text{O}$  (700.0  $\mu\text{L}$ ; 4:1). NMO (6.8 mg; 67.4  $\mu\text{mol}$ ) and  $\text{OsO}_4$  (9.4  $\mu\text{L}$ ; 0.9  $\mu\text{mol}$ , 4wt% in  $\text{H}_2\text{O}$ ) were added and the reaction was stirred at 25  $^\circ\text{C}$  for 16 h. The reaction was quenched and filtrated over celite. The organic phase was extracted with  $\text{CH}_2\text{Cl}_2$  (3 x 2.0 mL). The organic phases were dried, filtered and concentrated. The crude product was purified by column chromatography on silica gel (Pentane: $\text{Et}_2\text{O}$  40%) to give the pure product as a colorless oil in 63% yield, 99:1 d.r., 98.5:1.5 e.r..  $^1\text{H NMR}$  (300 MHz,  $\text{CDCl}_3$ )  $\delta$  7.53 – 7.29 (m, 5H), 5.18 (d,  $J = 6.5$  Hz, 1H), 4.79 (dd,  $J = 6.4, 3.5$  Hz, 1H), 4.06 – 3.65 (m, 2H), 2.51 (d,  $J = 3.5$  Hz, 1H), 2.46 (d,  $J = 6.8$  Hz, 1H), 2.23 (d,  $J = 6.9$  Hz, 1H), 1.54 (s, 9H), 1.42 (s, 9H), 1.03 (t,  $J = 7.1$  Hz, 3H).  $^{13}\text{C NMR}$  (75 MHz,  $\text{CDCl}_3$ )  $\delta$  170.22 (s, 1C), 165.69 (s, 1C), 150.86 (s, 1C), 150.68 (s, 1C), 138.26 (s, 1C), 128.88 (s, 1C), 128.72 (s, 2C), 126.77 (s, 2C), 84.51 (s, 1C), 84.03 (s, 1C), 80.75 (s, 1C), 74.59 (s, 1C), 61.98 (s, 1C), 50.13 (s, 1C), 37.89 (s, 1C), 28.11 (s, 3C), 27.82 (s, 3C), 23.53 (s, 1C), 13.86 (s, 1C).  $^1\text{H NMR}$  in  $\text{CDCl}_3/\text{D}_2\text{O}$  (9:1) and HSQC can be found in the spectra section, confirming the structure. **HR-MS** (ESI)  $m/z$  calcd for  $\text{C}_{25}\text{H}_{33}\text{NO}_9\text{K}$  [ $\text{M}+\text{K}$ ] $^+$  530.1792, found 530.1804. **IR** ( $\text{cm}^{-1}$ ) 3513, 2980, 2922, 2856, 1789, 1729, 1455, 1369, 1275, 1249, 1156, 1116, 1099, 1025, 998. **HPLC** Daicel Chiralpak IE-3, 150 mm,  $\varnothing$  4.6 mm, Heptane/iso-propanol = 80/20, 1.0 mL/min,  $\lambda = 220$  nm,  $t_{\text{major}} = 8.81$  min,  $t_{\text{minor}} = 11.91$  min.  $[\alpha]_{\text{D}}^{20} +1.8$  (c 1.00,  $\text{CHCl}_3$ ).

**Compound 39**: 2-ethyl 1-methyl (1*S*,2*R*)-1-(bis(tert-butoxycarbonyl)amino)-2-phenethylcyclopropane-1,2-dicarboxylate

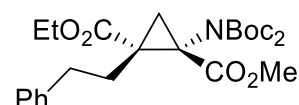

The cyclopropane **17** (22.0 mg; 50.0  $\mu\text{mol}$ ) was dissolved in  $\text{EtOAc}$  (1.5 mL).  $\text{Pd}(\text{OH})_2$  (3.2 mg; 4.5  $\mu\text{mol}$ ) was added. The atmosphere was filled with  $\text{H}_2$  and the mixture stirred at 25  $^\circ\text{C}$  for 24 h. The reaction was filtered over a pad of celite and concentrated to give the pure product as a colorless oil in 91% yield, 99:1 d.r., 96.6:3.5 e.r..  $^1\text{H NMR}$  (300 MHz,  $\text{CDCl}_3$ )  $\delta$  7.33 – 7.23 (m, 2H), 7.22 – 7.11 (m, 3H), 4.33 – 3.96 (m, 2H), 3.73 (s, 3H), 2.72 (dt,  $J = 11.3, 5.6$  Hz, 2H), 2.41 (ddd,  $J = 15.5, 10.3, 5.5$  Hz, 1H), 2.03 (ddd,  $J = 13.9, 10.3, 6.8$  Hz, 1H), 1.98 – 1.91 (m, 2H), 1.49 (s, 9H), 1.46 (s, 9H), 1.29 (t,  $J = 7.2$  Hz, 3H).  $^{13}\text{C NMR}$  (75 MHz,  $\text{CDCl}_3$ )  $\delta$  169.73 (s, 1C), 169.33 (s, 1C), 152.26 (s, 1C), 151.85 (s, 1C), 142.01 (s, 1C), 128.67 (s, 2C), 128.46 (s, 2C), 125.97 (s, 1C), 82.91 (s, 1C), 82.76 (s, 1C), 61.62 (s, 1C), 52.97 (s, 1C), 48.92 (s, 1C), 42.19 (s, 1C), 33.76 (s, 1C), 29.68 (s, 1C), 28.13 (s, 3C), 28.01 (s, 3C), 27.37 (s, 1C), 14.13

(s, 1C). **HR-MS** (ES)  $m/z$  calcd for  $C_{26}H_{37}NO_8K$   $[M+K]^+$  530.2156, found 530.2161. **IR** ( $cm^{-1}$ ) 2981, 2936, 2258, 1794, 1725, 1455, 1367, 1251, 1212, 1158, 1096, 1062, 1030, 912. **HPLC** Daicel Chiralpak IC-3, 150 mm,  $\varnothing$  4.6 mm, Heptane/iso-propanol = 90/10, 1.0 mL/min,  $\lambda$  = 220 nm,  $t_{major}$  = 5.08 min,  $t_{minor}$  = 22.11 min.  $[\alpha]_D^{20}$  +0.6 (c 1.00,  $CHCl_3$ ).

**Compound 40**: 2-ethyl 1-methyl (1*S*,2*S*)-1-(bis(tert-butoxycarbonyl)amino)-2-ethynylcyclopropane-1,2-dicarboxylate

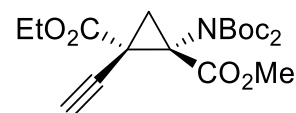

The cyclopropane **15** (15.0 mg; 31.0  $\mu$ mol) was dissolved in dry THF (200.0  $\mu$ L). TBAF (43.4  $\mu$ L; 43.4  $\mu$ mol, 1 M in THF) was added and the reaction stirred at 25  $^{\circ}C$  for 1 h. The solution was filtrated over a small pad of silica and eluted with  $Et_2O$  to give the pure product as a colorless oil in 96% yield, 99:1 d.r., 92:8 e.r..  **$^1H$  NMR** (300 MHz,  $CDCl_3$ )  $\delta$  4.32 – 3.99 (m, 2H), 3.77 (s, 3H), 2.52 (d,  $J$  = 6.3 Hz, 1H), 2.34 (s, 1H), 2.19 (d,  $J$  = 6.3 Hz, 1H), 1.49 (s, 9H), 1.48 (s, 9H), 1.30 (t,  $J$  = 7.2 Hz, 3H).  **$^{13}C$  NMR** (75 MHz,  $CDCl_3$ )  $\delta$  167.27 (s, 1C), 166.50 (s, 1C), 151.81 (s, 1C), 151.21 (s, 1C), 83.45 (s, 1C), 83.32 (s, 1C), 77.77 (s, 1C), 72.68 (s, 1C), 62.70 (s, 1C), 52.99 (s, 1C), 51.39 (s, 1C), 33.80 (s, 1C), 29.81 (s, 1C), 28.13 (s, 3C), 27.95 (s, 3C), 14.06 (s, 1C). **HR-MS** (ESI)  $m/z$  calcd for  $C_{20}H_{30}NO_8$   $[M+H]^+$  412.1971, found 412.1963. **IR** ( $cm^{-1}$ ) 3293, 3262, 2984, 2918, 2850, 1743, 1727, 1458, 1430, 1395, 1369, 1340, 1285, 1250, 1208, 1121, 1088, 1065, 1034, 1015, 967. **HPLC** Daicel Chiralpak IB-3, 150 mm,  $\varnothing$  4.6 mm, Heptane/iso-propanol = 98/2, 15  $^{\circ}C$ , 1.0 mL/min,  $\lambda$  = 220 nm,  $t_{major}$  = 7.26 min,  $t_{minor}$  = 8.07 min.  $[\alpha]_D^{20}$  -6.2 (c 1.00,  $CHCl_3$ ).

## 6. NMR spectra

**Compound 1** : 2-(tert-butyl) 1-methyl (1*S*,2*R*)-1-(bis(tert-butoxycarbonyl)amino)-2-cyanocyclopropane-1,2-dicarboxylate

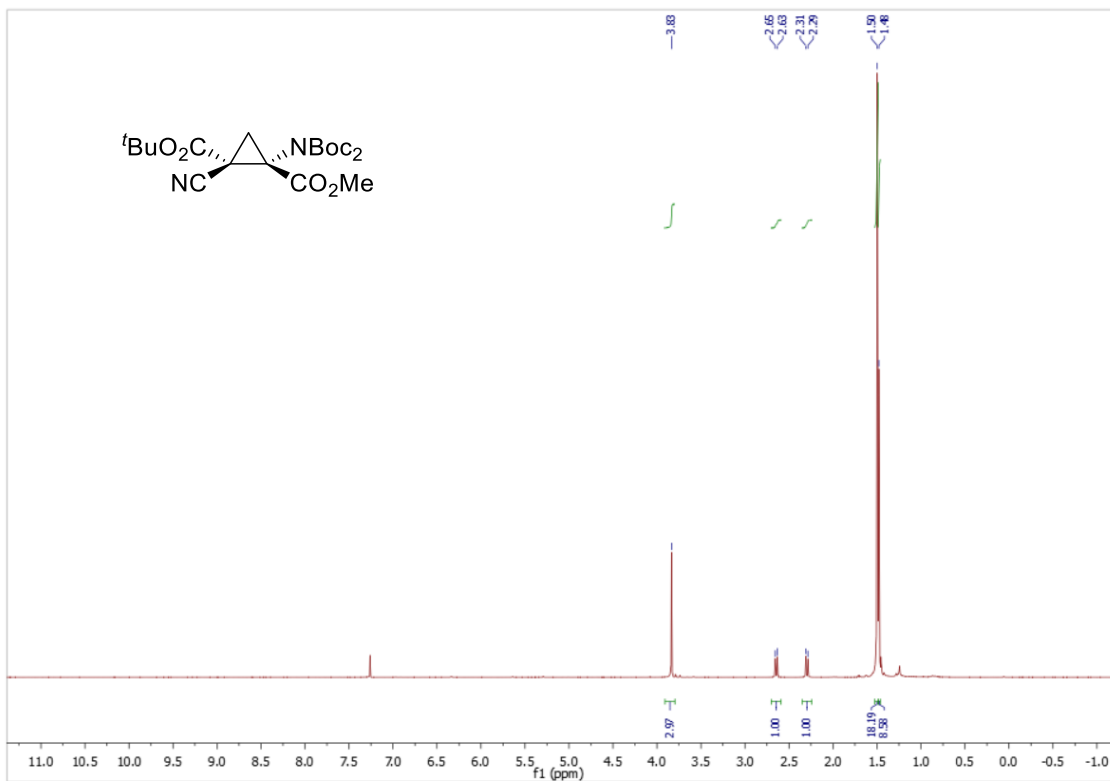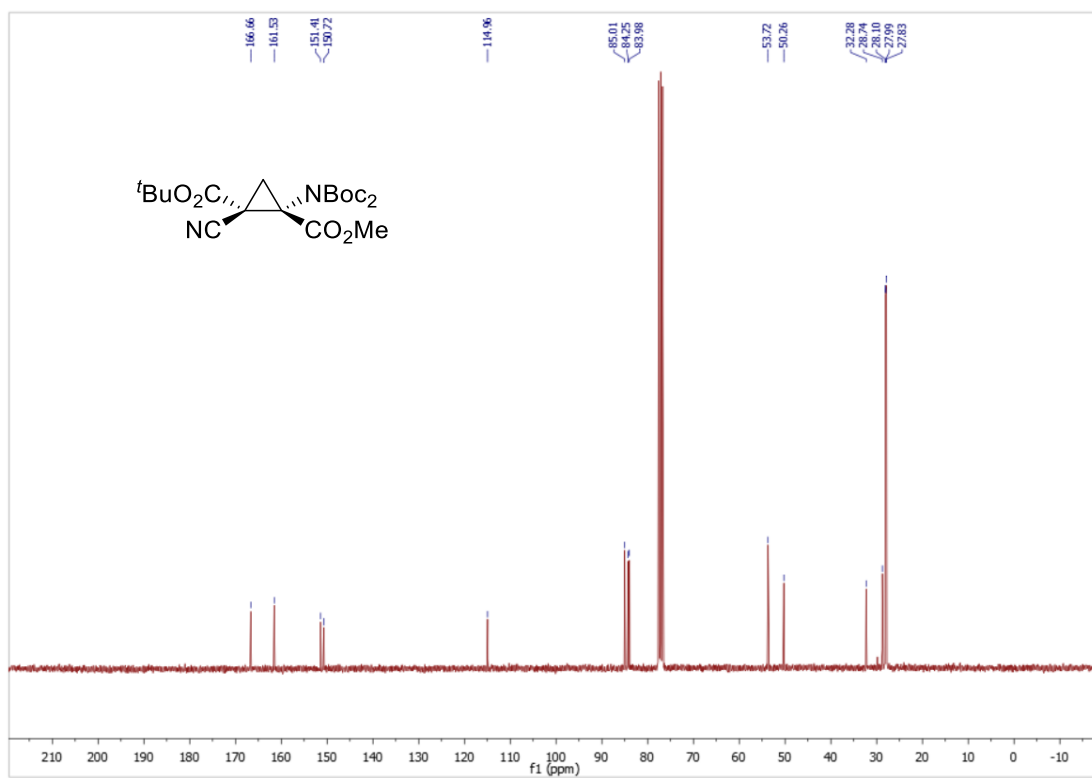

**Compound 2**: methyl (1*S*,2*R*)-1-(bis(tert-butoxycarbonyl)amino)-2-cyano-2-(4-methoxybenzoyl)cyclopropane-1-carboxylate

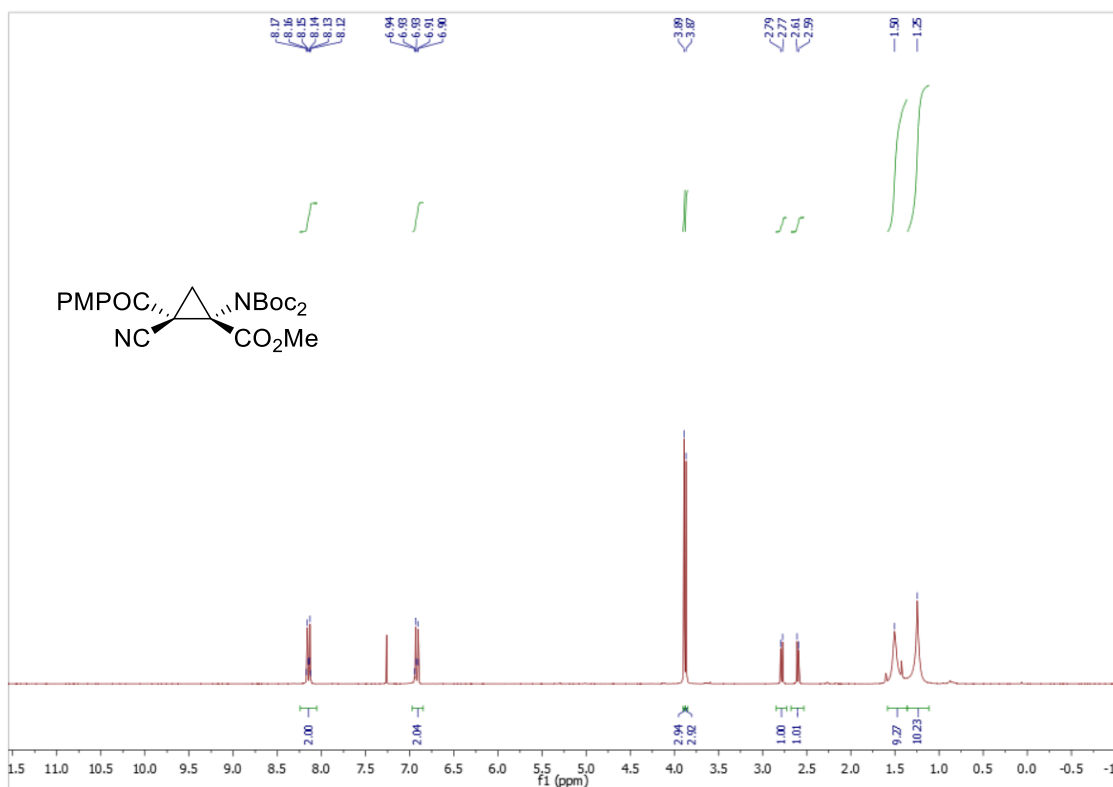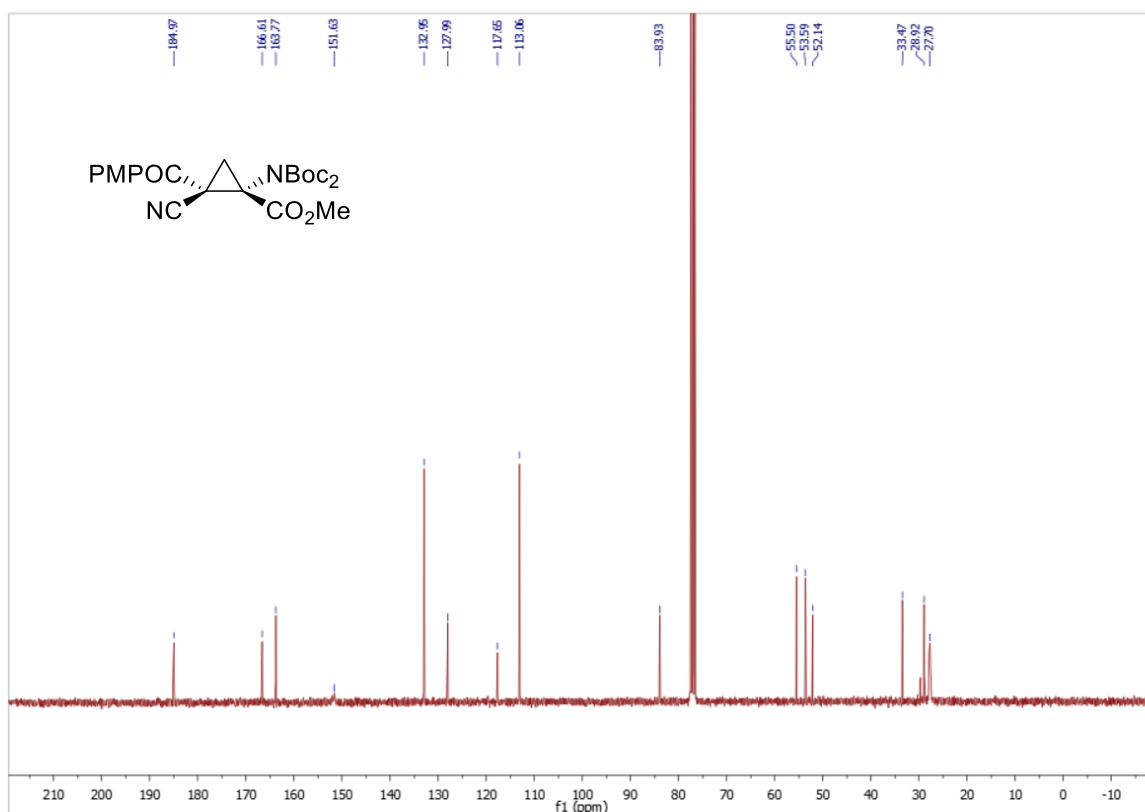

**Compound 3**: methyl (1*S*,2*R*)-1-(bis(tert-butoxycarbonyl)amino)-2-cyano-2-(methoxy(methyl)carbamoyl)cyclopropane-1-carboxylate

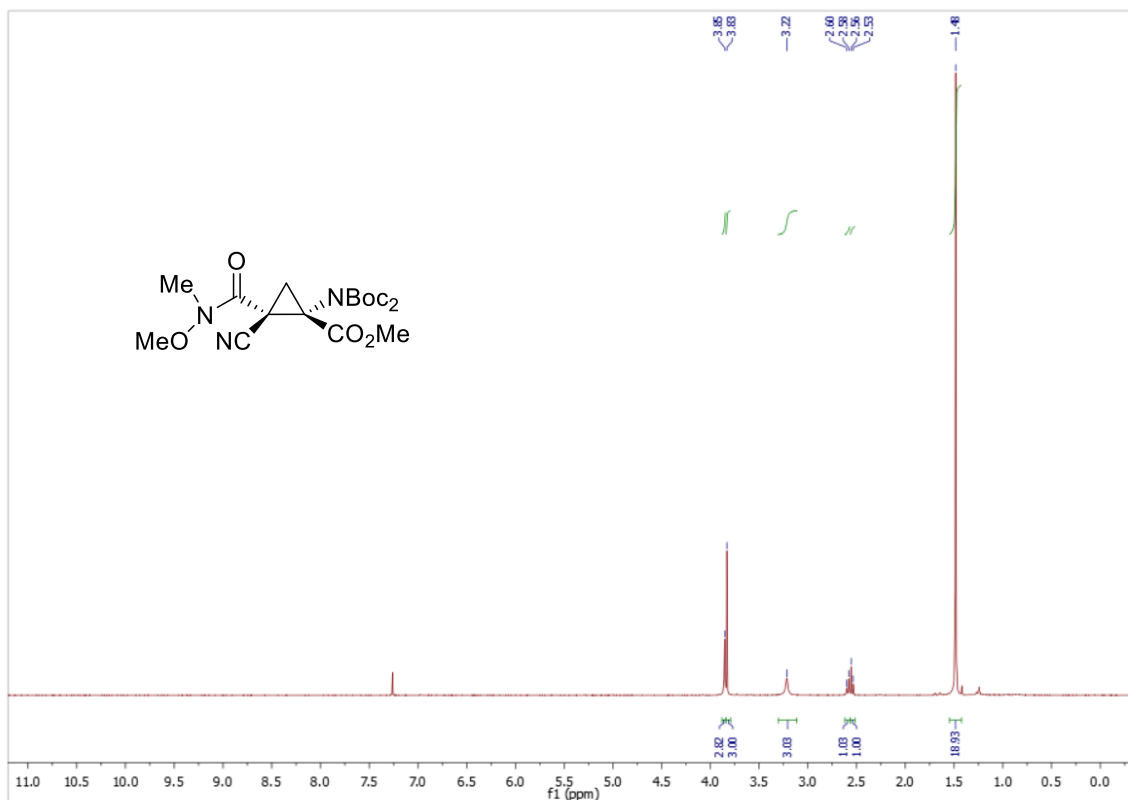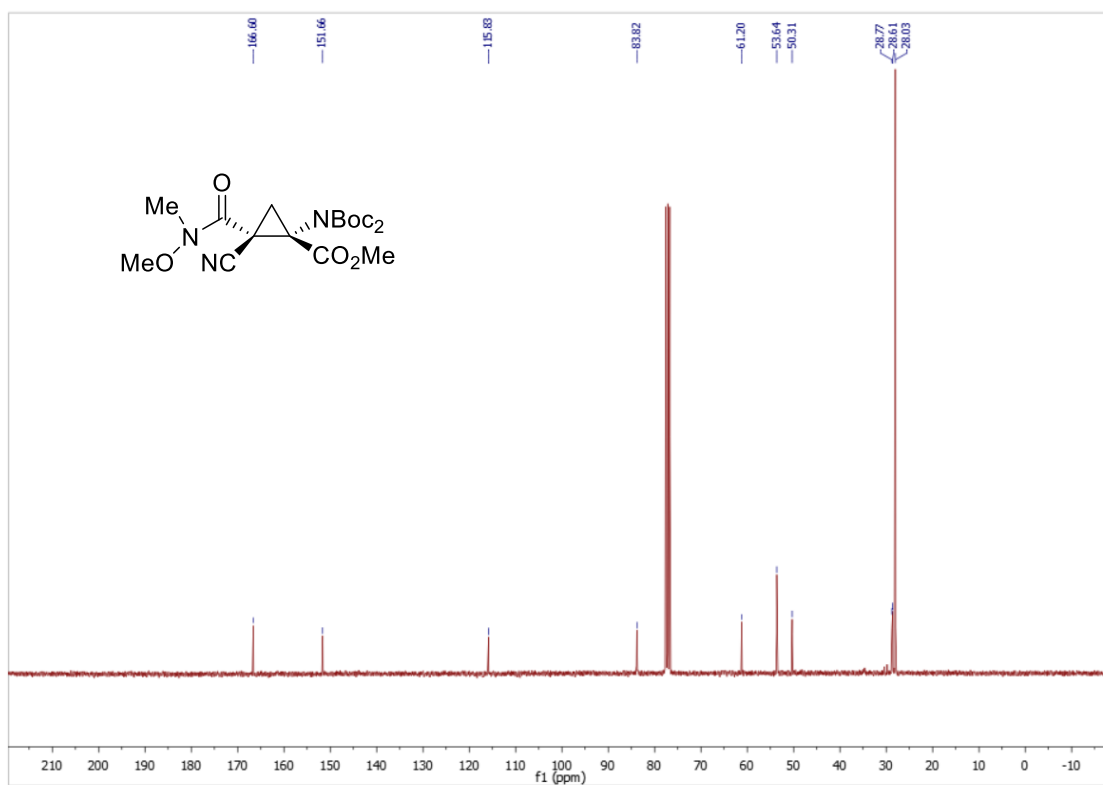

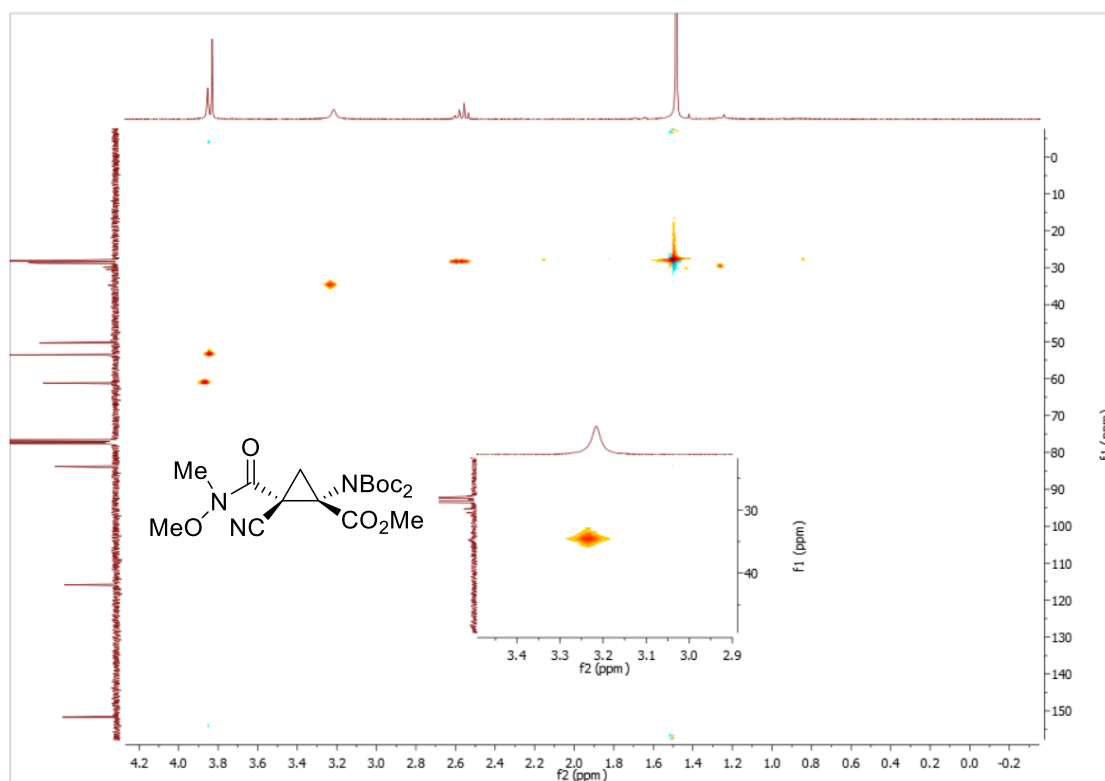

**Compound 4** : methyl (1*S*,2*R*)-1-(bis(tert-butoxycarbonyl)amino)-2-(2-ethoxy-2-oxoacetyl)cyclopropane-1-carboxylate

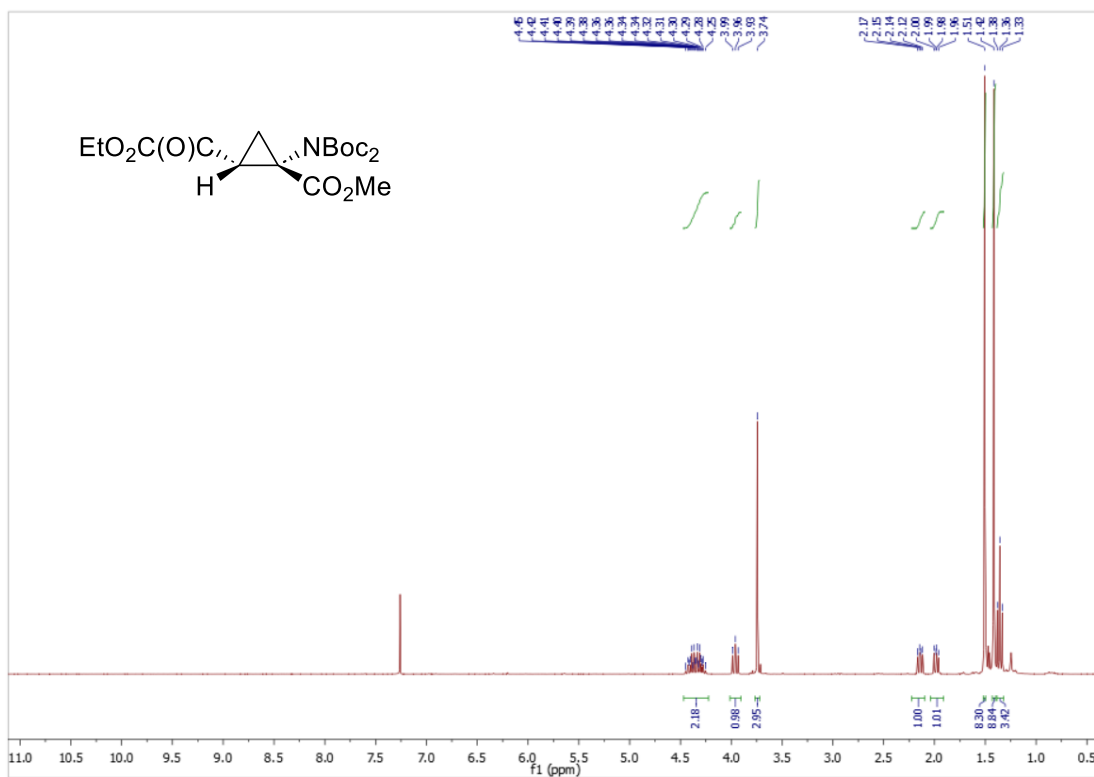



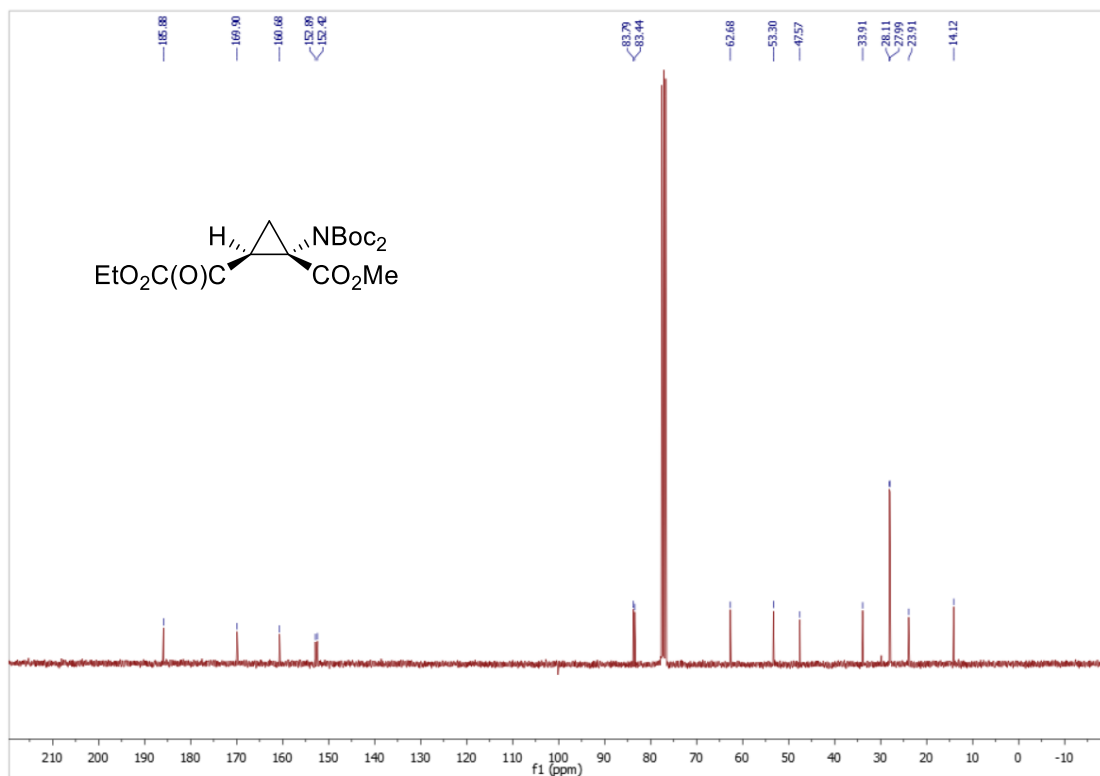

**Compound 5**: dimethyl (1S,2S)-1-(bis(tert-butoxycarbonyl)amino)-2-phenylcyclopropane-1,2-dicarboxylate

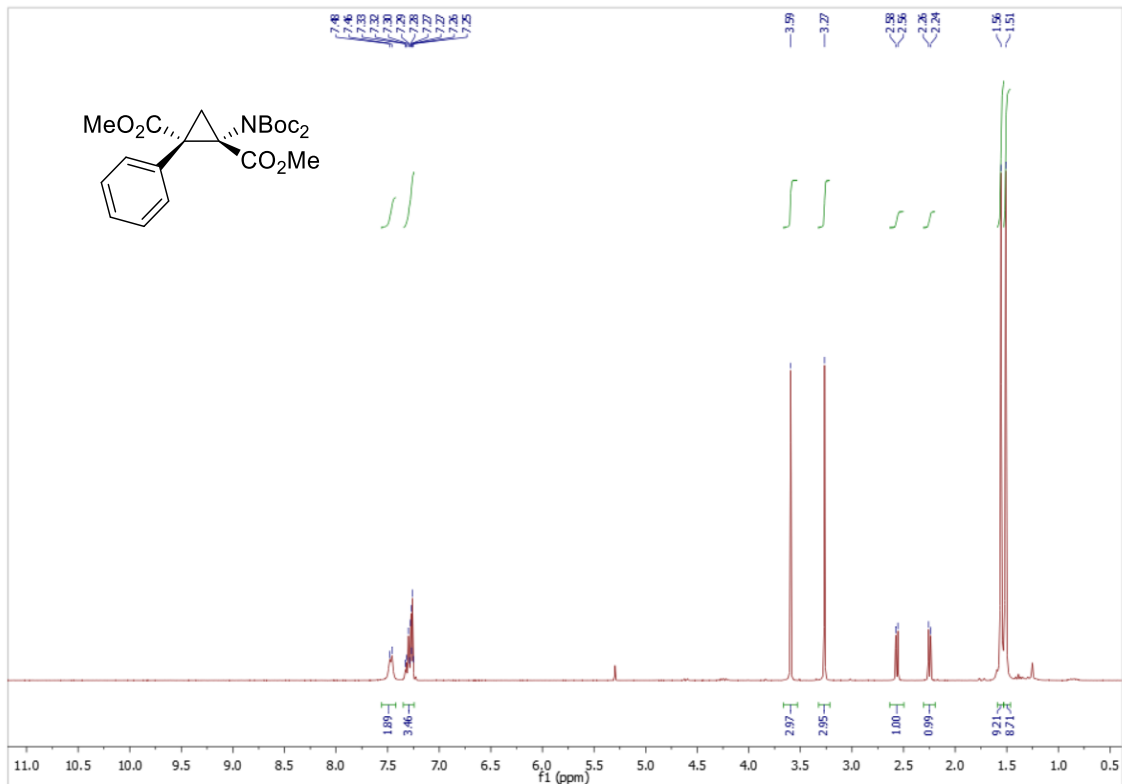

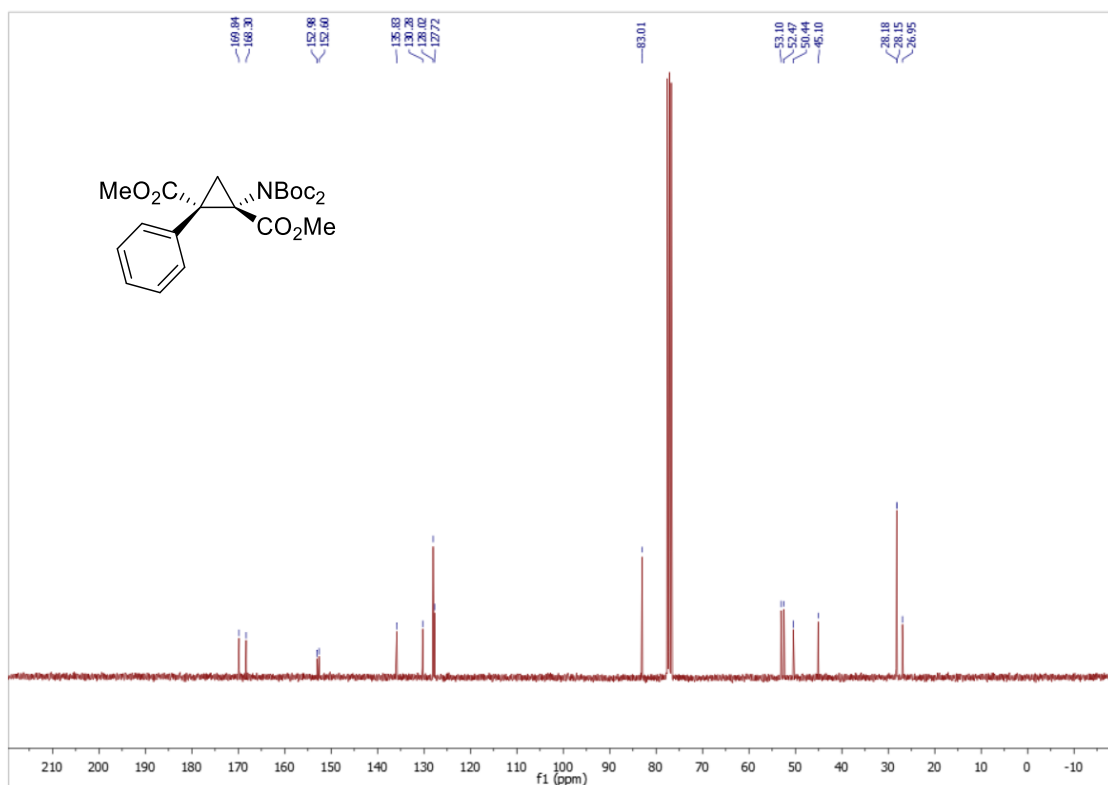

**Compound 6**: dimethyl (1S,2S)-1-(bis(tert-butoxycarbonyl)amino)-2-(4-fluorophenyl)cyclopropane-1,2-dicarboxylate

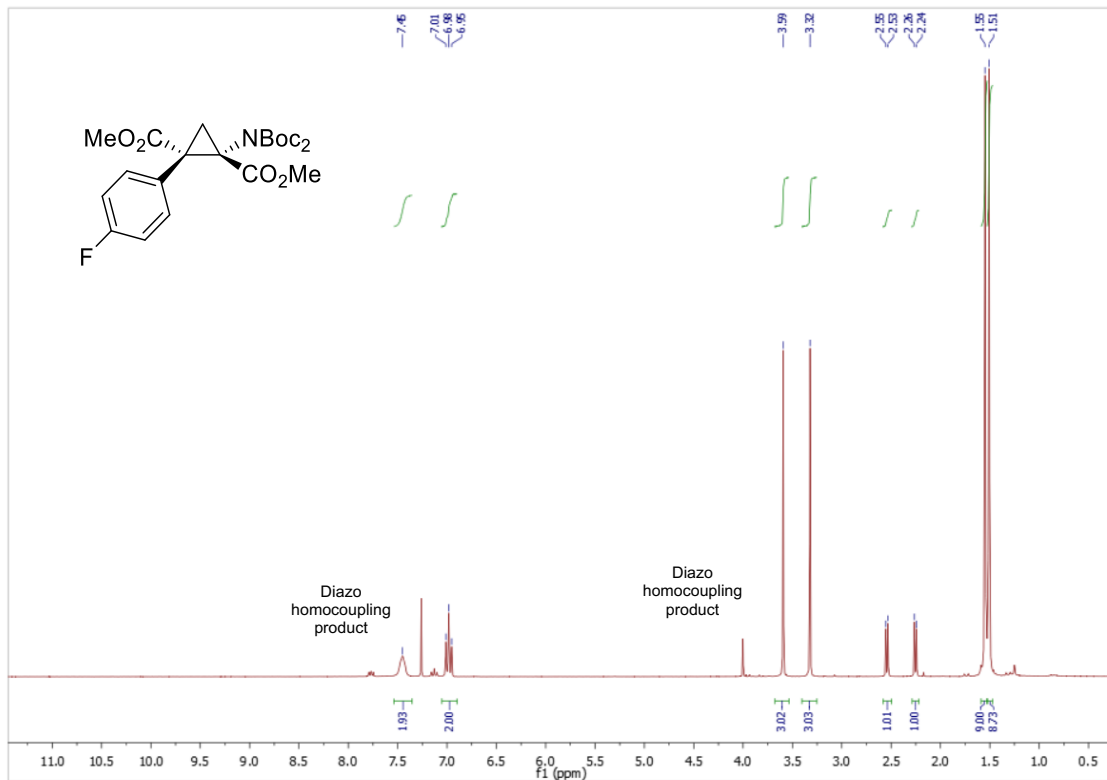

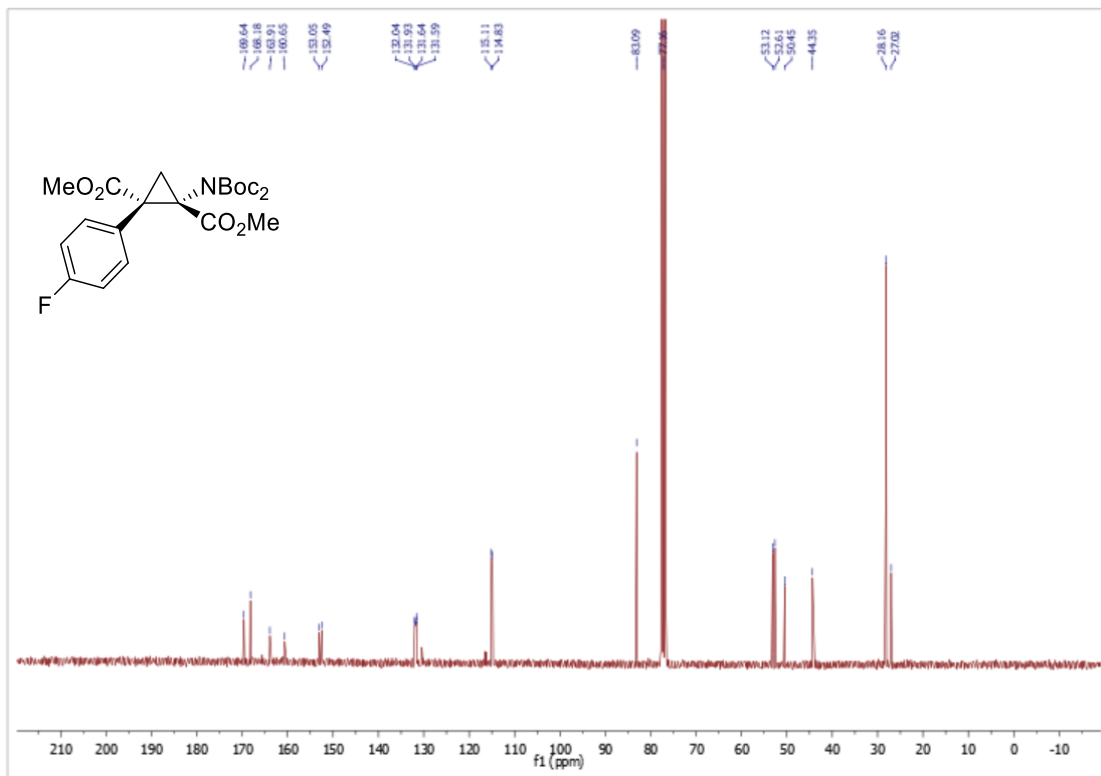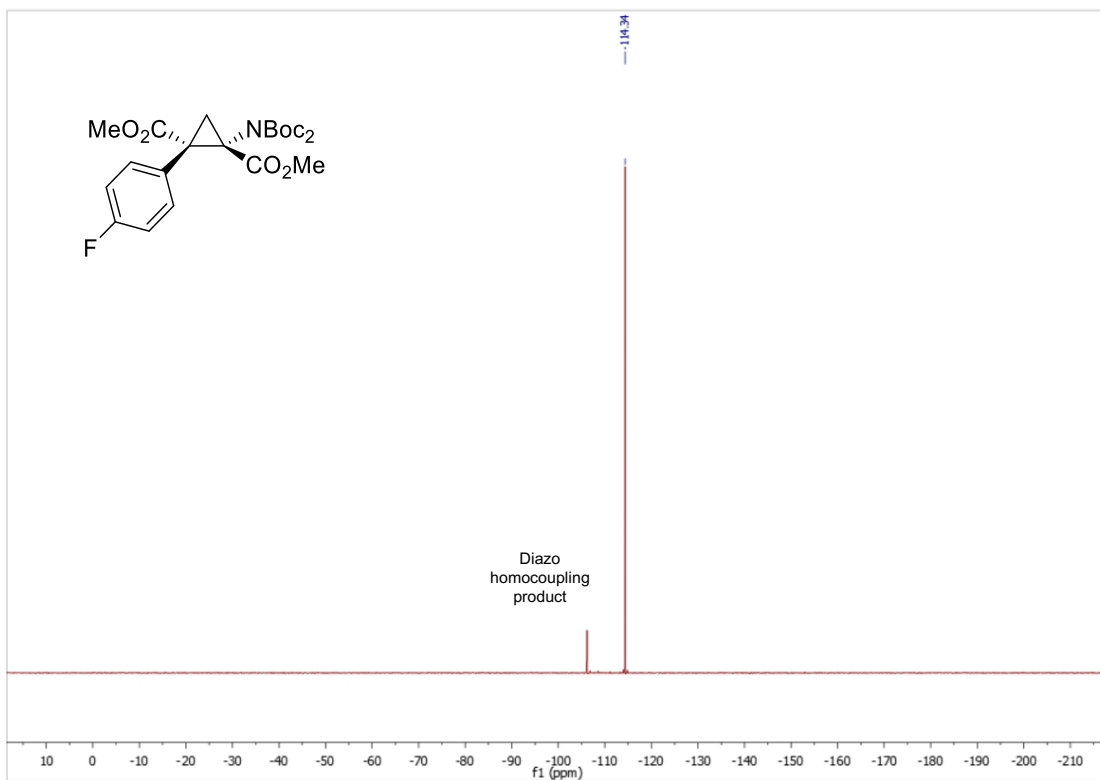

**Compound 7**: dimethyl (1*S*,2*S*)-1-(bis(tert-butoxycarbonyl)amino)-2-(4-chlorophenyl)cyclopropane-1,2-dicarboxylate

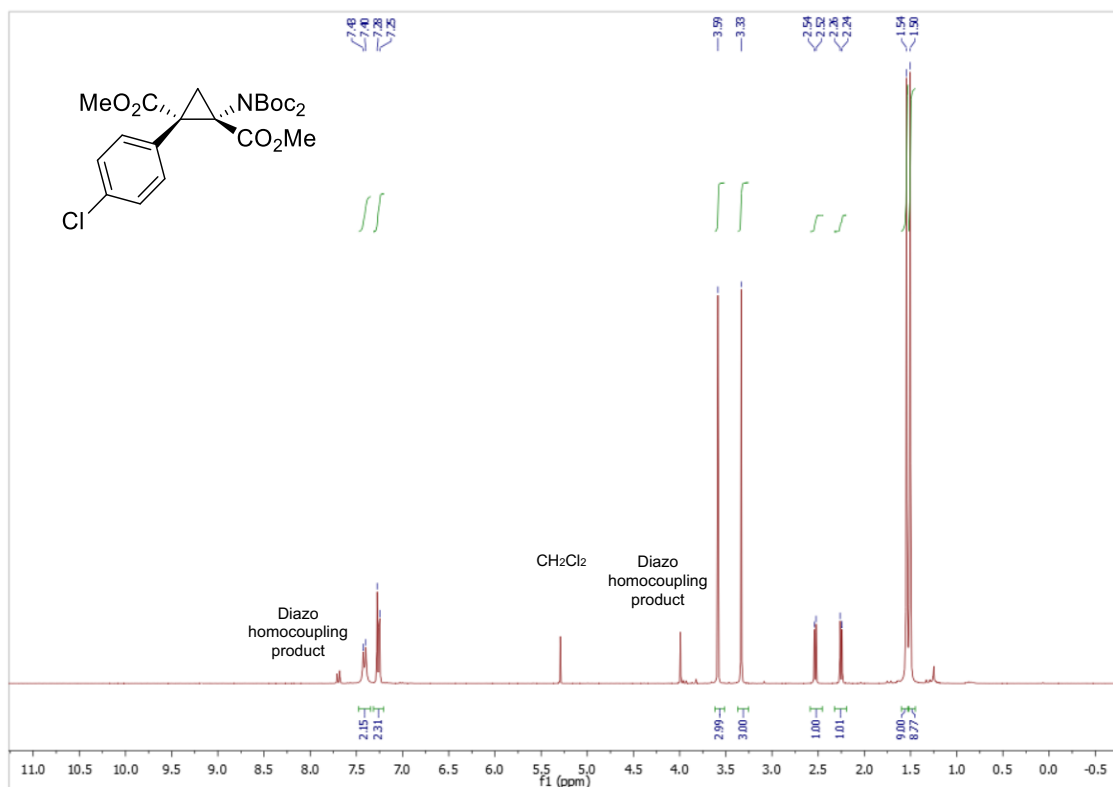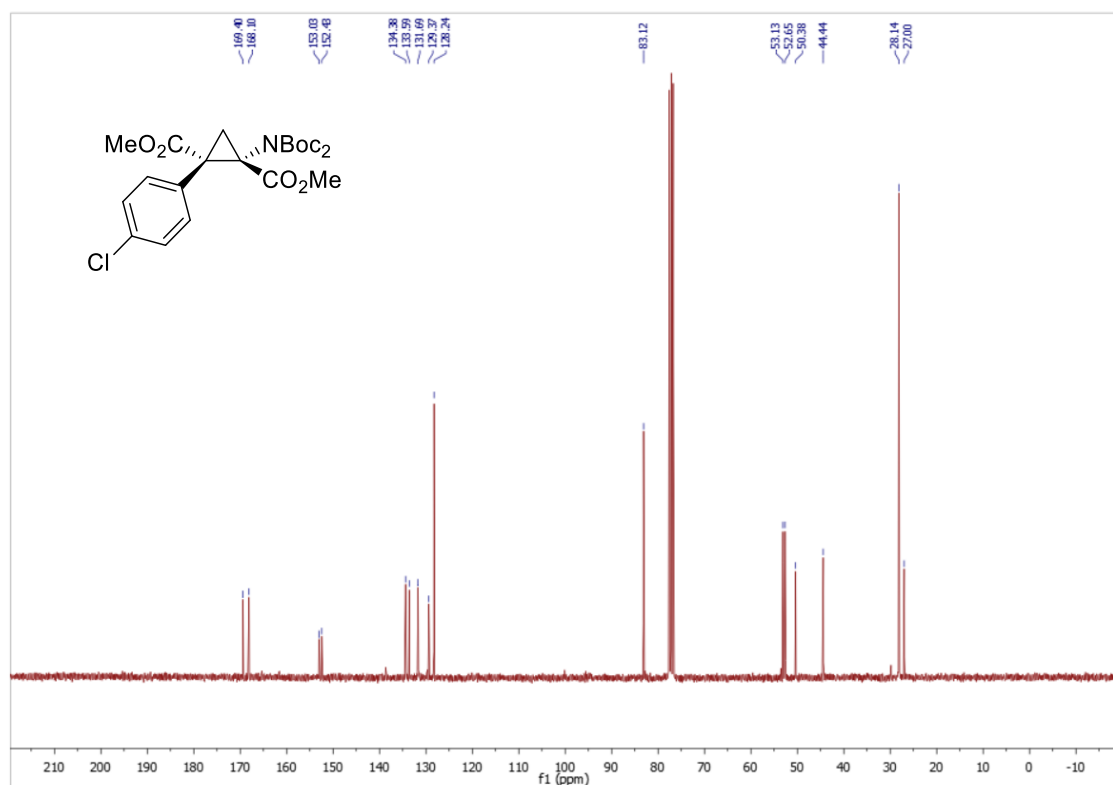

**Compound 8**: 1-ethyl 2-methyl (1S,2S)-1-(4-bromophenyl)-2-(bis(tert-butoxycarbonyl)amino)cyclopropane-1,2-dicarboxylate

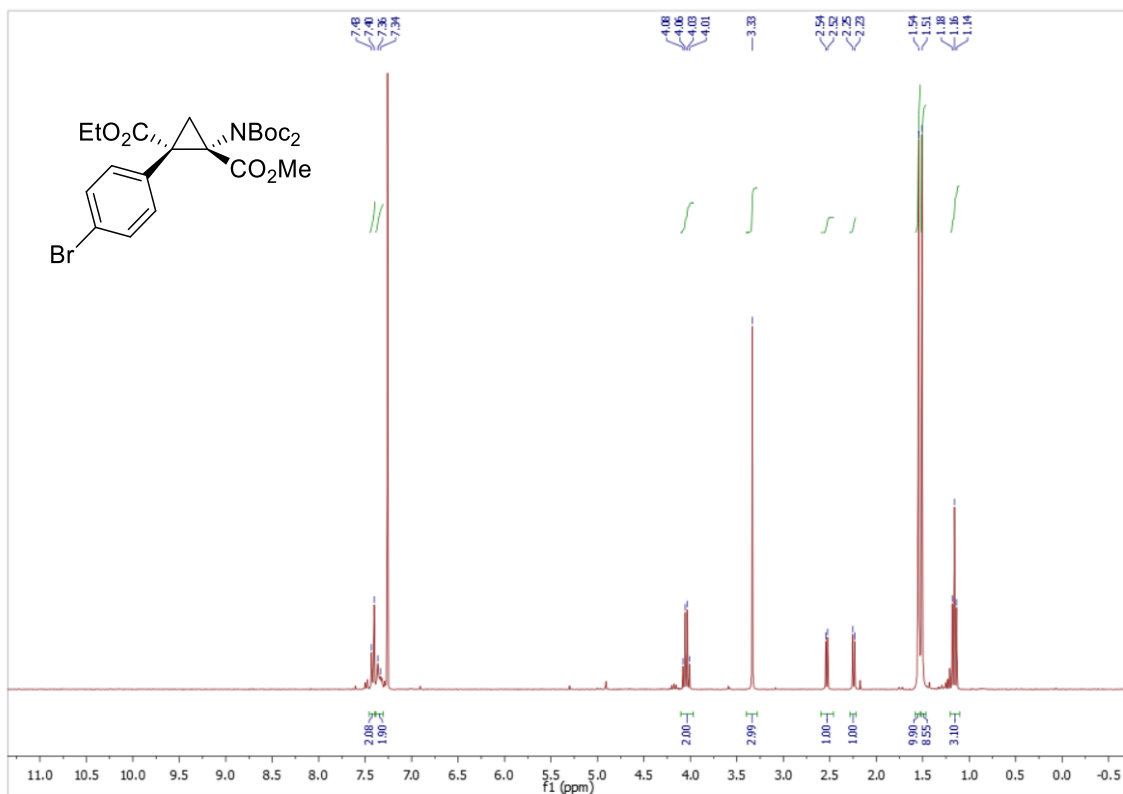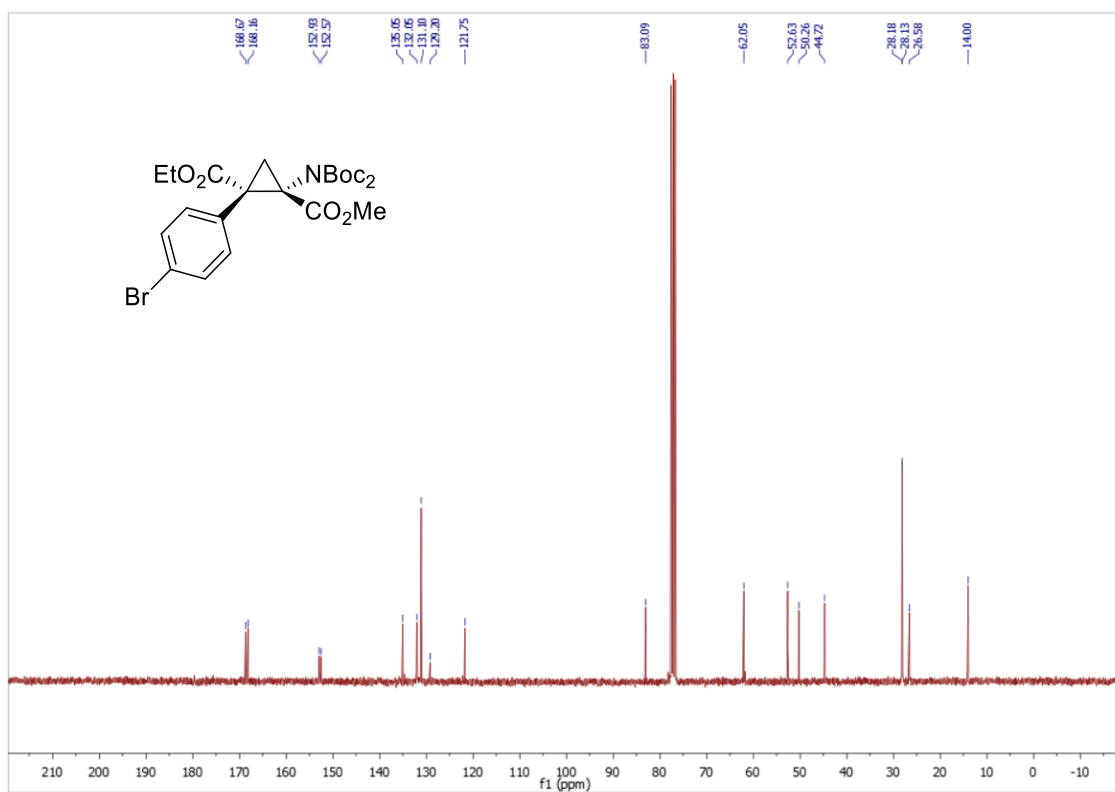

**Compound 9**: dimethyl (1*S*,2*S*)-1-(bis(tert-butoxycarbonyl)amino)-2-(4-iodophenyl)cyclopropane-1,2-dicarboxylate

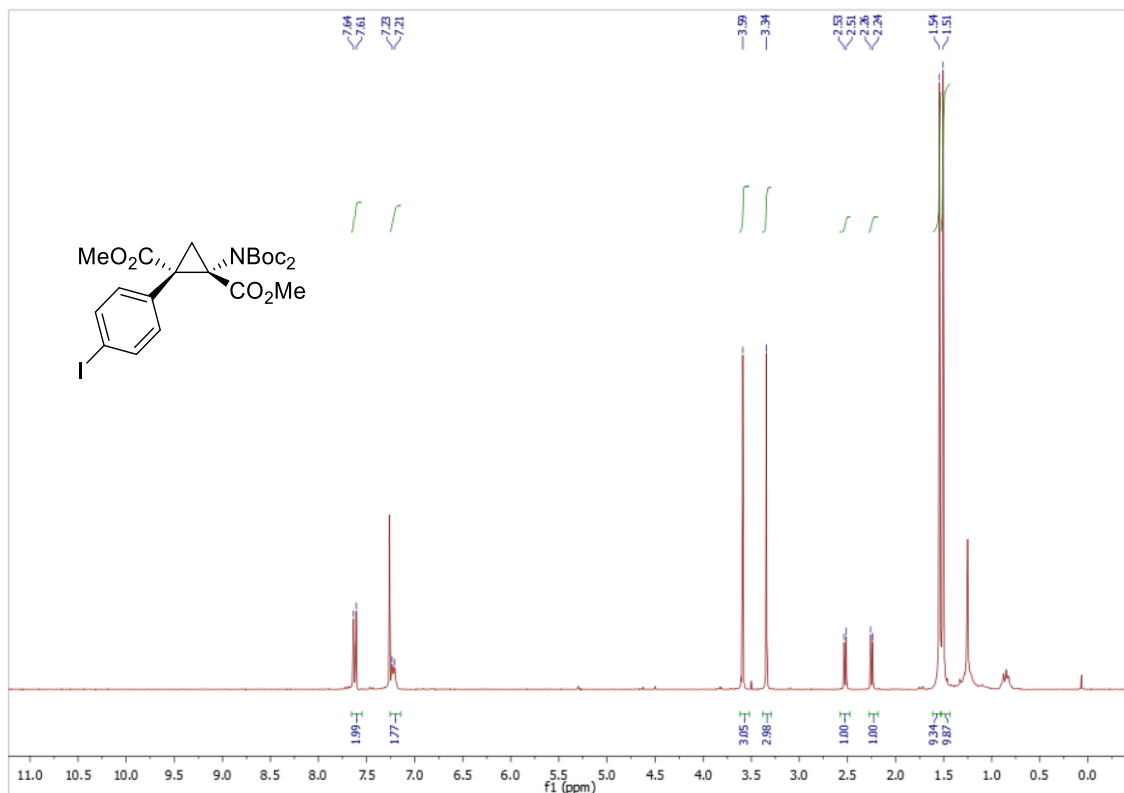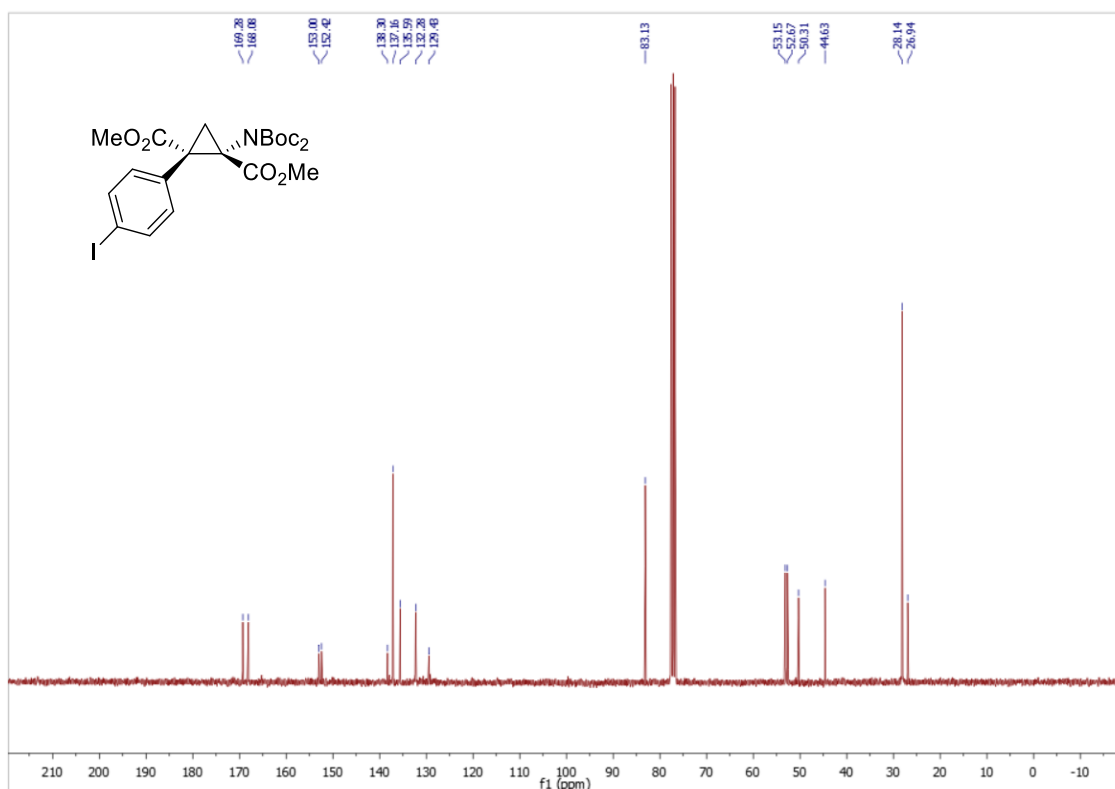

**Compound 10** : dimethyl (1*S*,2*S*)-1-(bis(tert-butoxycarbonyl)amino)-2-(4-(trifluoromethyl)phenyl)cyclopropane-1,2-dicarboxylate

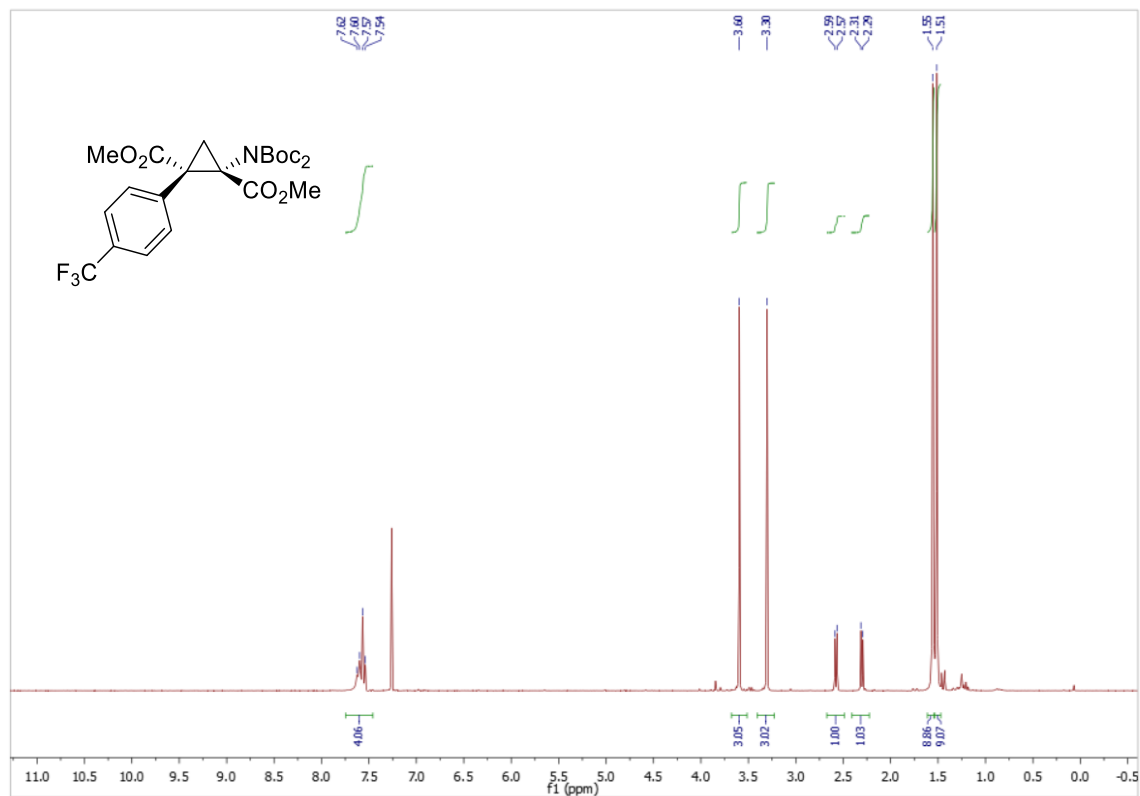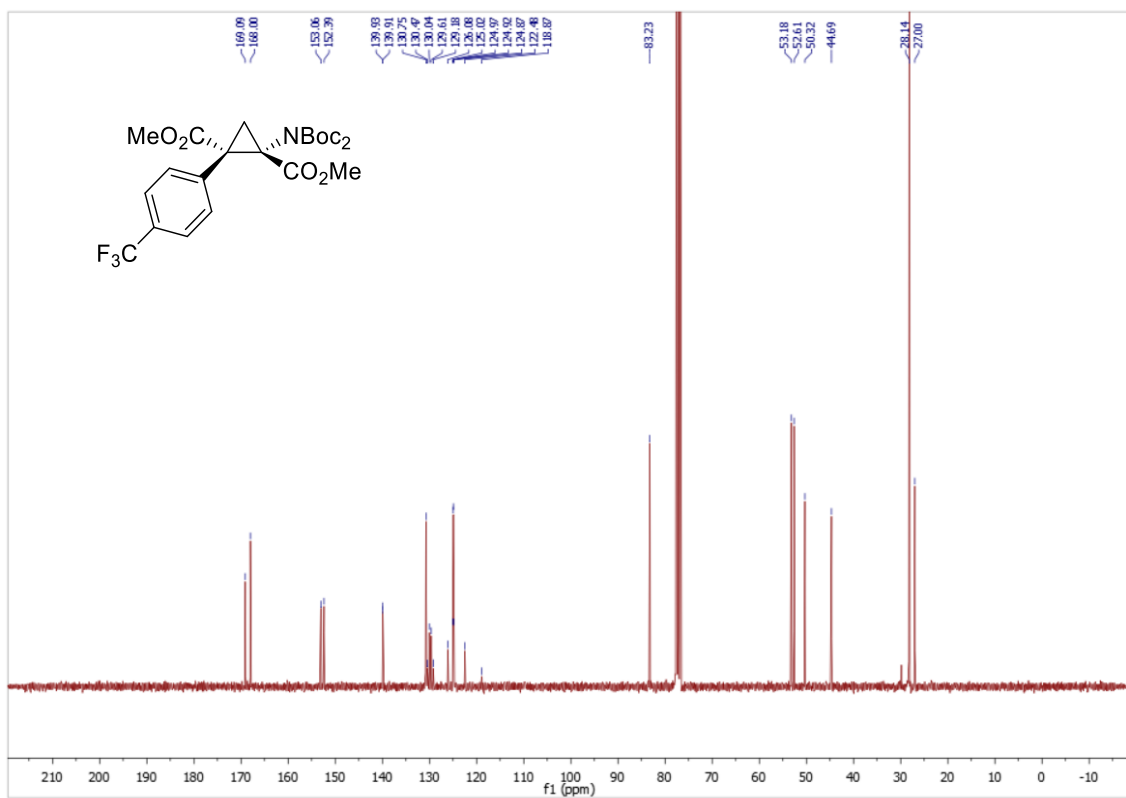

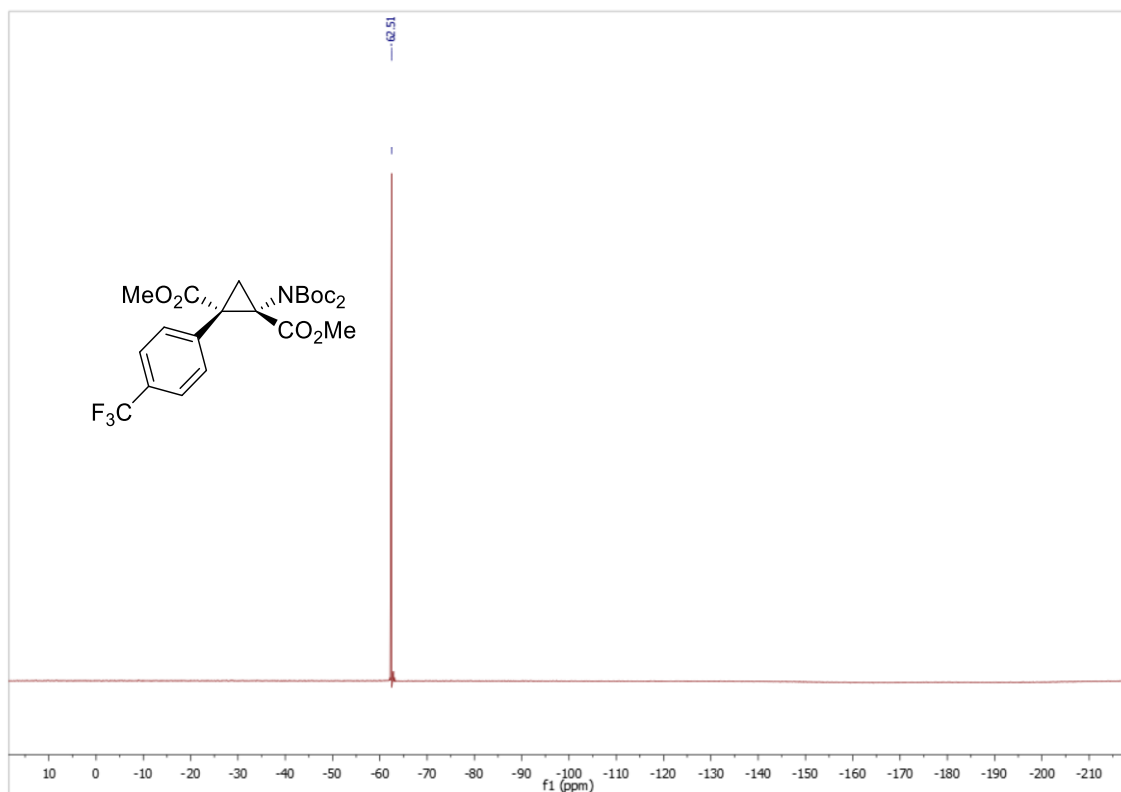

**Compound 11**: 2-ethyl 1-methyl (1*S*,2*S*)-1-(bis(tert-butoxycarbonyl)amino)-2-(4-nitrophenyl)cyclopropane-1,2-dicarboxylate

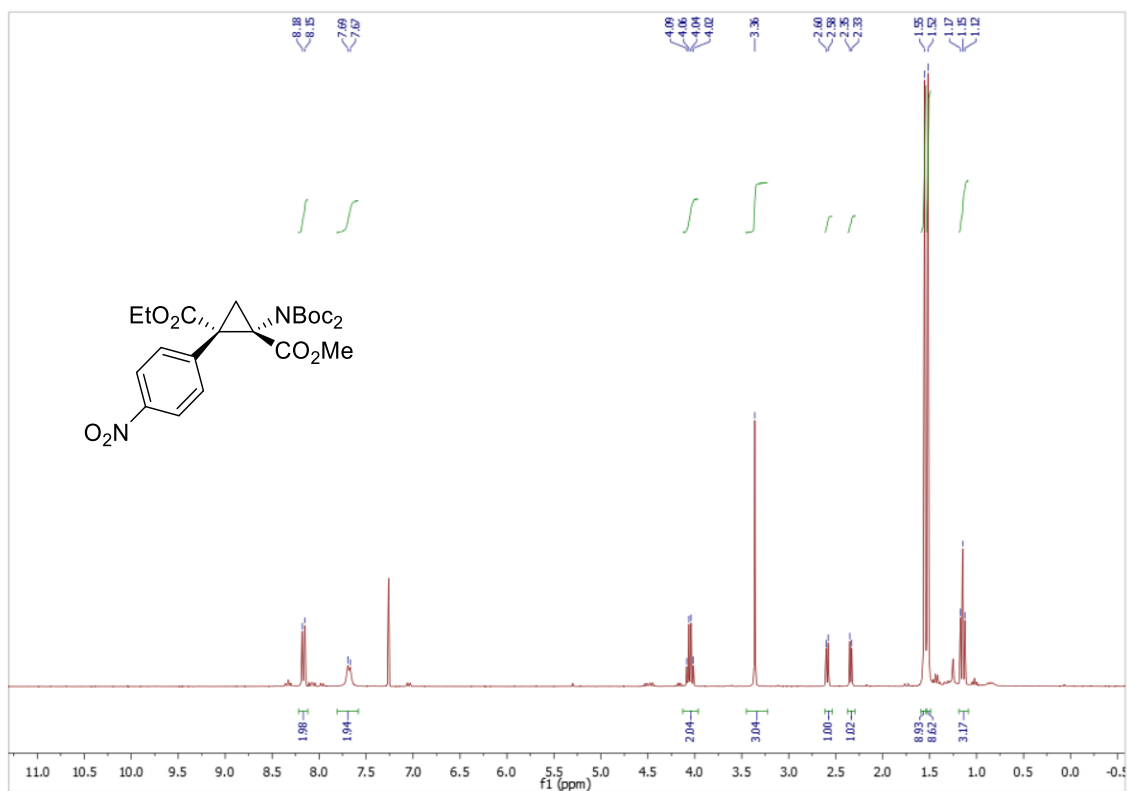



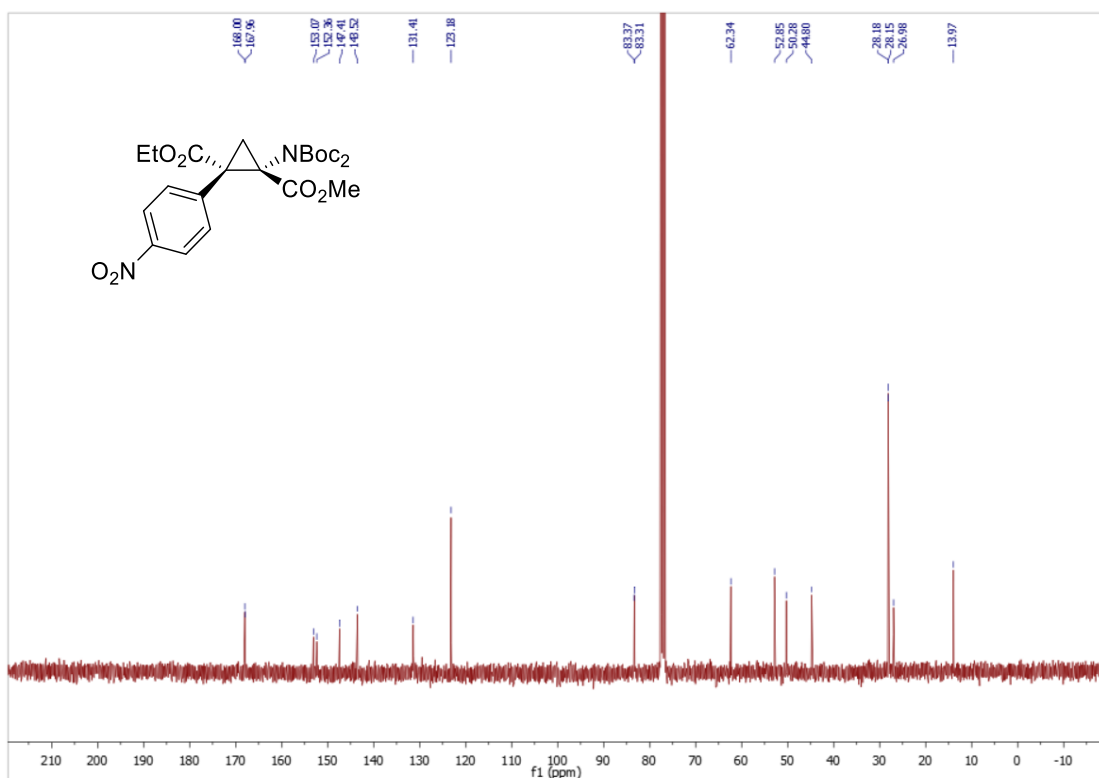

**Compound 12:** dimethyl (1S,2S)-1-(bis(tert-butoxycarbonyl)amino)-2-(4-(trifluoromethoxy)phenyl)cyclopropane-1,2-dicarboxylate

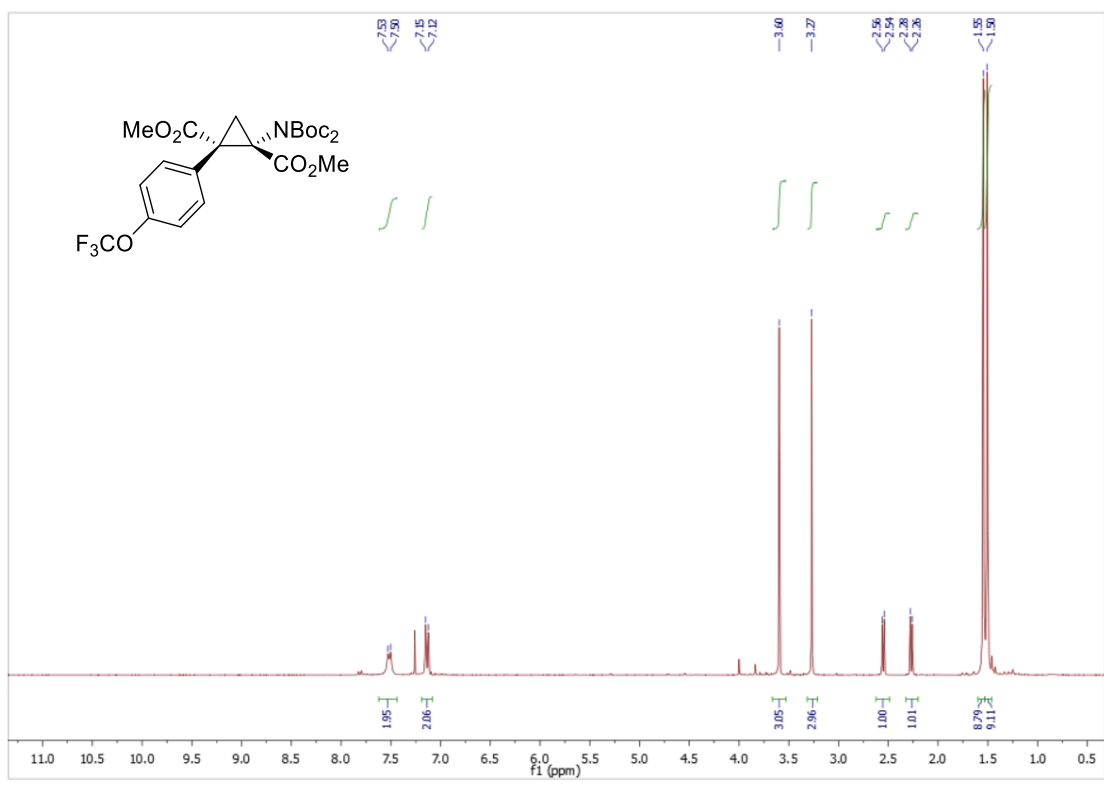

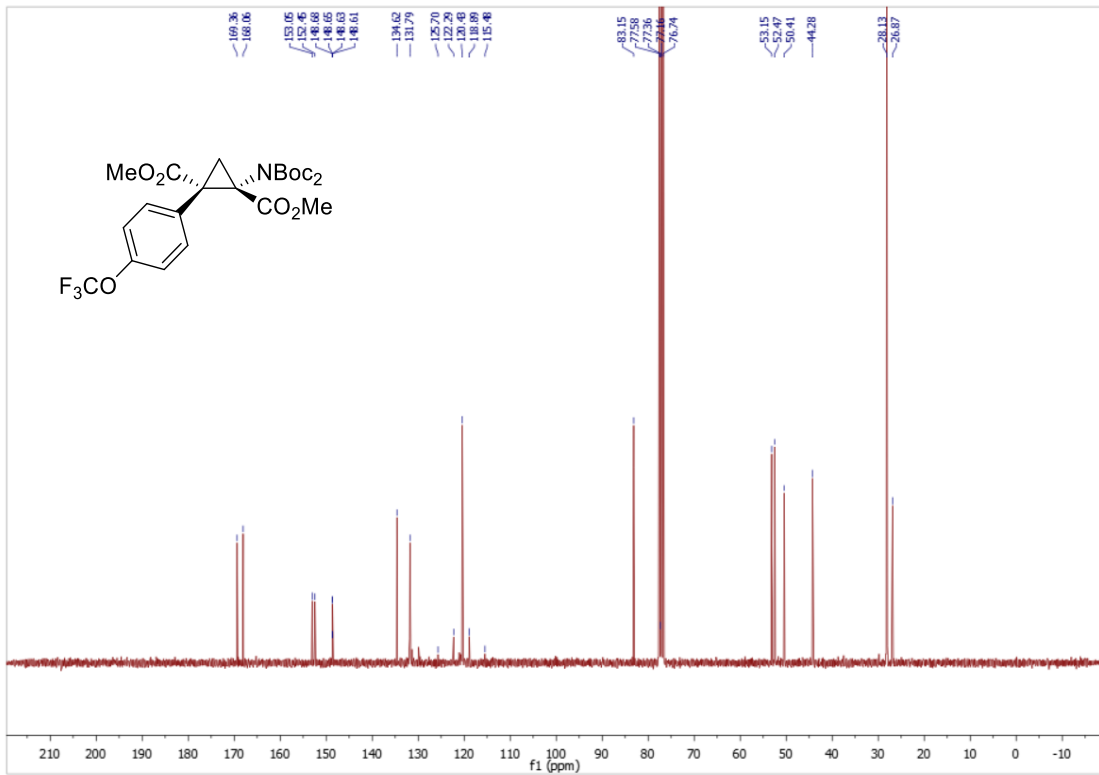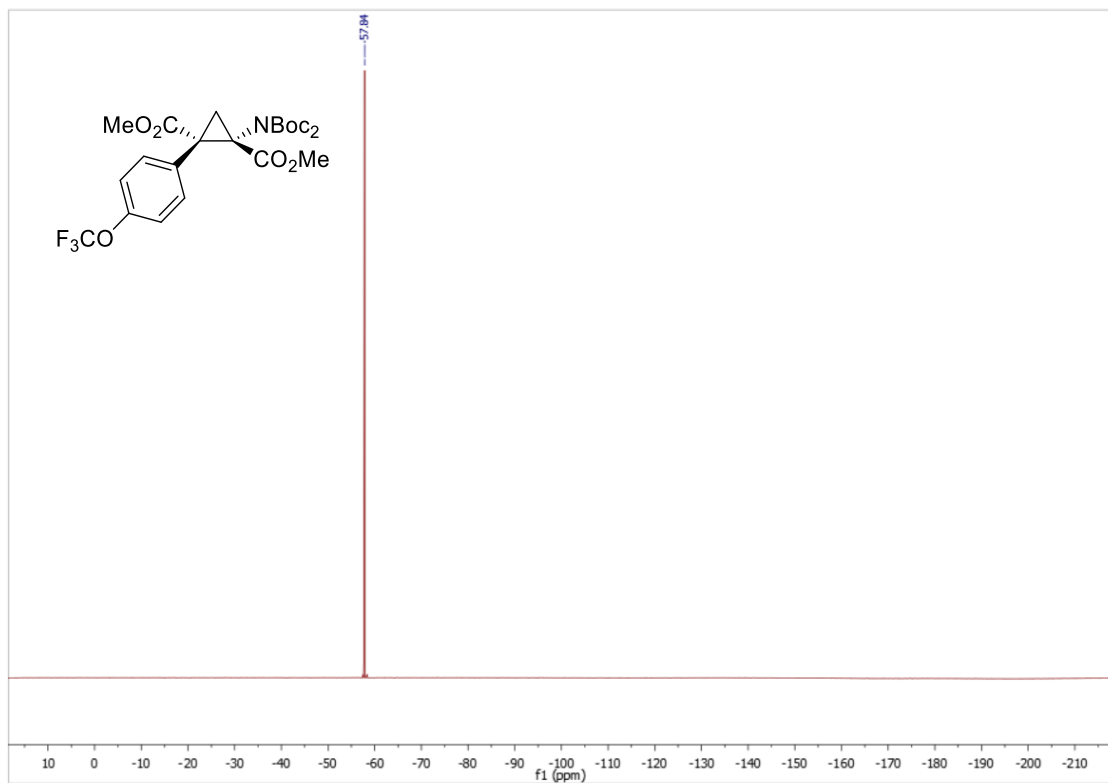

**Compound 13**: dimethyl (1*S*,2*S*)-1-(bis(tert-butoxycarbonyl)amino)-2-(3-(trifluoromethyl)phenyl)cyclopropane-1,2-dicarboxylate

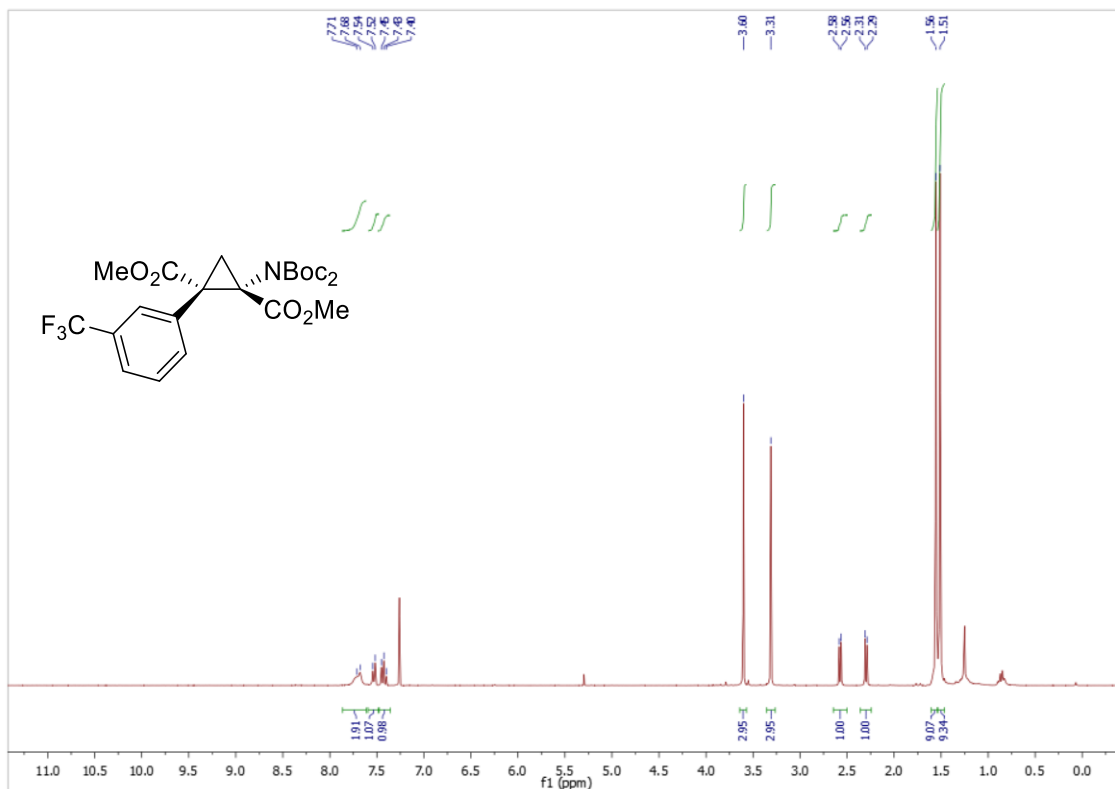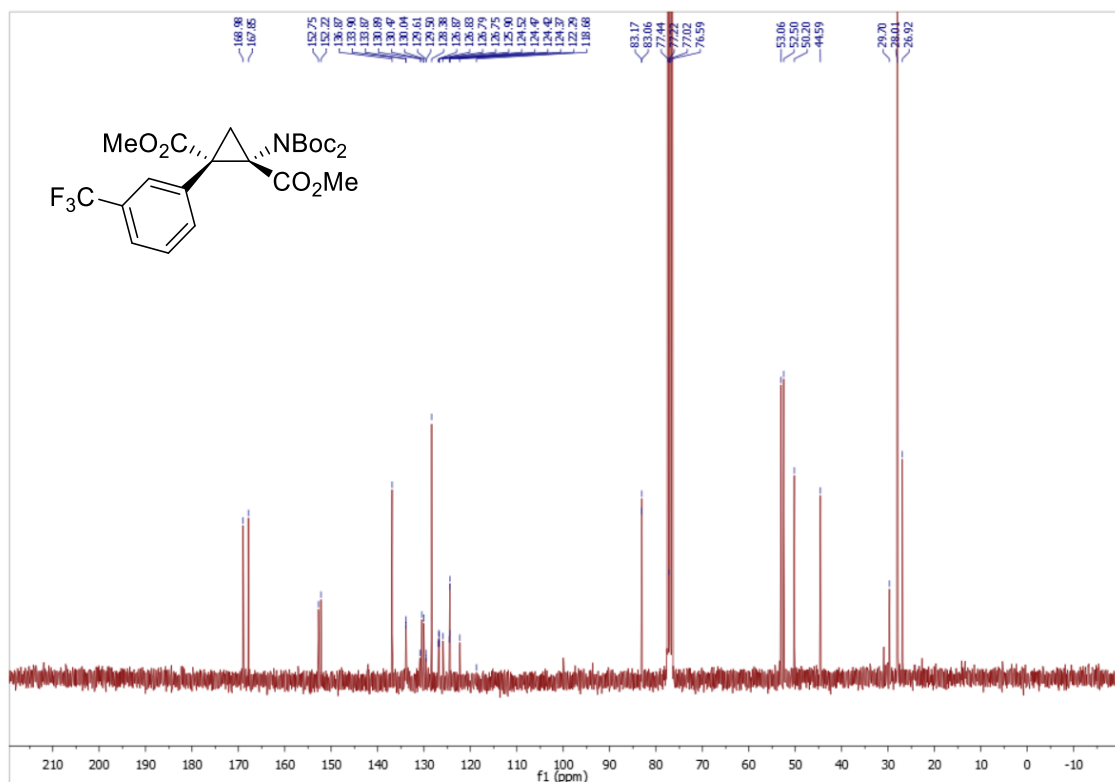

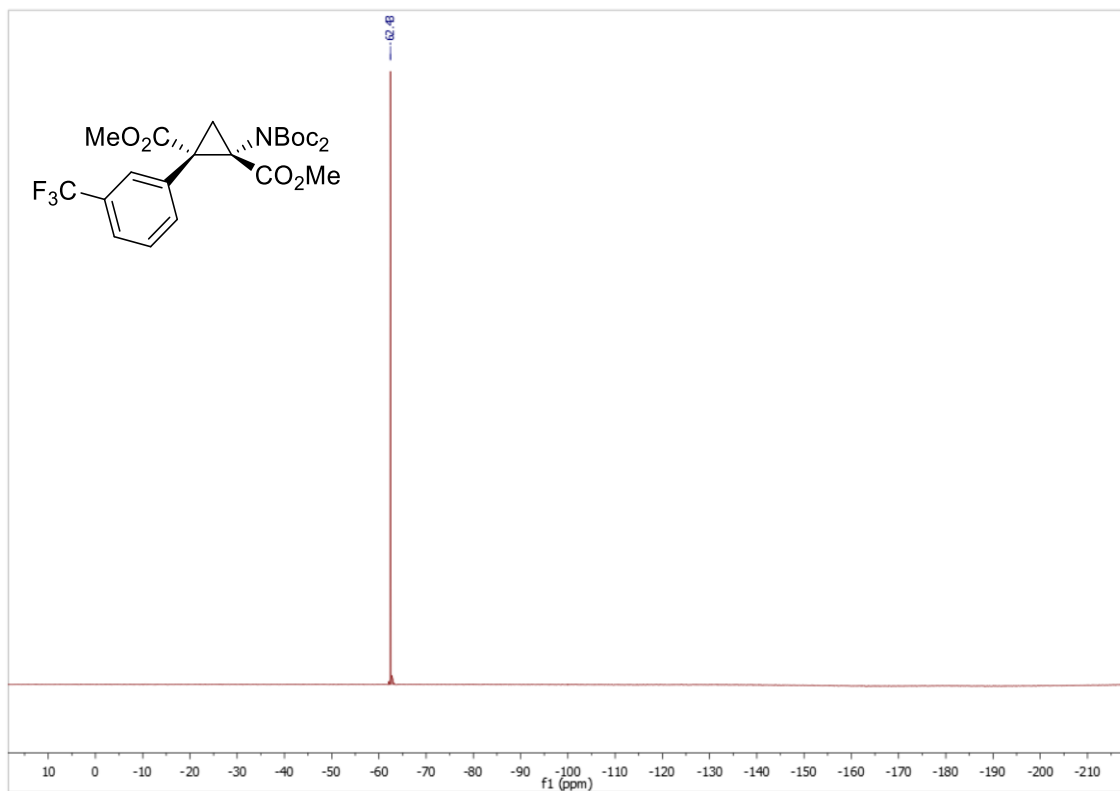

**Compound 14**: dimethyl (1*S*,2*S*)-1-(bis(tert-butoxycarbonyl)amino)-2-(3,4-dichlorophenyl)cyclopropane-1,2-dicarboxylate

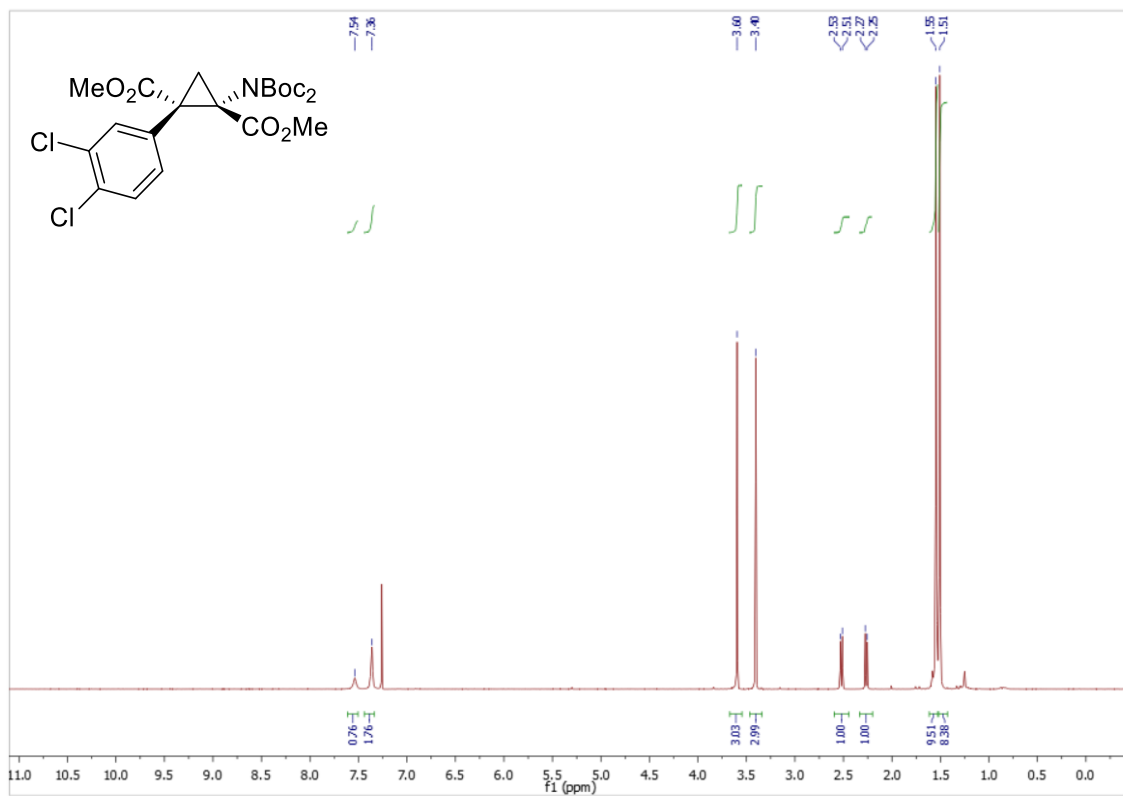

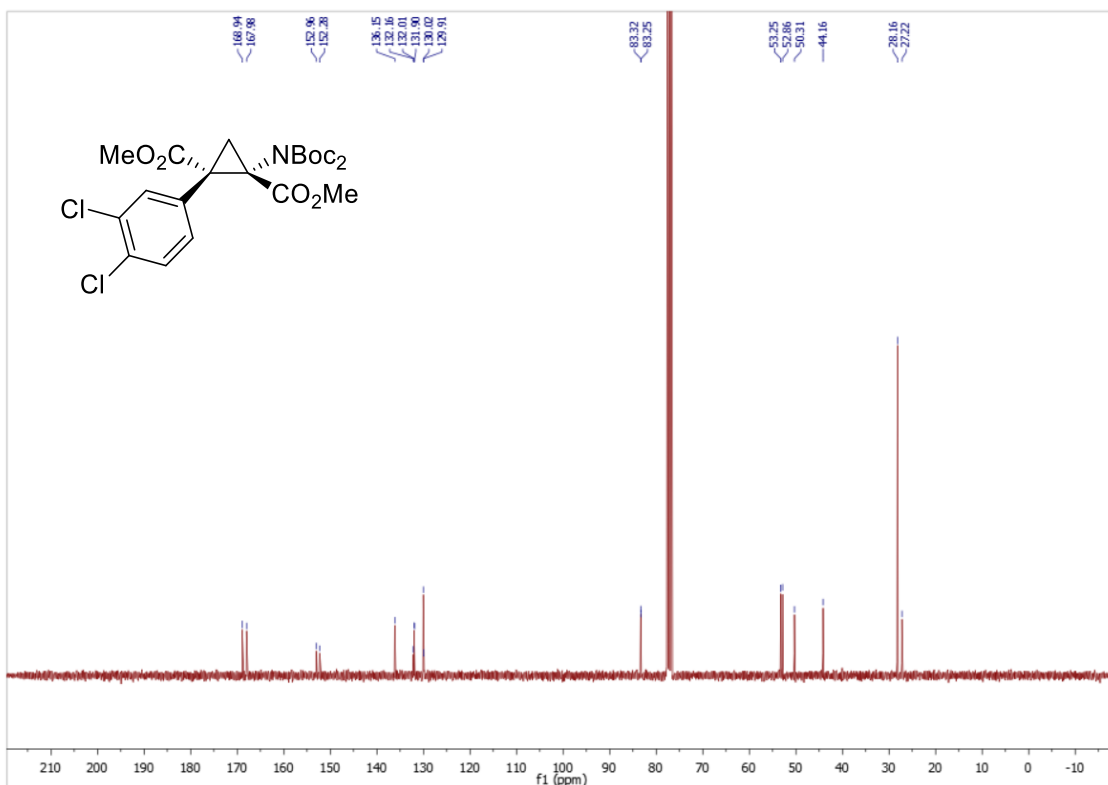

**Compound 15**: 2-ethyl 1-methyl (1*S*,2*S*)-1-(bis(tert-butoxycarbonyl)amino)-2-((trimethylsilyl)ethynyl)cyclopropane-1,2-dicarboxylate

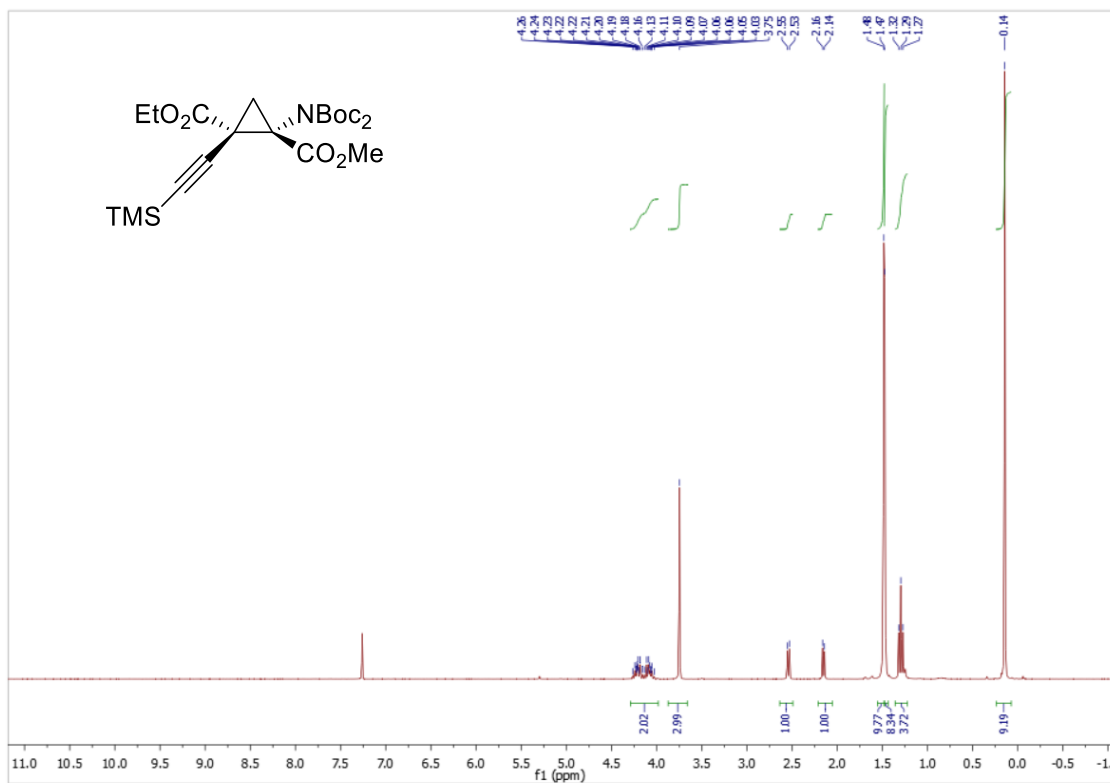

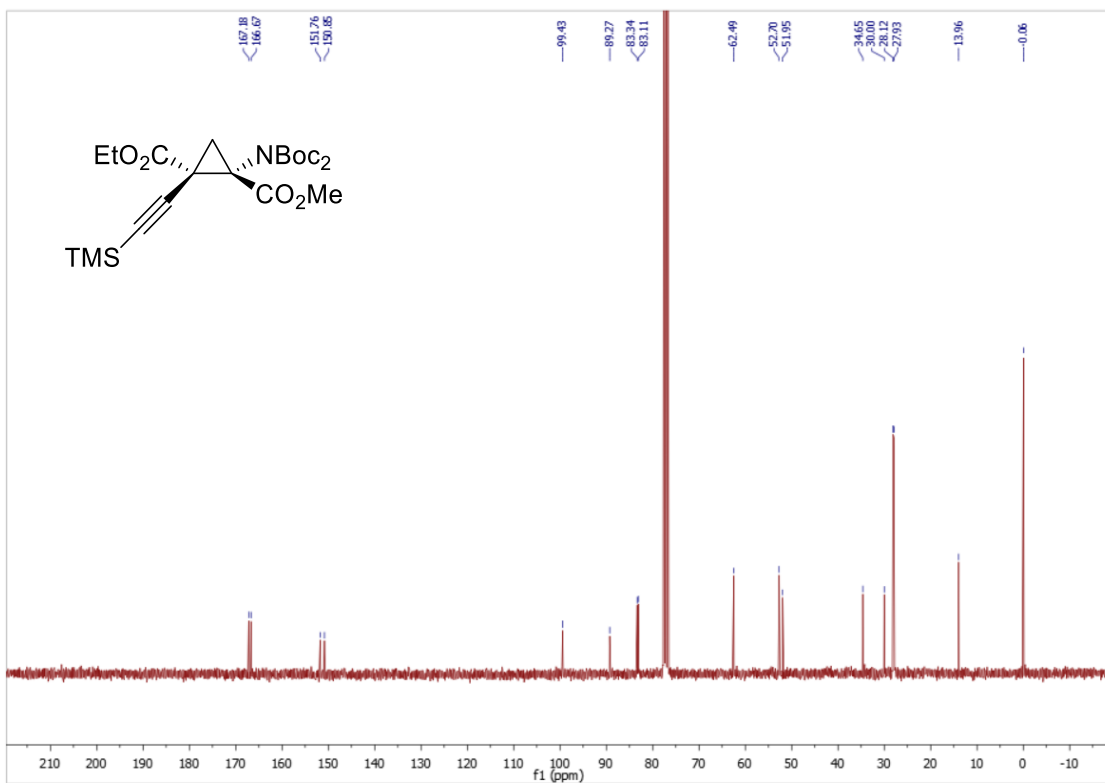

**Compound 16**: 2-ethyl 1-methyl (1*S*,2*S*)-1-(bis(tert-butoxycarbonyl)amino)-2-(phenylethynyl)cyclopropane-1,2-dicarboxylate

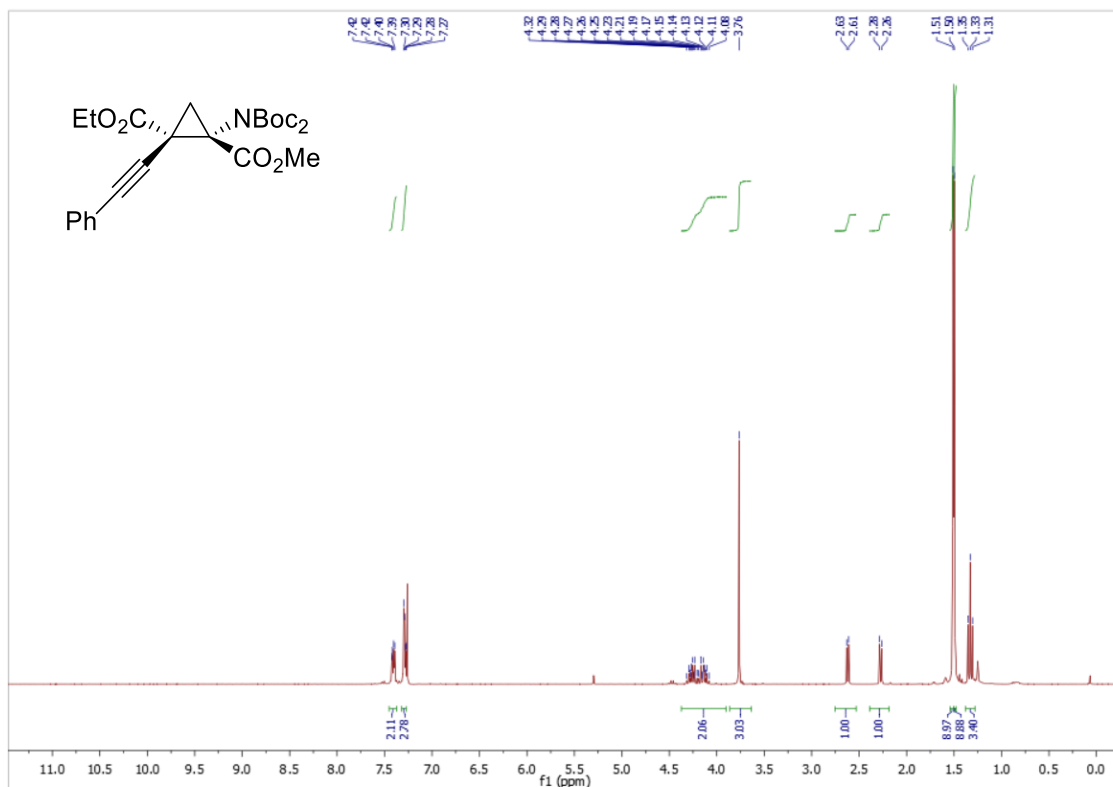

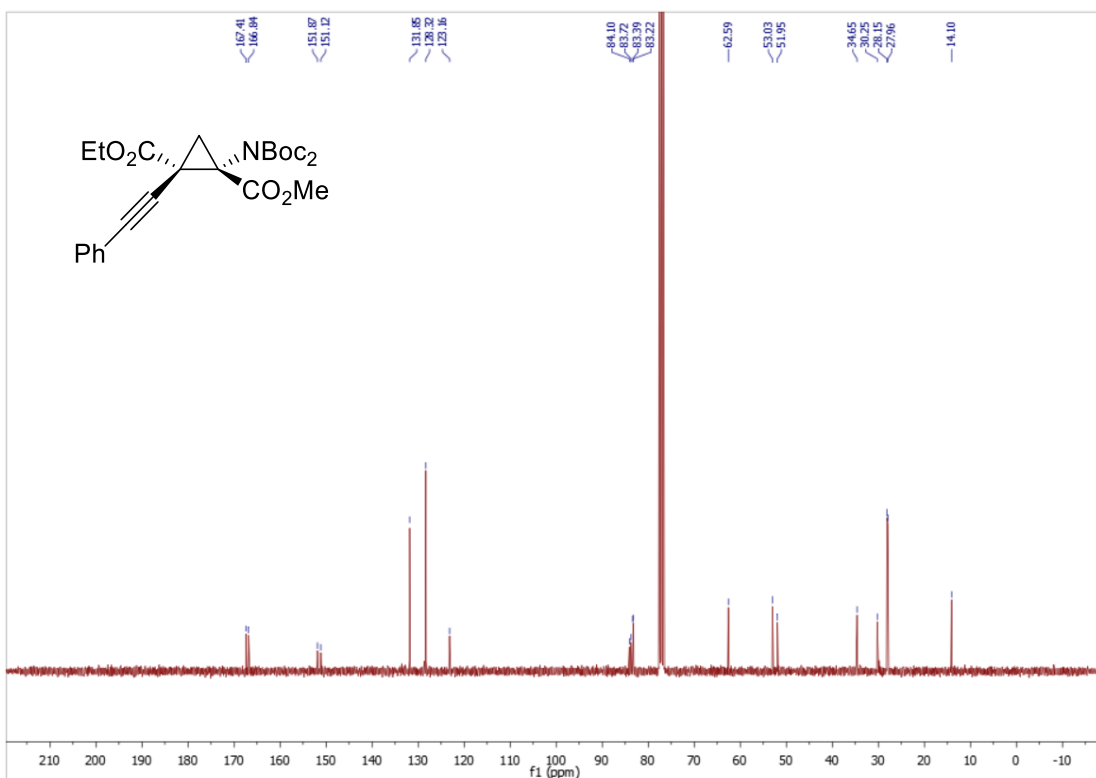

**Compound 17**: 2-ethyl 1-methyl (1*S*,2*S*)-1-(bis(tert-butoxycarbonyl)amino)-2-((*E*)-styryl)cyclopropane-1,2-dicarboxylate

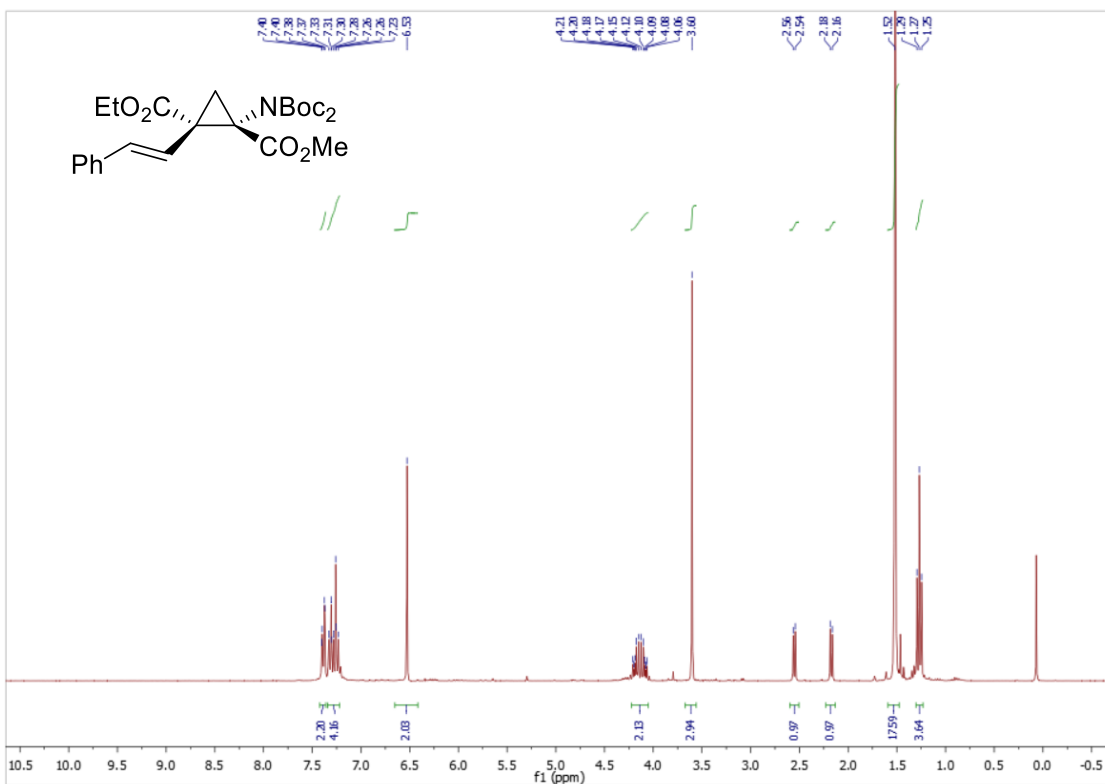

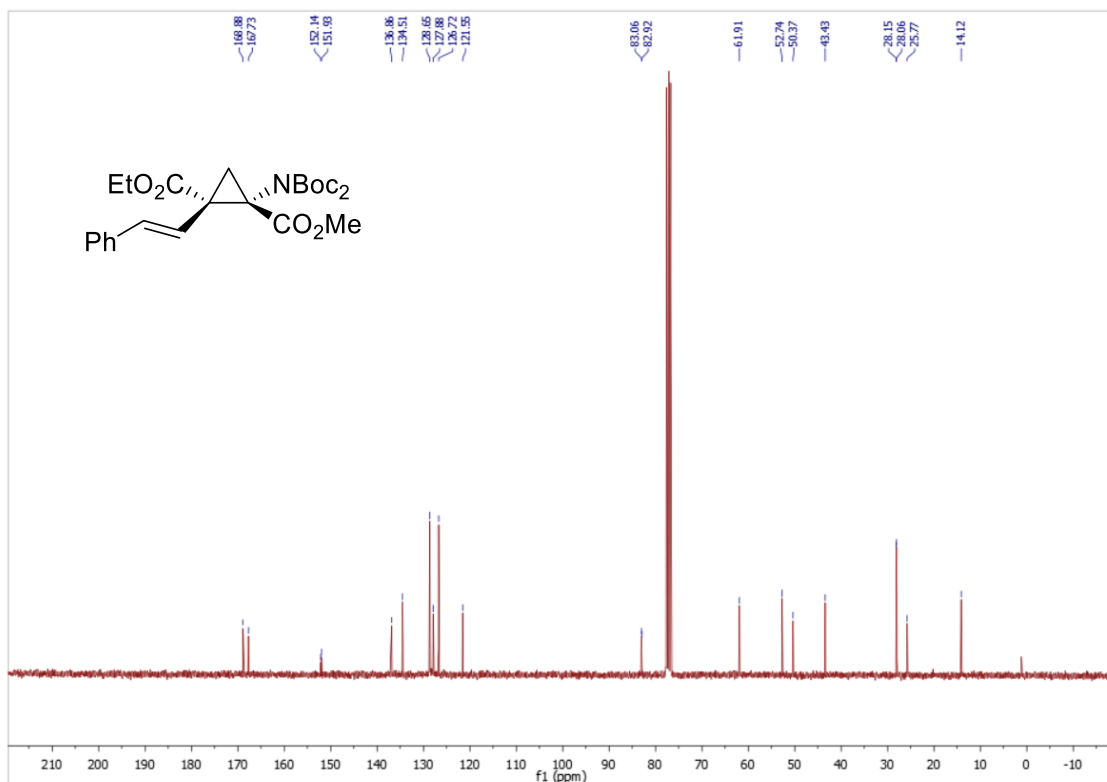

**Compound 18** : methyl (1*S*,2*R*)-2-((tert-butoxycarbonyl)amino)-2-(diethoxyphosphoryl)-1-phenyl cyclopropane-1-carboxylate

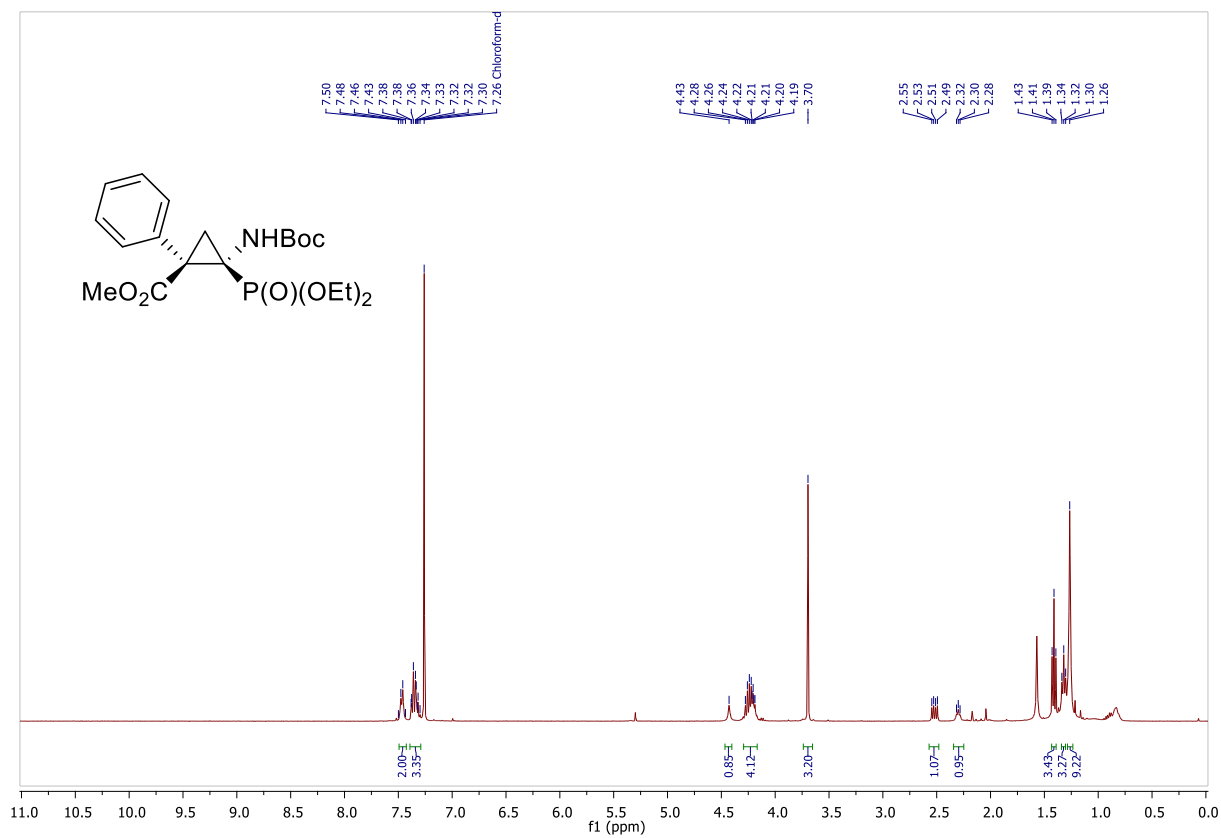



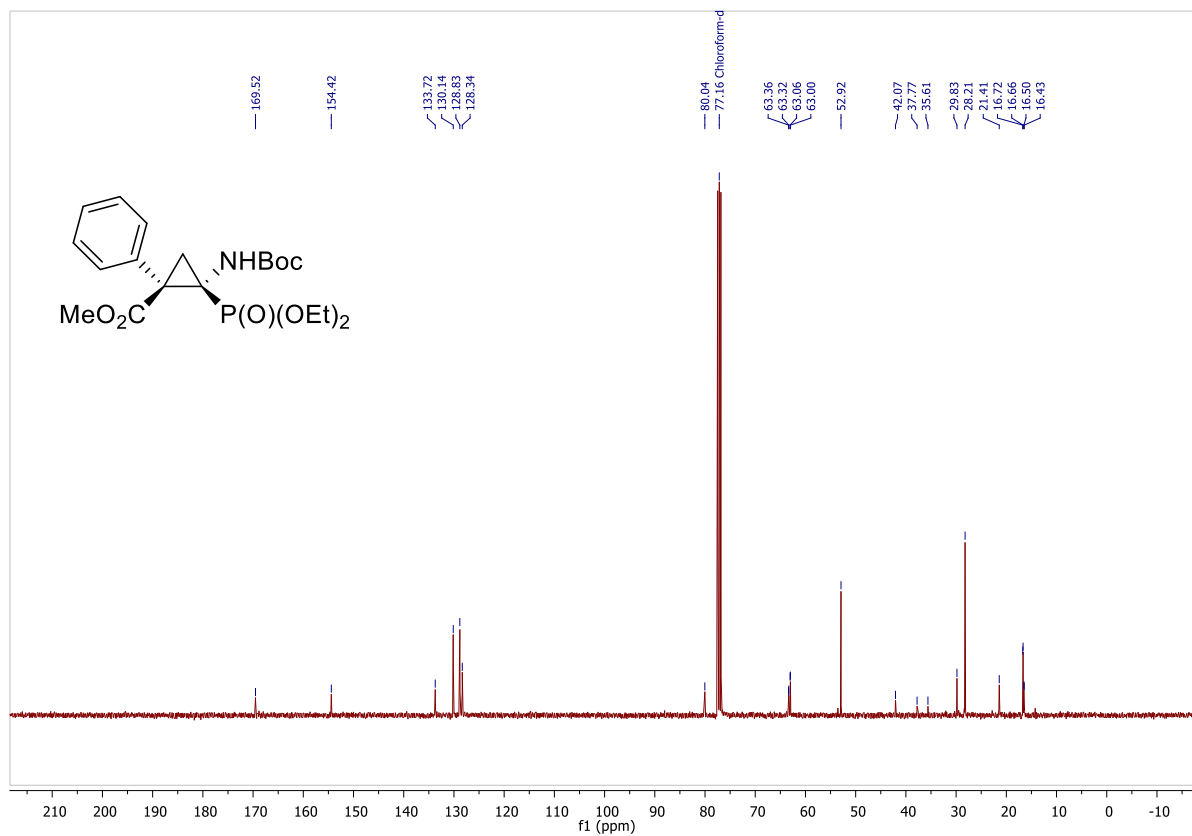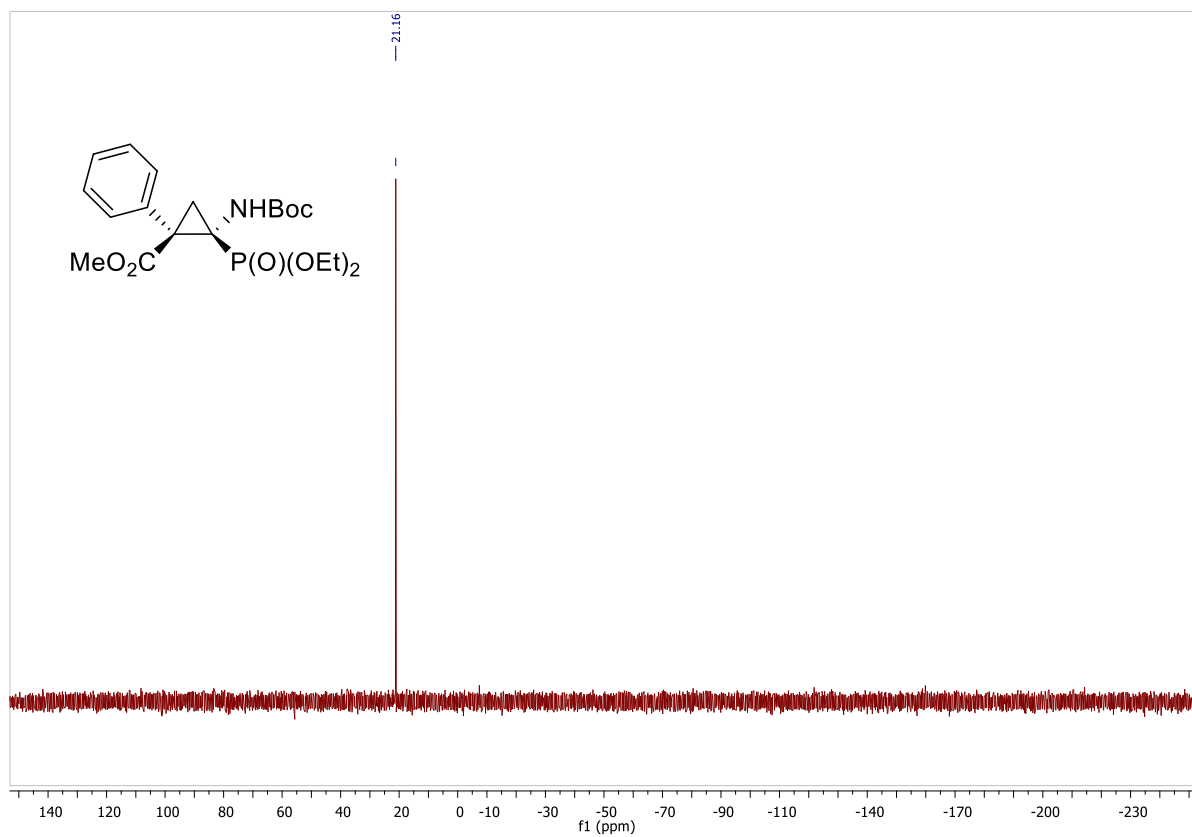

**Compound 19** : methyl (1*S*,2*R*)-2-(((benzyloxy)carbonyl)amino)-2-(diethoxyphosphoryl)-1-phenylcyclopropane-1-carboxylate

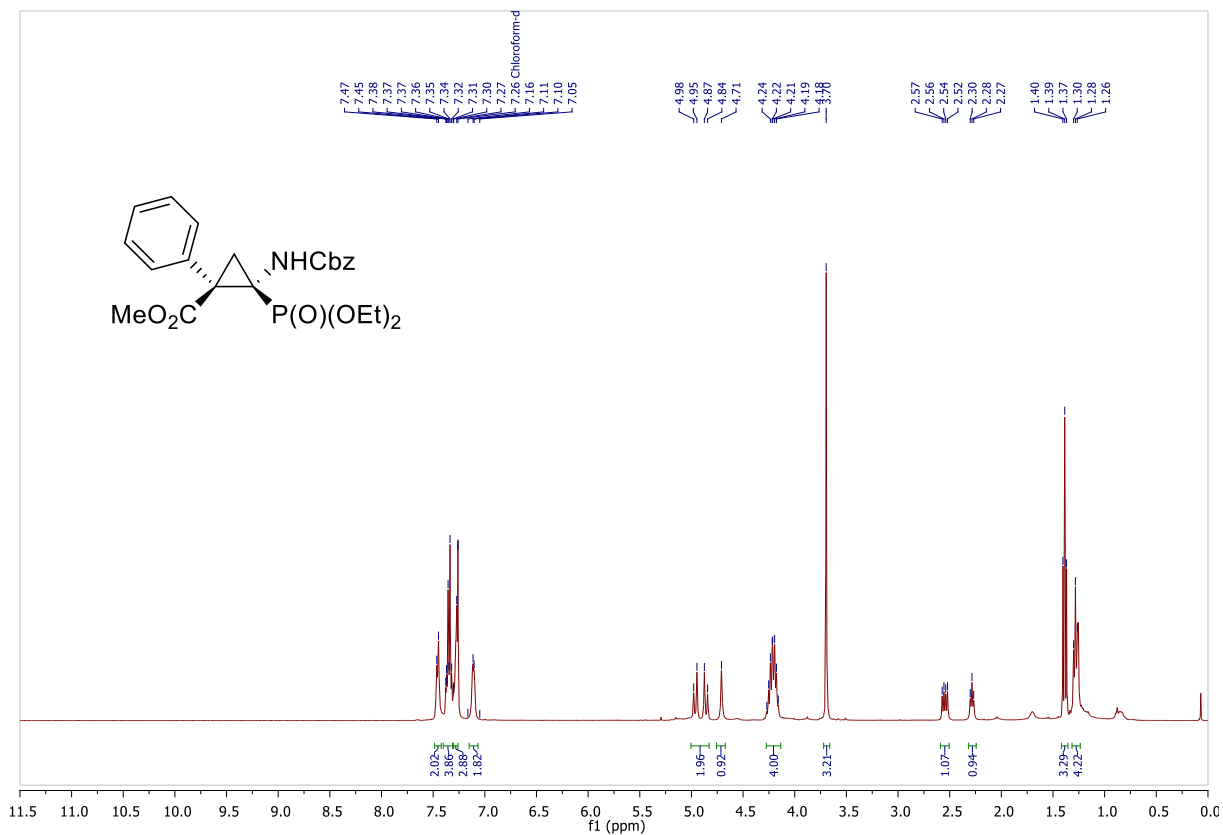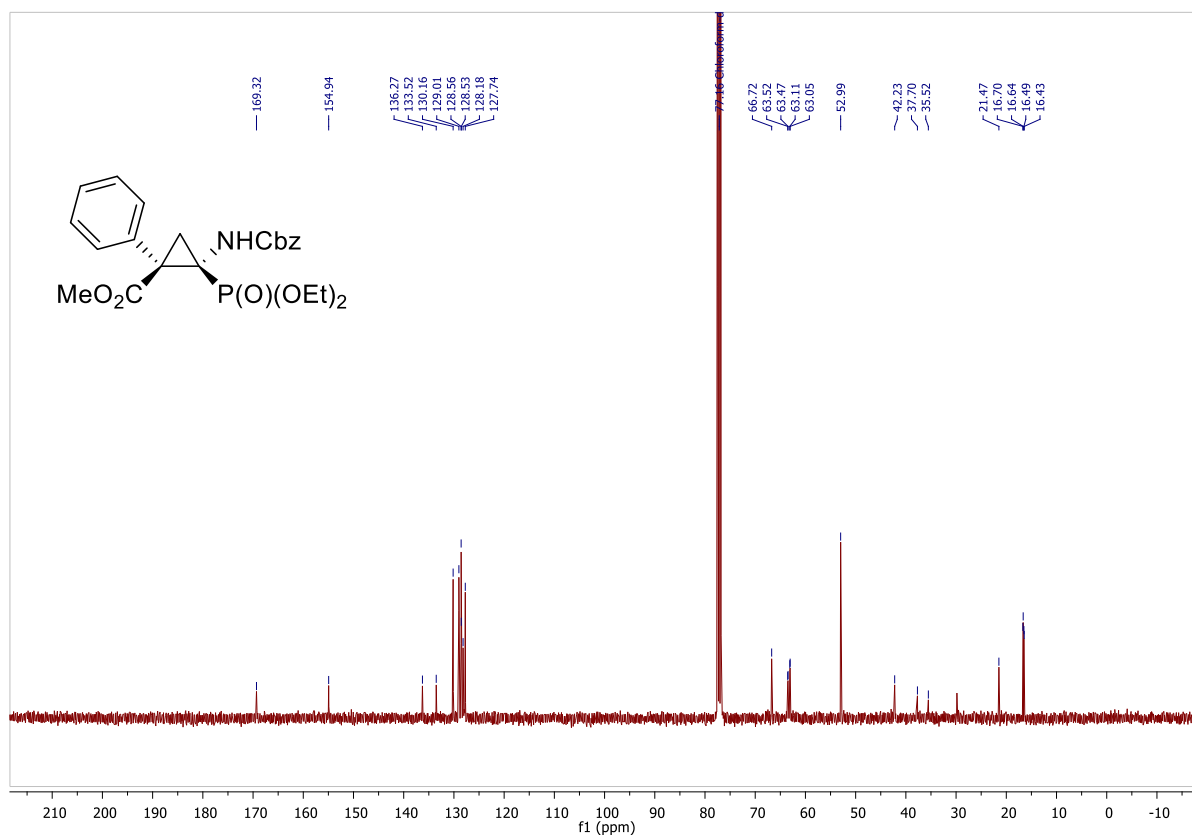

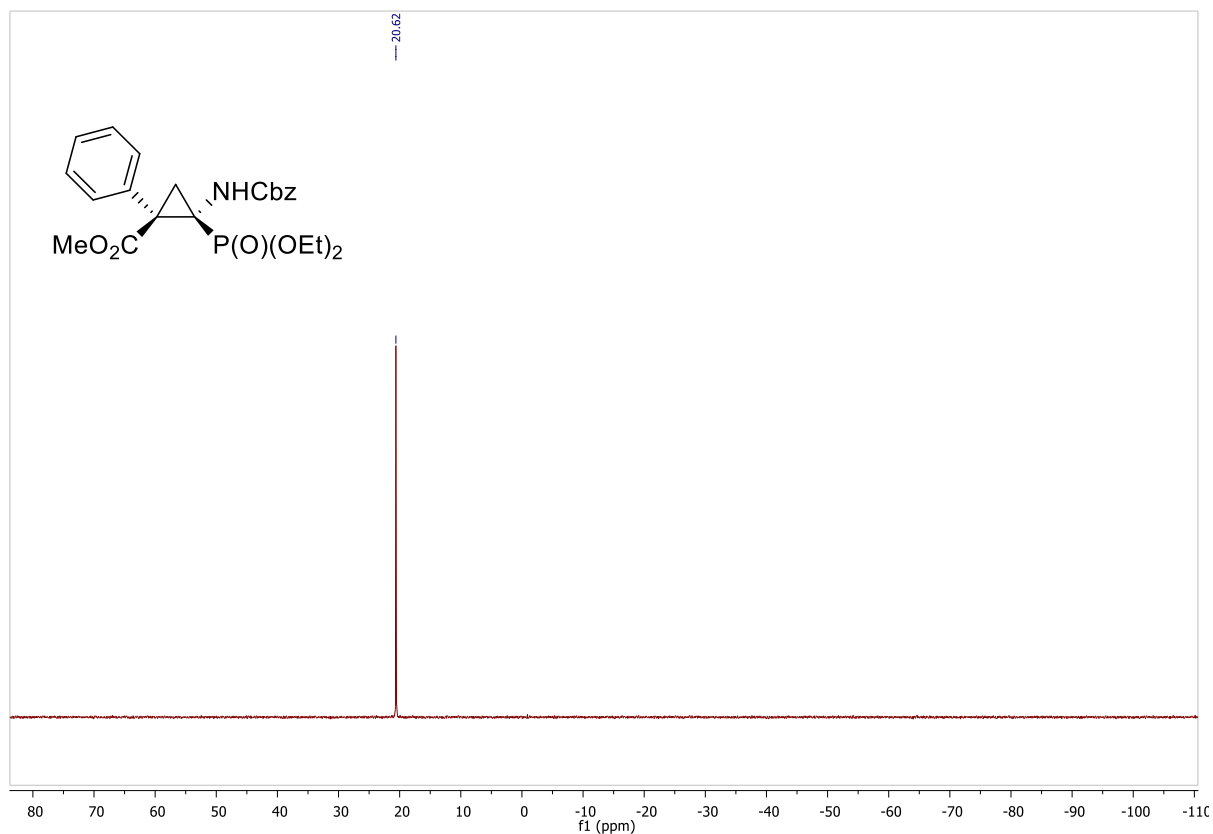

**Compound 20 : ethyl (1S,2R)-2-(((benzyloxy)carbonyl)amino)-2-(diethoxyphosphoryl)-1-phenyl cyclopropane-1-carboxylate**

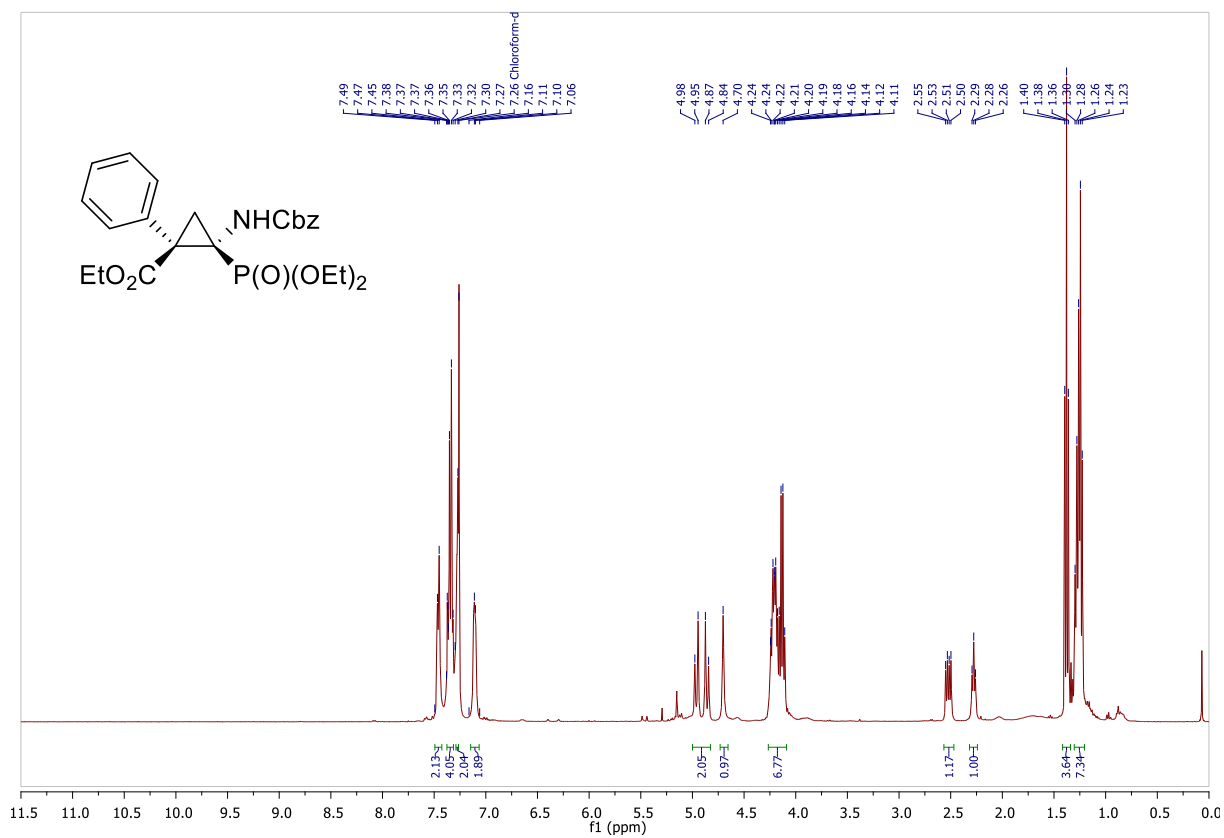

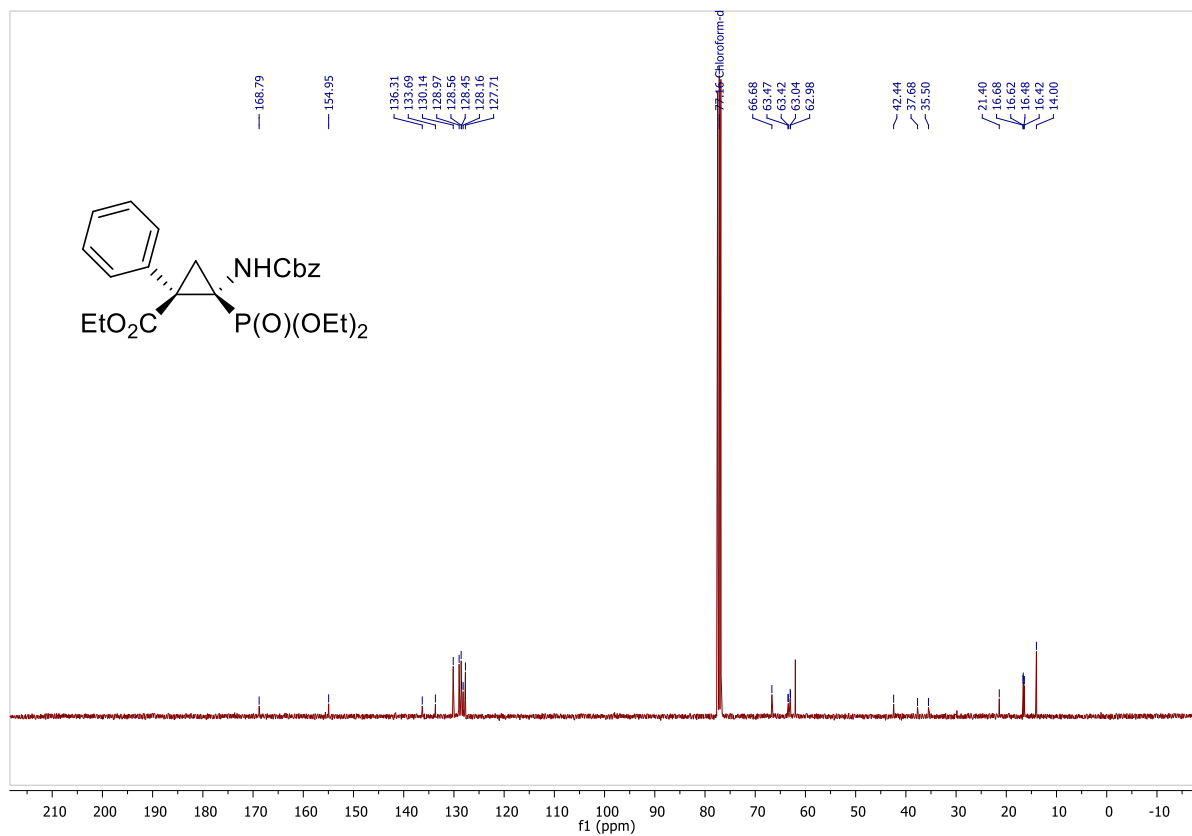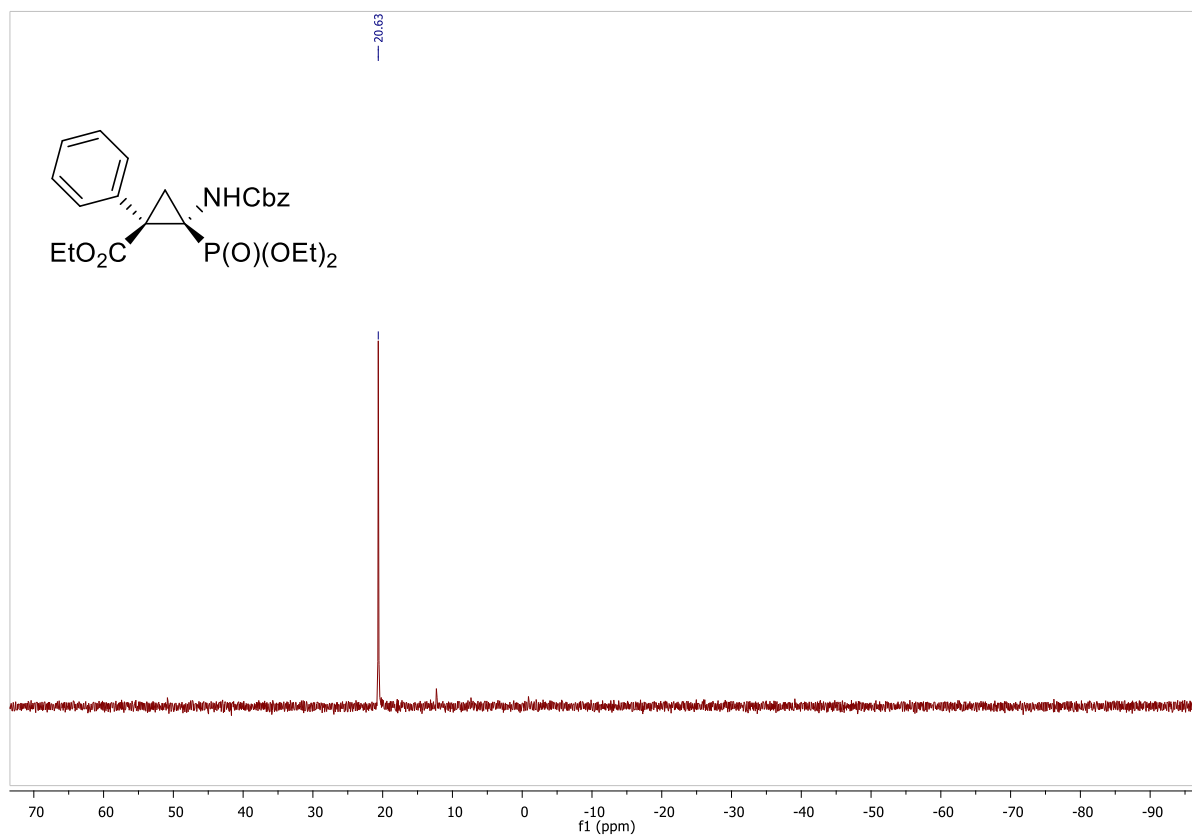

**Compound 21:** methyl (1*S*,2*R*)-2-(((benzyloxy)carbonyl)amino)-2-(diethoxyphosphoryl)-1-(*p*-tolyl) cyclopropane-1-carboxylate

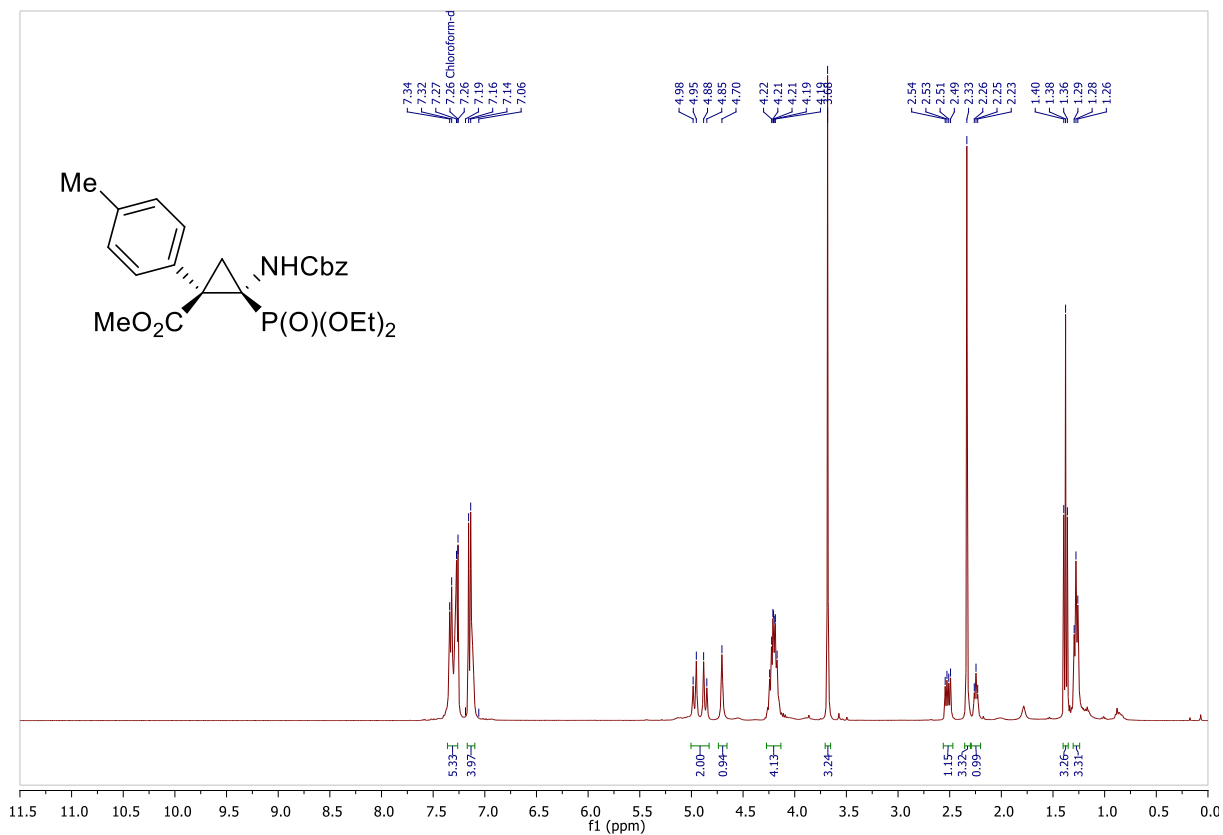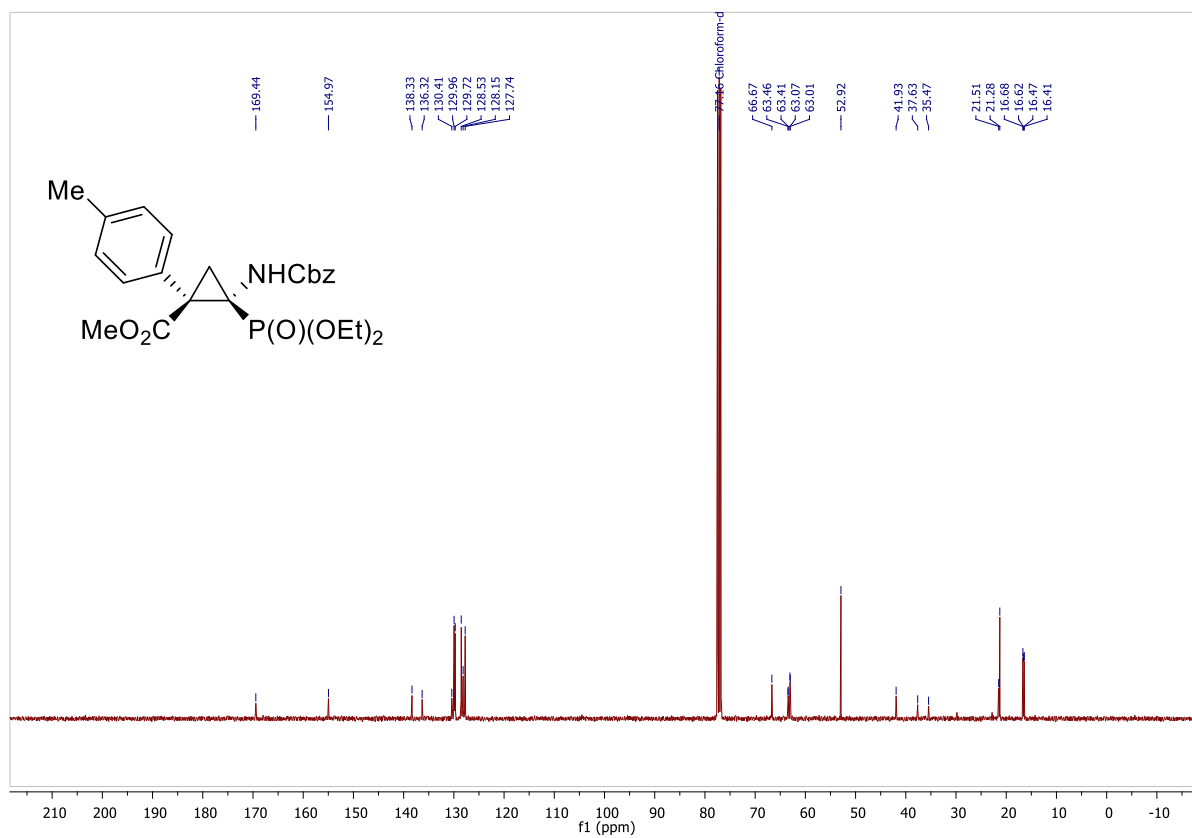

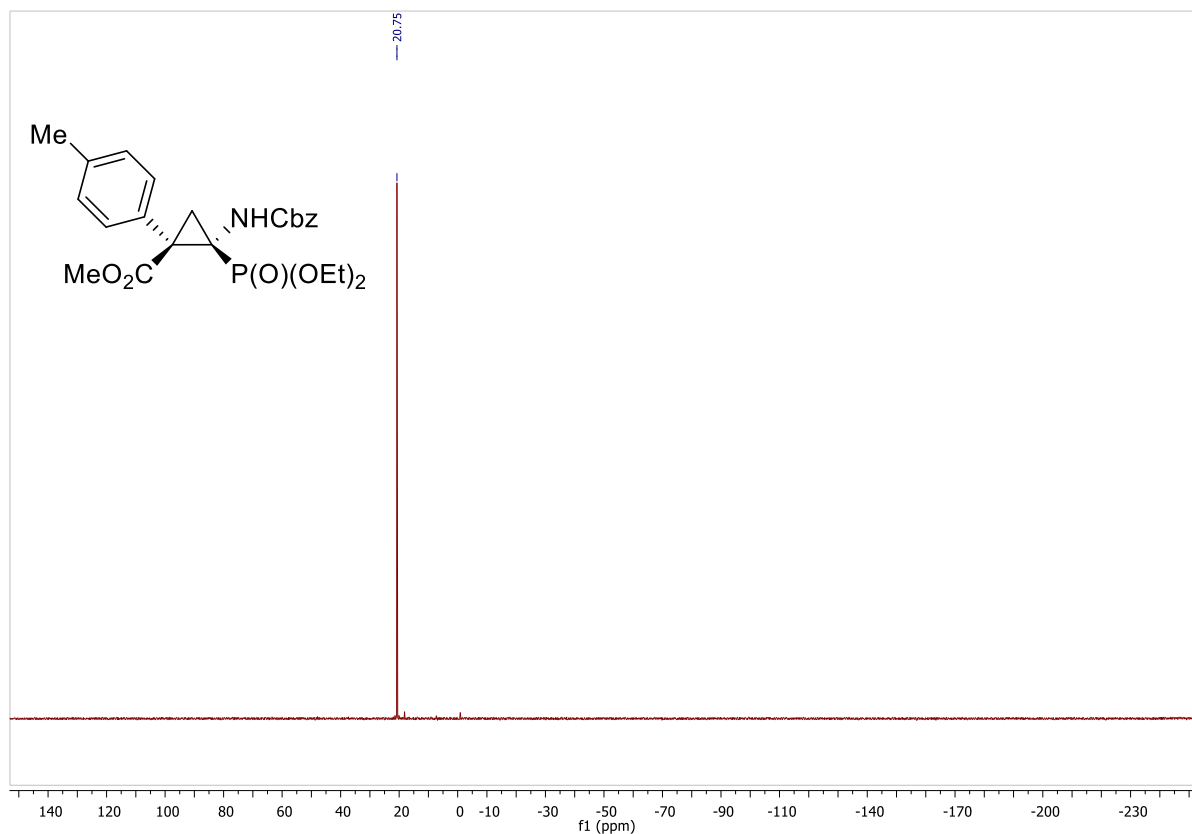

**Compound 22** : ethyl (1*S*,2*R*)-2-(((benzyloxy)carbonyl)amino)-2-(diethoxyphosphoryl)-1-(*p*-tolyl) cyclopropane-1-carboxylate

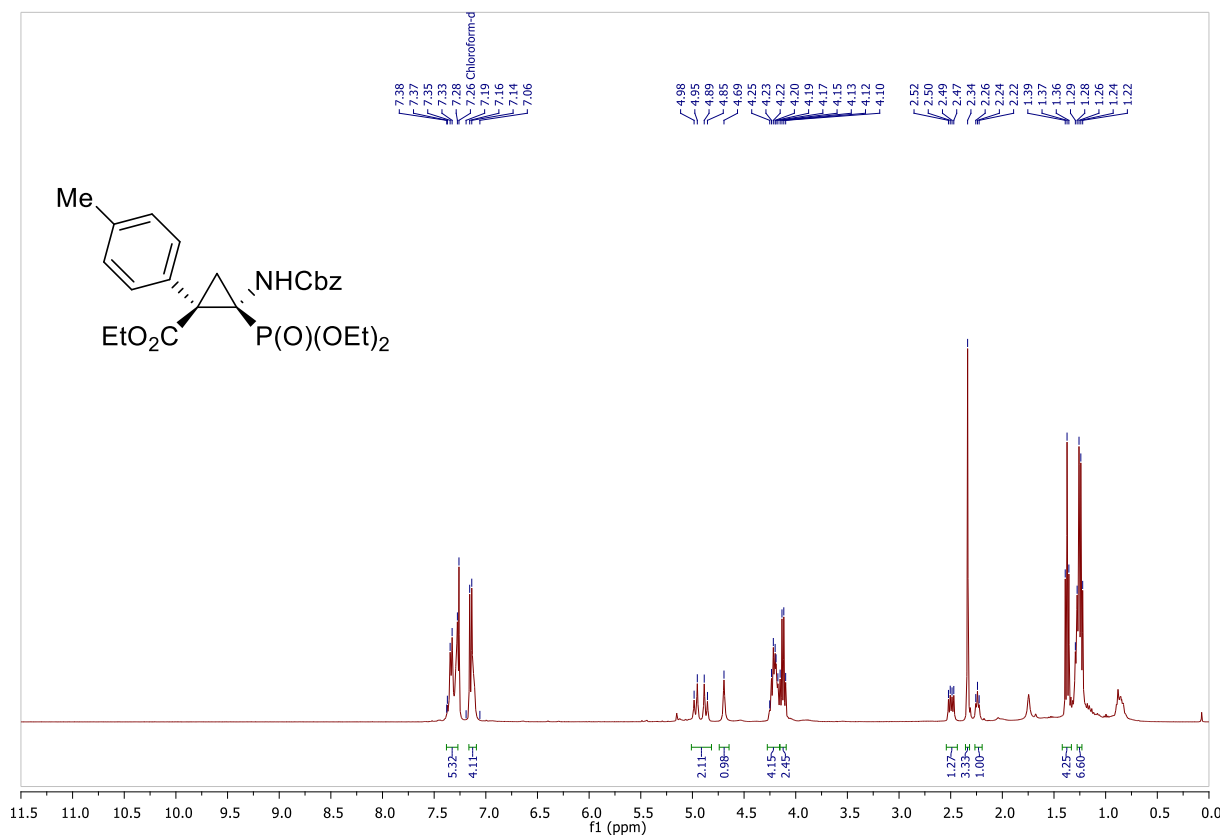

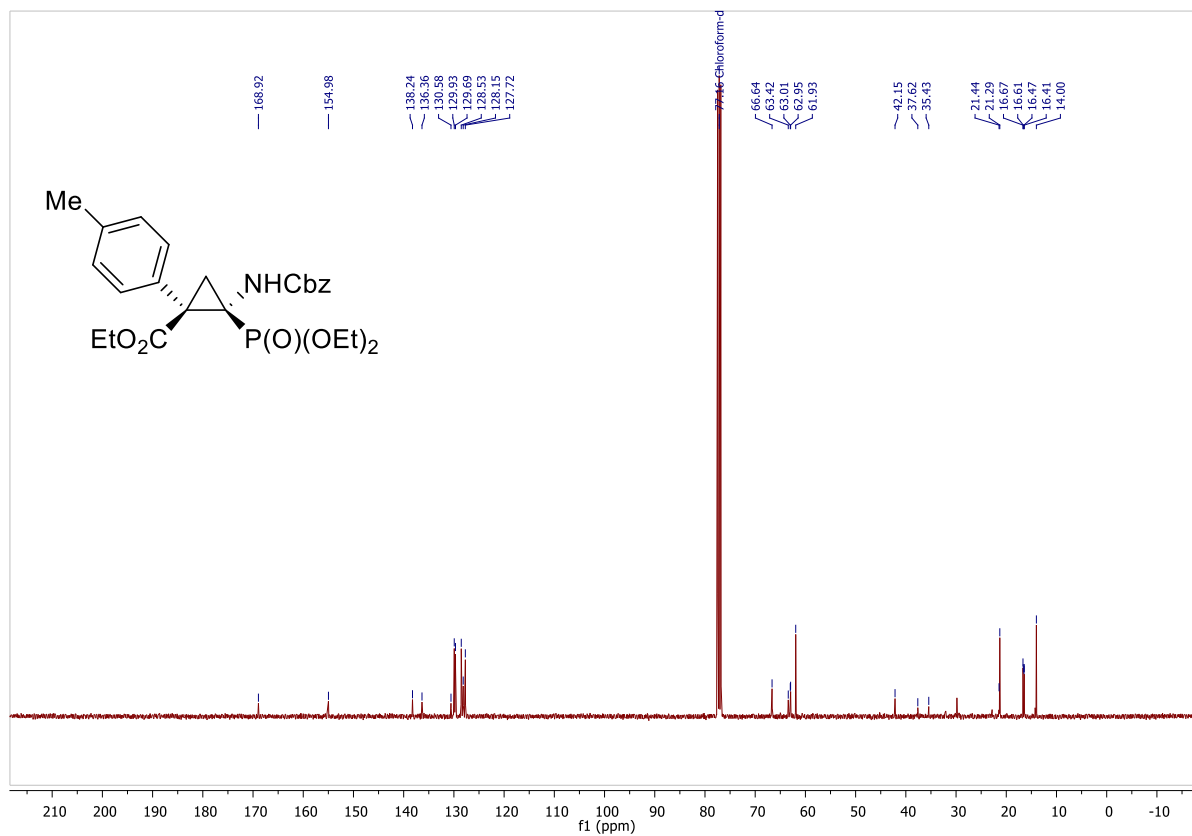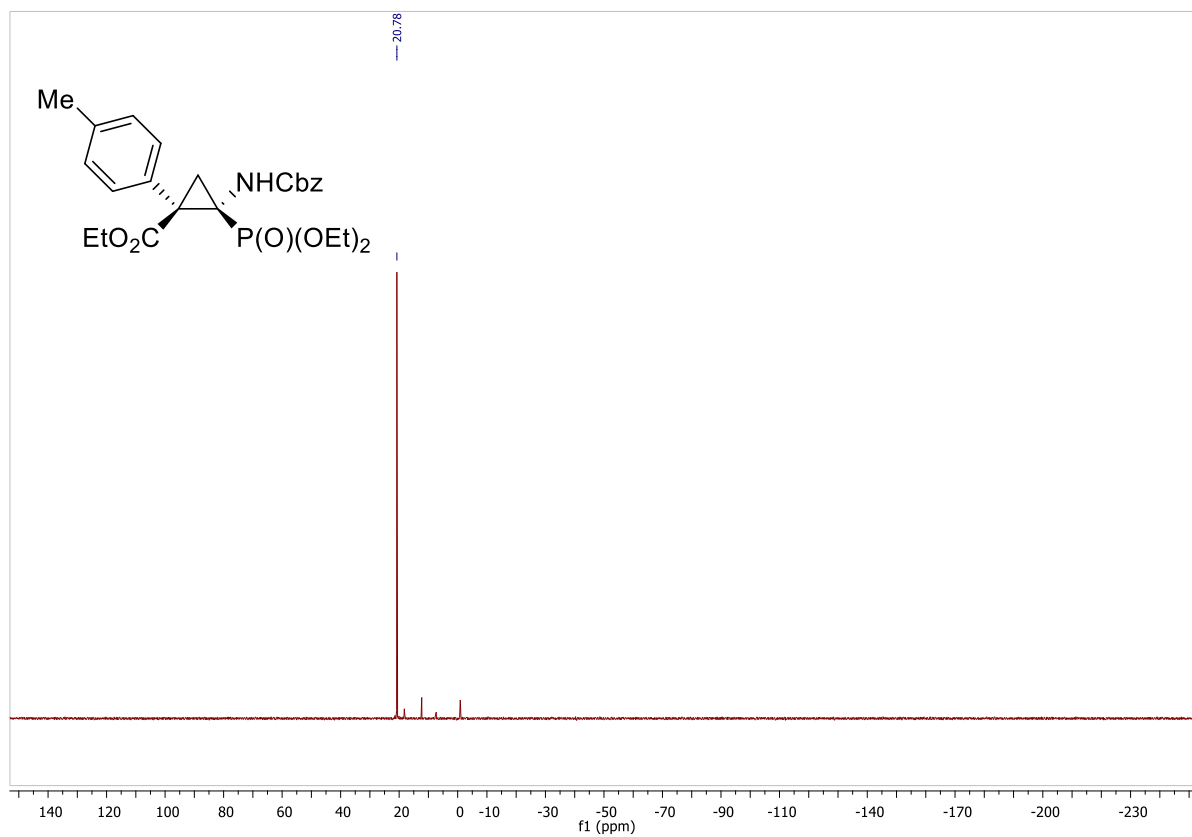

**Compound 23 : methyl (1S,2R)-2-(((benzyloxy)carbonyl)amino)-2-(diethoxyphosphoryl)-1-(4-methoxyphenyl)cyclopropane-1-carboxylate**

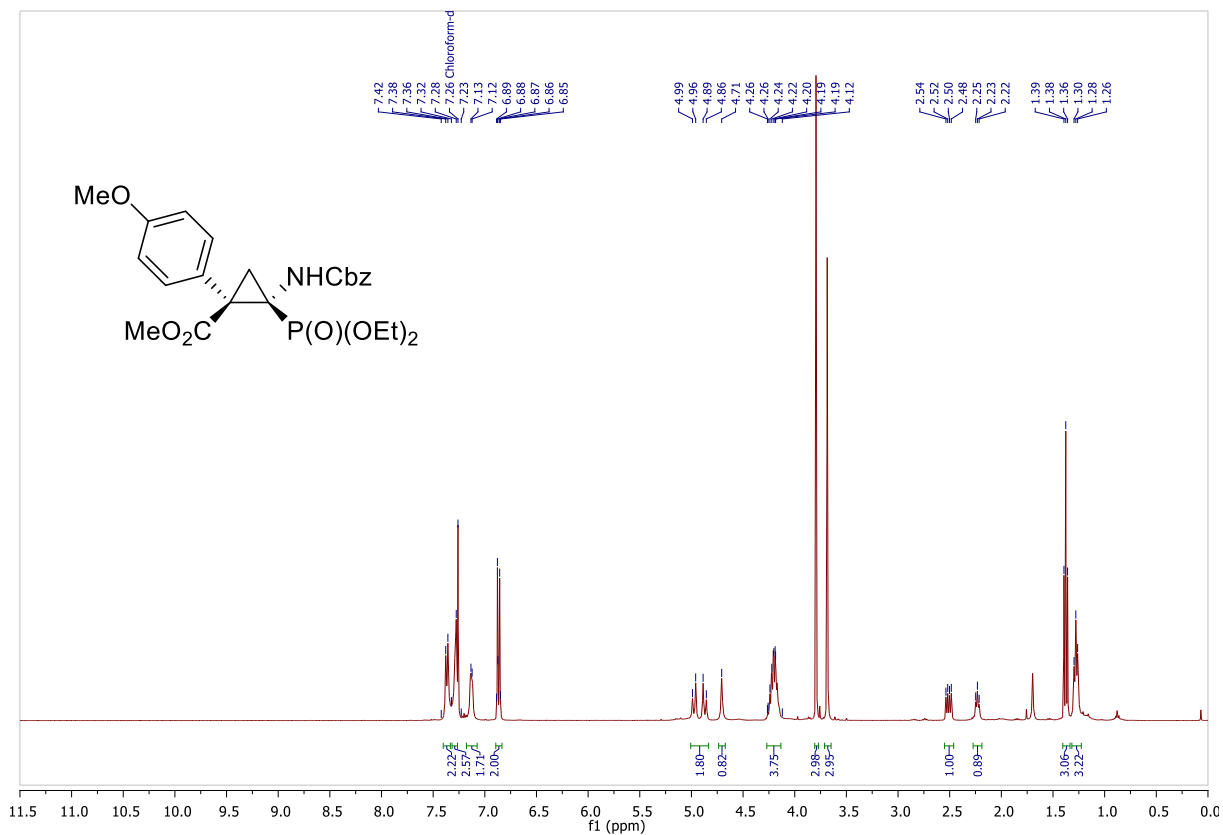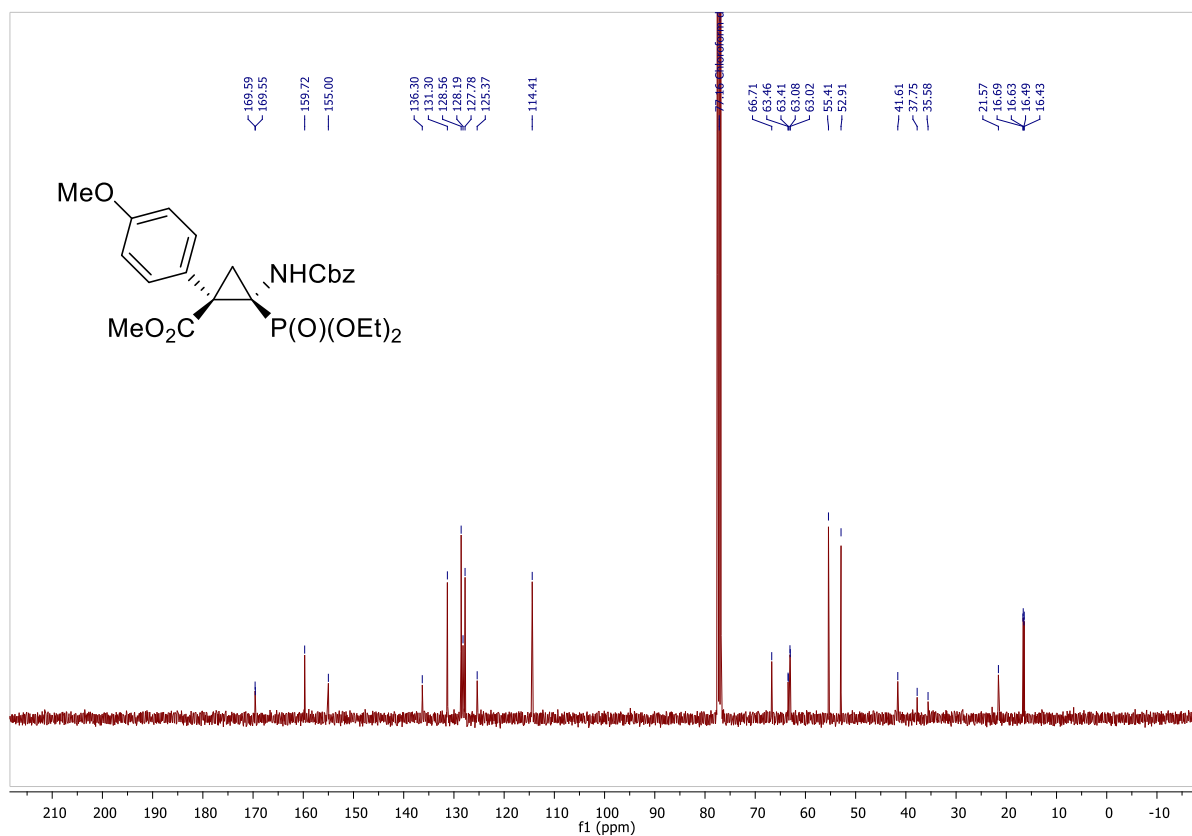



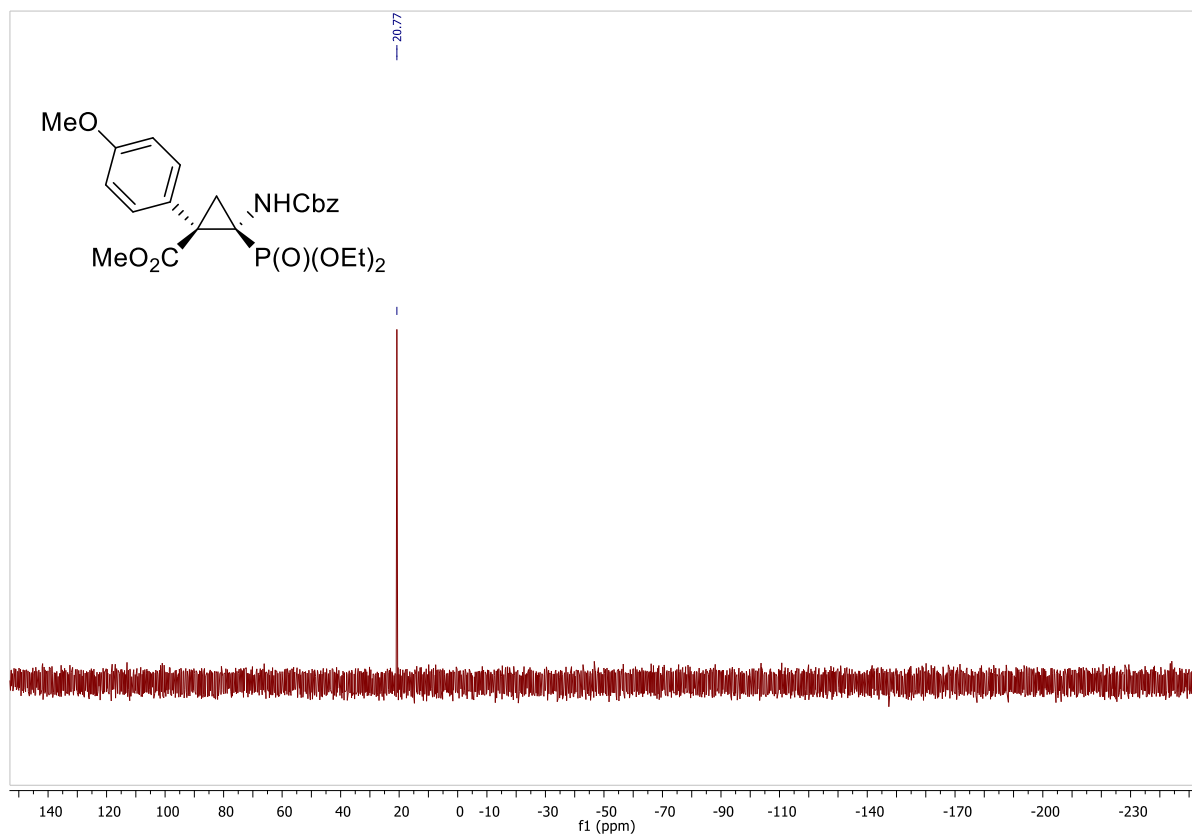

**Compound 24** : methyl (1R,2S)-1-([1,1'-biphenyl]-4-yl)-2-(((benzyloxy)carbonyl)amino)-2-(diethoxyphosphoryl)cyclopropane-1-carboxylate

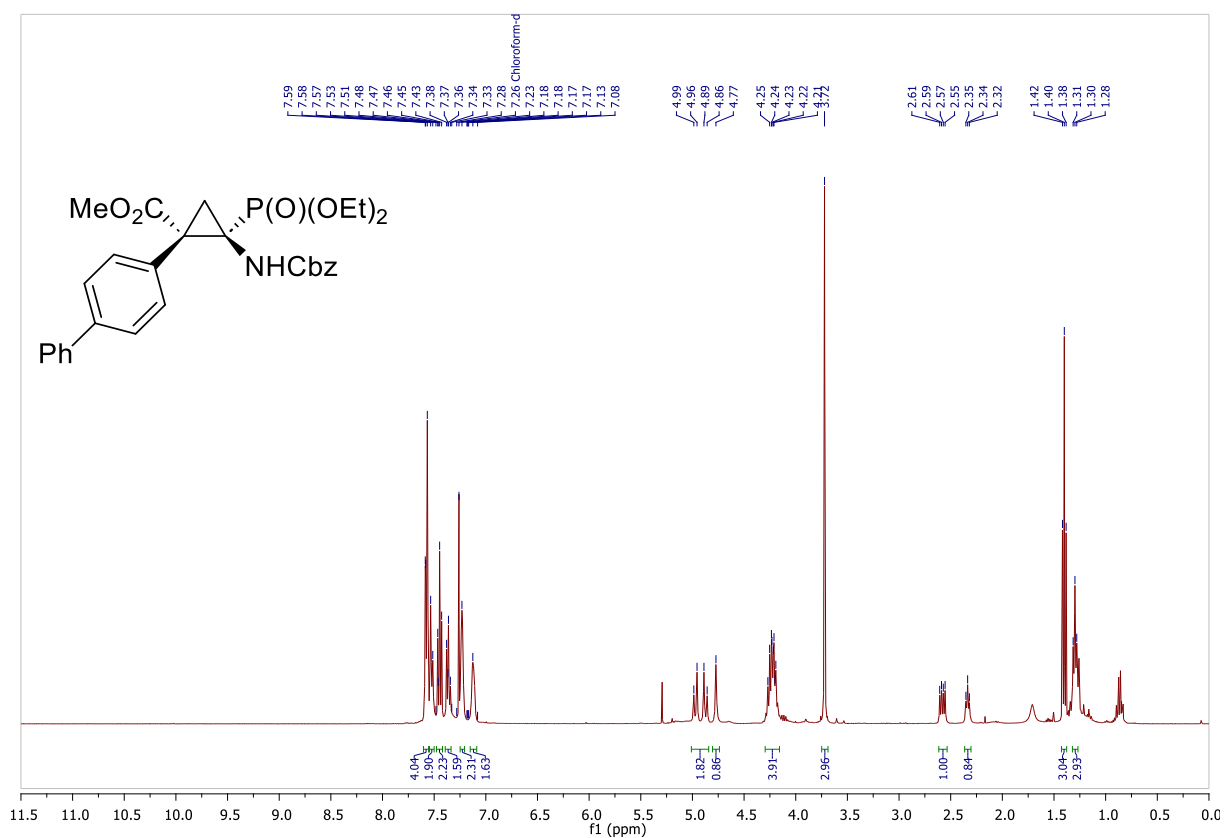

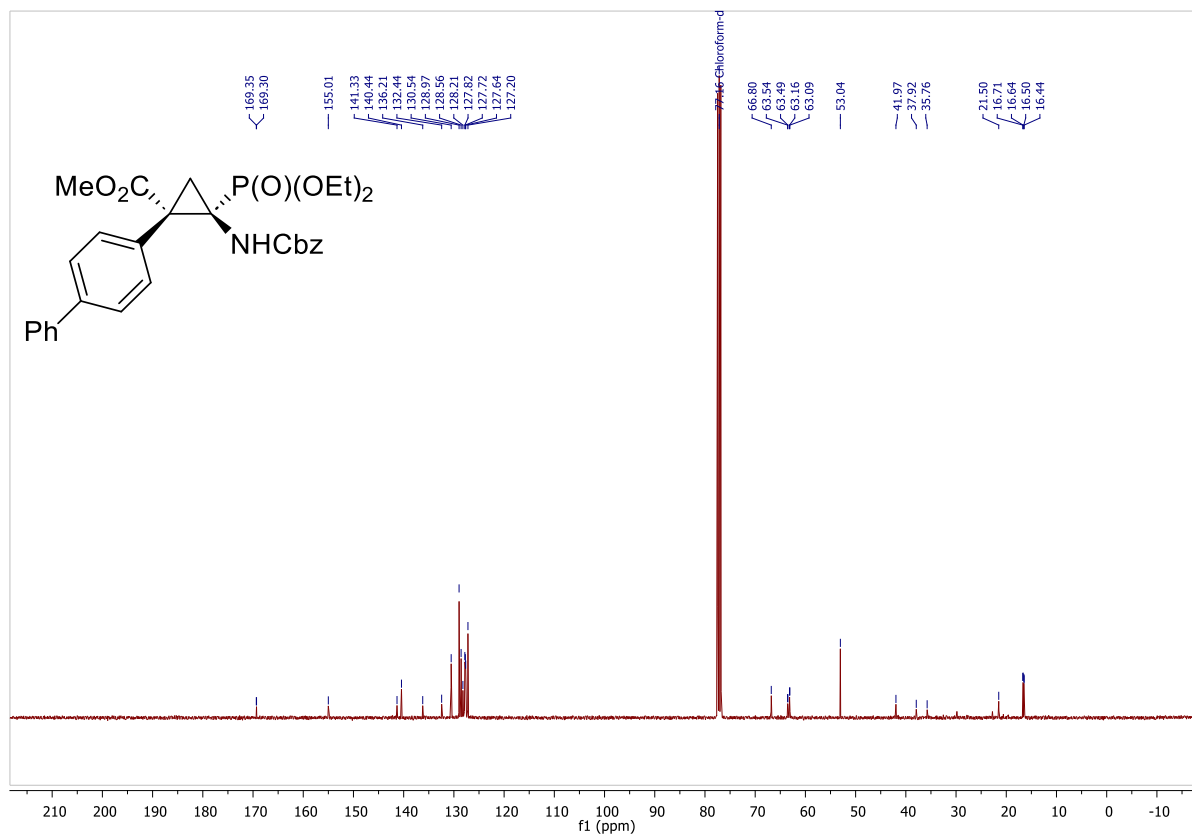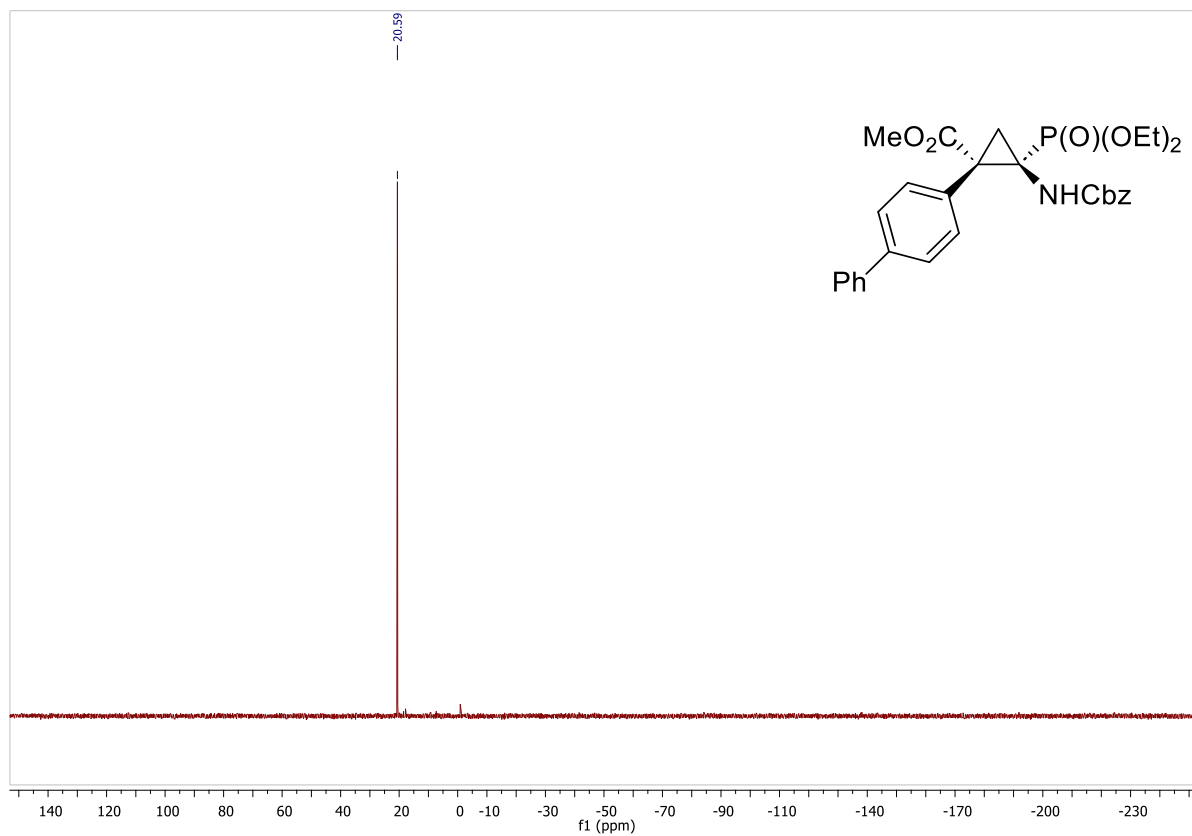

**Compound 25 : methyl (1S,2R)-2-(((benzyloxy)carbonyl)amino)-2-(diethoxyphosphoryl)-1-(4-fluoro phenyl)cyclopropane-1-carboxylate**

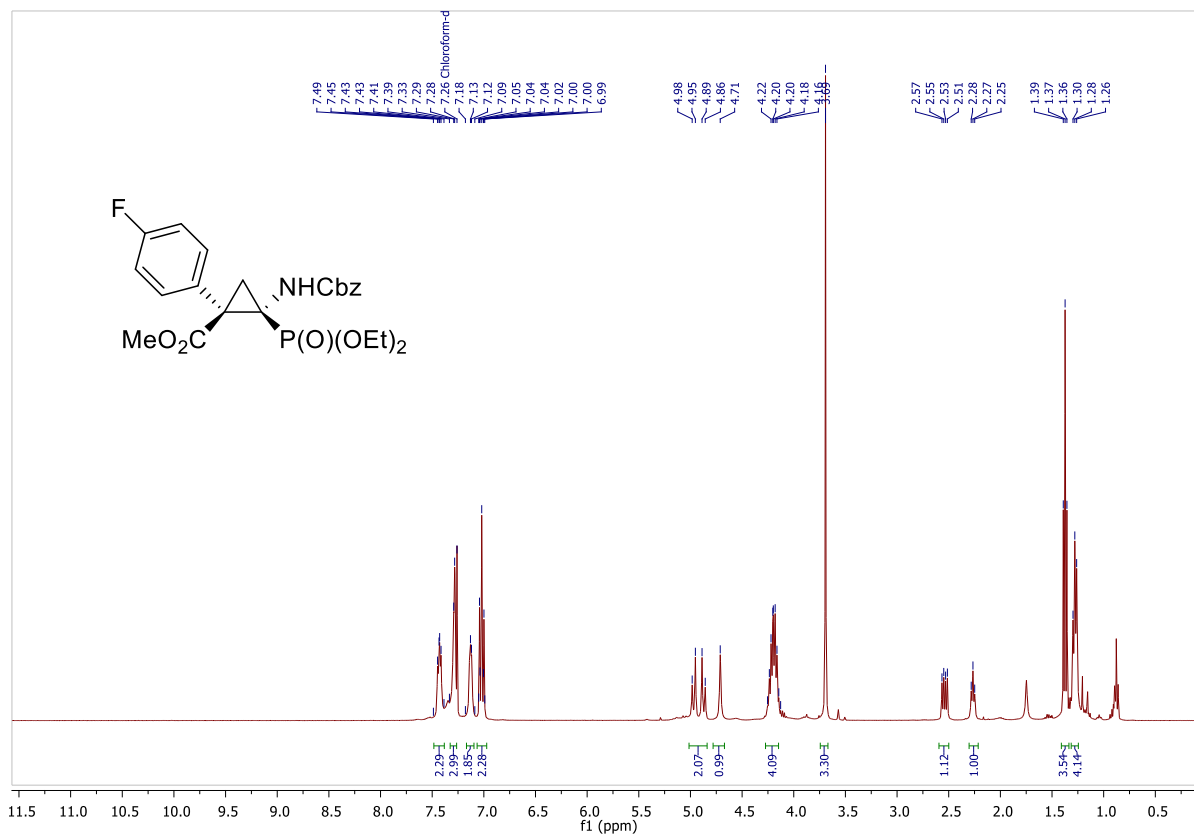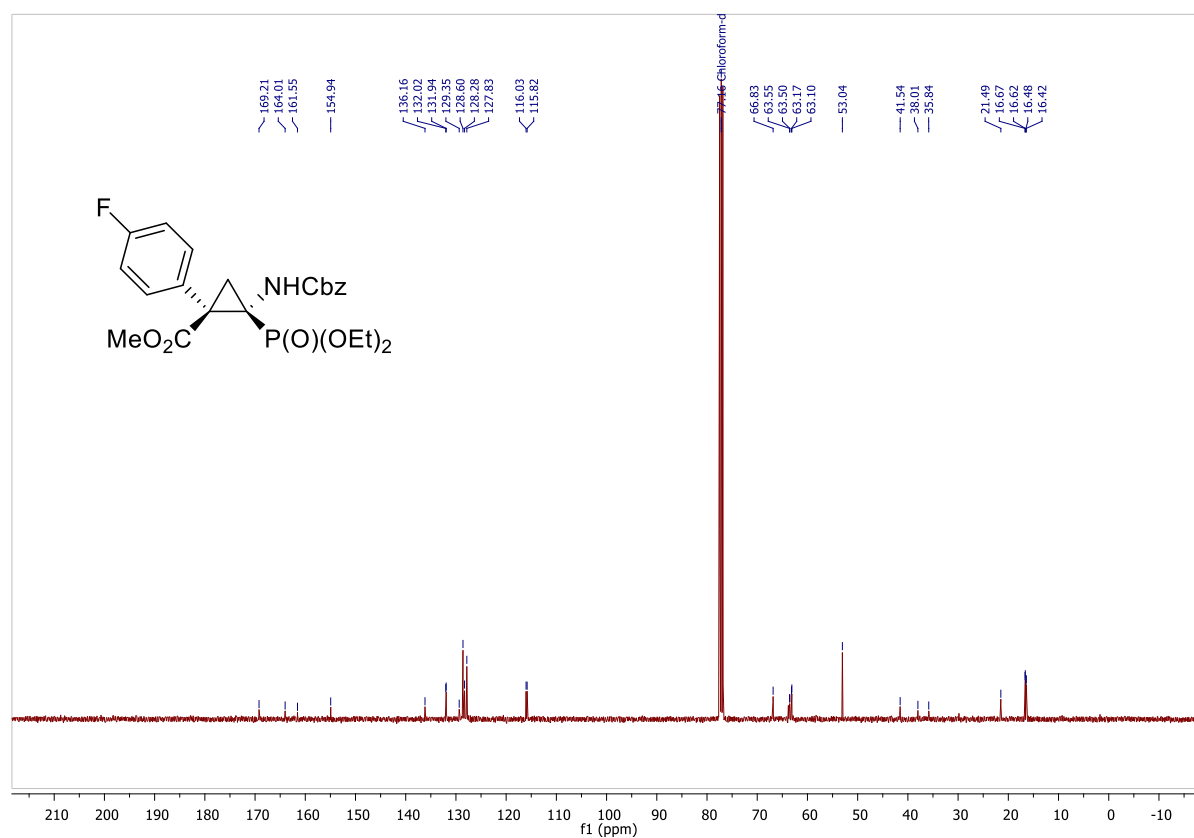

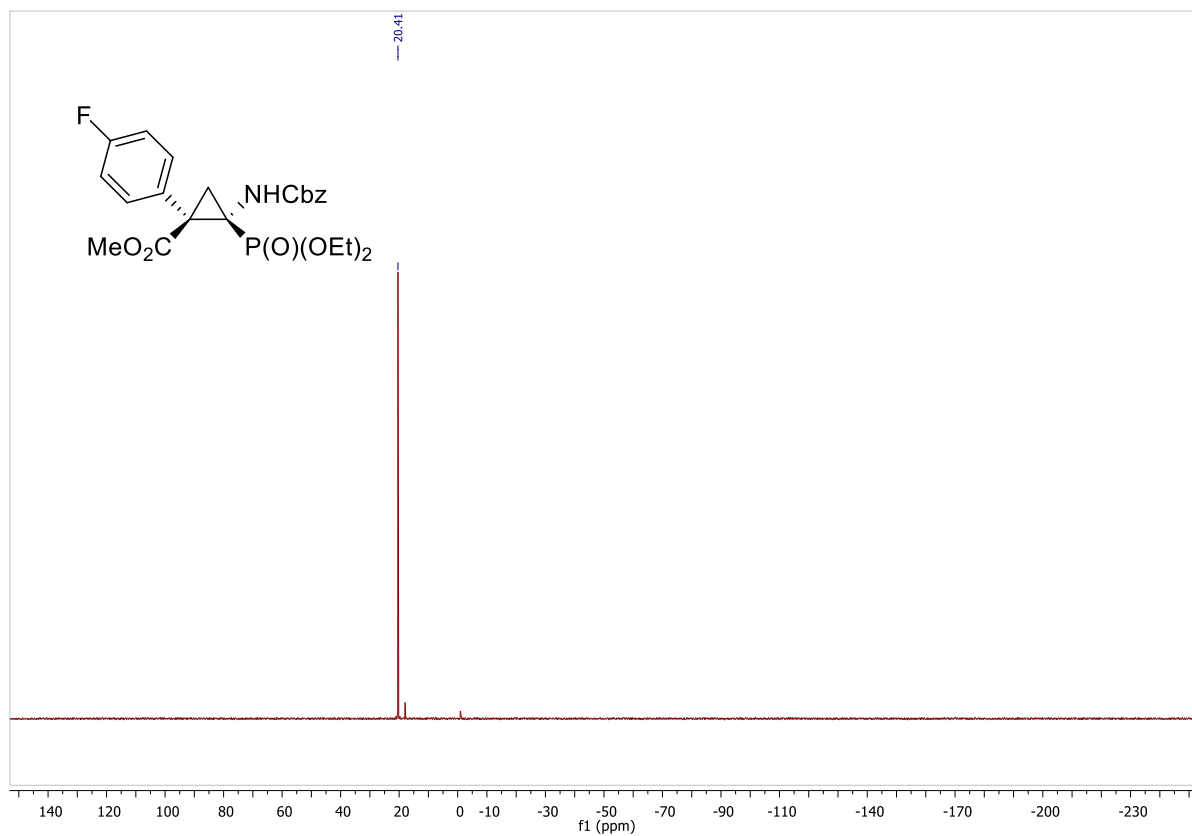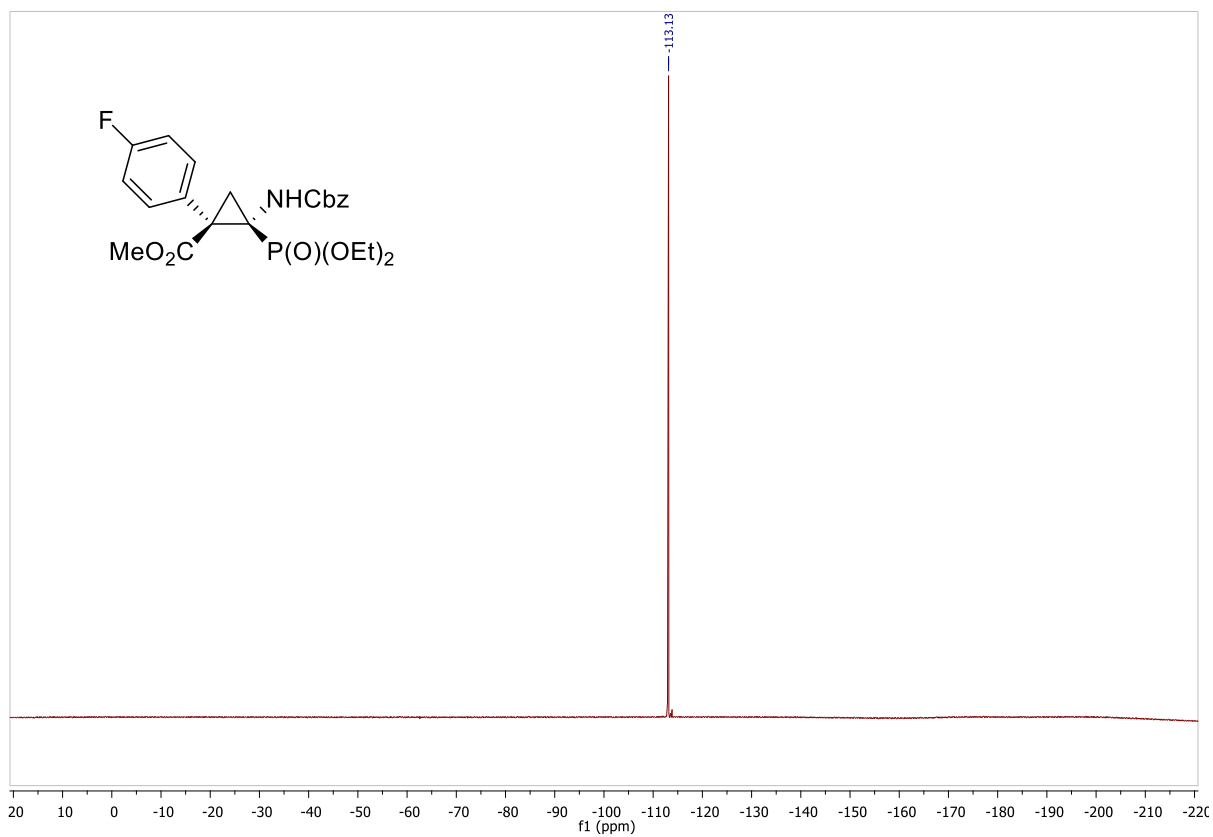

**Compound 26** : methyl (1*S*,2*R*)-2-(((benzyloxy)carbonyl)amino)-1-(4-chlorophenyl)-2-(diethoxy phosphoryl)cyclopropane-1-carboxylate

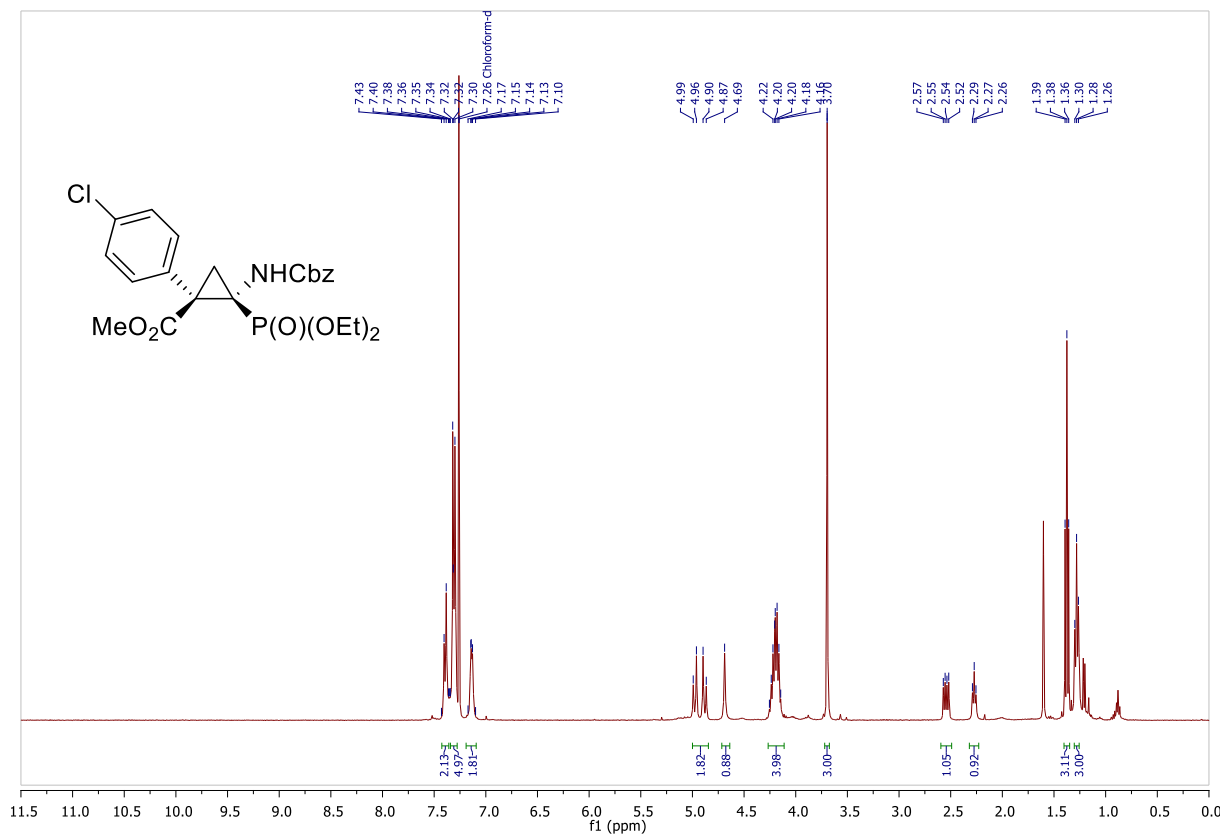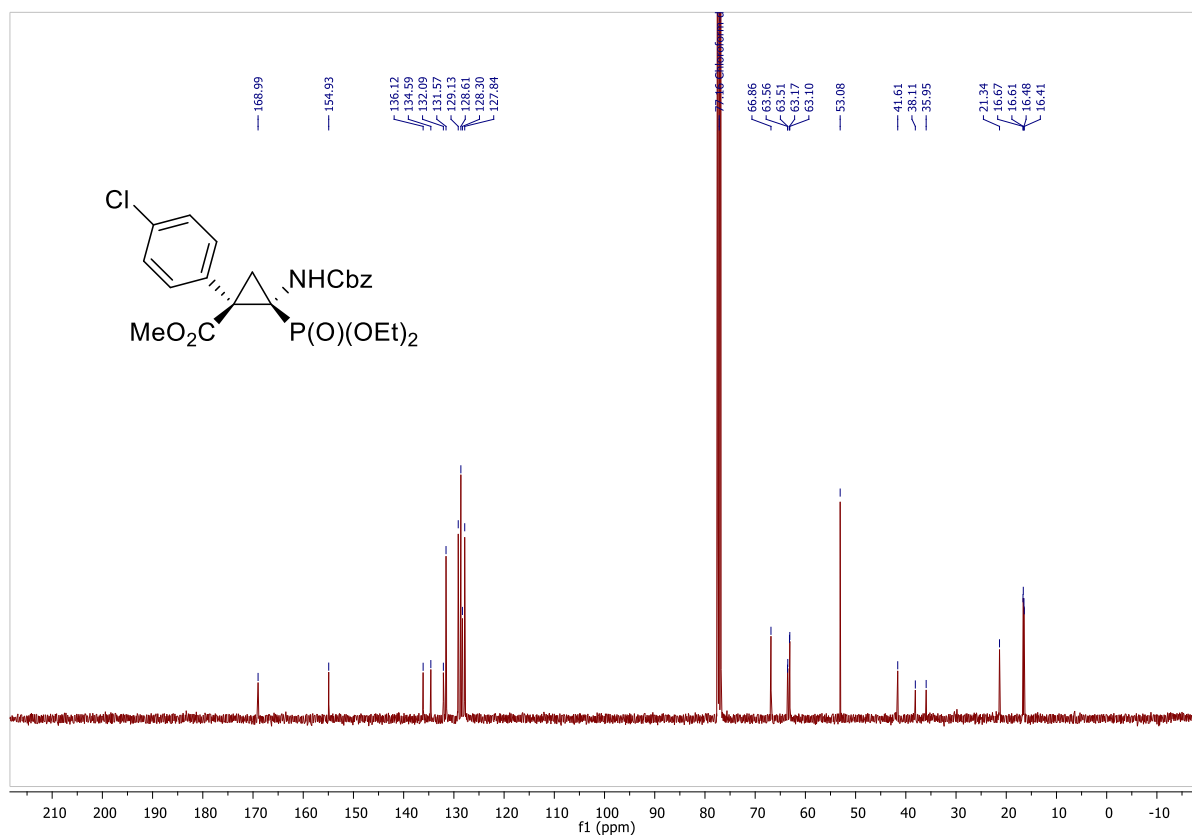

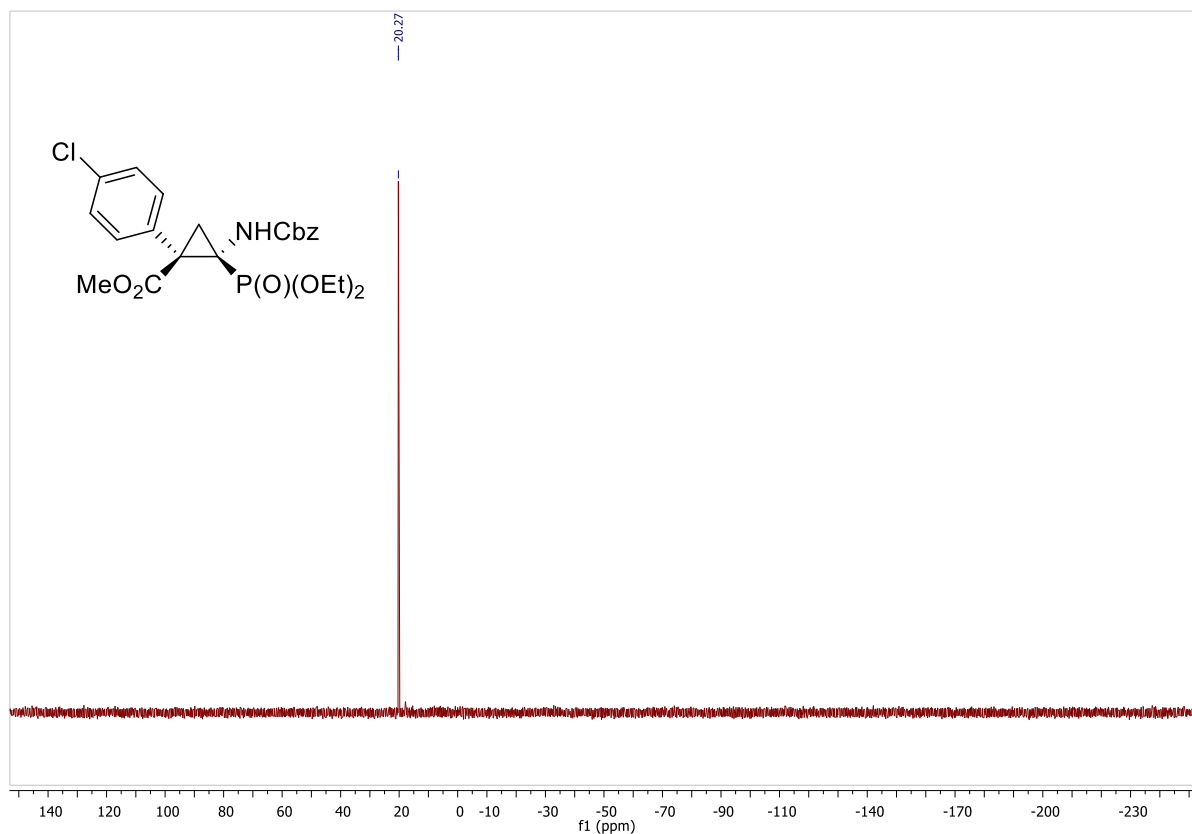

**Compound 27** : methyl (1S,2R)-2-(((benzyloxy)carbonyl)amino)-1-(4-bromophenyl)-2-(diethoxy phosphoryl)cyclopropane-1-carboxylate

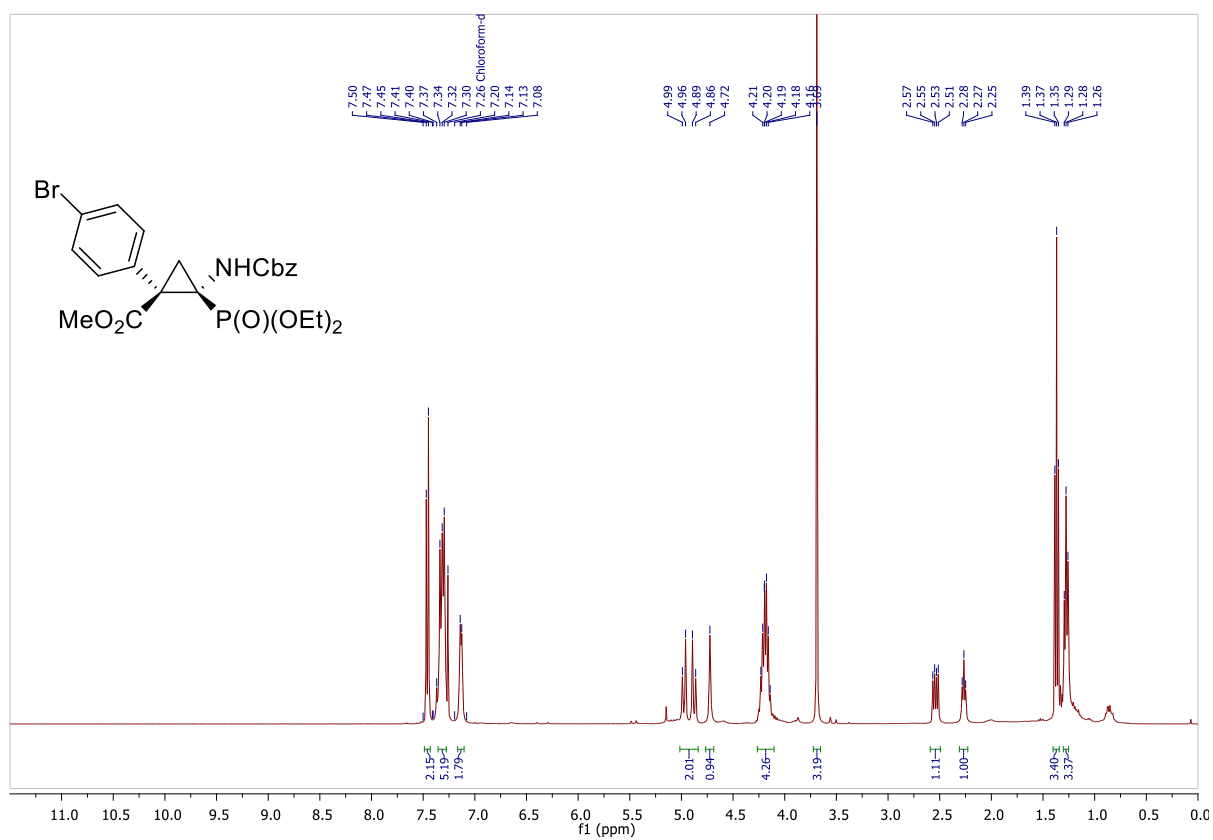

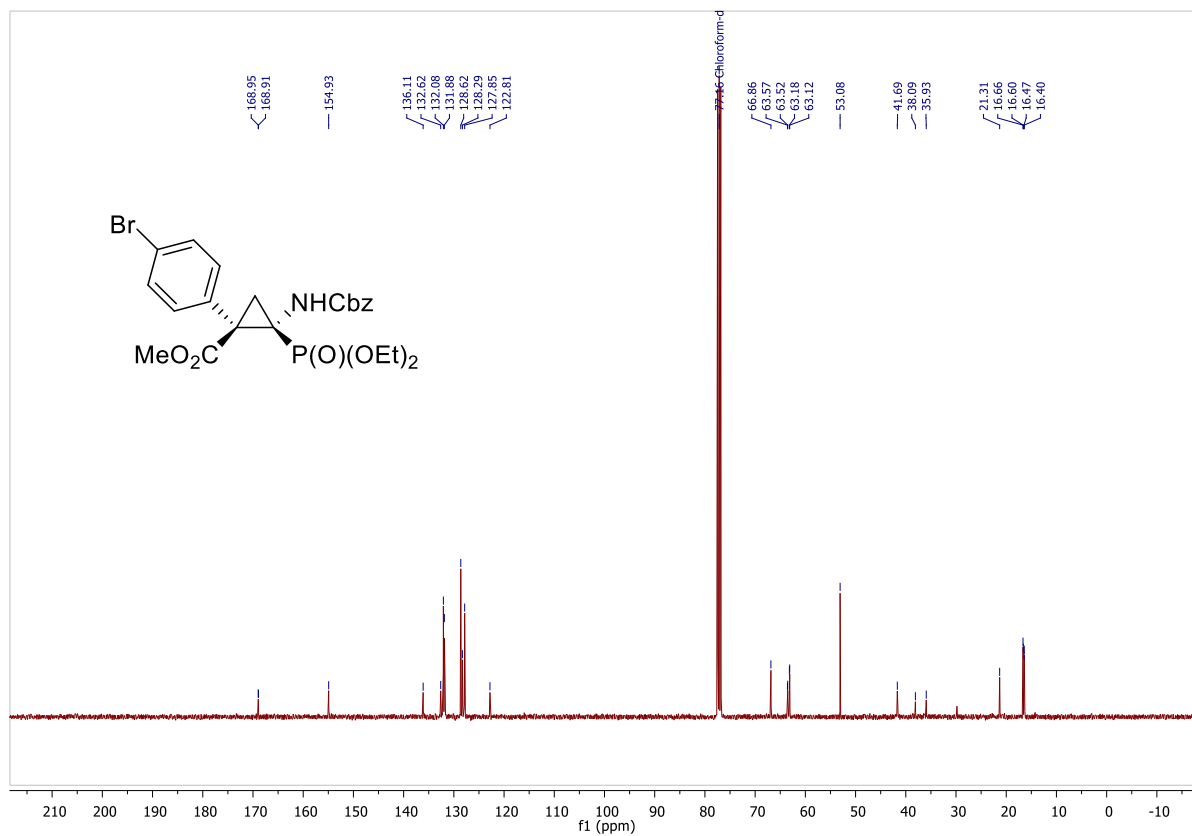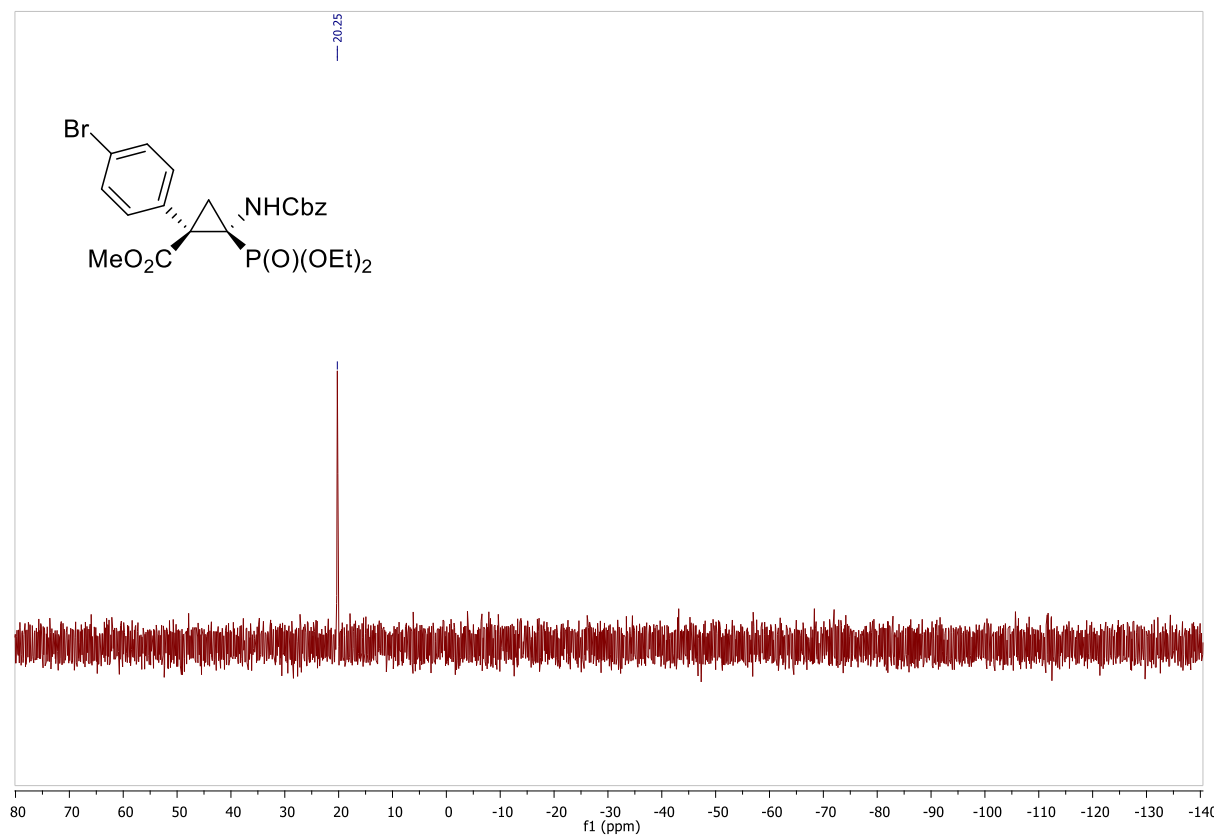

**Compound 28**: ethyl (1*S*,2*R*)-2-(((benzyloxy)carbonyl)amino)-1-(4-bromophenyl)-2-(diethoxyphosphoryl)cyclopropane-1-carboxylate

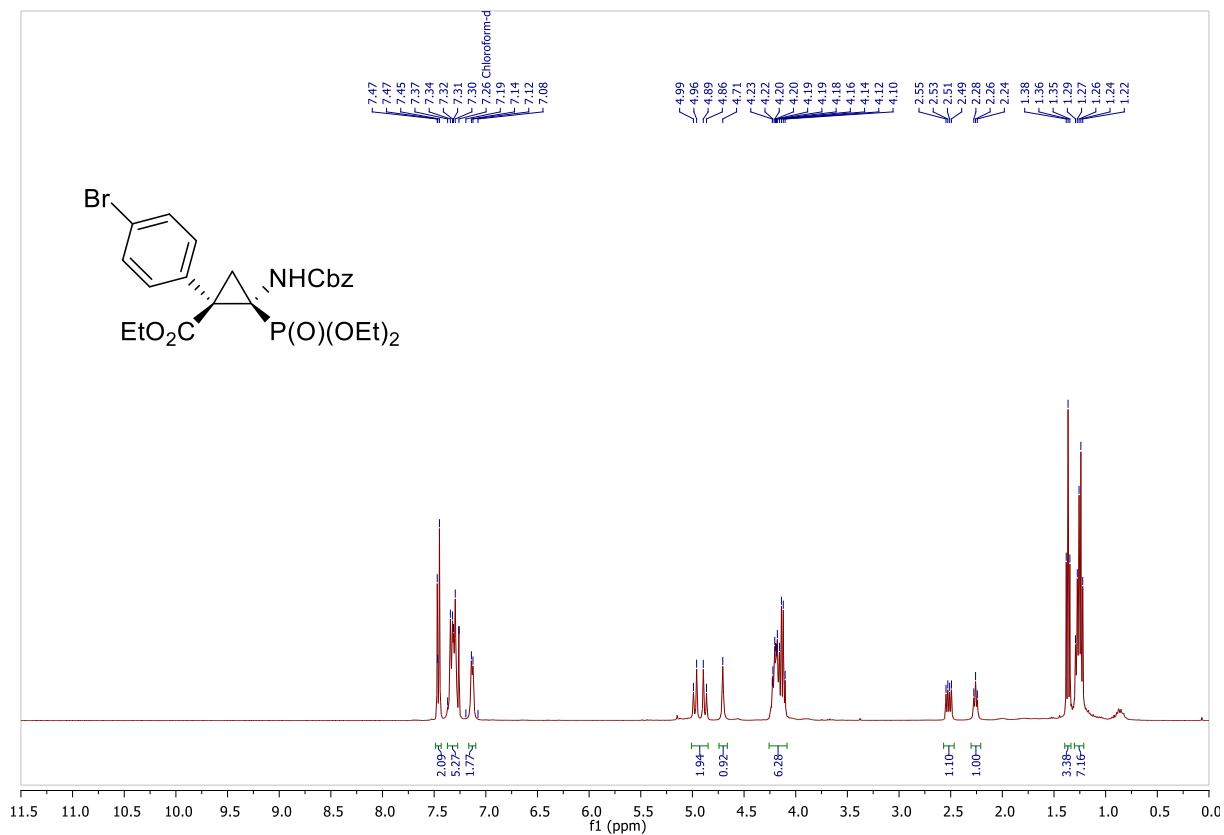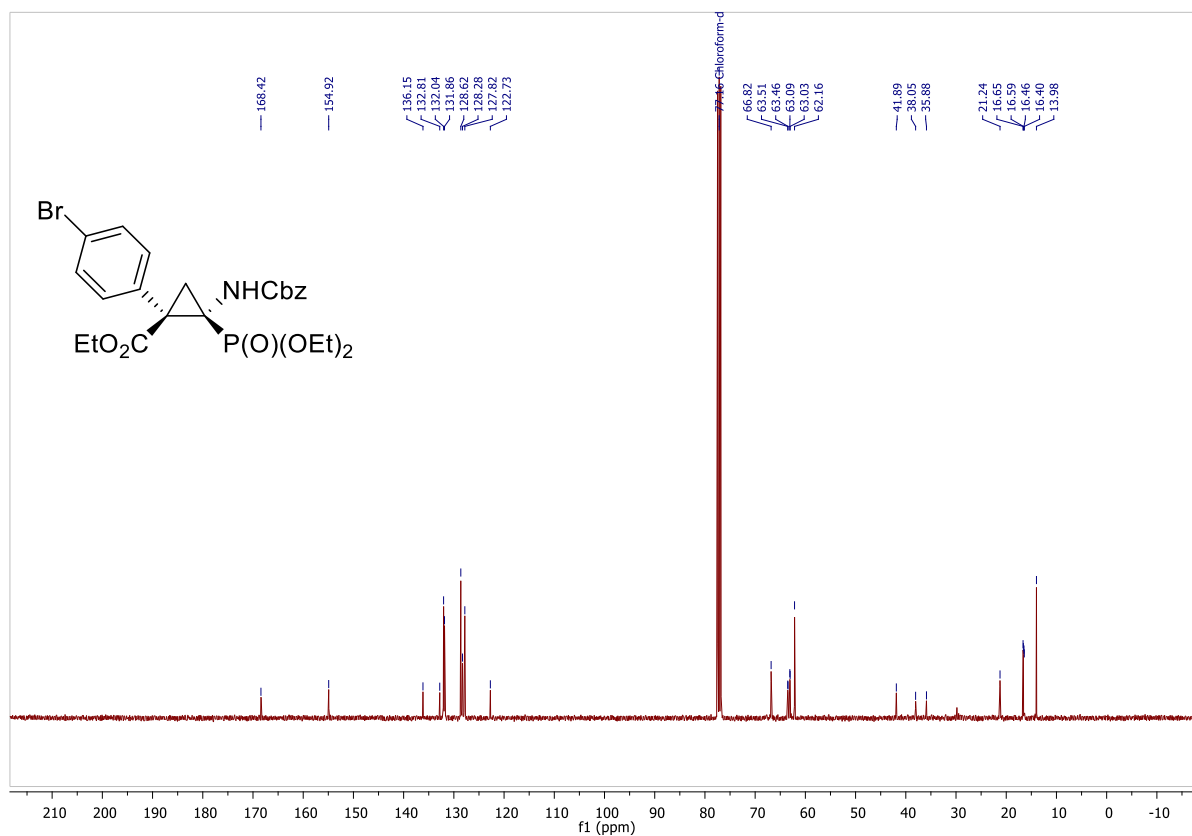



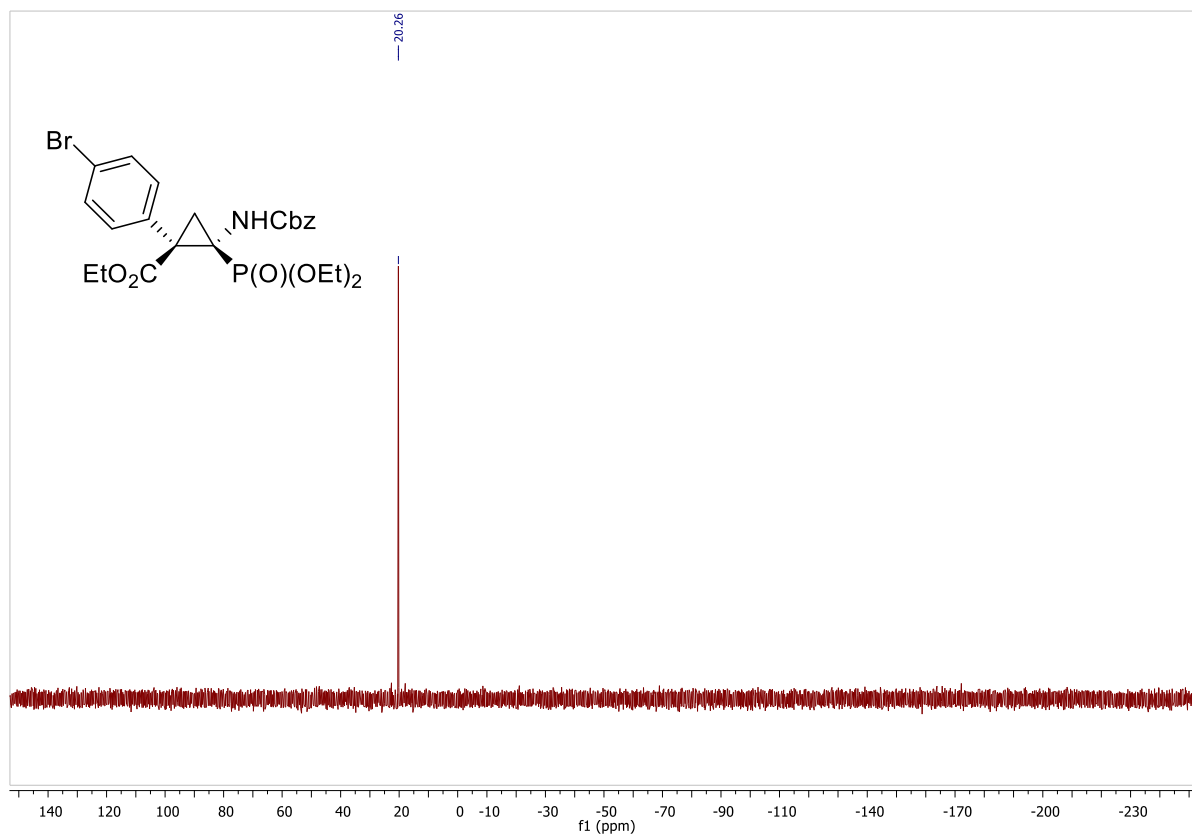

**Compound 29** : methyl (1*S*,2*R*)-2-(((benzyloxy)carbonyl)amino)-2-(diethoxyphosphoryl)-1-(4-iodophenyl)cyclopropane-1-carboxylate

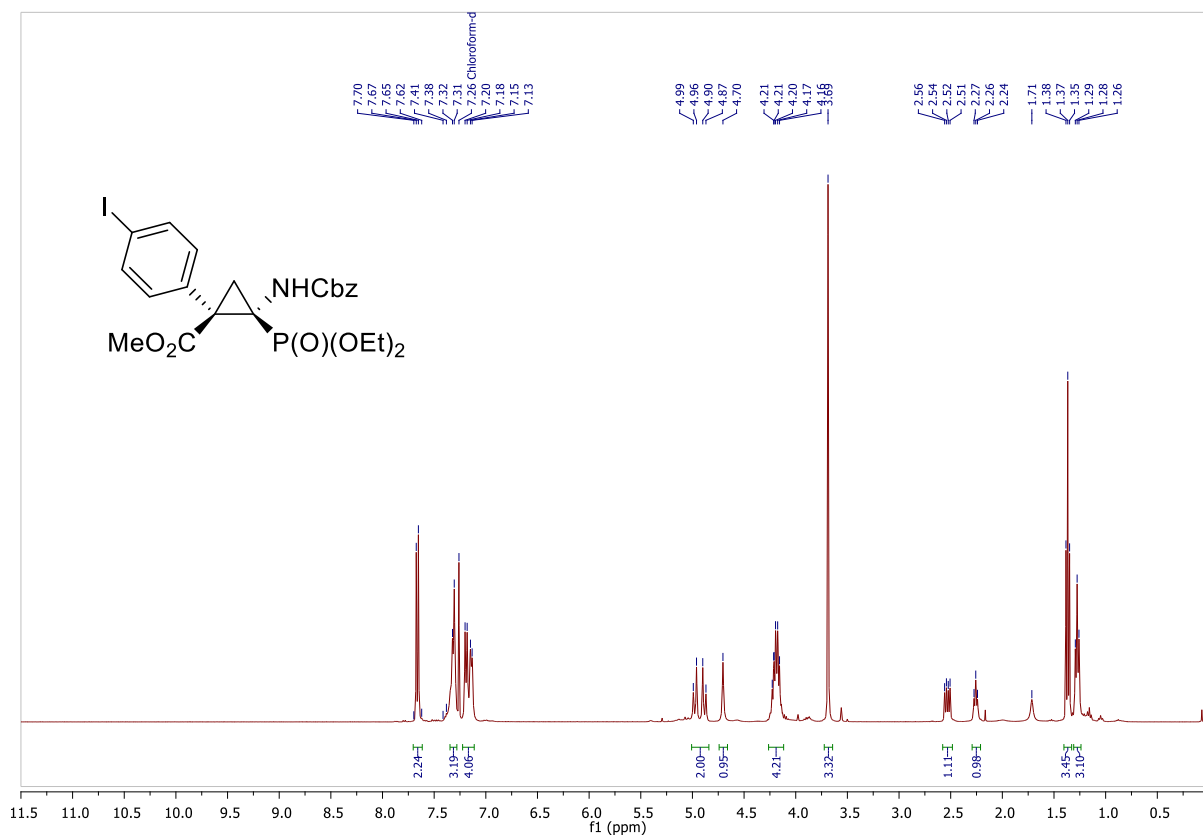

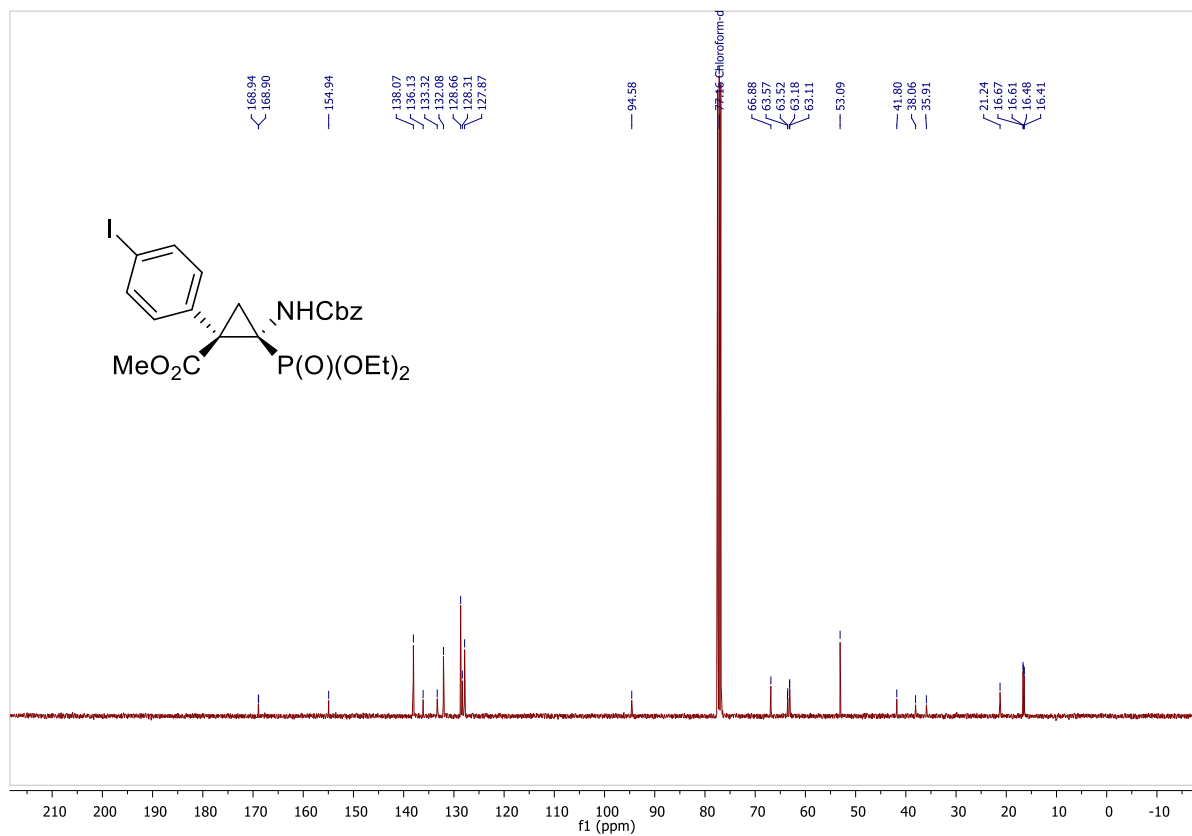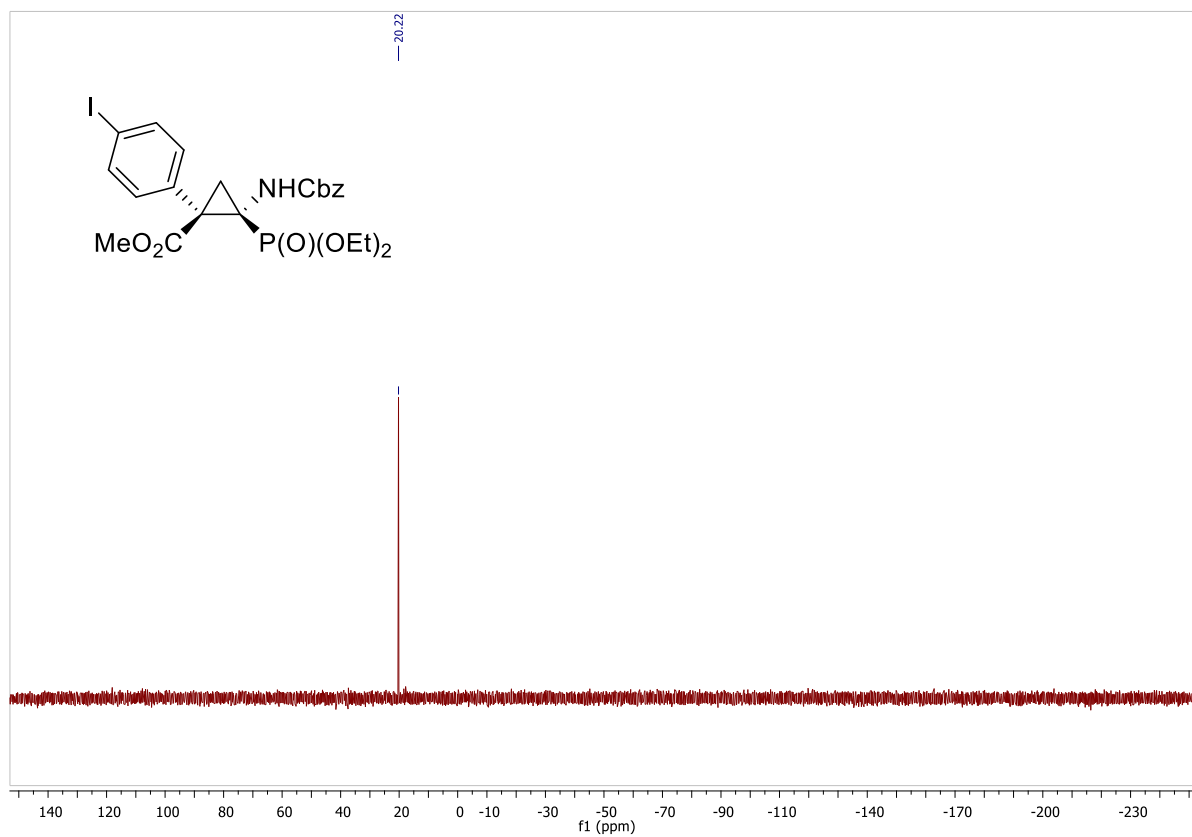

**Compound 30:** methyl (1*S*,2*R*)-2-(((benzyloxy)carbonyl)amino)-2-(diethoxyphosphoryl)-1-(4-(trifluoromethyl)phenyl)cyclopropane-1-carboxylate

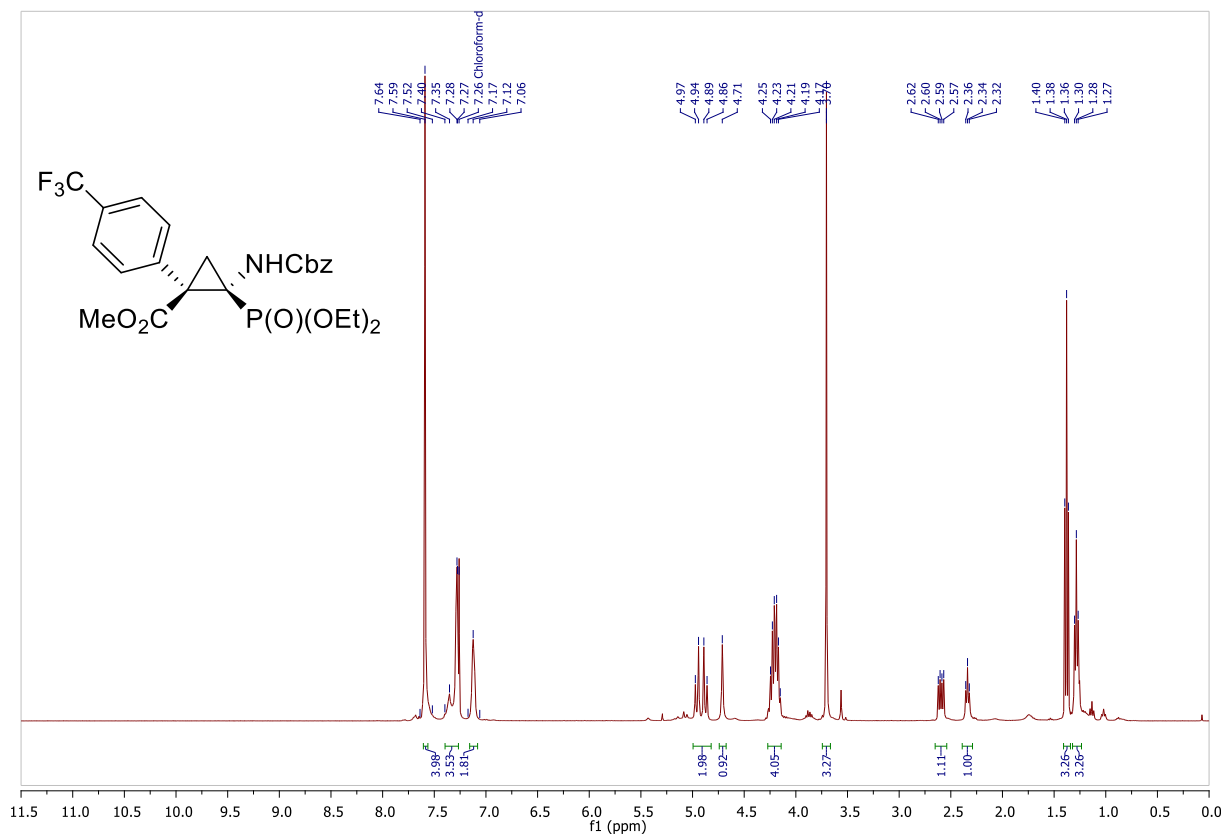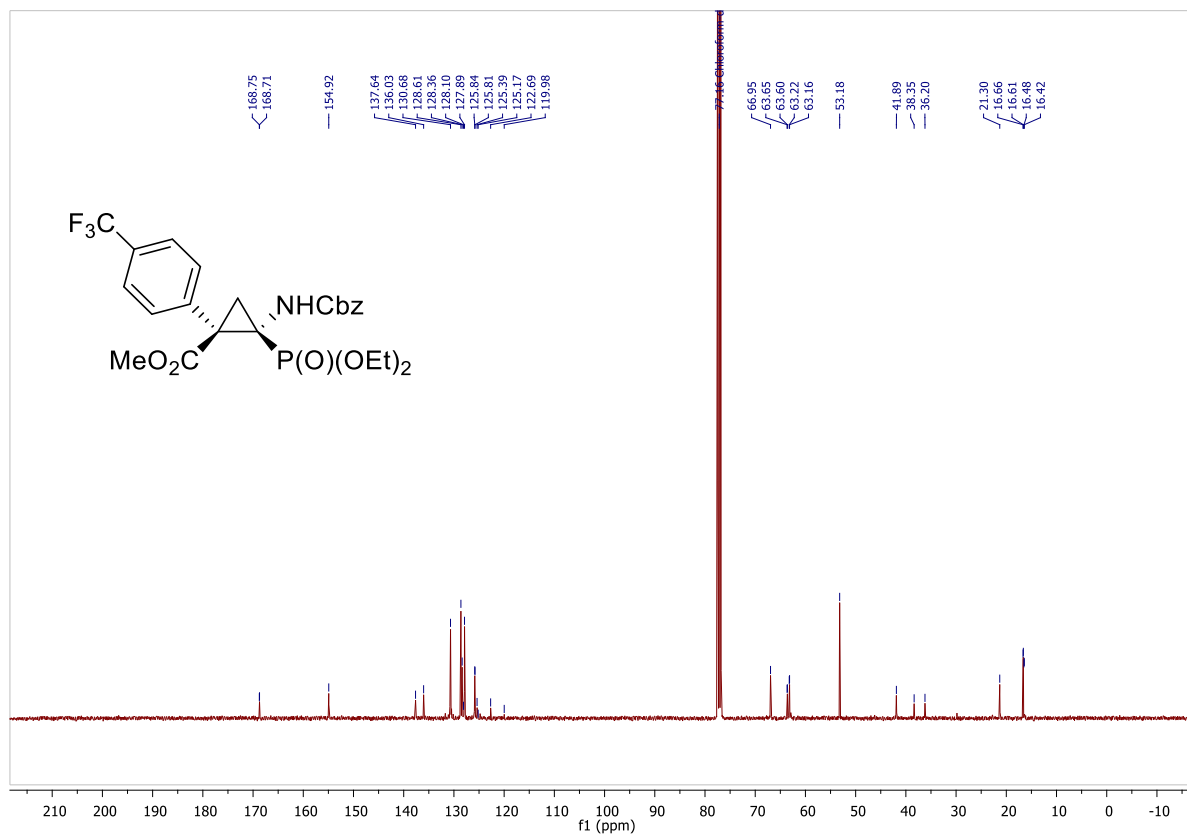

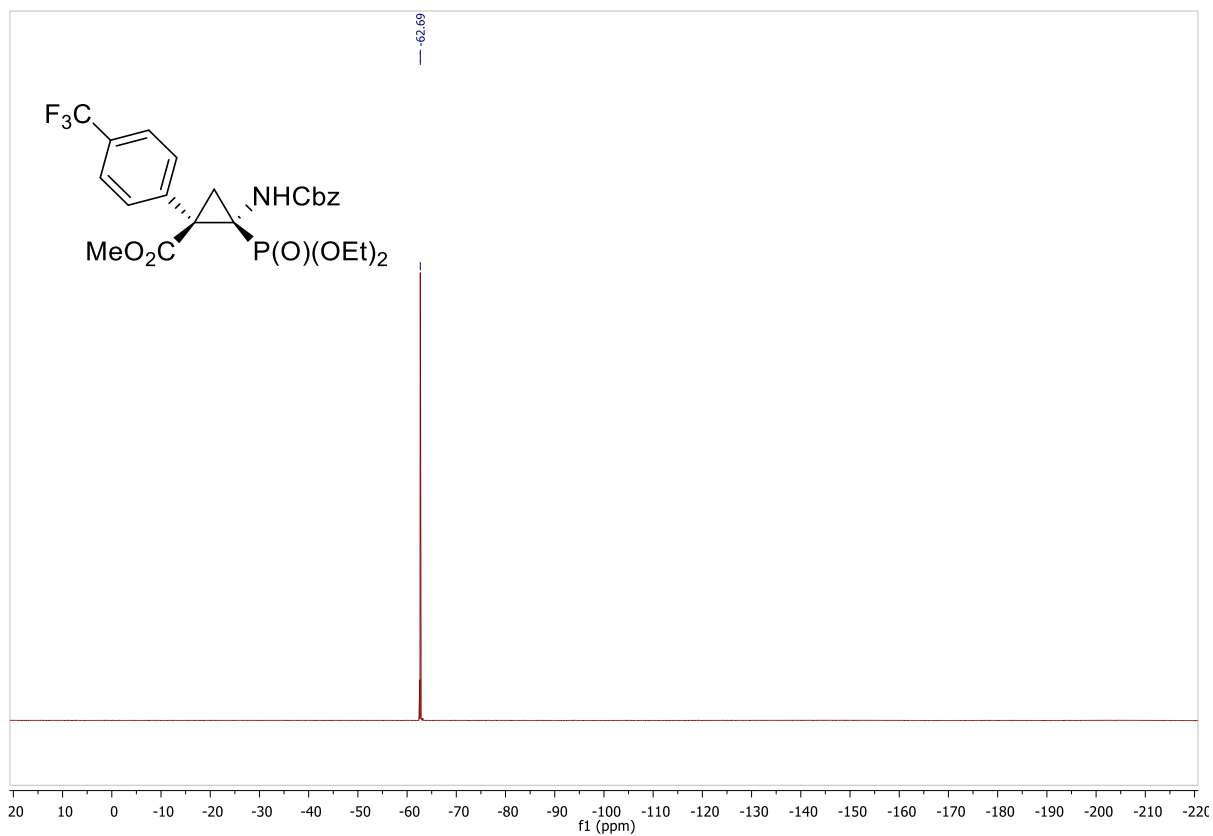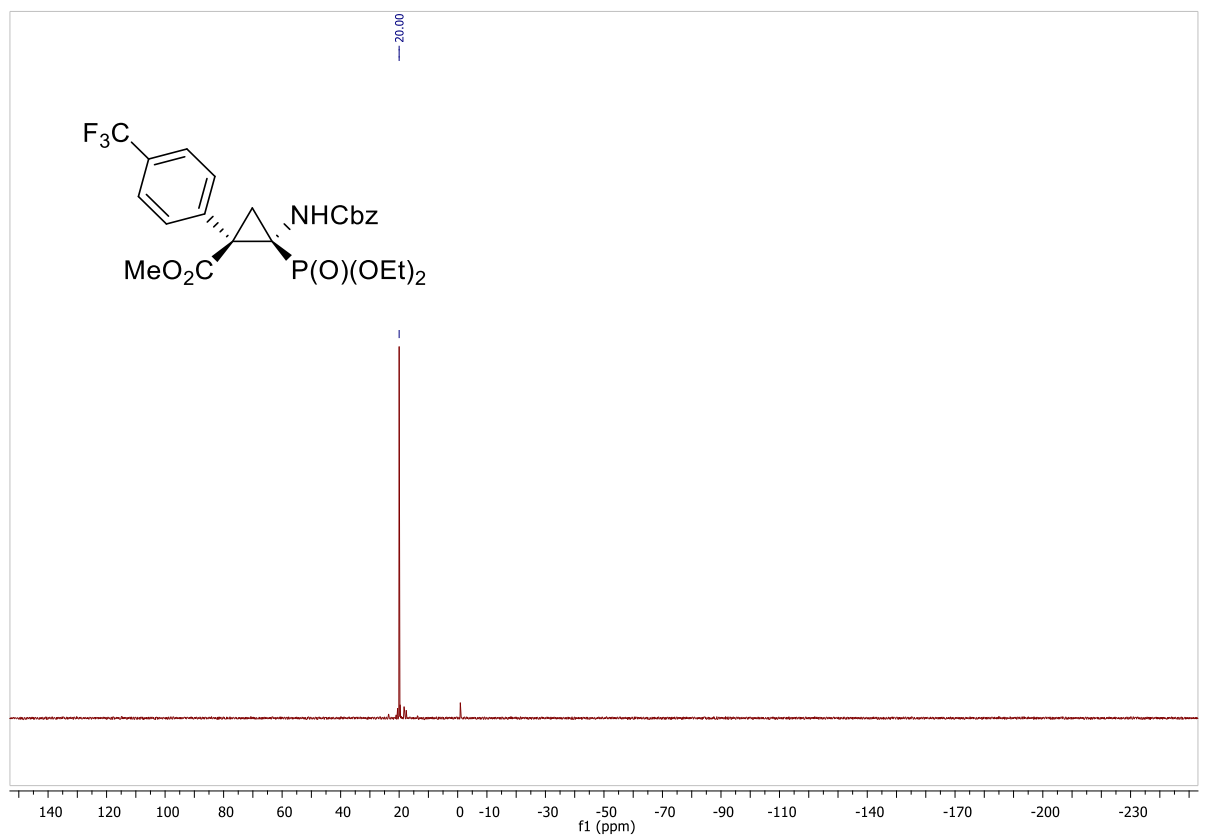

**Compound 31** : ethyl (1*S*,2*R*)-2-(((benzyloxy)carbonyl)amino)-2-(diethoxyphosphoryl)-1-(4-(trifluoromethyl)phenyl)cyclopropane-1-carboxylate

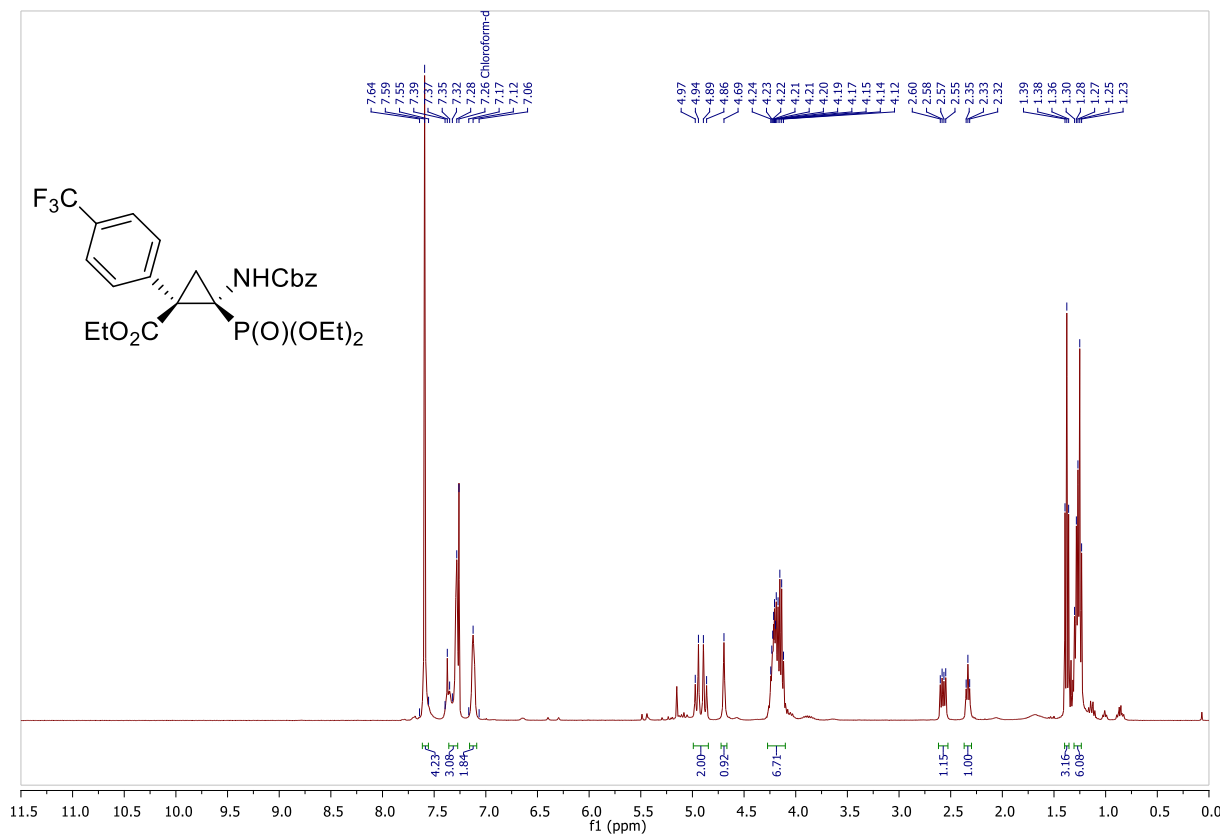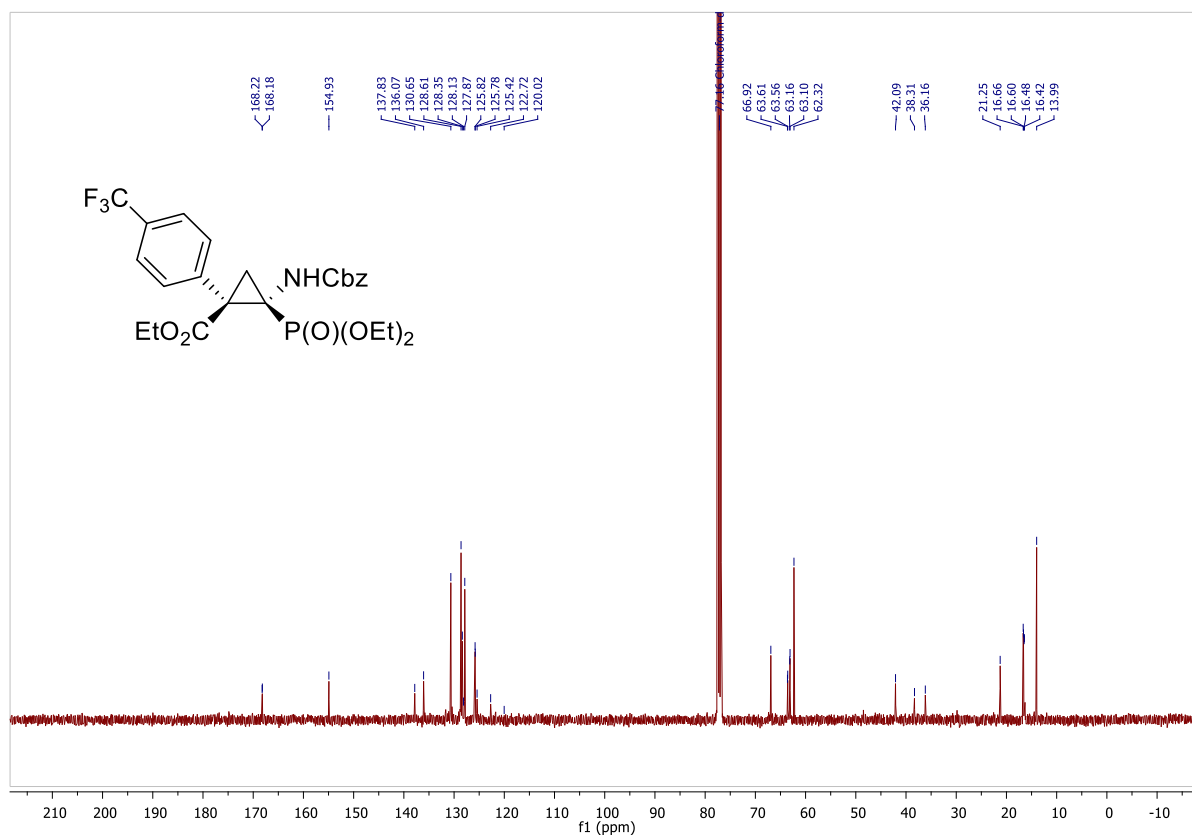

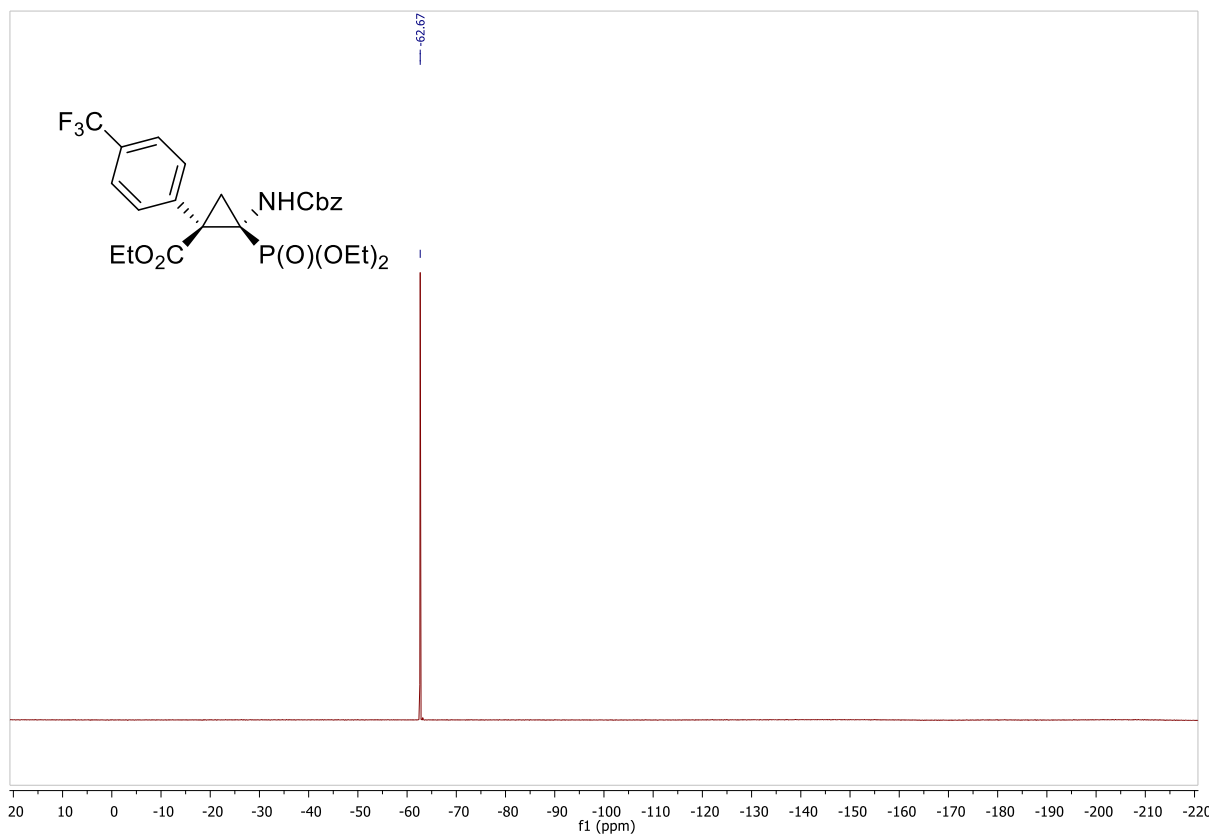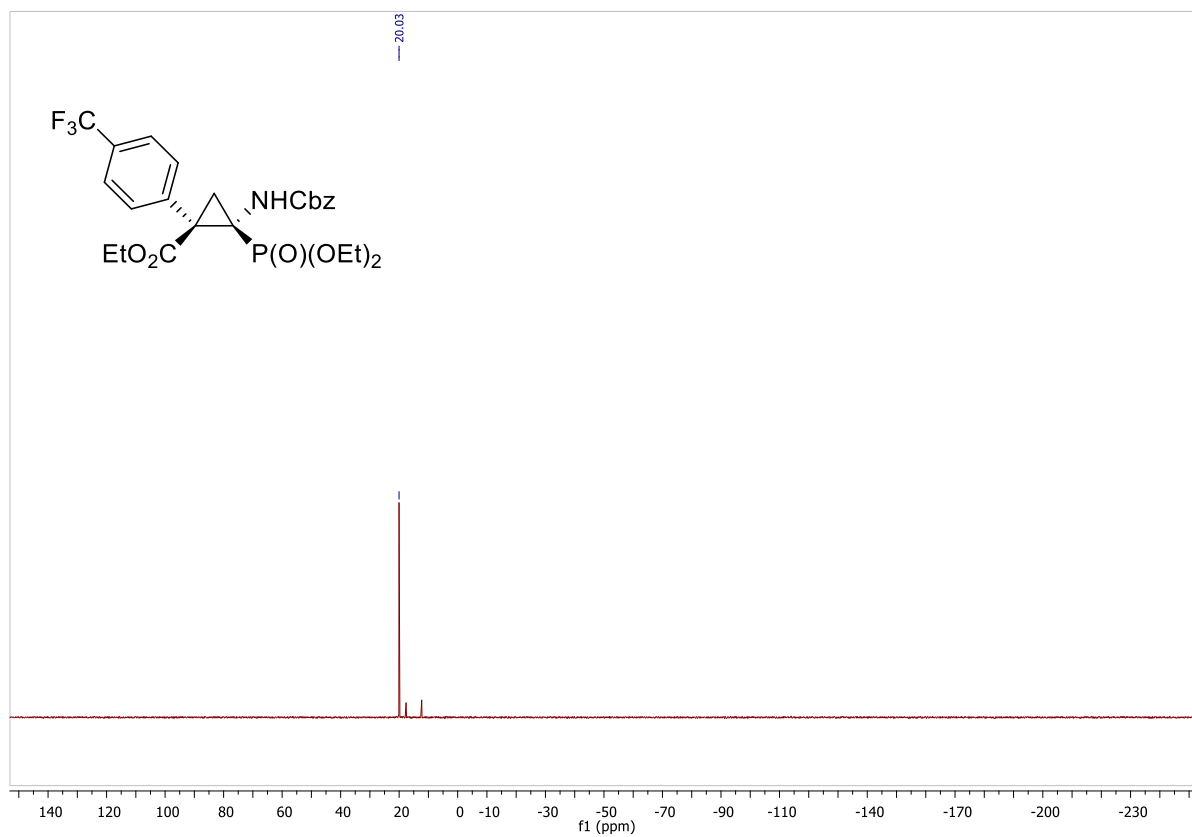

**Compound 32** : methyl (1*S*,2*R*)-2-(((benzyloxy)carbonyl)amino)-2-(diethoxyphosphoryl)-1-(*m*-tolyl)cyclopropane-1-carboxylate

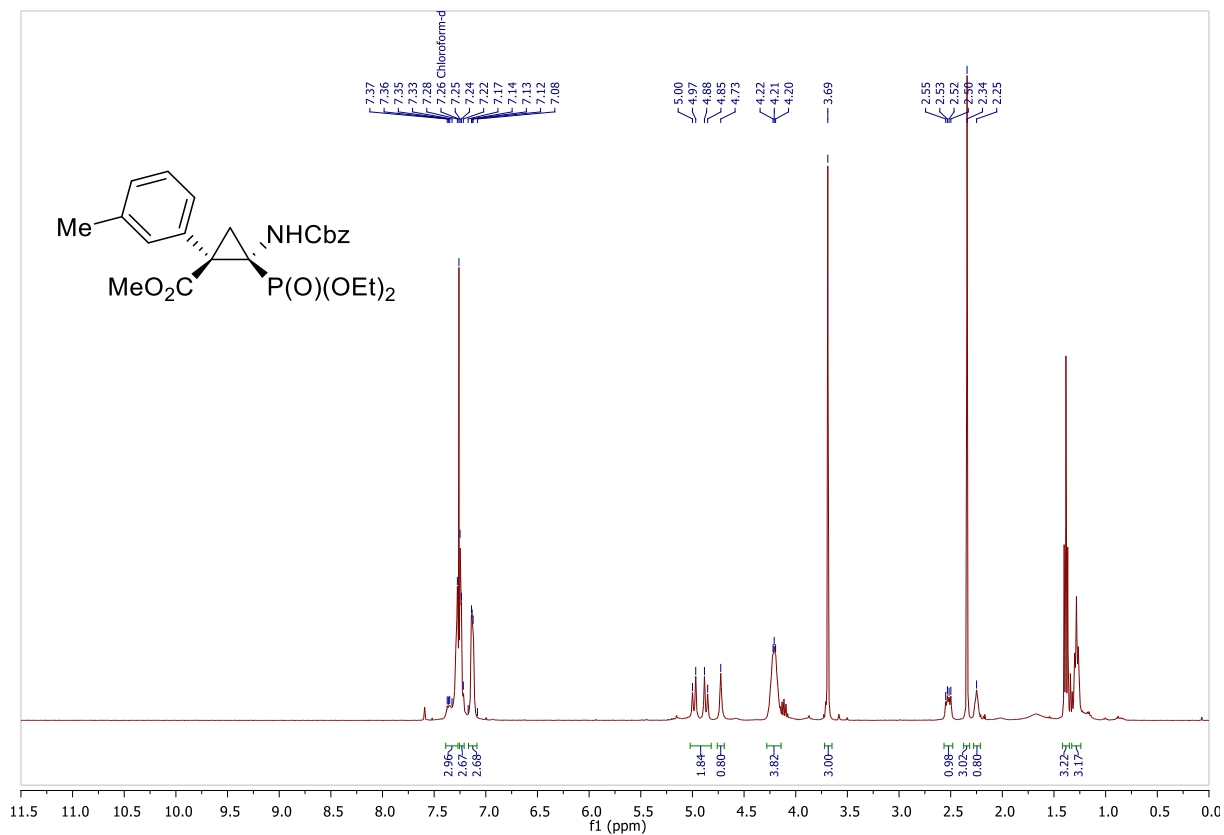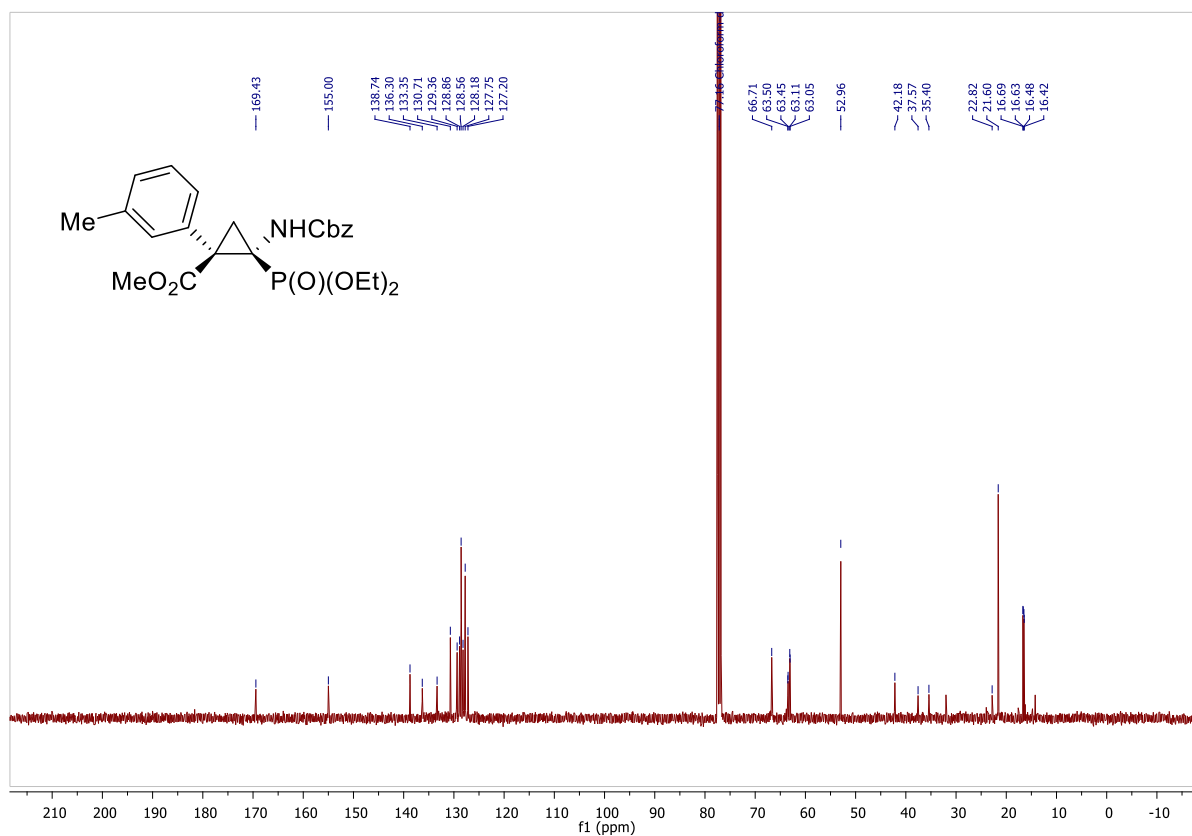

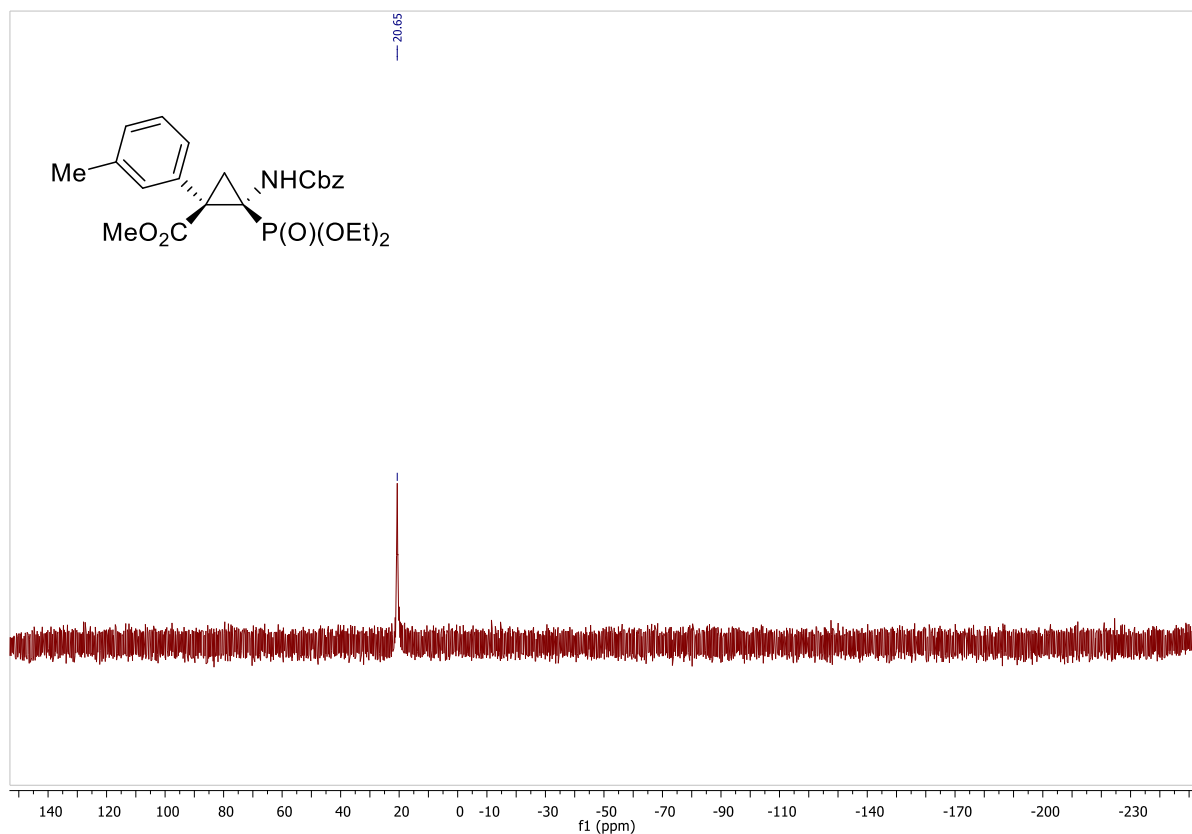

**Compound 33** : ethyl (1S,2R)-2-(((benzyloxy)carbonyl)amino)-2-(diethoxyphosphoryl)-1-(3-methoxyphenyl)cyclopropane-1-carboxylate

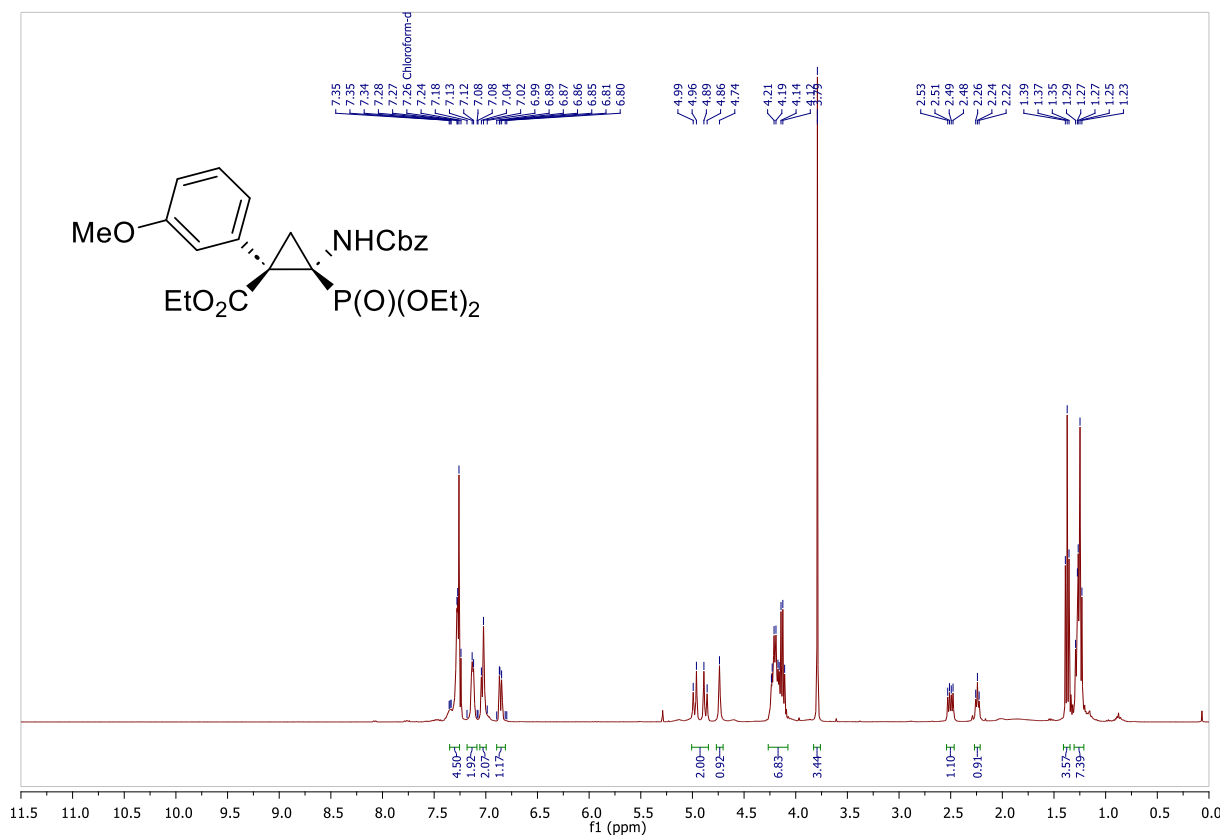



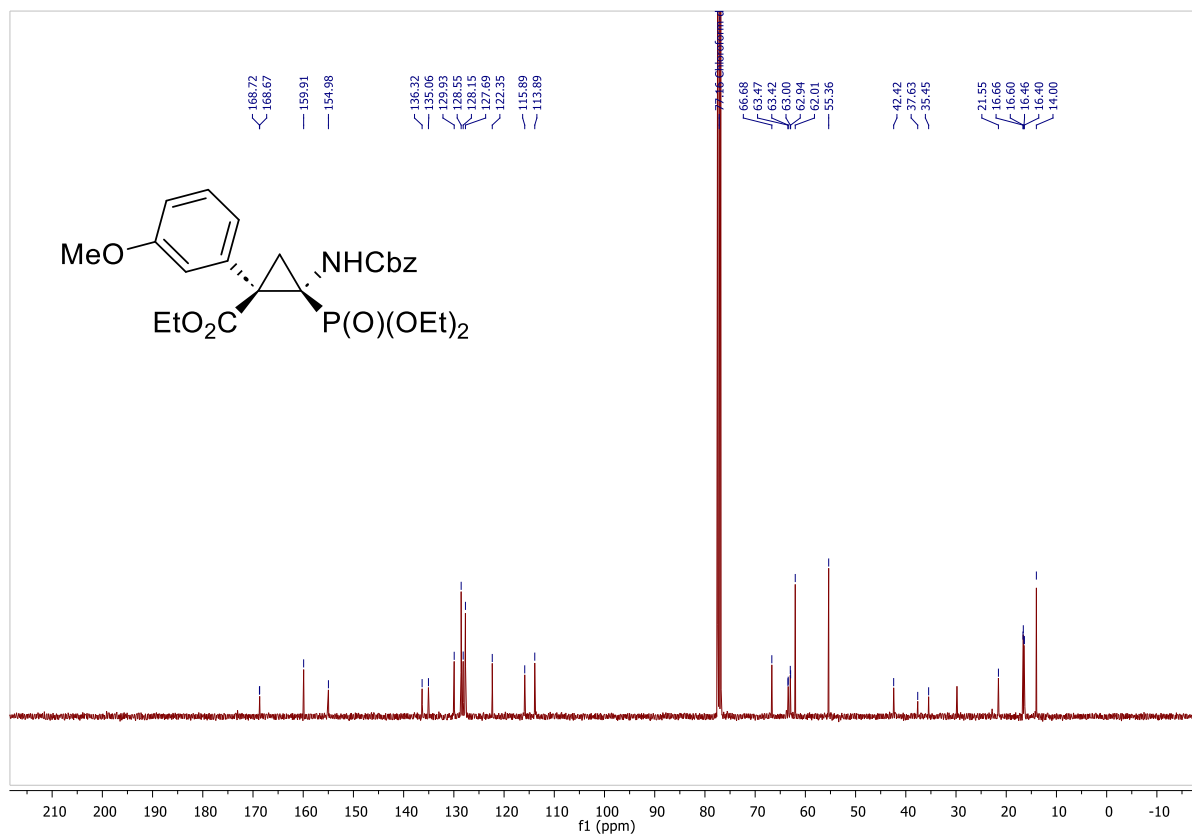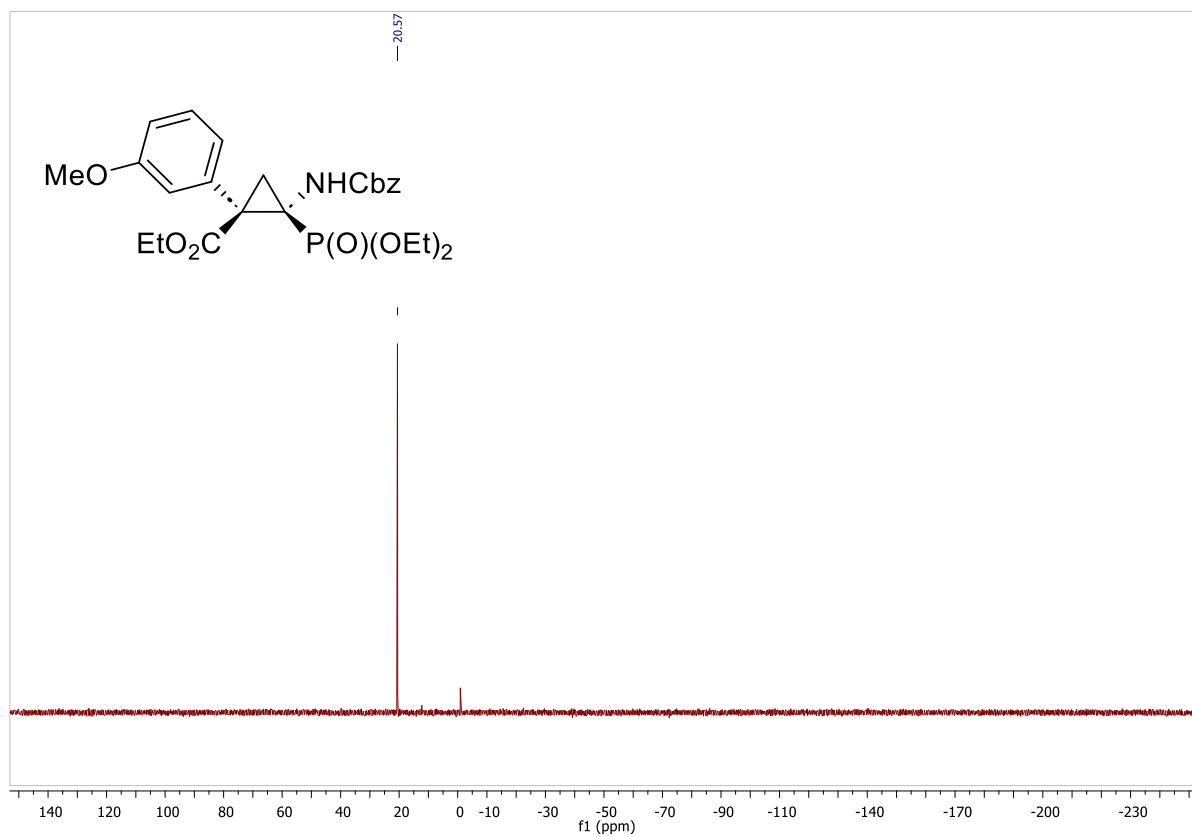

**Compound 34 : methyl (1S,2R)-2-(((benzyloxy)carbonyl)amino)-2-(diethoxyphosphoryl)-1-(3-(trifluoromethyl)phenyl)cyclopropane-1-carboxylate**

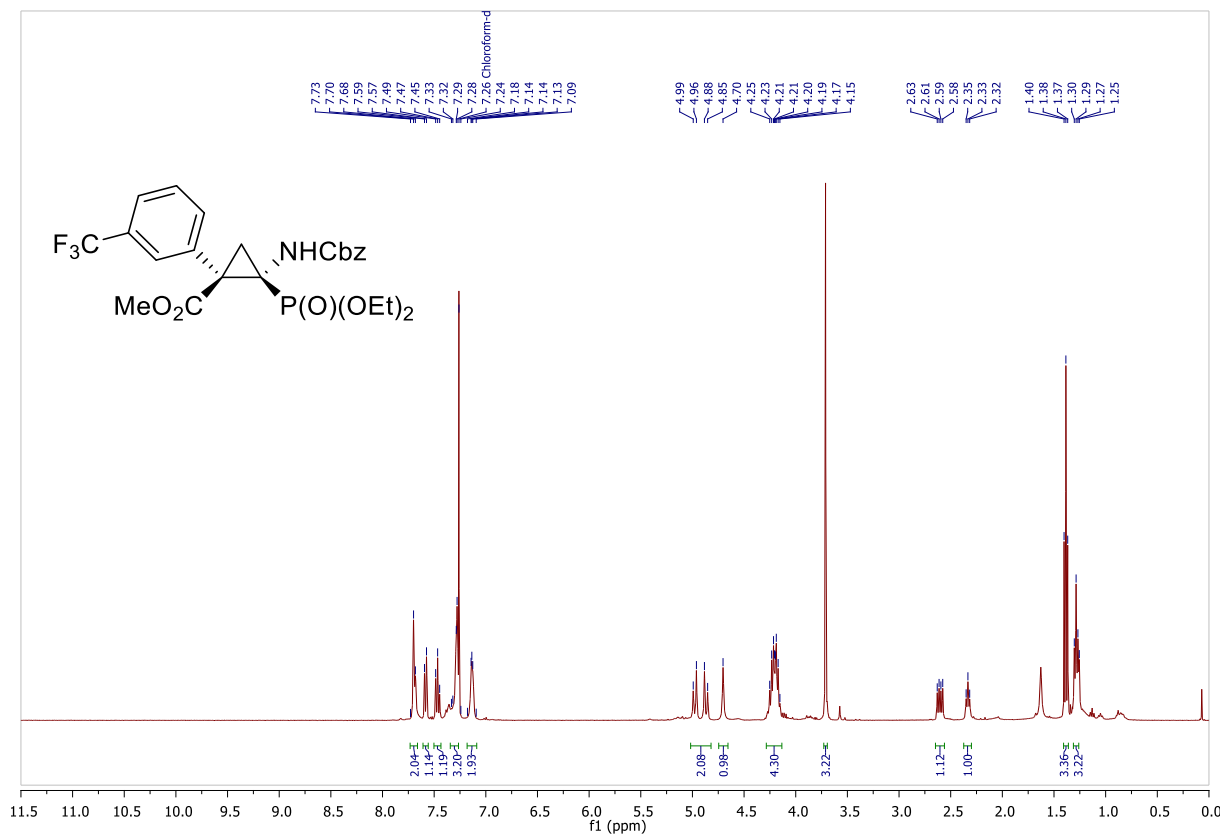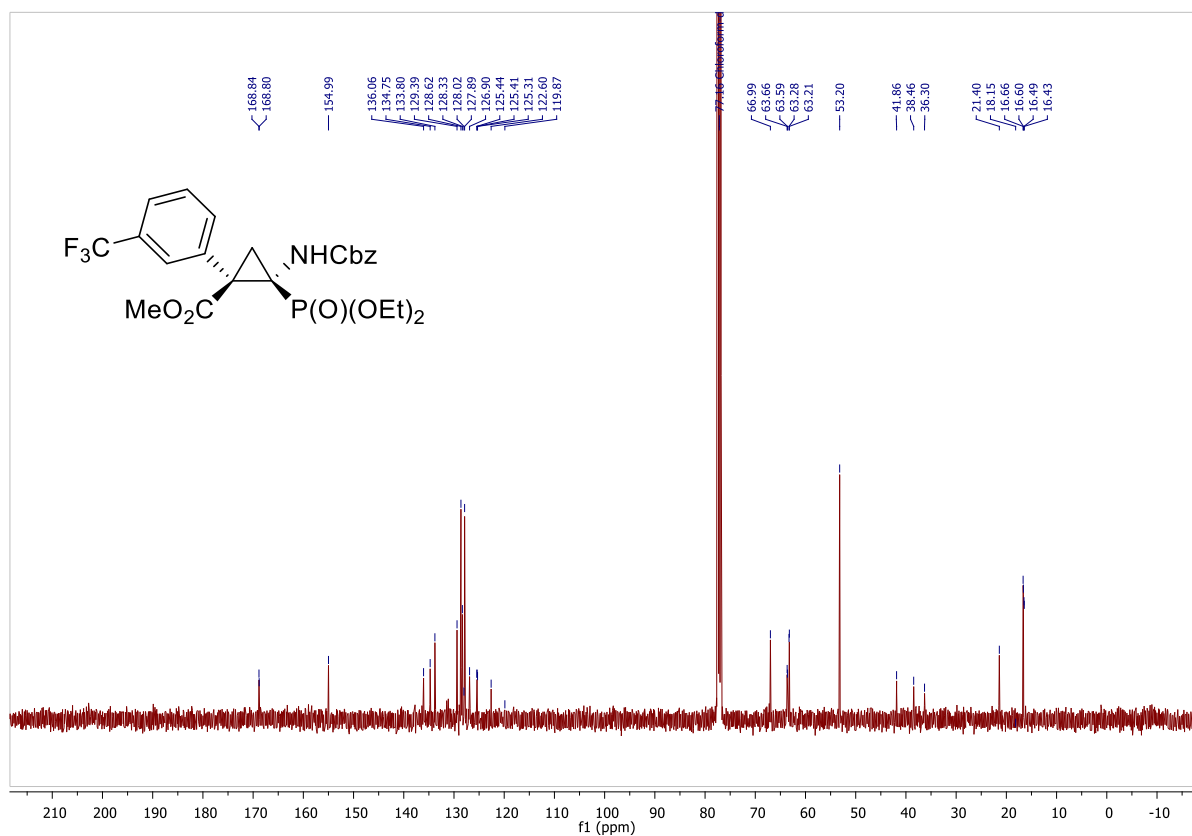

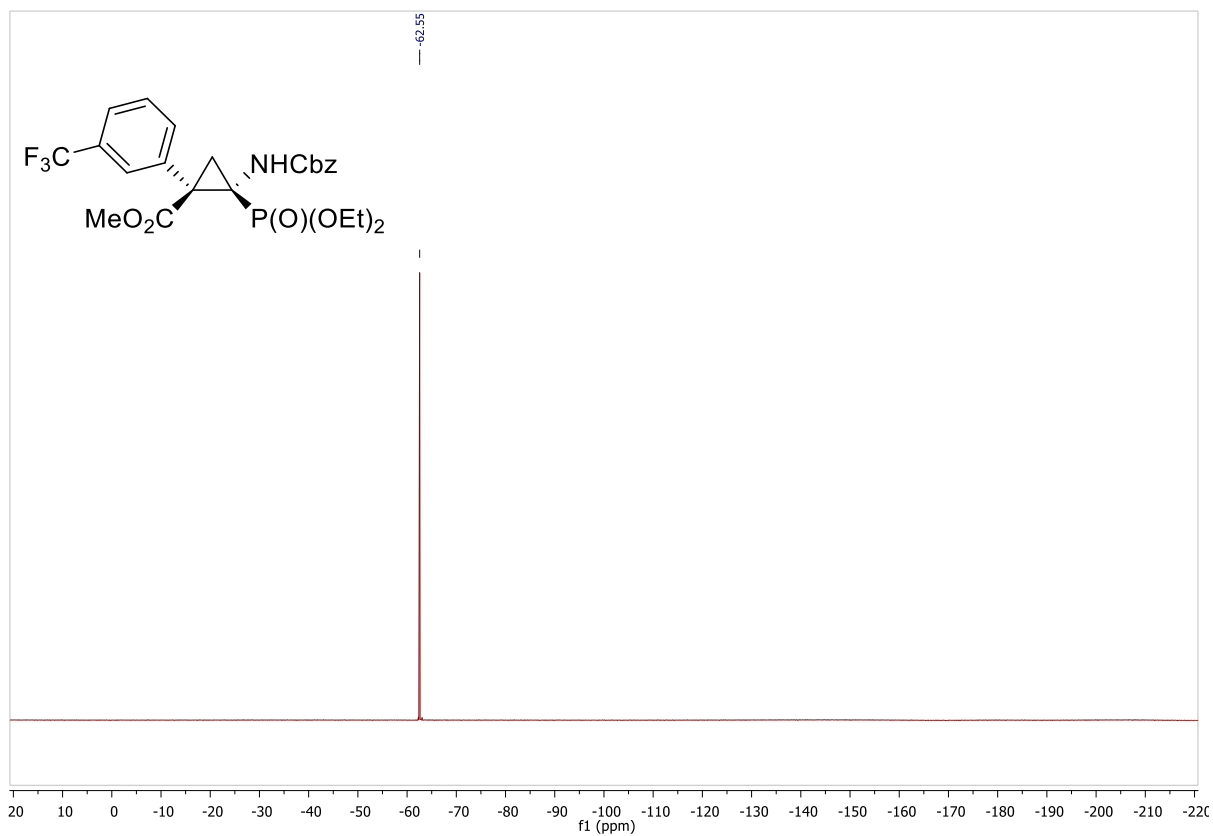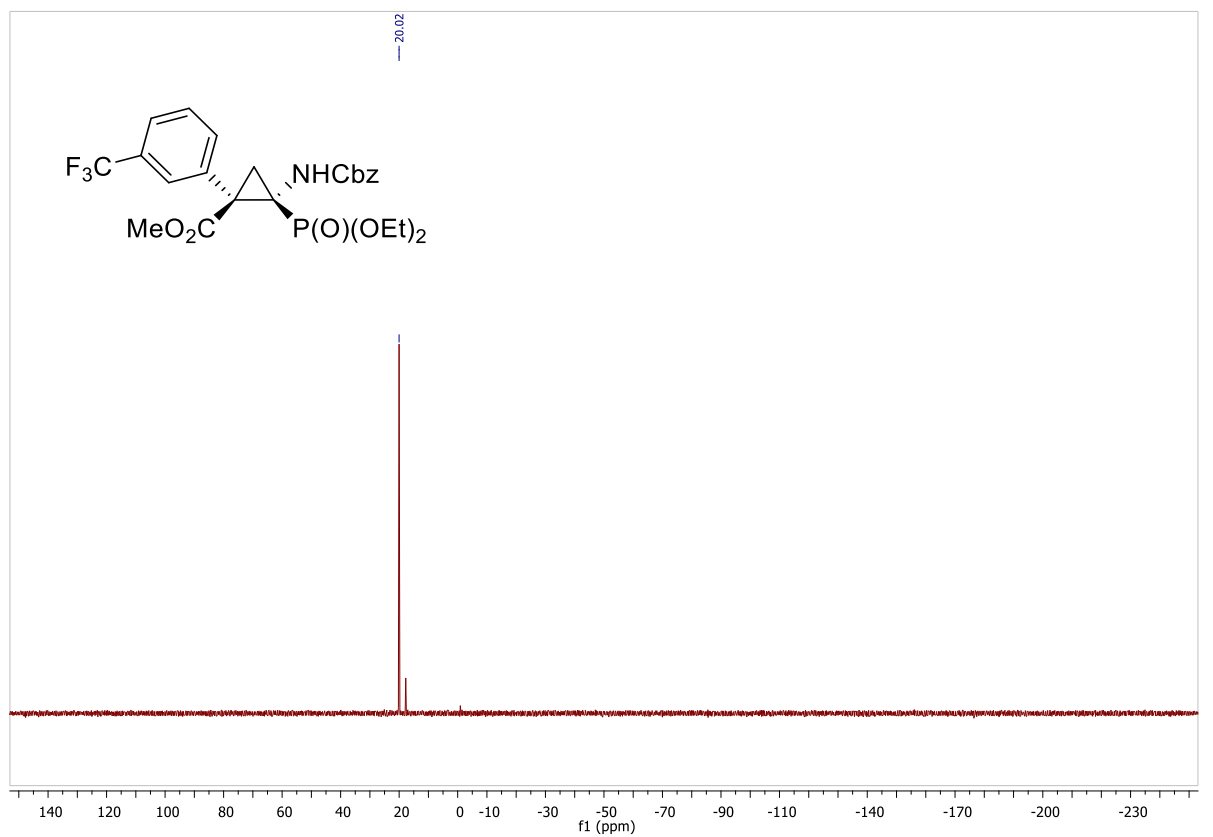

**Compound 35:** ethyl (1*S*,2*R*)-2-(((benzyloxy)carbonyl)amino)-1-(3,4-dichlorophenyl)-2-(diethoxyphosphoryl)cyclopropane-1-carboxylate

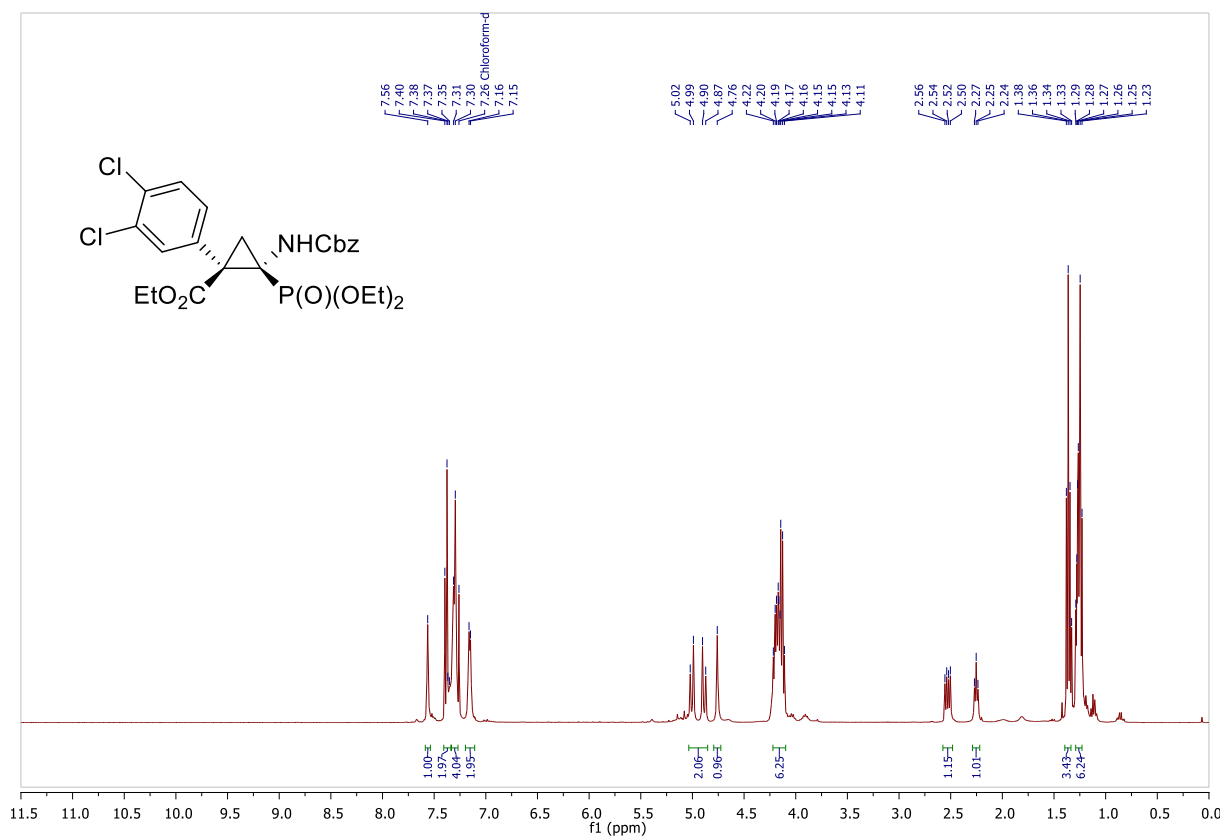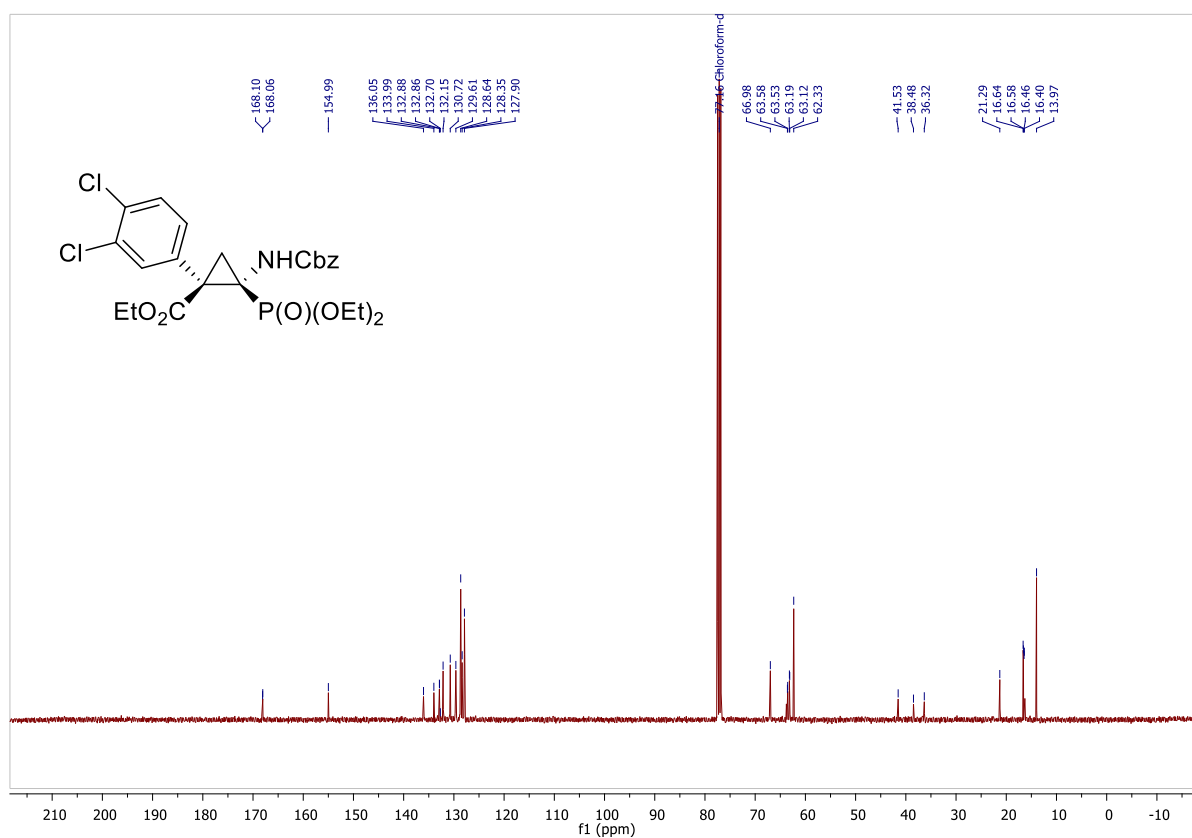

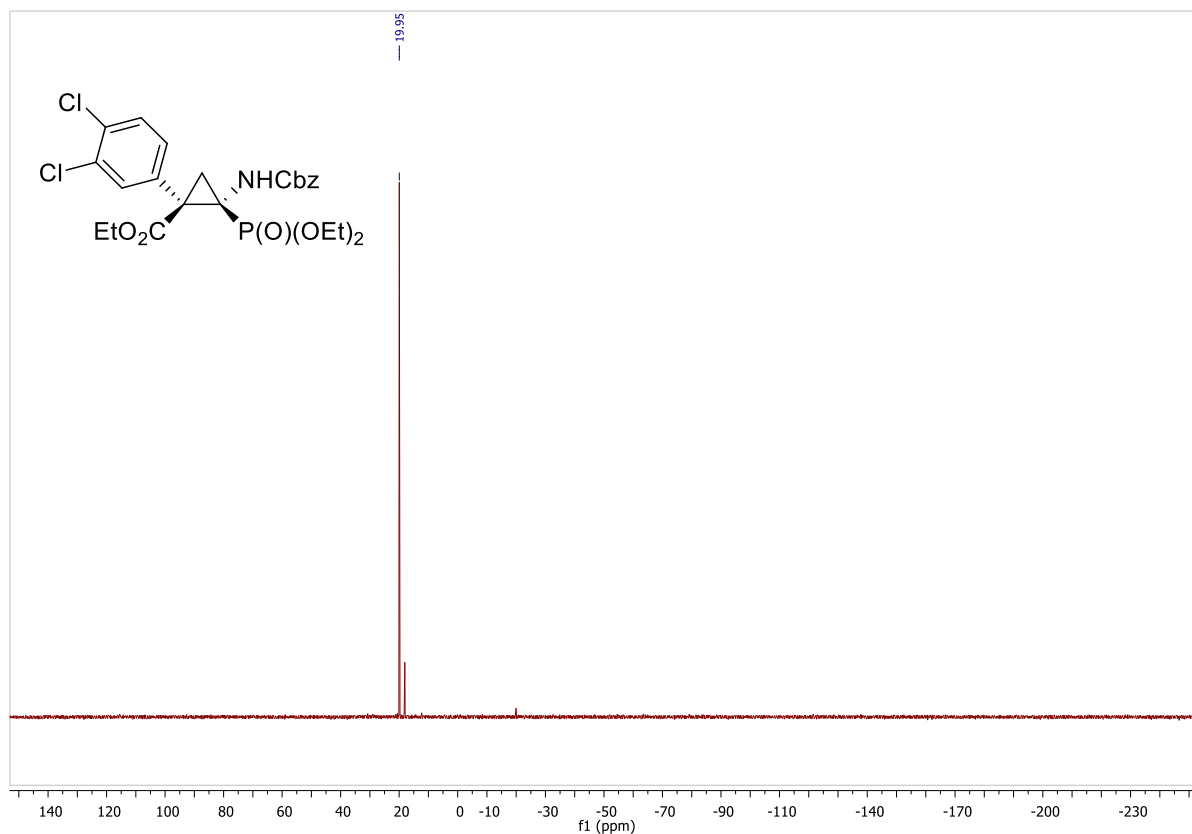

**Compound 36** : dimethyl (1S,2S)-1-([1,1'-biphenyl]-4-yl)-2-(bis(tert-butoxycarbonyl)amino)cyclopropane-1,2-dicarboxylate

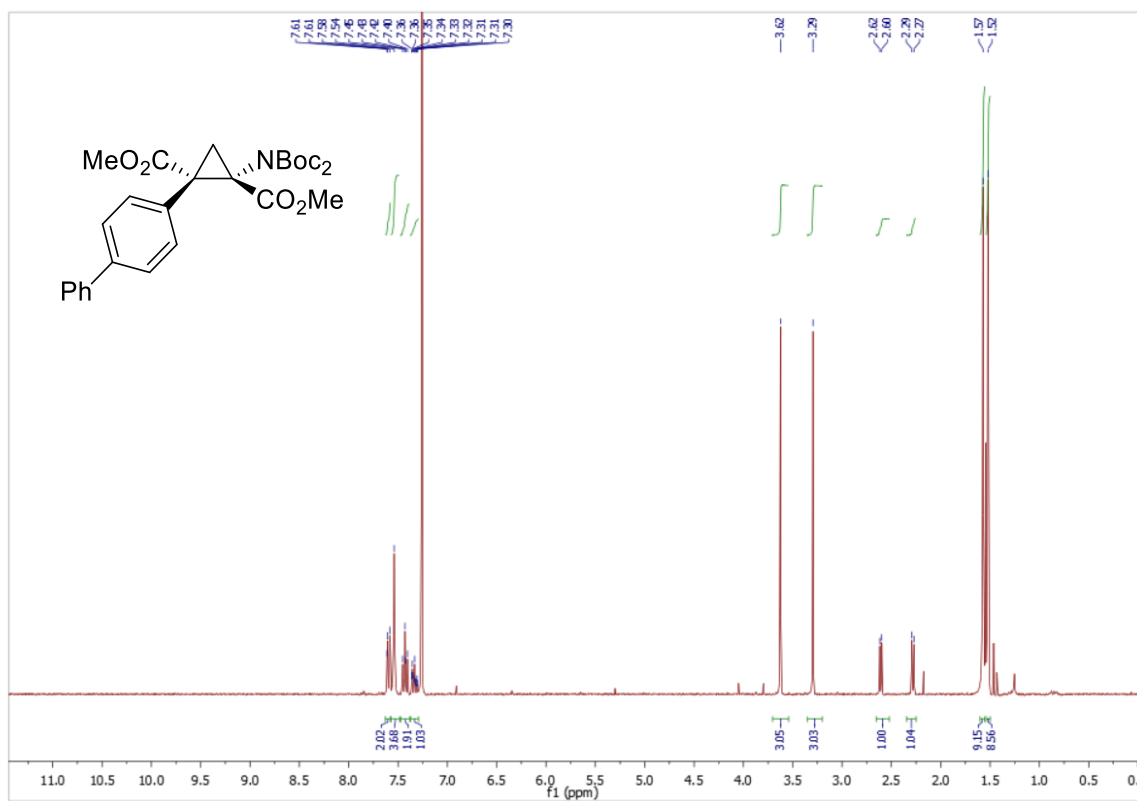

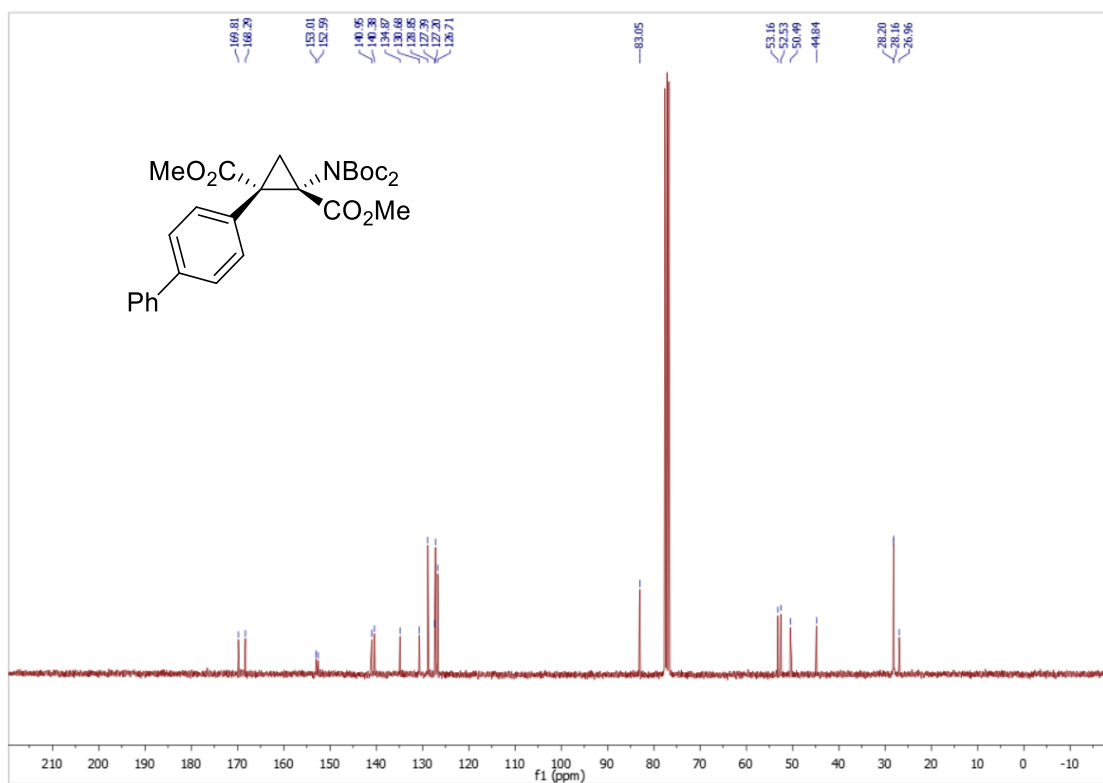

**Compound 37**: dimethyl (1*S*,2*S*)-1-((tert-butoxycarbonyl)amino)-2-(4-iodophenyl)cyclopropane-1,2-dicarboxylate

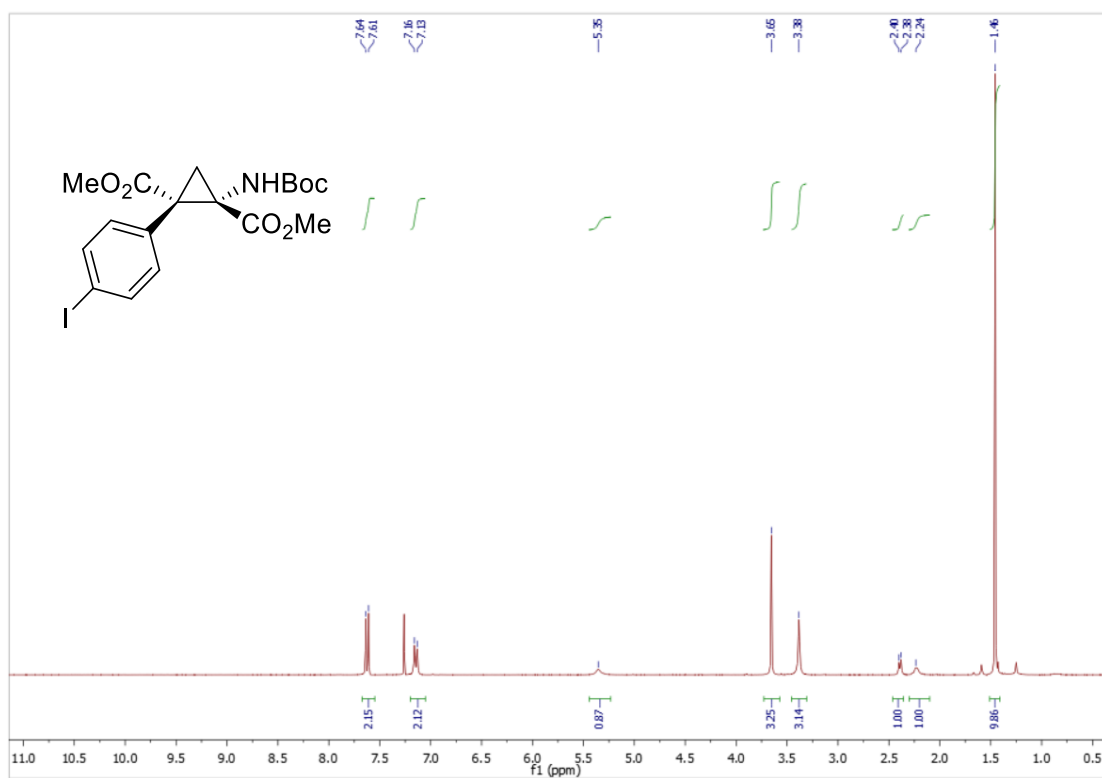

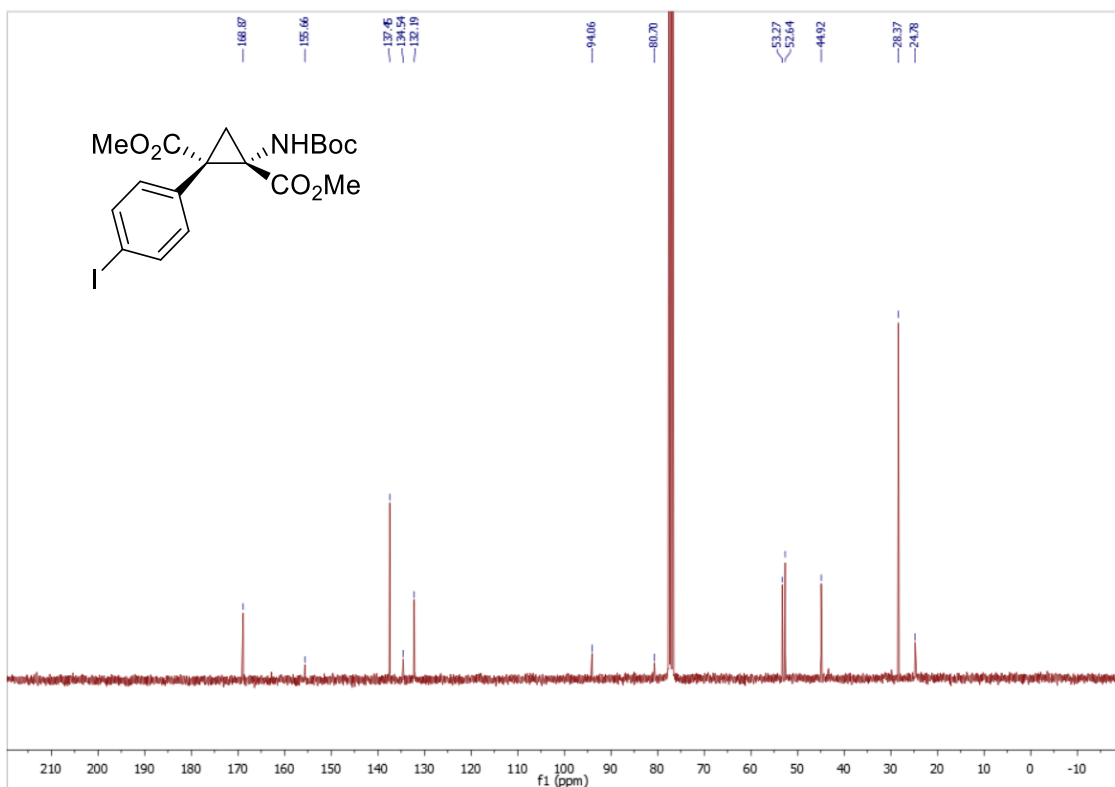

**Compound 38**: ethyl (1*R*,2*S*,5*S*)-5-(bis(tert-butoxycarbonyl)amino)-2-(hydroxy(phenyl)methyl)-4-oxo-3-oxabicyclo[3.1.0]hexane-1-carboxylate

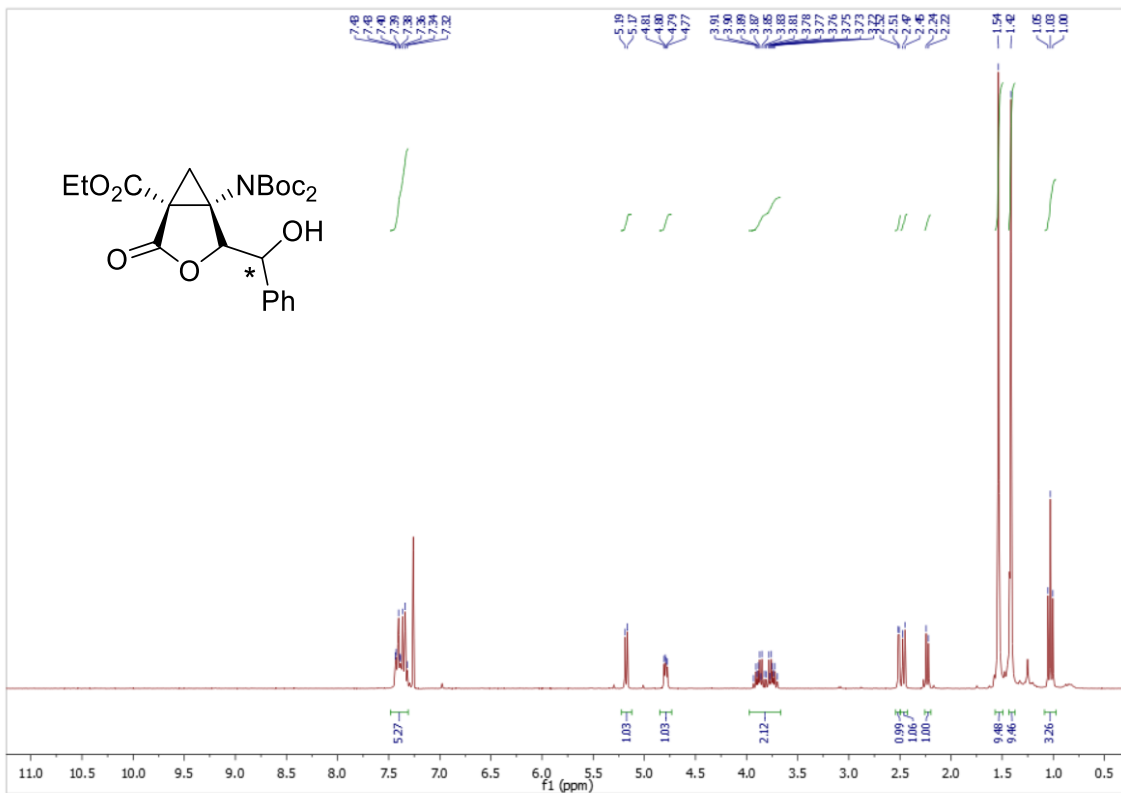

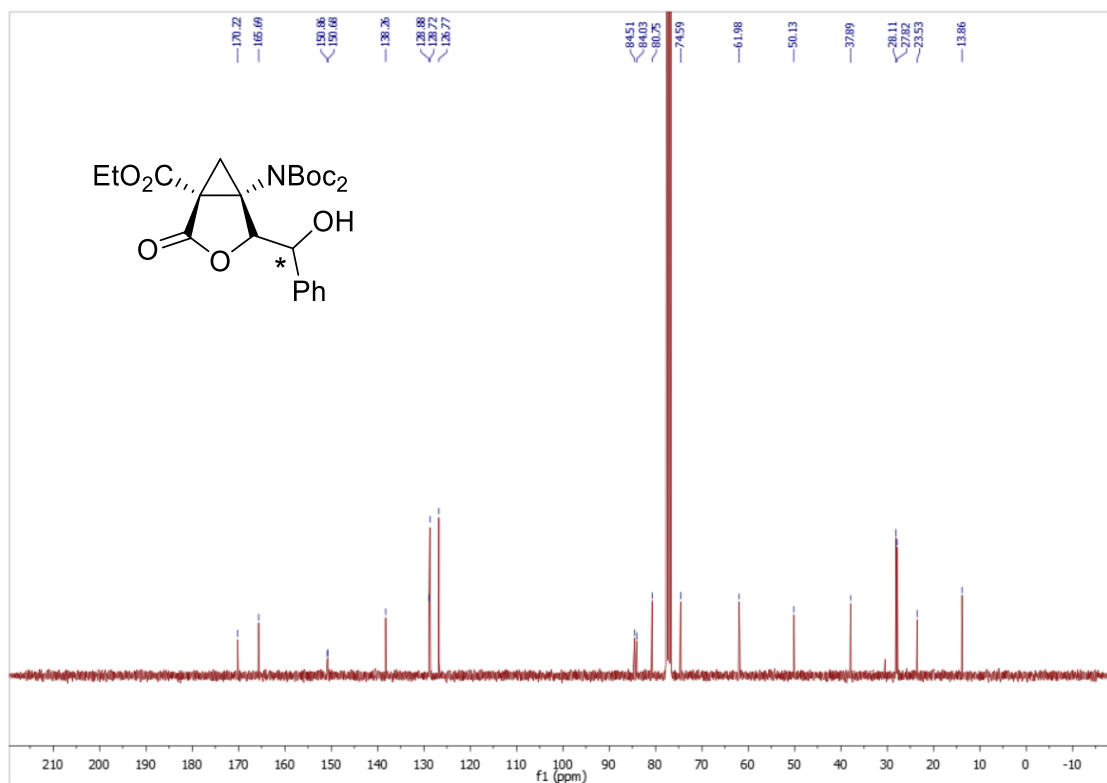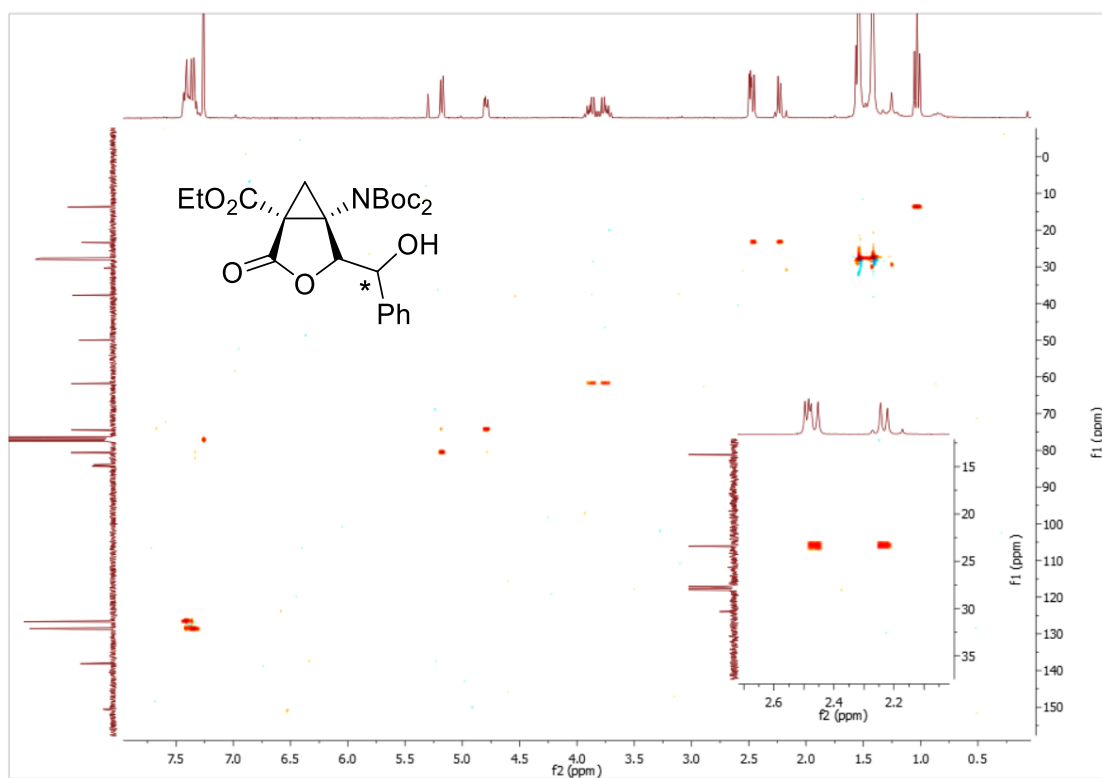



**Compound 39**: 2-ethyl 1-methyl (1*S*,2*R*)-1-(bis(tert-butoxycarbonyl)amino)-2-phenethylcyclopropane-1,2-dicarboxylate

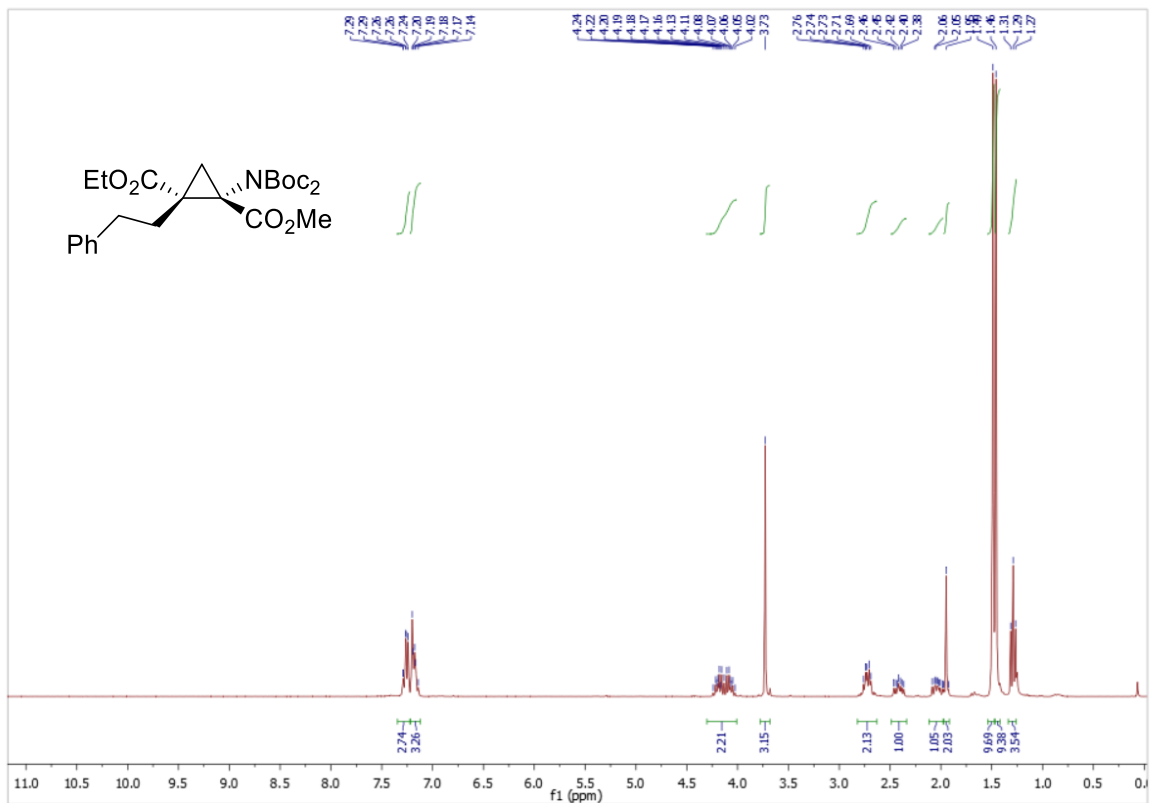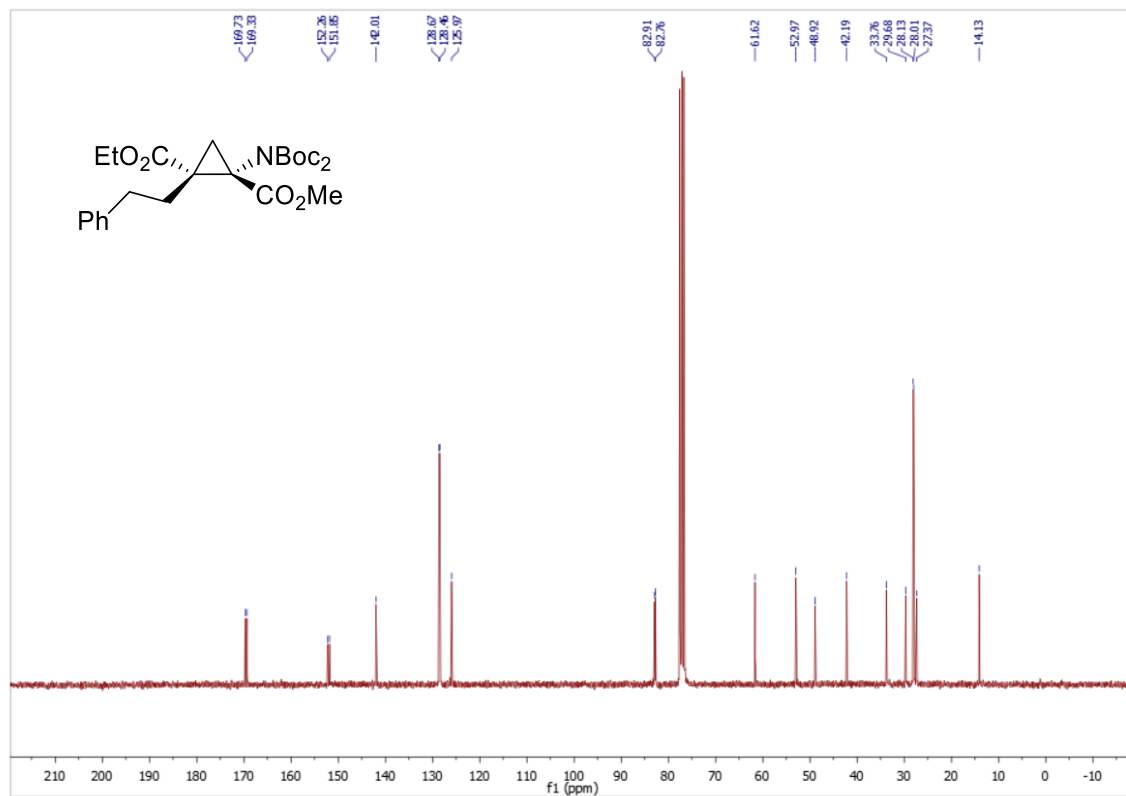

**Compound 40**: 2-ethyl 1-methyl (1*S*,2*S*)-1-(bis(tert-butoxycarbonyl)amino)-2-ethynylcyclopropane-1,2-dicarboxylate

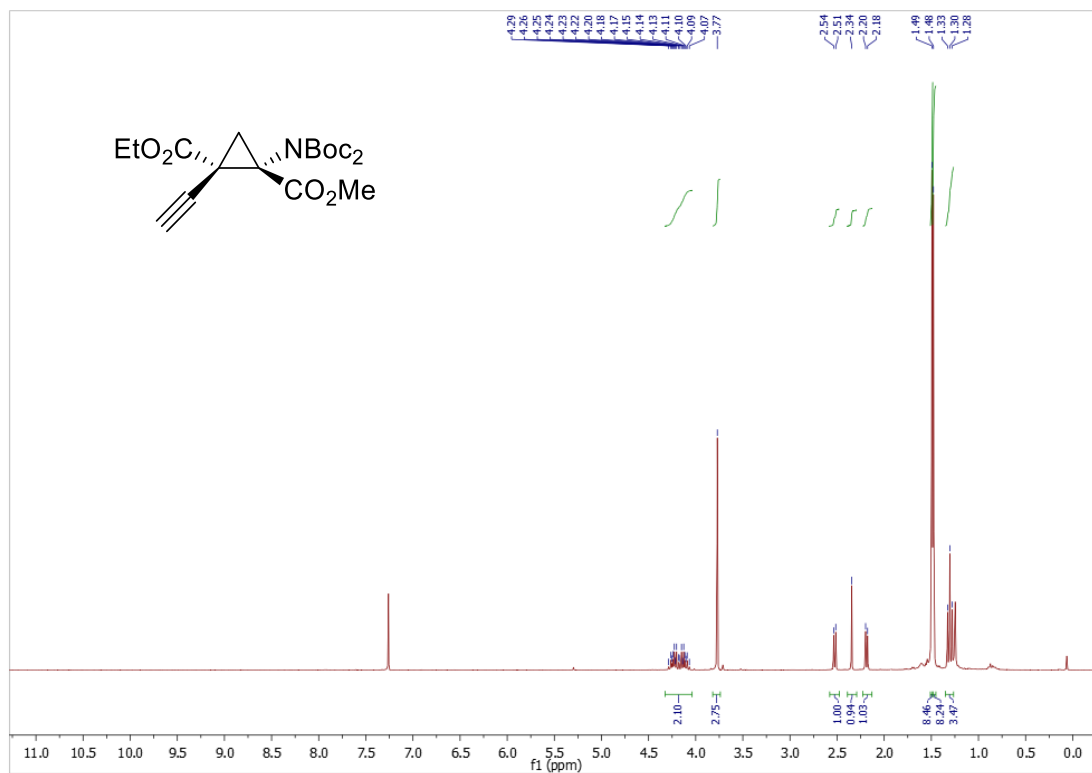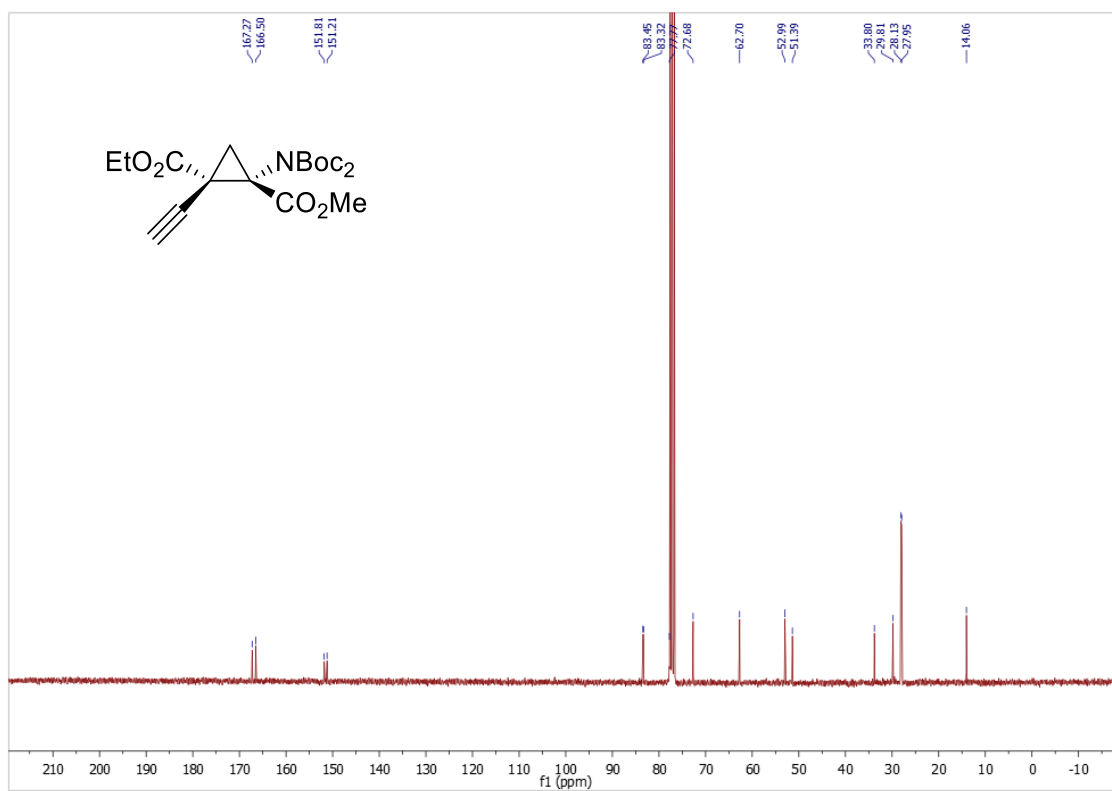

## 7. HPLC chromatograms

### **Compound 1** : 2-(tert-butyl) 1-methyl (1S,2R)-1-(bis(tert-butoxycarbonyl)amino)-2-cyanocyclopropane-1,2-dicarboxylate

|                      |                    |                   |          |
|----------------------|--------------------|-------------------|----------|
| Injection Name:      | HB-78-rac          | Run Time (min):   | 30,00    |
| Vial Number:         | RE1                | Injection Volume: | 10,00    |
| Injection Type:      | Unknown            | Channel:          | UV_VIS_3 |
| Comment:             | IC_Hept:iPrOH9:1   | Wavelength:       | 220      |
| Instrument Method:   | 90A-10C            | Bandwidth:        | 4        |
| Processing Method:   | methode traitement | Dilution Factor:  | 1,0000   |
| Injection Date/Time: | 07/déc./21 09:58   | Sample Weight:    | 1,0000   |

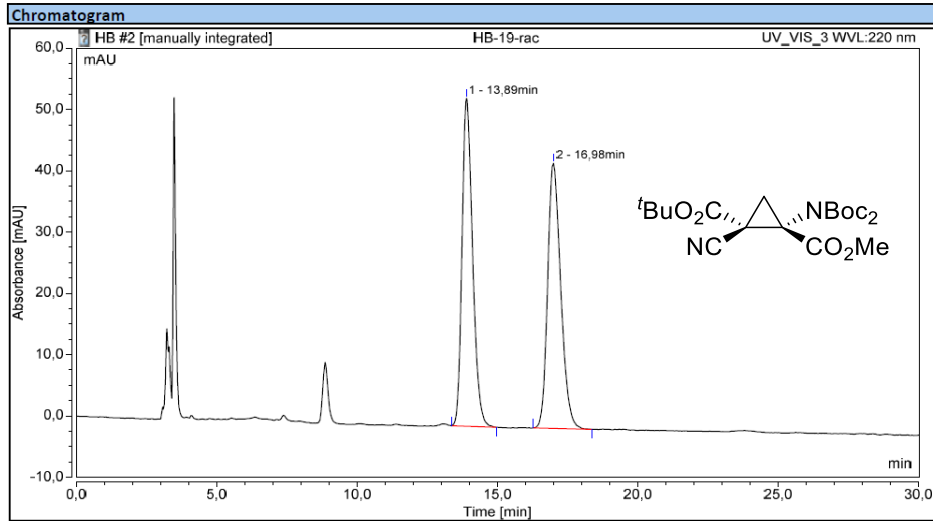

**Injection Details**

|                      |                    |                   |          |
|----------------------|--------------------|-------------------|----------|
| Injection Name:      | HB-78-rac          | Run Time (min):   | 30,00    |
| Vial Number:         | RB8                | Injection Volume: | 10,00    |
| Injection Type:      | Unknown            | Channel:          | UV_VIS_3 |
| Comment:             | IC_Hept:iPrOH9:1   | Wavelength:       | 220      |
| Instrument Method:   | 90A-10C            | Bandwidth:        | 4        |
| Processing Method:   | methode traitement | Dilution Factor:  | 1,0000   |
| Injection Date/Time: | 20/déc./21 15:57   | Sample Weight:    | 1,0000   |

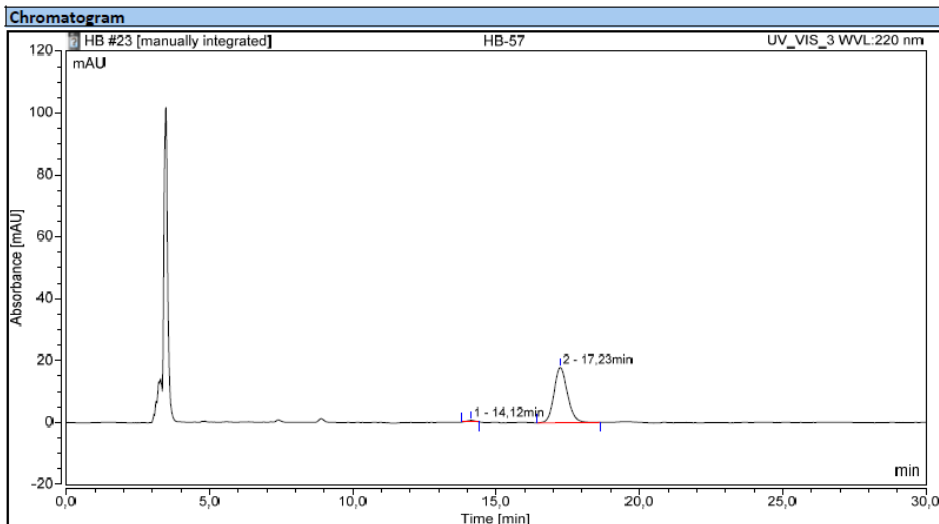

**Compound 2** : methyl (1S,2R)-1-(bis(tert-butoxycarbonyl)amino)-2-cyano-2-(4-methoxybenzoyl)cyclopropane-1-carboxylate

| Injection Details    |                          |                         |
|----------------------|--------------------------|-------------------------|
| Injection Name:      | HB-78-rac                | Run Time (min): 30,00   |
| Vial Number:         | RC6                      | Injection Volume: 10,00 |
| Injection Type:      | Unknown                  | Channel: UV_VIS_3       |
| Comment:             | IC_Hept:iPrOH 70/30 20°C | Wavelength: 220         |
| Instrument Method:   | 70A-30C                  | Bandwidth: 4            |
| Processing Method:   | methode traitement       | Dilution Factor: 1,0000 |
| Injection Date/Time: | 24/mars/22 12:59         | Sample Weight: 1,0000   |

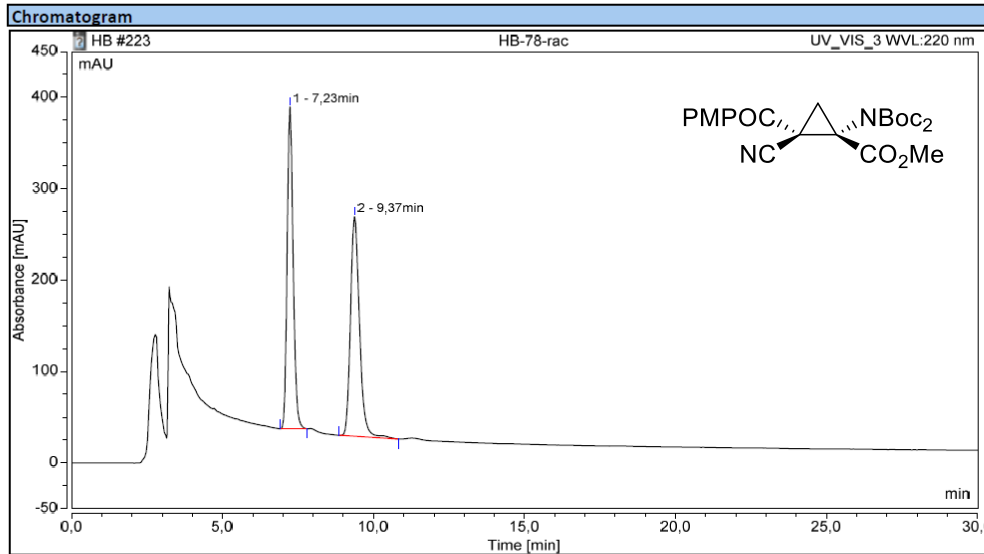

**Integration Results**

| No.           | Peak Name | Retention Time min | Area mAU*min   | Height mAU     | Relative Area % | Relative Height % |
|---------------|-----------|--------------------|----------------|----------------|-----------------|-------------------|
| 1             |           | 7,23               | 80,969         | 352,318        | 49,22           | 59,44             |
| 2             |           | 9,37               | 83,519         | 240,394        | 50,78           | 40,56             |
| <b>Total:</b> |           |                    | <b>164,489</b> | <b>592,712</b> | <b>100,00</b>   | <b>100,00</b>     |

| Injection Details    |                          |                         |
|----------------------|--------------------------|-------------------------|
| Injection Name:      | HB-78-rac                | Run Time (min): 30,00   |
| Vial Number:         | RC7                      | Injection Volume: 10,00 |
| Injection Type:      | Unknown                  | Channel: UV_VIS_3       |
| Comment:             | IC_Hept:iPrOH 70/30 20°C | Wavelength: 220         |
| Instrument Method:   | 70A-30C                  | Bandwidth: 4            |
| Processing Method:   | methode traitement       | Dilution Factor: 1,0000 |
| Injection Date/Time: | 24/mars/22 13:31         | Sample Weight: 1,0000   |

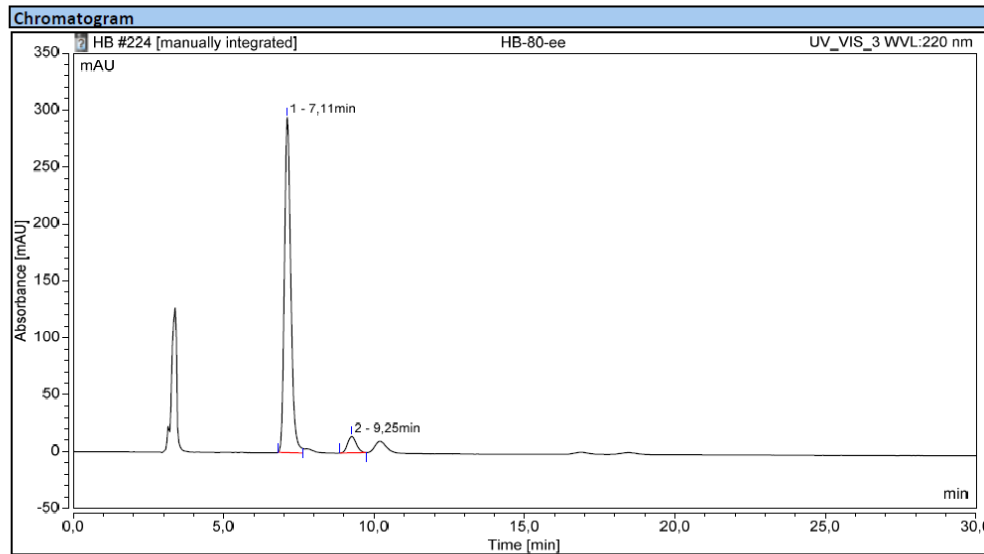

**Integration Results**

| No.           | Peak Name | Retention Time min | Area mAU*min  | Height mAU     | Relative Area % | Relative Height % |
|---------------|-----------|--------------------|---------------|----------------|-----------------|-------------------|
| 1             |           | 7,11               | 71,868        | 294,625        | 93,64           | 95,29             |
| 2             |           | 9,25               | 4,881         | 14,573         | 6,36            | 4,71              |
| <b>Total:</b> |           |                    | <b>76,749</b> | <b>309,198</b> | <b>100,00</b>   | <b>100,00</b>     |

**Compound 3** : methyl (1*S*,2*R*)-1-(bis(tert-butoxycarbonyl)amino)-2-cyano-2-(methoxy(methyl)carbamoyl)cyclopropane-1-carboxylate

| Injection Details    |                    |                         |
|----------------------|--------------------|-------------------------|
| Injection Name:      | HB-78-rac          | Run Time (min): 30,00   |
| Vial Number:         | RB2                | Injection Volume: 10,00 |
| Injection Type:      | Unknown            | Channel: UV_VIS_3       |
| Comment:             | IC_Hept:iPrOH7:3   | Wavelength: 220         |
| Instrument Method:   | 70A-30C            | Bandwidth: 4            |
| Processing Method:   | methode traitement | Dilution Factor: 1,0000 |
| Injection Date/Time: | 17janv./22 14:07   | Sample Weight: 1,0000   |

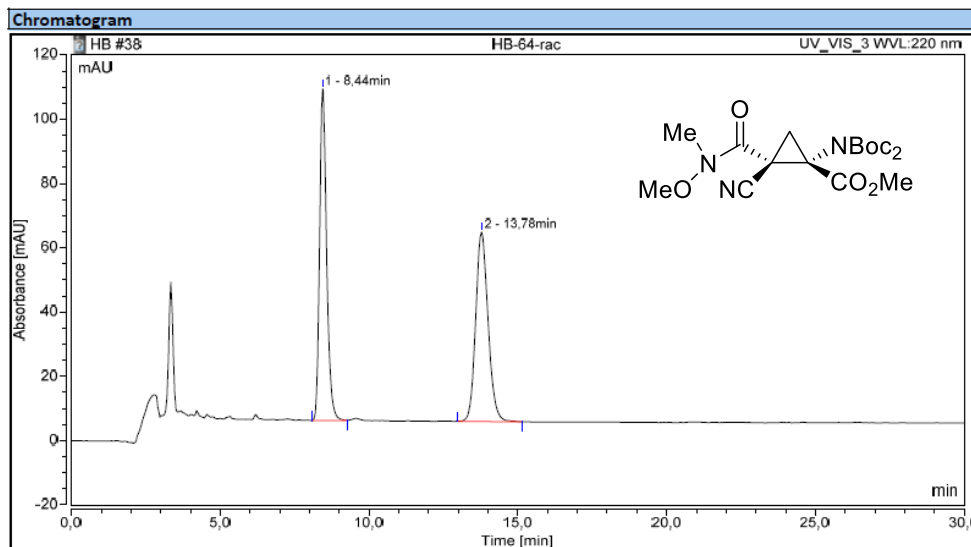

**Integration Results**

| No.           | Peak Name | Retention Time<br>min | Area<br>mAU*min | Height<br>mAU  | Relative Area<br>% | Relative Height<br>% |
|---------------|-----------|-----------------------|-----------------|----------------|--------------------|----------------------|
| 1             |           | 8,44                  | 28,150          | 103,168        | 49,78              | 63,62                |
| 2             |           | 13,78                 | 28,402          | 58,986         | 50,22              | 36,38                |
| <b>Total:</b> |           |                       | <b>56,552</b>   | <b>162,154</b> | <b>100,00</b>      | <b>100,00</b>        |

| Injection Details    |                    |                         |
|----------------------|--------------------|-------------------------|
| Injection Name:      | HB-78-rac          | Run Time (min): 30,00   |
| Vial Number:         | RB7                | Injection Volume: 10,00 |
| Injection Type:      | Unknown            | Channel: UV_VIS_3       |
| Comment:             | IC_Hept:iPrOH7:3   | Wavelength: 220         |
| Instrument Method:   | 70A-30C            | Bandwidth: 4            |
| Processing Method:   | methode traitement | Dilution Factor: 1,0000 |
| Injection Date/Time: | 24/janv./22 12:02  | Sample Weight: 1,0000   |

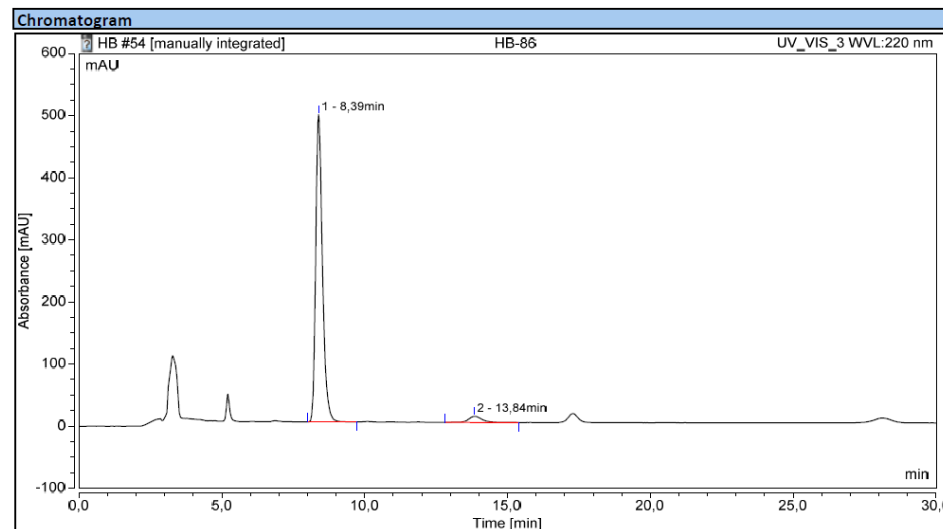

**Integration Results**

| No.           | Peak Name | Retention Time<br>min | Area<br>mAU*min | Height<br>mAU  | Relative Area<br>% | Relative Height<br>% |
|---------------|-----------|-----------------------|-----------------|----------------|--------------------|----------------------|
| 1             |           | 8,39                  | 135,251         | 494,755        | 96,14              | 98,03                |
| 2             |           | 13,84                 | 5,425           | 9,958          | 3,86               | 1,97                 |
| <b>Total:</b> |           |                       | <b>140,675</b>  | <b>504,714</b> | <b>100,00</b>      | <b>100,00</b>        |

**Compound 4** : methyl (1S,2R)-1-(bis(tert-butoxycarbonyl)amino)-2-(2-ethoxy-2-oxoacetyl)cyclopropane-1-carboxylate

| Injection Details    |                     |                         |
|----------------------|---------------------|-------------------------|
| Injection Name:      | HB-78-rac           | Run Time (min): 30,00   |
| Vial Number:         | RD2                 | Injection Volume: 10,00 |
| Injection Type:      | Unknown             | Channel: UV_VIS_3       |
| Comment:             | IB_Hept:iPrOH 5:0.5 | Wavelength: 220         |
| Instrument Method:   | 95A-5C              | Bandwidth: 4            |
| Processing Method:   | methode traitement  | Dilution Factor: 1,0000 |
| Injection Date/Time: | 26/janv./22 12:47   | Sample Weight: 1,0000   |

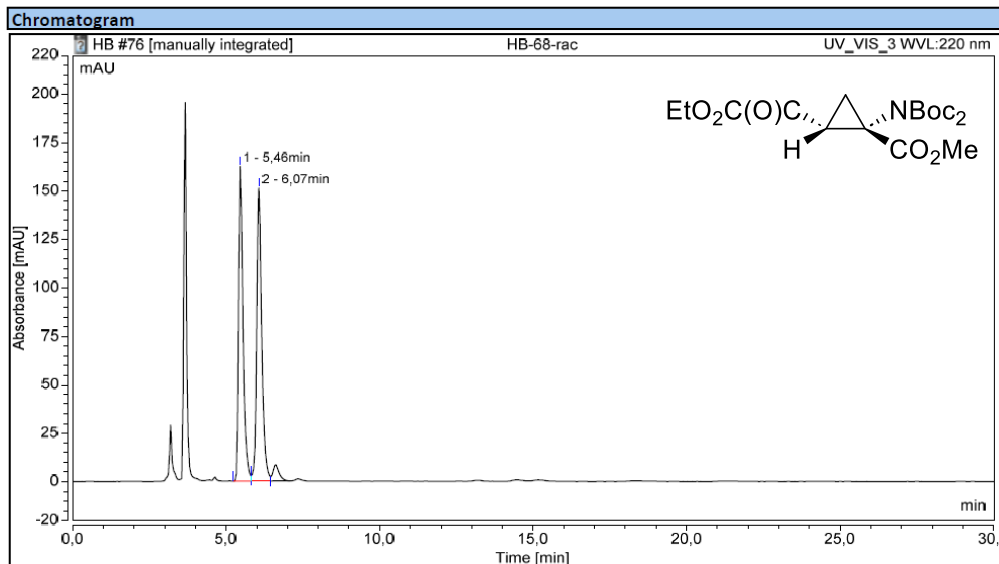

**Integration Results**

| No.           | Peak Name | Retention Time min | Area mAU*min  | Height mAU     | Relative Area % | Relative Height % |
|---------------|-----------|--------------------|---------------|----------------|-----------------|-------------------|
| 1             |           | 5,46               | 27,564        | 162,488        | 49,04           | 51,79             |
| 2             |           | 6,07               | 28,646        | 151,279        | 50,96           | 48,21             |
| <b>Total:</b> |           |                    | <b>56,210</b> | <b>313,767</b> | <b>100,00</b>   | <b>100,00</b>     |

| Injection Details    |                         |                         |
|----------------------|-------------------------|-------------------------|
| Injection Name:      | HB-78-rac               | Run Time (min): 30,00   |
| Vial Number:         | RB4                     | Injection Volume: 10,00 |
| Injection Type:      | Unknown                 | Channel: UV_VIS_3       |
| Comment:             | IB_Hept:iPrOH 95/5 20°C | Wavelength: 220         |
| Instrument Method:   | 95A-5C                  | Bandwidth: 4            |
| Processing Method:   | methode traitement      | Dilution Factor: 1,0000 |
| Injection Date/Time: | 10/mars/22 10:01        | Sample Weight: 1,0000   |

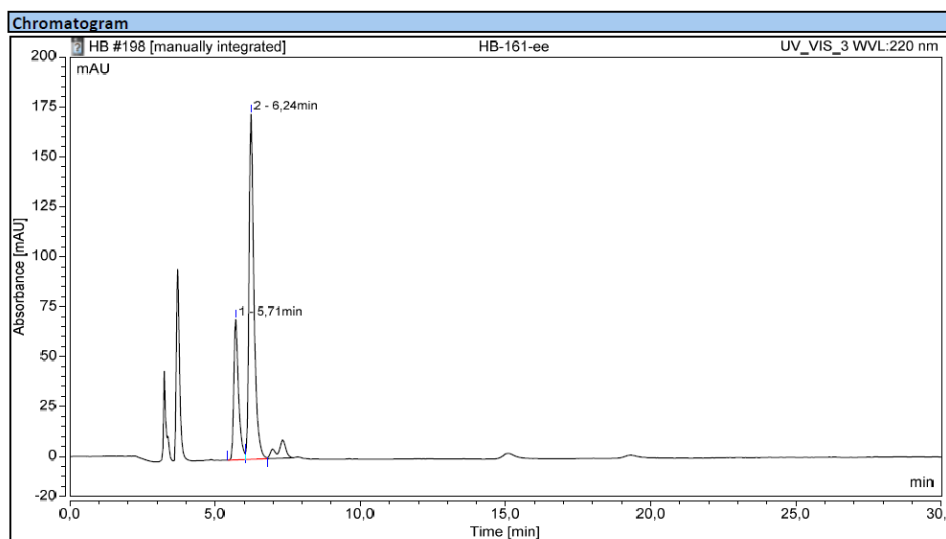

**Integration Results**

| No.           | Peak Name | Retention Time min | Area mAU*min  | Height mAU     | Relative Area % | Relative Height % |
|---------------|-----------|--------------------|---------------|----------------|-----------------|-------------------|
| 1             |           | 5,71               | 13,243        | 70,357         | 27,84           | 28,94             |
| 2             |           | 6,24               | 34,326        | 172,788        | 72,16           | 71,06             |
| <b>Total:</b> |           |                    | <b>47,568</b> | <b>243,145</b> | <b>100,00</b>   | <b>100,00</b>     |

**Compound 5** : dimethyl (1S,2S)-1-(bis(tert-butoxycarbonyl)amino)-2-phenylcyclopropane-1,2-dicarboxylate

| Injection Details    |                         |                         |
|----------------------|-------------------------|-------------------------|
| Injection Name:      | HB-78-rac               | Run Time (min): 30,00   |
| Vial Number:         | GB4                     | Injection Volume: 10,00 |
| Injection Type:      | Unknown                 | Channel: UV_VIS_3       |
| Comment:             | IE_Hept:iPrOH 95/5 20°C | Wavelength: 220         |
| Instrument Method:   | 95A-5C                  | Bandwidth: 4            |
| Processing Method:   | methode traitement      | Dilution Factor: 1,0000 |
| Injection Date/Time: | 04/avr./22 16:18        | Sample Weight: 1,0000   |

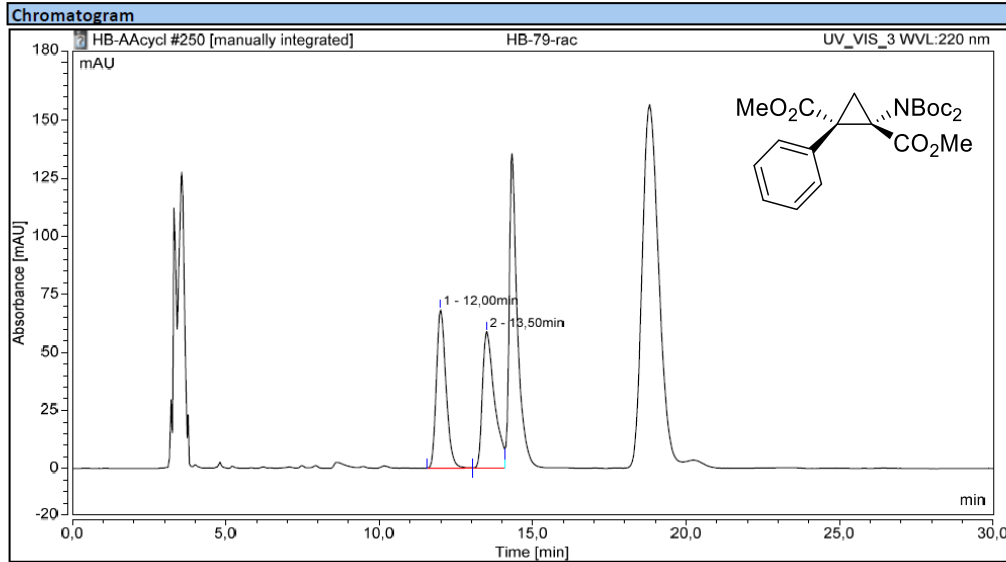

**Integration Results**

| No.           | Peak Name | Retention Time min | Area mAU*min  | Height mAU     | Relative Area % | Relative Height % |
|---------------|-----------|--------------------|---------------|----------------|-----------------|-------------------|
| 1             |           | 12,00              | 24,830        | 68,403         | 48,31           | 53,74             |
| 2             |           | 13,50              | 26,568        | 58,885         | 51,69           | 46,26             |
| <b>Total:</b> |           |                    | <b>51,398</b> | <b>127,288</b> | <b>100,00</b>   | <b>100,00</b>     |

| Injection Details    |                         |                         |
|----------------------|-------------------------|-------------------------|
| Injection Name:      | HB-78-rac               | Run Time (min): 30,00   |
| Vial Number:         | GB3                     | Injection Volume: 10,00 |
| Injection Type:      | Unknown                 | Channel: UV_VIS_3       |
| Comment:             | IE_Hept:iPrOH 95/5 20°C | Wavelength: 220         |
| Instrument Method:   | 95A-5C                  | Bandwidth: 4            |
| Processing Method:   | methode traitement      | Dilution Factor: 1,0000 |
| Injection Date/Time: | 04/avr./22 15:46        | Sample Weight: 1,0000   |

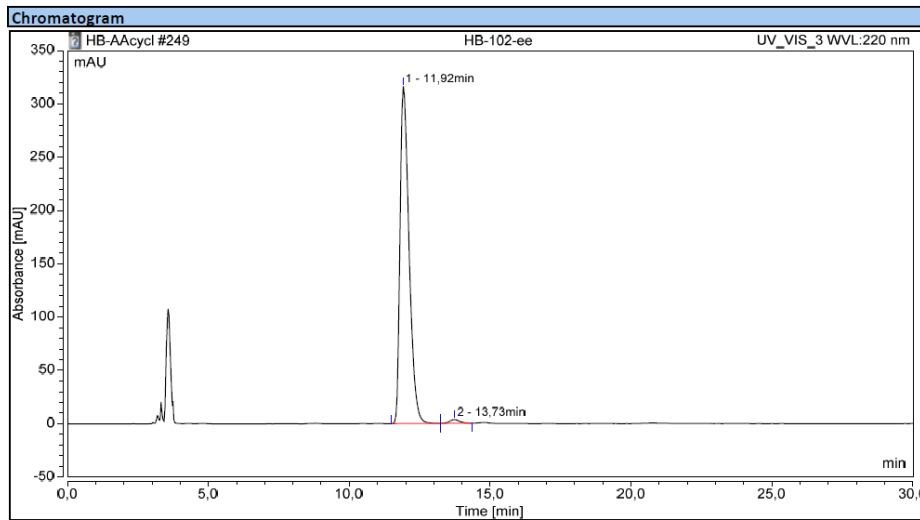

**Integration Results**

| No.           | Peak Name | Retention Time min | Area mAU*min   | Height mAU     | Relative Area % | Relative Height % |
|---------------|-----------|--------------------|----------------|----------------|-----------------|-------------------|
| 1             |           | 11,92              | 116,743        | 316,115        | 98,76           | 98,92             |
| 2             |           | 13,73              | 1,461          | 3,465          | 1,24            | 1,08              |
| <b>Total:</b> |           |                    | <b>118,204</b> | <b>319,580</b> | <b>100,00</b>   | <b>100,00</b>     |

**Compound 6: dimethyl (1S,2S)-1-(bis(tert-butoxycarbonyl)amino)-2-(4-fluorophenyl)cyclopropane-1,2-dicarboxylate**

|                      |                         |                   |          |
|----------------------|-------------------------|-------------------|----------|
| Injection Name:      | HB-78-rac               | Run Time (min):   | 25,00    |
| Vial Number:         | RC3                     | Injection Volume: | 10,00    |
| Injection Type:      | Unknown                 | Channel:          | UV_VIS_3 |
| Comment:             | IE_Hept:iPrOH 95/5 20°C | Wavelength:       | 220      |
| Instrument Method:   | 95A-5C                  | Bandwidth:        | 4        |
| Processing Method:   | methode traitement      | Dilution Factor:  | 1,0000   |
| Injection Date/Time: | 25/mal/22 12:35         | Sample Weight:    | 1,0000   |

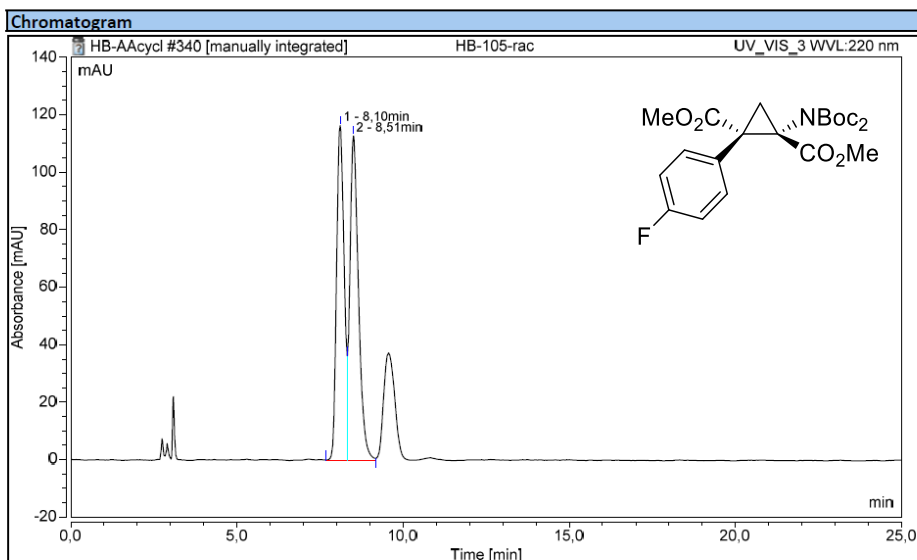

**Integration Results**

| No.           | Peak Name | Retention Time<br>min | Area<br>mAU*min | Height<br>mAU  | Relative Area<br>% | Relative Height<br>% | Resolution (EP) |
|---------------|-----------|-----------------------|-----------------|----------------|--------------------|----------------------|-----------------|
| 1             |           | 8,10                  | 30,537          | 116,436        | 47,45              | 50,79                | 0,89            |
| 2             |           | 8,51                  | 33,814          | 112,827        | 52,55              | 49,21                | n.a.            |
| <b>Total:</b> |           |                       | <b>64,351</b>   | <b>229,263</b> | <b>100,00</b>      | <b>100,00</b>        |                 |

|                      |                         |                   |          |
|----------------------|-------------------------|-------------------|----------|
| Injection Name:      | HB-78-rac               | Run Time (min):   | 25,00    |
| Vial Number:         | RC4                     | Injection Volume: | 10,00    |
| Injection Type:      | Unknown                 | Channel:          | UV_VIS_3 |
| Comment:             | IE_Hept:iPrOH 95/5 20°C | Wavelength:       | 220      |
| Instrument Method:   | 95A-5C                  | Bandwidth:        | 4        |
| Processing Method:   | methode traitement      | Dilution Factor:  | 1,0000   |
| Injection Date/Time: | 25/mal/22 13:02         | Sample Weight:    | 1,0000   |

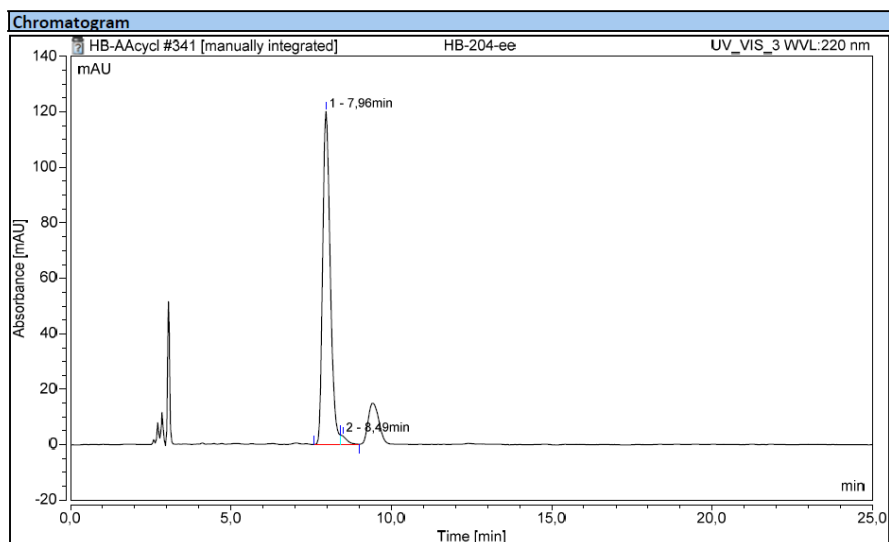

**Integration Results**

| No.           | Peak Name | Retention Time<br>min | Area<br>mAU*min | Height<br>mAU  | Relative Area<br>% | Relative Height<br>% | Resolution (EP) |
|---------------|-----------|-----------------------|-----------------|----------------|--------------------|----------------------|-----------------|
| 1             |           | 7,96                  | 32,829          | 120,075        | 97,75              | 97,49                | n.a.            |
| 2             |           | 8,49                  | 0,757           | 3,087          | 2,25               | 2,51                 | n.a.            |
| <b>Total:</b> |           |                       | <b>33,587</b>   | <b>123,162</b> | <b>100,00</b>      | <b>100,00</b>        |                 |



**Compound 7** : dimethyl (1S,2S)-1-(bis(tert-butoxycarbonyl)amino)-2-(4-chlorophenyl)cyclopropane-1,2-dicarboxylate

| Injection Details    |                         |                         |
|----------------------|-------------------------|-------------------------|
| Injection Name:      | HB-78-rac               | Run Time (min): 30,00   |
| Vial Number:         | GC7                     | Injection Volume: 10,00 |
| Injection Type:      | Unknown                 | Channel: UV_VIS_3       |
| Comment:             | IE_Hept:iPrOH 95/5 20°C | Wavelength: 220         |
| Instrument Method:   | 95A-5C                  | Bandwidth: 4            |
| Processing Method:   | methode traitement      | Dilution Factor: 1,0000 |
| Injection Date/Time: | 10/mars/22 20:03        | Sample Weight: 1,0000   |

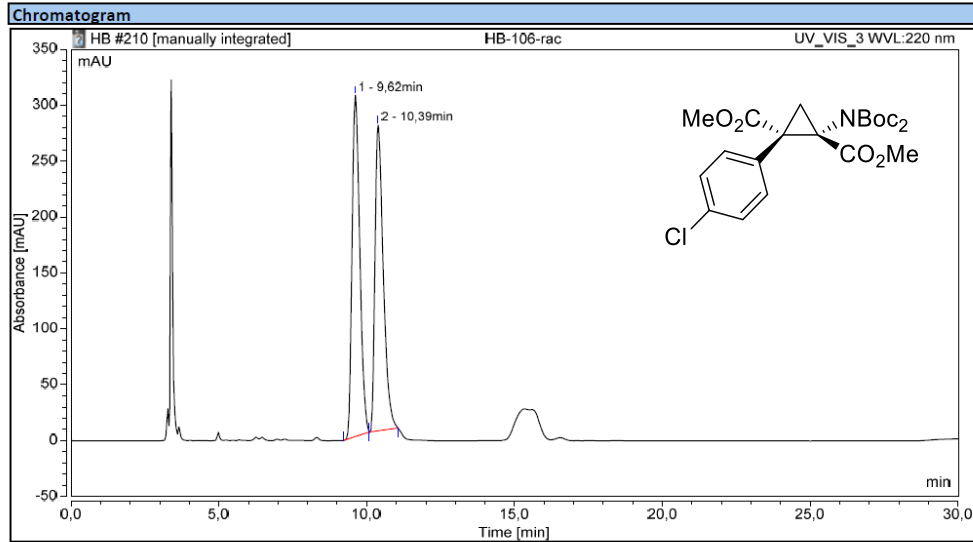

**Integration Results**

| No.           | Peak Name | Retention Time min | Area mAU*min   | Height mAU     | Relative Area % | Relative Height % |
|---------------|-----------|--------------------|----------------|----------------|-----------------|-------------------|
| 1             |           | 9,62               | 91,443         | 305,229        | 50,69           | 52,75             |
| 2             |           | 10,39              | 88,938         | 273,436        | 49,31           | 47,25             |
| <b>Total:</b> |           |                    | <b>180,381</b> | <b>578,664</b> | <b>100,00</b>   | <b>100,00</b>     |

| Injection Details    |                         |                         |
|----------------------|-------------------------|-------------------------|
| Injection Name:      | HB-78-rac               | Run Time (min): 30,00   |
| Vial Number:         | GC6                     | Injection Volume: 10,00 |
| Injection Type:      | Unknown                 | Channel: UV_VIS_3       |
| Comment:             | IE_Hept:iPrOH 95/5 20°C | Wavelength: 220         |
| Instrument Method:   | 95A-5C                  | Bandwidth: 4            |
| Processing Method:   | methode traitement      | Dilution Factor: 1,0000 |
| Injection Date/Time: | 10/mars/22 19:32        | Sample Weight: 1,0000   |

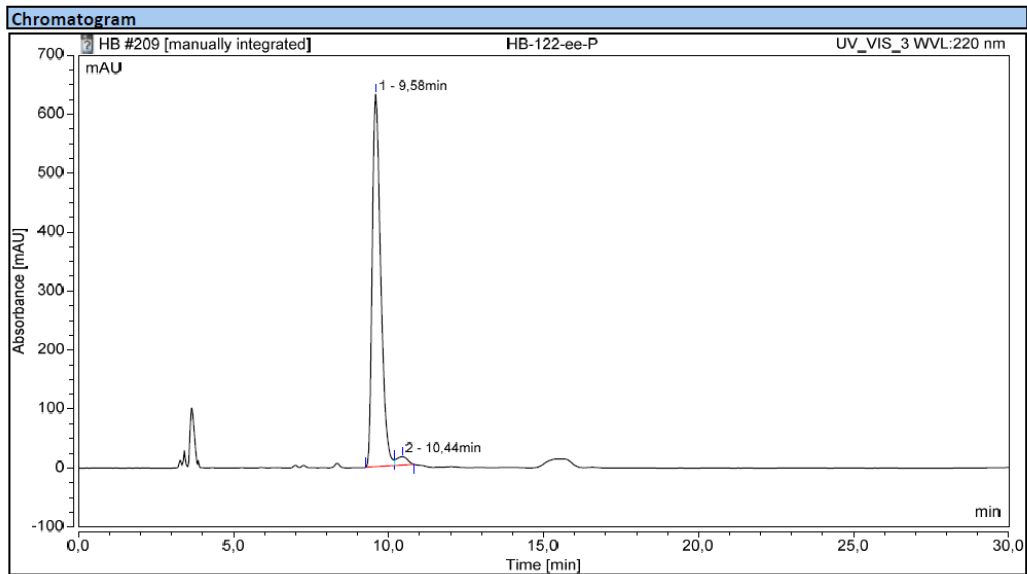

**Integration Results**

| No.           | Peak Name | Retention Time min | Area mAU*min   | Height mAU     | Relative Area % | Relative Height % |
|---------------|-----------|--------------------|----------------|----------------|-----------------|-------------------|
| 1             |           | 9,58               | 199,668        | 631,596        | 97,06           | 97,77             |
| 2             |           | 10,44              | 6,054          | 14,420         | 2,94            | 2,23              |
| <b>Total:</b> |           |                    | <b>205,723</b> | <b>646,016</b> | <b>100,00</b>   | <b>100,00</b>     |

**Compound 8 : 1-ethyl 2-methyl (1S,2S)-1-(4-bromophenyl)-2-(bis(tert-butoxycarbonyl)amino)cyclopropane-1,2-dicarboxylate**

| Injection Details    |                          |                         |
|----------------------|--------------------------|-------------------------|
| Injection Name:      | HB-78-rac                | Run Time (min): 30,00   |
| Vial Number:         | GD2                      | Injection Volume: 10,00 |
| Injection Type:      | Unknown                  | Channel: UV_VIS_3       |
| Comment:             | IE_Hept:iPrOH 90/10 20°C | Wavelength: 220         |
| Instrument Method:   | 90A-10C                  | Bandwidth: 4            |
| Processing Method:   | methode traitement       | Dilution Factor: 1,0000 |
| Injection Date/Time: | 10/mars/22 21:06         | Sample Weight: 1,0000   |

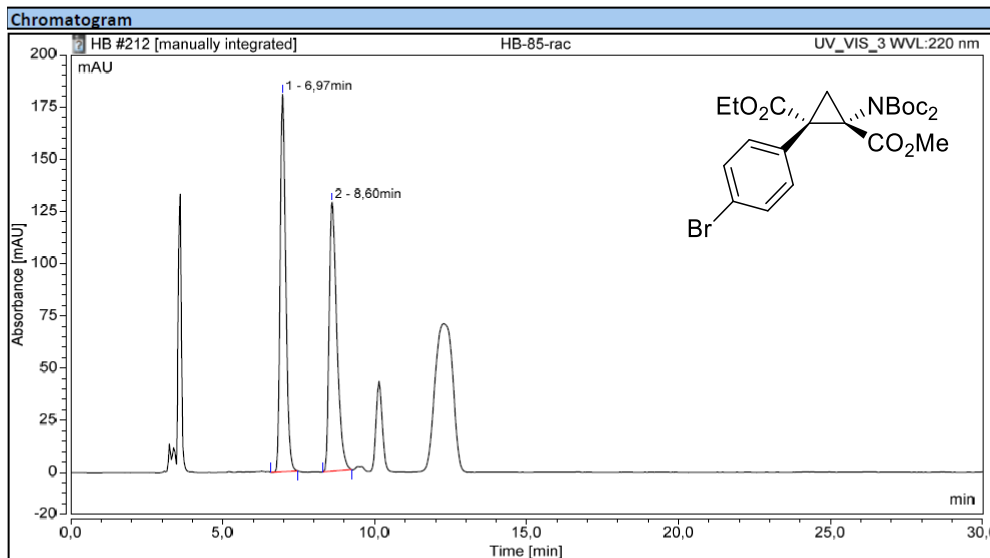

**Integration Results**

| No.           | Peak Name | Retention Time min | Area mAU*min  | Height mAU     | Relative Area % | Relative Height % |
|---------------|-----------|--------------------|---------------|----------------|-----------------|-------------------|
| 1             |           | 6,97               | 38,432        | 180,564        | 50,33           | 58,37             |
| 2             |           | 8,60               | 37,928        | 128,795        | 49,67           | 41,63             |
| <b>Total:</b> |           |                    | <b>76,360</b> | <b>309,359</b> | <b>100,00</b>   | <b>100,00</b>     |

| Injection Details    |                          |                         |
|----------------------|--------------------------|-------------------------|
| Injection Name:      | HB-78-rac                | Run Time (min): 30,00   |
| Vial Number:         | GD1                      | Injection Volume: 10,00 |
| Injection Type:      | Unknown                  | Channel: UV_VIS_3       |
| Comment:             | IE_Hept:iPrOH 90/10 20°C | Wavelength: 220         |
| Instrument Method:   | 90A-10C                  | Bandwidth: 4            |
| Processing Method:   | methode traitement       | Dilution Factor: 1,0000 |
| Injection Date/Time: | 10/mars/22 20:34         | Sample Weight: 1,0000   |

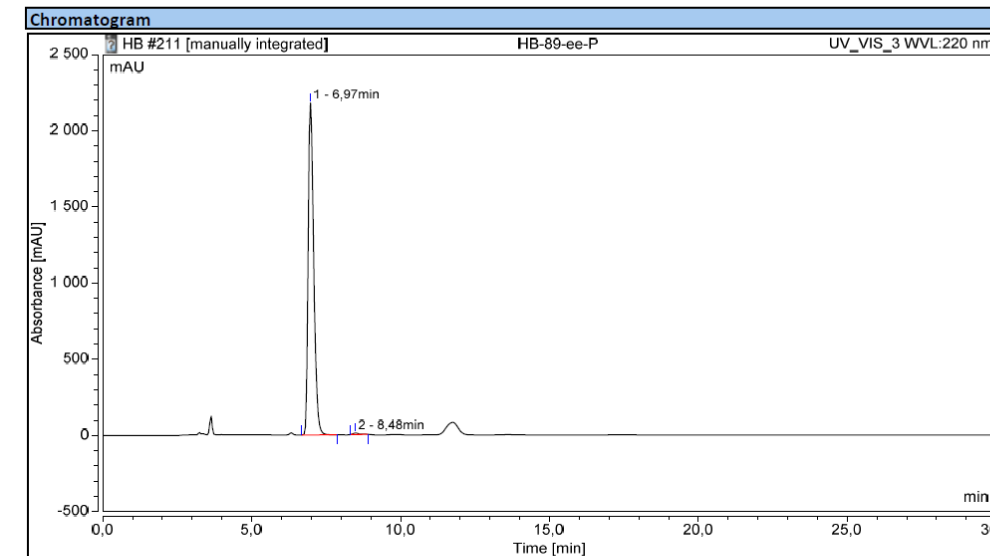

**Integration Results**

| No.           | Peak Name | Retention Time min | Area mAU*min   | Height mAU      | Relative Area % | Relative Height % |
|---------------|-----------|--------------------|----------------|-----------------|-----------------|-------------------|
| 1             |           | 6,97               | 472,997        | 2179,787        | 99,50           | 99,55             |
| 2             |           | 8,48               | 2,393          | 9,899           | 0,50            | 0,45              |
| <b>Total:</b> |           |                    | <b>475,390</b> | <b>2189,686</b> | <b>100,00</b>   | <b>100,00</b>     |

**Compound 9: dimethyl (1S,2S)-1-(bis(tert-butoxycarbonyl)amino)-2-(4-iodophenyl)cyclopropane-1,2-dicarboxylate**

| Injection Details    |                         |                         |
|----------------------|-------------------------|-------------------------|
| Injection Name:      | HB-78-rac               | Run Time (min): 20,00   |
| Vial Number:         | RB5                     | Injection Volume: 10,00 |
| Injection Type:      | Unknown                 | Channel: EXT240NM       |
| Comment:             | IE_Hept:IPrOH 95/5 20°C | Wavelength: n.a.        |
| Instrument Method:   | 95A-5C                  | Bandwidth: n.a.         |
| Processing Method:   | methode traitement      | Dilution Factor: 1,0000 |
| Injection Date/Time: | 28/fevr.122 15:42       | Sample Weight: 1,0000   |

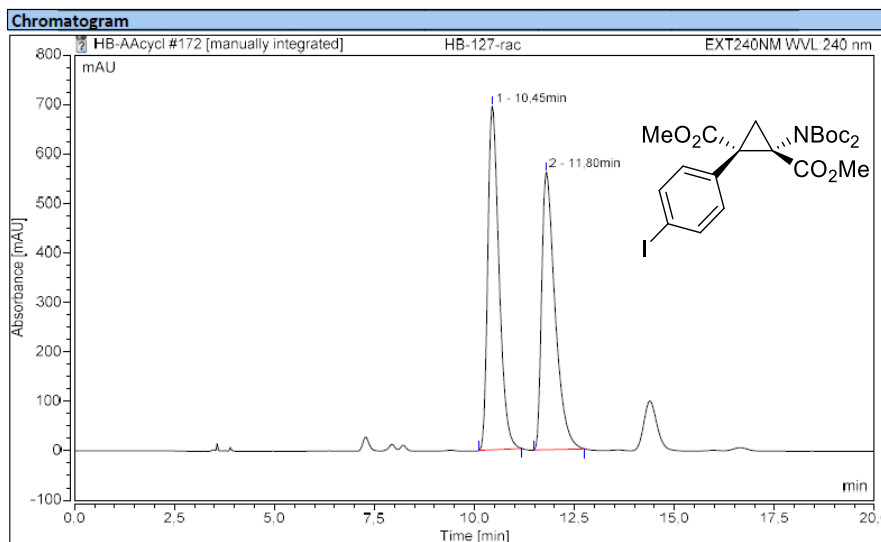

**Integration Results**

| No.           | Peak Name | Retention Time min | Area mAU*min   | Height mAU      | Relative Area % | Relative Height % | Resolution (EP) |
|---------------|-----------|--------------------|----------------|-----------------|-----------------|-------------------|-----------------|
| 1             |           | 10.45              | 226,586        | 694,690         | 50,88           | 55,30             | 2,44            |
| 2             |           | 11.80              | 218,747        | 561,586         | 49,12           | 44,70             | n.a.            |
| <b>Total:</b> |           |                    | <b>445,333</b> | <b>1256,276</b> | <b>100,00</b>   | <b>100,00</b>     |                 |

| Injection Details    |                         |                         |
|----------------------|-------------------------|-------------------------|
| Injection Name:      | HB-78-rac               | Run Time (min): 20,00   |
| Vial Number:         | RC8                     | Injection Volume: 10,00 |
| Injection Type:      | Unknown                 | Channel: UV_VIS_3       |
| Comment:             | IE_Hept:IPrOH 95/5 20°C | Wavelength: 220         |
| Instrument Method:   | 95A-5C                  | Bandwidth: 4            |
| Processing Method:   | methode traitement      | Dilution Factor: 1,0000 |
| Injection Date/Time: | 28/fevr.122 16:03       | Sample Weight: 1,0000   |

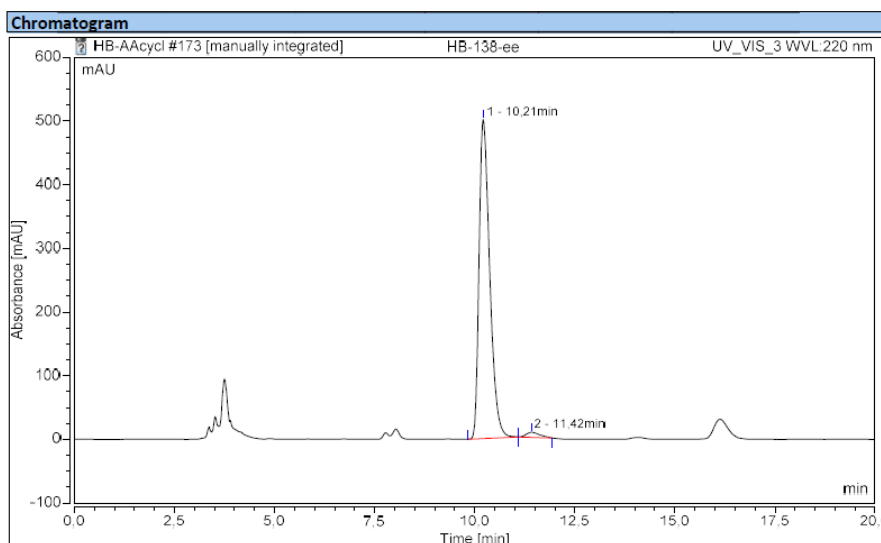

**Integration Results**

| No.           | Peak Name | Retention Time min | Area mAU*min   | Height mAU     | Relative Area % | Relative Height % | Resolution (EP) |
|---------------|-----------|--------------------|----------------|----------------|-----------------|-------------------|-----------------|
| 1             |           | 10.21              | 153,845        | 501,117        | 98,01           | 98,41             | 2,22            |
| 2             |           | 11.42              | 3,130          | 8,099          | 1,99            | 1,59              | n.a.            |
| <b>Total:</b> |           |                    | <b>156,975</b> | <b>509,216</b> | <b>100,00</b>   | <b>100,00</b>     |                 |

**Compound 10**: dimethyl (1S,2S)-1-(bis(tert-butoxycarbonyl)amino)-2-(4-(trifluoromethyl)phenyl)cyclopropane-1,2-dicarboxylate

| Injection Details    |                          |                         |
|----------------------|--------------------------|-------------------------|
| Injection Name:      | HB-78-rac                | Run Time (min): 30,00   |
| Vial Number:         | RC4                      | Injection Volume: 15,00 |
| Injection Type:      | Unknown                  | Channel: UV_VIS_3       |
| Comment:             | IC_Hept:iPrOH 90/10 20°C | Wavelength: 220         |
| Instrument Method:   | 90A-10C                  | Bandwidth: 4            |
| Processing Method:   | methode traitement       | Dilution Factor: 1,0000 |
| Injection Date/Time: | 24/mars/22 11:57         | Sample Weight: 1,0000   |

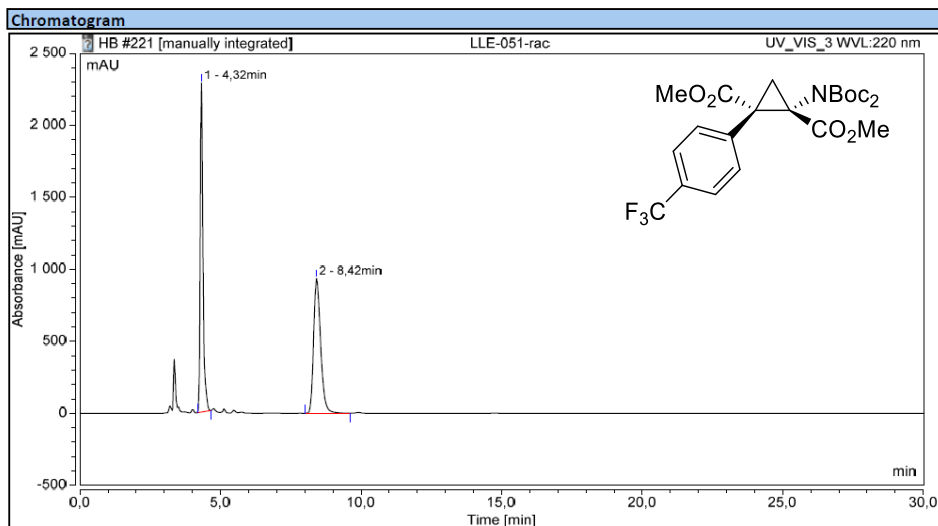

**Integration Results**

| No.    | Peak Name | Retention Time min | Area mAU*min | Height mAU | Relative Area % | Relative Height % |
|--------|-----------|--------------------|--------------|------------|-----------------|-------------------|
| 1      |           | 4,32               | 263,844      | 2285,850   | 49,26           | 70,94             |
| 2      |           | 8,42               | 271,733      | 936,449    | 50,74           | 29,06             |
| Total: |           |                    | 535,576      | 3222,300   | 100,00          | 100,00            |

| Injection Details    |                          |                         |
|----------------------|--------------------------|-------------------------|
| Injection Name:      | HB-78-rac                | Run Time (min): 30,00   |
| Vial Number:         | RC5                      | Injection Volume: 10,00 |
| Injection Type:      | Unknown                  | Channel: UV_VIS_3       |
| Comment:             | IC_Hept:iPrOH 90/10 20°C | Wavelength: 220         |
| Instrument Method:   | 90A-10C                  | Bandwidth: 4            |
| Processing Method:   | methode traitement       | Dilution Factor: 1,0000 |
| Injection Date/Time: | 24/mars/22 12:28         | Sample Weight: 1,0000   |

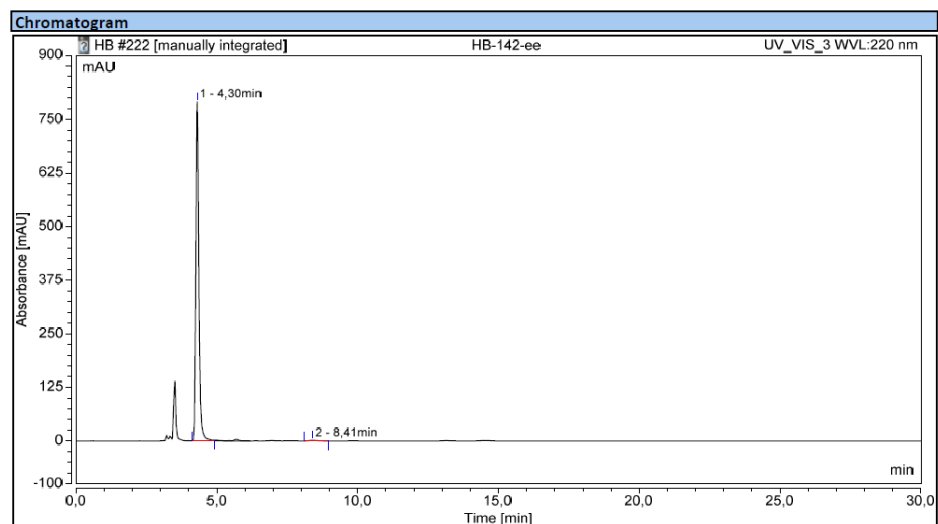

**Integration Results**

| No.    | Peak Name | Retention Time min | Area mAU*min | Height mAU | Relative Area % | Relative Height % |
|--------|-----------|--------------------|--------------|------------|-----------------|-------------------|
| 1      |           | 4,30               | 97,571       | 791,290    | 99,46           | 99,78             |
| 2      |           | 8,41               | 0,526        | 1,773      | 0,54            | 0,22              |
| Total: |           |                    | 98,097       | 793,063    | 100,00          | 100,00            |

**Compound 11 : 2-ethyl 1-methyl (1S,2S)-1-(bis(tert-butoxycarbonyl)amino)-2-(4-nitrophenyl)cyclopropane-1,2-dicarboxylate**

| Injection Details    |                          |                         |
|----------------------|--------------------------|-------------------------|
| Injection Name:      | HB-78-rac                | Run Time (min): 30,00   |
| Vial Number:         | RA4                      | Injection Volume: 10,00 |
| Injection Type:      | Unknown                  | Channel: UV_VIS_3       |
| Comment:             | IE_Hept:iPrOH 80/20 20°C | Wavelength: 220         |
| Instrument Method:   | 80A-20C                  | Bandwidth: 4            |
| Processing Method:   | methode traitement       | Dilution Factor: 1,0000 |
| Injection Date/Time: | 29/mars/22 10:12         | Sample Weight: 1,0000   |

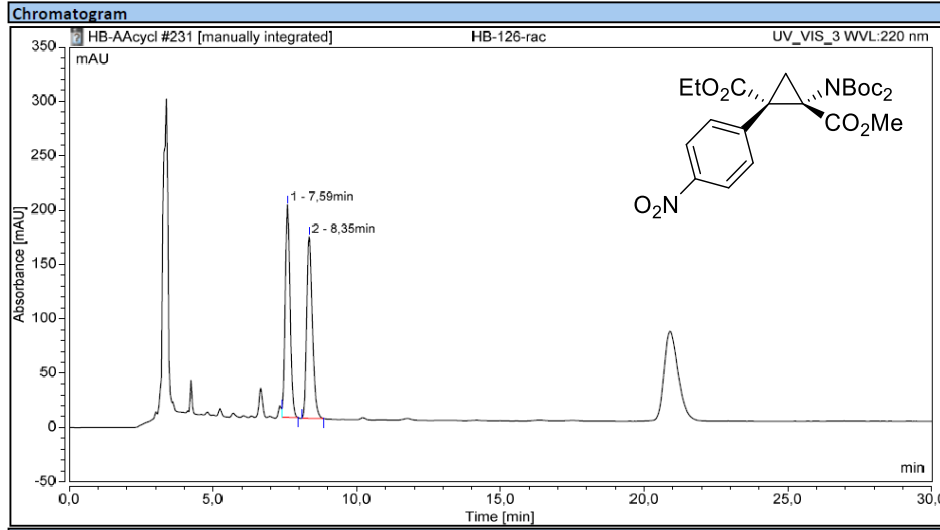

**Integration Results**

| No.           | Peak Name | Retention Time min | Area mAU*min  | Height mAU     | Relative Area % | Relative Height % |
|---------------|-----------|--------------------|---------------|----------------|-----------------|-------------------|
| 1             |           | 7.59               | 38,176        | 195,761        | 50,03           | 53,95             |
| 2             |           | 8.35               | 38,135        | 167,120        | 49,97           | 46,05             |
| <b>Total:</b> |           |                    | <b>76,312</b> | <b>362,881</b> | <b>100,00</b>   | <b>100,00</b>     |

| Injection Details    |                          |                         |
|----------------------|--------------------------|-------------------------|
| Injection Name:      | HB-78-rac                | Run Time (min): 30,00   |
| Vial Number:         | RA5                      | Injection Volume: 10,00 |
| Injection Type:      | Unknown                  | Channel: UV_VIS_3       |
| Comment:             | IE_Hept:iPrOH 80/20 20°C | Wavelength: 220         |
| Instrument Method:   | 80A-20C                  | Bandwidth: 4            |
| Processing Method:   | methode traitement       | Dilution Factor: 1,0000 |
| Injection Date/Time: | 29/mars/22 10:43         | Sample Weight: 1,0000   |

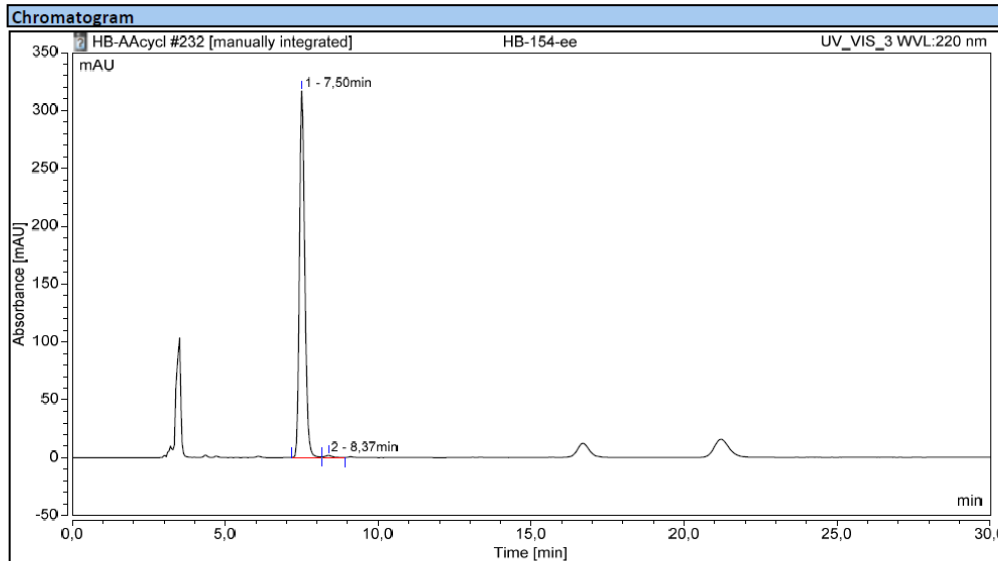

**Integration Results**

| No.           | Peak Name | Retention Time min | Area mAU*min  | Height mAU     | Relative Area % | Relative Height % |
|---------------|-----------|--------------------|---------------|----------------|-----------------|-------------------|
| 1             |           | 7,50               | 64,165        | 316,760        | 99,32           | 99,46             |
| 2             |           | 8,37               | 0,442         | 1,736          | 0,68            | 0,54              |
| <b>Total:</b> |           |                    | <b>64,607</b> | <b>318,495</b> | <b>100,00</b>   | <b>100,00</b>     |

**Compound 12: dimethyl (1S,2S)-1-(bis(tert-butoxycarbonyl)amino)-2-(4-(trifluoromethoxy)phenyl)cyclopropane-1,2-dicarboxylate**

| Injection Details    |                          |                         |
|----------------------|--------------------------|-------------------------|
| Injection Name:      | HB-78-rac                | Run Time (min): 30,00   |
| Vial Number:         | RA6                      | Injection Volume: 10,00 |
| Injection Type:      | Unknown                  | Channel: UV_VIS_3       |
| Comment:             | IC_Hept:iPrOH 90/10 20°C | Wavelength: 220         |
| Instrument Method:   | 90A-10C                  | Bandwidth: 4            |
| Processing Method:   | methode traitement       | Dilution Factor: 1,0000 |
| Injection Date/Time: | 29/mars/22 11:59         | Sample Weight: 1,0000   |

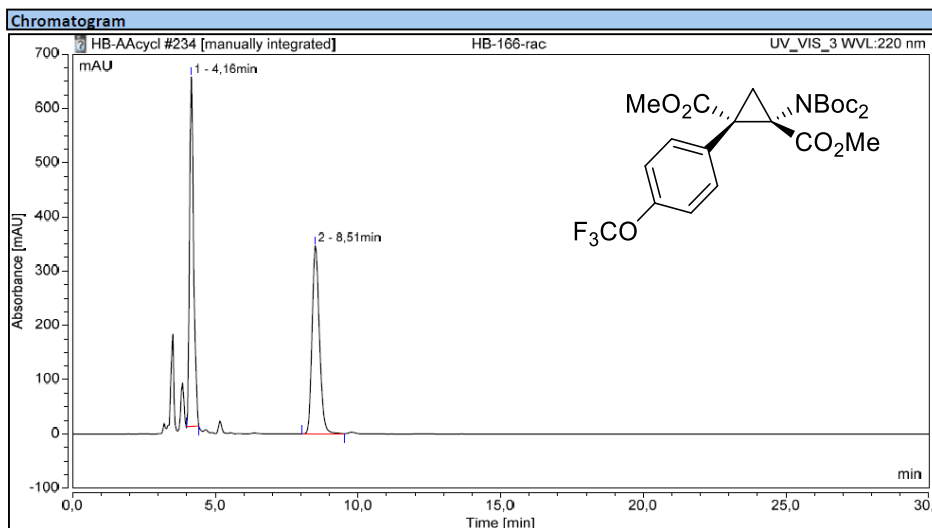

**Integration Results**

| No.           | Peak Name | Retention Time min | Area mAU*min   | Height mAU     | Relative Area % | Relative Height % |
|---------------|-----------|--------------------|----------------|----------------|-----------------|-------------------|
| 1             |           | 4,16               | 107,189        | 644,293        | 50,85           | 64,99             |
| 2             |           | 8,51               | 103,624        | 347,091        | 49,15           | 35,01             |
| <b>Total:</b> |           |                    | <b>210,813</b> | <b>991,384</b> | <b>100,00</b>   | <b>100,00</b>     |

| Injection Details    |                          |                         |
|----------------------|--------------------------|-------------------------|
| Injection Name:      | HB-78-rac                | Run Time (min): 30,00   |
| Vial Number:         | RA7                      | Injection Volume: 10,00 |
| Injection Type:      | Unknown                  | Channel: UV_VIS_3       |
| Comment:             | IC_Hept:iPrOH 90/10 20°C | Wavelength: 220         |
| Instrument Method:   | 90A-10C                  | Bandwidth: 4            |
| Processing Method:   | methode traitement       | Dilution Factor: 1,0000 |
| Injection Date/Time: | 29/mars/22 12:30         | Sample Weight: 1,0000   |

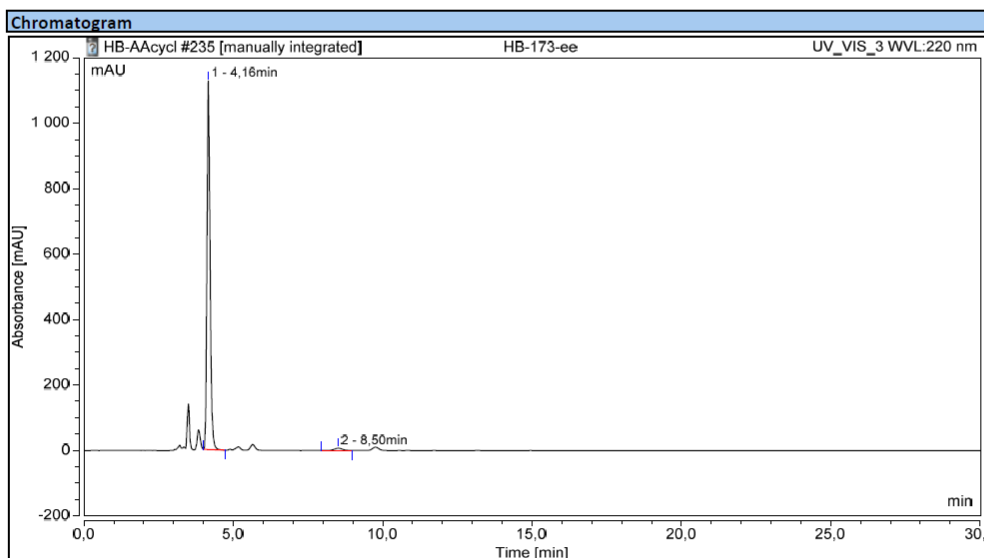

**Integration Results**

| No.           | Peak Name | Retention Time min | Area mAU*min   | Height mAU      | Relative Area % | Relative Height % |
|---------------|-----------|--------------------|----------------|-----------------|-----------------|-------------------|
| 1             |           | 4,16               | 136,765        | 1126,583        | 98,51           | 99,41             |
| 2             |           | 8,50               | 2,063          | 6,728           | 1,49            | 0,59              |
| <b>Total:</b> |           |                    | <b>138,828</b> | <b>1133,311</b> | <b>100,00</b>   | <b>100,00</b>     |

**Compound 13**: dimethyl (1S,2S)-1-(bis(tert-butoxycarbonyl)amino)-2-(3-(trifluoromethyl)phenyl)cyclopropane-1,2-dicarboxylate

| Injection Details    |                         |                         |
|----------------------|-------------------------|-------------------------|
| Injection Name:      | HB-78-rac               | Run Time (min): 30,00   |
| Vial Number:         | GC2                     | Injection Volume: 10,00 |
| Injection Type:      | Unknown                 | Channel: UV_VIS_3       |
| Comment:             | IE_Hept:iPrOH 95/5 20°C | Wavelength: 220         |
| Instrument Method:   | 95A-5C                  | Bandwidth: 4            |
| Processing Method:   | methode traitement      | Dilution Factor: 1,0000 |
| Injection Date/Time: | 10/mars/22 17:26        | Sample Weight: 1,0000   |

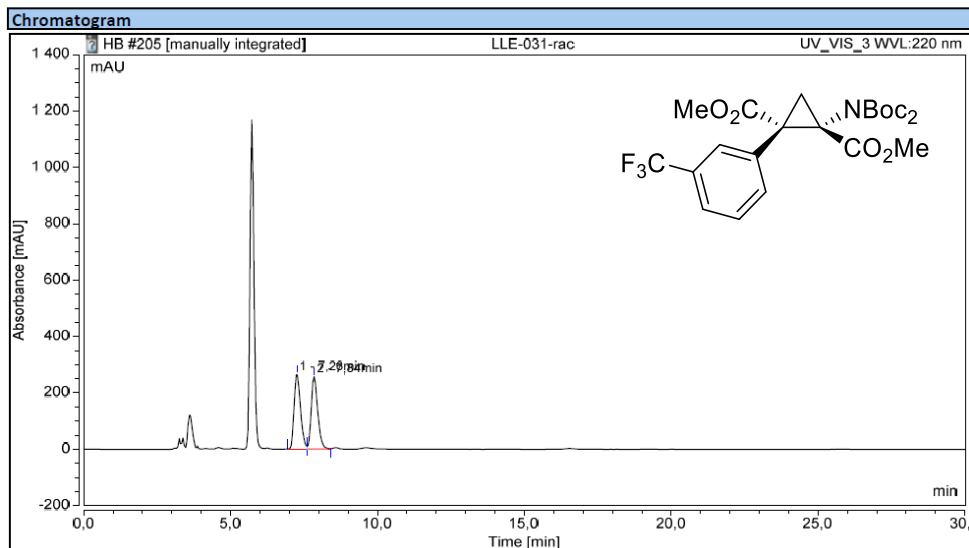

**Integration Results**

| No.           | Peak Name | Retention Time min | Area mAU*min   | Height mAU     | Relative Area % | Relative Height % |
|---------------|-----------|--------------------|----------------|----------------|-----------------|-------------------|
| 1             |           | 7,26               | 66,436         | 264,437        | 50,21           | 50,69             |
| 2             |           | 7,84               | 65,872         | 257,239        | 49,79           | 49,31             |
| <b>Total:</b> |           |                    | <b>132,308</b> | <b>521,676</b> | <b>100,00</b>   | <b>100,00</b>     |

| Injection Details    |                         |                         |
|----------------------|-------------------------|-------------------------|
| Injection Name:      | HB-78-rac               | Run Time (min): 30,00   |
| Vial Number:         | GC3                     | Injection Volume: 10,00 |
| Injection Type:      | Unknown                 | Channel: UV_VIS_3       |
| Comment:             | IE_Hept:iPrOH 95/5 20°C | Wavelength: 220         |
| Instrument Method:   | 95A-5C                  | Bandwidth: 4            |
| Processing Method:   | methode traitement      | Dilution Factor: 1,0000 |
| Injection Date/Time: | 10/mars/22 17:57        | Sample Weight: 1,0000   |

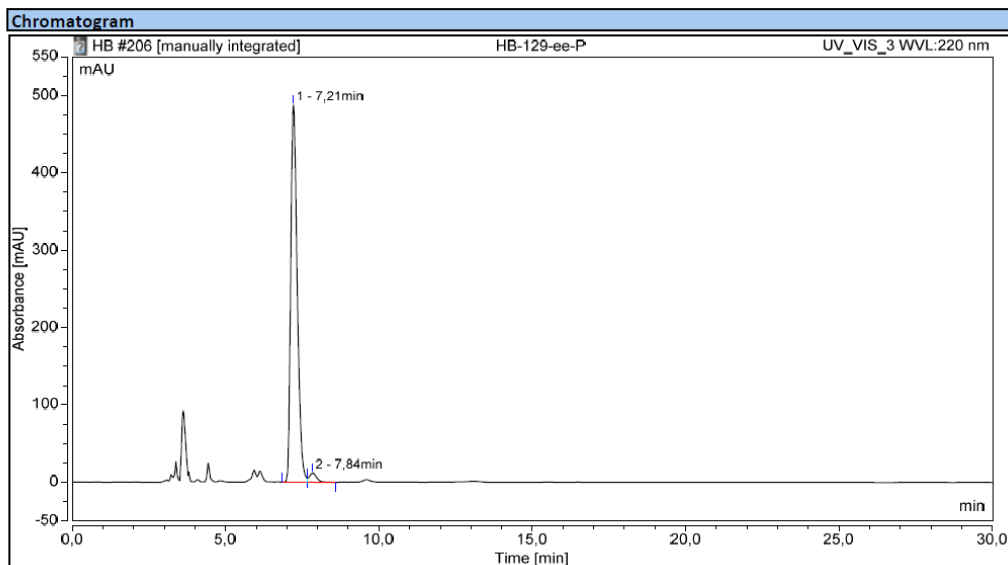

**Integration Results**

| No.           | Peak Name | Retention Time min | Area mAU*min   | Height mAU     | Relative Area % | Relative Height % |
|---------------|-----------|--------------------|----------------|----------------|-----------------|-------------------|
| 1             |           | 7,21               | 119,870        | 487,972        | 97,30           | 97,56             |
| 2             |           | 7,84               | 3,320          | 12,196         | 2,70            | 2,44              |
| <b>Total:</b> |           |                    | <b>123,190</b> | <b>500,168</b> | <b>100,00</b>   | <b>100,00</b>     |

**Compound 14**: dimethyl (1S,2S)-1-(bis(tert-butoxycarbonyl)amino)-2-(3,4-dichlorophenyl)cyclopropane-1,2-dicarboxylate

| Injection Details    |                         |                         |
|----------------------|-------------------------|-------------------------|
| Injection Name:      | HB-78-rac               | Run Time (min): 30,00   |
| Vial Number:         | GC5                     | Injection Volume: 10,00 |
| Injection Type:      | Unknown                 | Channel: UV_VIS_3       |
| Comment:             | IE_Hept:iPrOH 95/5 20°C | Wavelength: 220         |
| Instrument Method:   | 95A-5C                  | Bandwidth: 4            |
| Processing Method:   | methode traitement      | Dilution Factor: 1,0000 |
| Injection Date/Time: | 10/mars/22 19:00        | Sample Weight: 1,0000   |

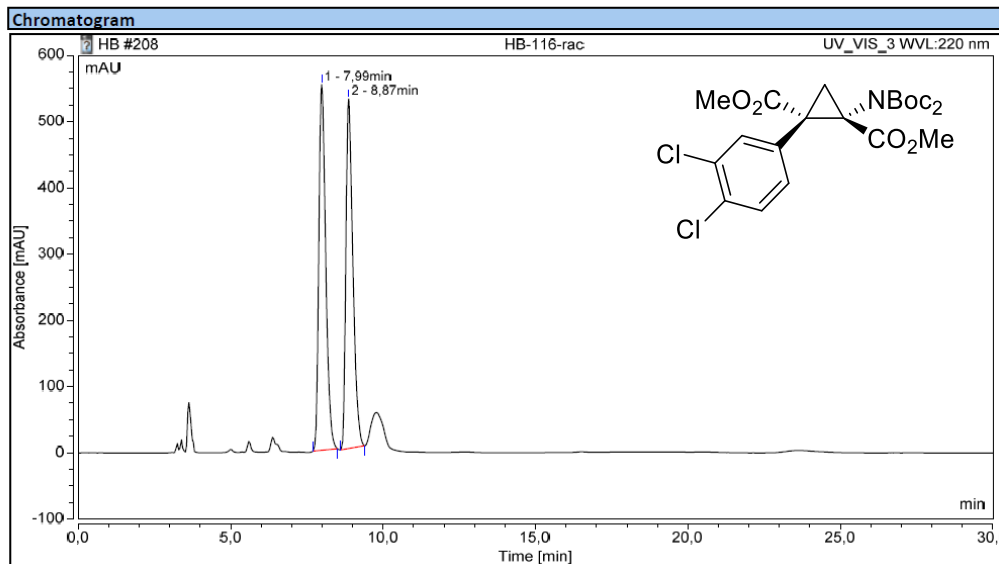

**Integration Results**

| No.           | Peak Name | Retention Time min | Area mAU*min   | Height mAU      | Relative Area % | Relative Height % |
|---------------|-----------|--------------------|----------------|-----------------|-----------------|-------------------|
| 1             |           | 7,99               | 143,794        | 552,107         | 50,61           | 51,13             |
| 2             |           | 8,87               | 140,300        | 527,601         | 49,39           | 48,87             |
| <b>Total:</b> |           |                    | <b>284,094</b> | <b>1079,708</b> | <b>100,00</b>   | <b>100,00</b>     |

| Injection Details    |                         |                         |
|----------------------|-------------------------|-------------------------|
| Injection Name:      | HB-78-rac               | Run Time (min): 30,00   |
| Vial Number:         | GC4                     | Injection Volume: 10,00 |
| Injection Type:      | Unknown                 | Channel: UV_VIS_3       |
| Comment:             | IE_Hept:iPrOH 95/5 20°C | Wavelength: 220         |
| Instrument Method:   | 95A-5C                  | Bandwidth: 4            |
| Processing Method:   | methode traitement      | Dilution Factor: 1,0000 |
| Injection Date/Time: | 10/mars/22 18:29        | Sample Weight: 1,0000   |

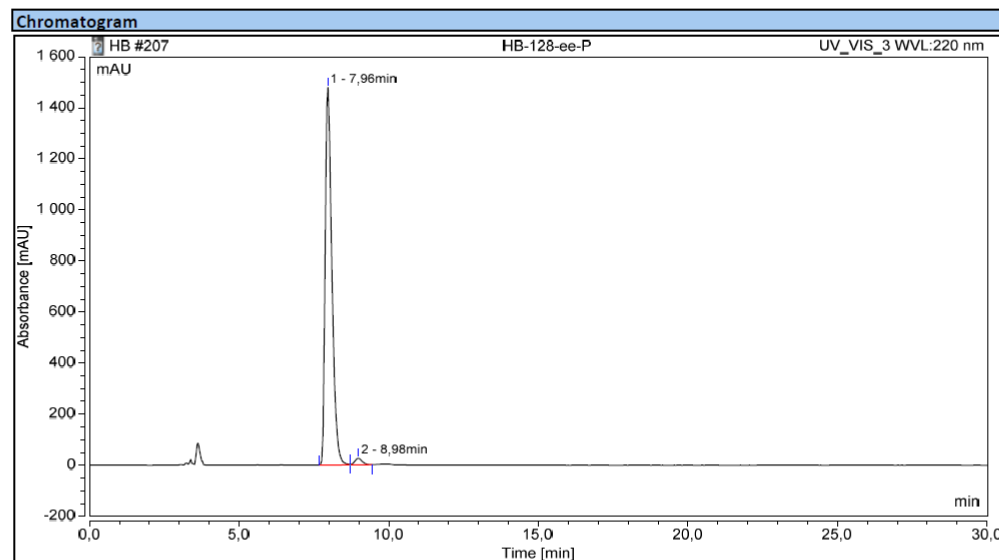

**Integration Results**

| No.           | Peak Name | Retention Time min | Area mAU*min   | Height mAU      | Relative Area % | Relative Height % |
|---------------|-----------|--------------------|----------------|-----------------|-----------------|-------------------|
| 1             |           | 7,96               | 385,356        | 1478,988        | 98,10           | 98,26             |
| 2             |           | 8,98               | 7,477          | 26,140          | 1,90            | 1,74              |
| <b>Total:</b> |           |                    | <b>392,833</b> | <b>1505,128</b> | <b>100,00</b>   | <b>100,00</b>     |



**Compound 15: 2-ethyl 1-methyl (1S,2S)-1-(bis(tert-butoxycarbonyl)amino)-2-((trimethylsilyl)ethynyl)cyclopropane-1,2-dicarboxylate**

| Injection Details    |                          |                         |
|----------------------|--------------------------|-------------------------|
| Injection Name:      | HB-78-rac                | Run Time (min): 30,00   |
| Vial Number:         | RA1                      | Injection Volume: 10,00 |
| Injection Type:      | Unknown                  | Channel: UV_VIS_3       |
| Comment:             | IE_Hept:iPrOH 90/10 20°C | Wavelength: 220         |
| Instrument Method:   | 90A-10C                  | Bandwidth: 4            |
| Processing Method:   | methode traitement       | Dilution Factor: 1,0000 |
| Injection Date/Time: | 29/mars/22 08:38         | Sample Weight: 1,0000   |

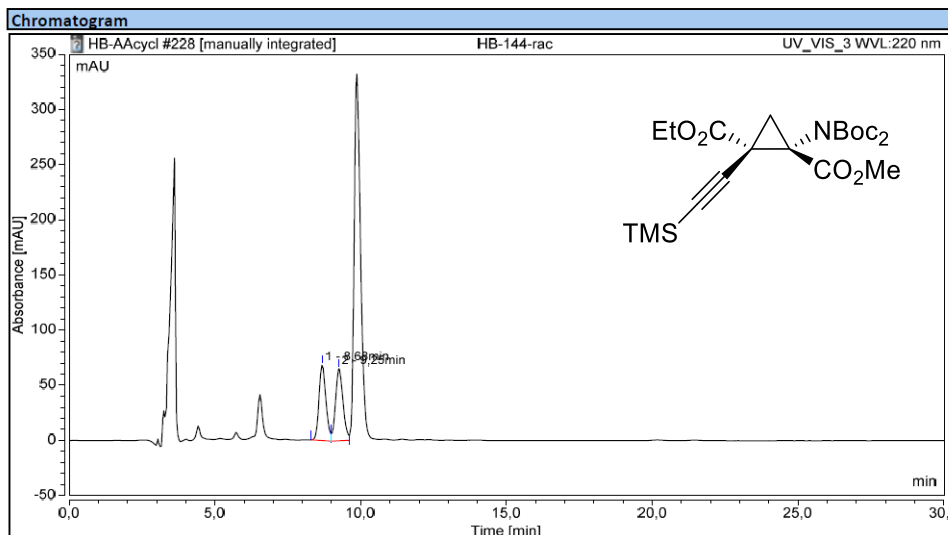

**Integration Results**

| No.           | Peak Name | Retention Time min | Area mAU*min  | Height mAU     | Relative Area % | Relative Height % |
|---------------|-----------|--------------------|---------------|----------------|-----------------|-------------------|
| 1             |           | 8,68               | 18,954        | 68,663         | 49,61           | 51,24             |
| 2             |           | 9,25               | 19,253        | 65,351         | 50,39           | 48,76             |
| <b>Total:</b> |           |                    | <b>38,207</b> | <b>134,014</b> | <b>100,00</b>   | <b>100,00</b>     |

| Injection Details    |                          |                         |
|----------------------|--------------------------|-------------------------|
| Injection Name:      | HB-78-rac                | Run Time (min): 30,00   |
| Vial Number:         | RA2                      | Injection Volume: 10,00 |
| Injection Type:      | Unknown                  | Channel: UV_VIS_3       |
| Comment:             | IE_Hept:iPrOH 90/10 20°C | Wavelength: 220         |
| Instrument Method:   | 90A-10C                  | Bandwidth: 4            |
| Processing Method:   | methode traitement       | Dilution Factor: 1,0000 |
| Injection Date/Time: | 29/mars/22 09:09         | Sample Weight: 1,0000   |

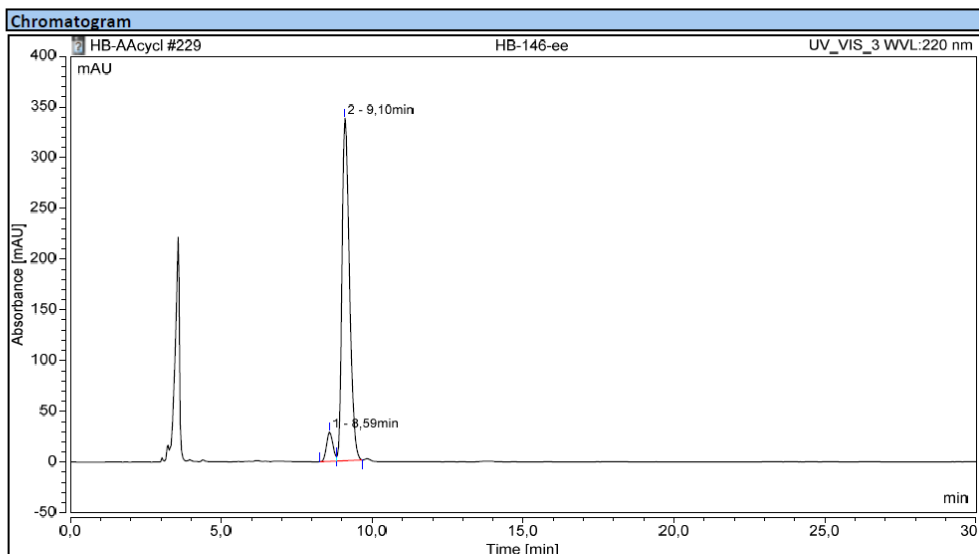

**Integration Results**

| No.           | Peak Name | Retention Time min | Area mAU*min   | Height mAU     | Relative Area % | Relative Height % |
|---------------|-----------|--------------------|----------------|----------------|-----------------|-------------------|
| 1             |           | 8,59               | 7,096          | 29,026         | 6,83            | 7,92              |
| 2             |           | 9,10               | 96,734         | 337,587        | 93,17           | 92,08             |
| <b>Total:</b> |           |                    | <b>103,829</b> | <b>366,614</b> | <b>100,00</b>   | <b>100,00</b>     |

**Compound 16** : 2-ethyl 1-methyl (1S,2S)-1-(bis(tert-butoxycarbonyl)amino)-2-(phenylethynyl)cyclopropane-1,2-dicarboxylate

| Injection Details    |                          |                         |
|----------------------|--------------------------|-------------------------|
| Injection Name:      | HB-78-rac                | Run Time (min): 30,00   |
| Vial Number:         | GB2                      | Injection Volume: 10,00 |
| Injection Type:      | Unknown                  | Channel: UV_VIS_3       |
| Comment:             | IE_Hept:iPrOH 90/10 20°C | Wavelength: 220         |
| Instrument Method:   | 90A-10C                  | Bandwidth: 4            |
| Processing Method:   | methode traitement       | Dilution Factor: 1,0000 |
| Injection Date/Time: | 04/avr./22 13:53         | Sample Weight: 1,0000   |

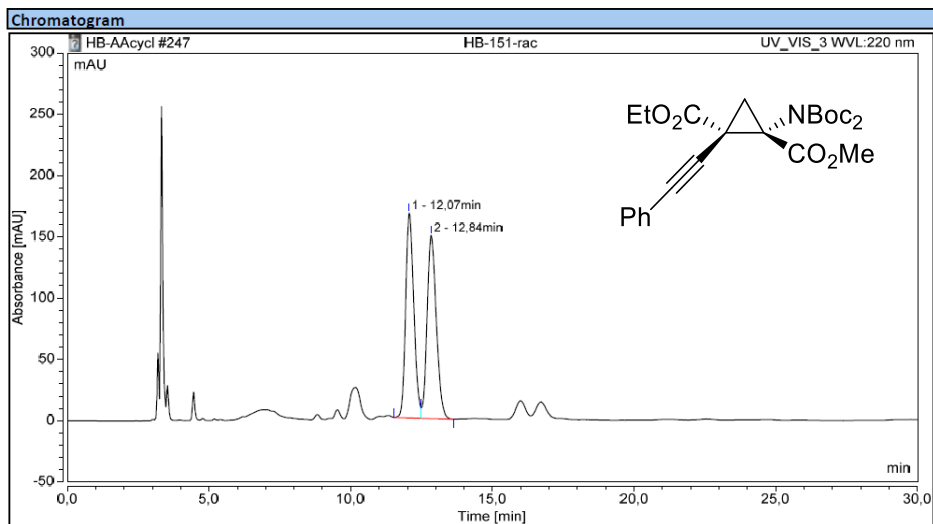

**Integration Results**

| No.           | Peak Name | Retention Time min | Area mAU*min   | Height mAU     | Relative Area % | Relative Height % |
|---------------|-----------|--------------------|----------------|----------------|-----------------|-------------------|
| 1             |           | 12,07              | 56,890         | 167,253        | 49,76           | 52,79             |
| 2             |           | 12,84              | 56,432         | 149,545        | 50,24           | 47,21             |
| <b>Total:</b> |           |                    | <b>112,322</b> | <b>316,797</b> | <b>100,00</b>   | <b>100,00</b>     |

| Injection Details    |                          |                         |
|----------------------|--------------------------|-------------------------|
| Injection Name:      | HB-78-rac                | Run Time (min): 30,00   |
| Vial Number:         | GA5                      | Injection Volume: 10,00 |
| Injection Type:      | Unknown                  | Channel: UV_VIS_3       |
| Comment:             | IE_Hept:iPrOH 90/10 20°C | Wavelength: 220         |
| Instrument Method:   | 90A-10C                  | Bandwidth: 4            |
| Processing Method:   | methode traitement       | Dilution Factor: 1,0000 |
| Injection Date/Time: | 04/avr./22 13:22         | Sample Weight: 1,0000   |

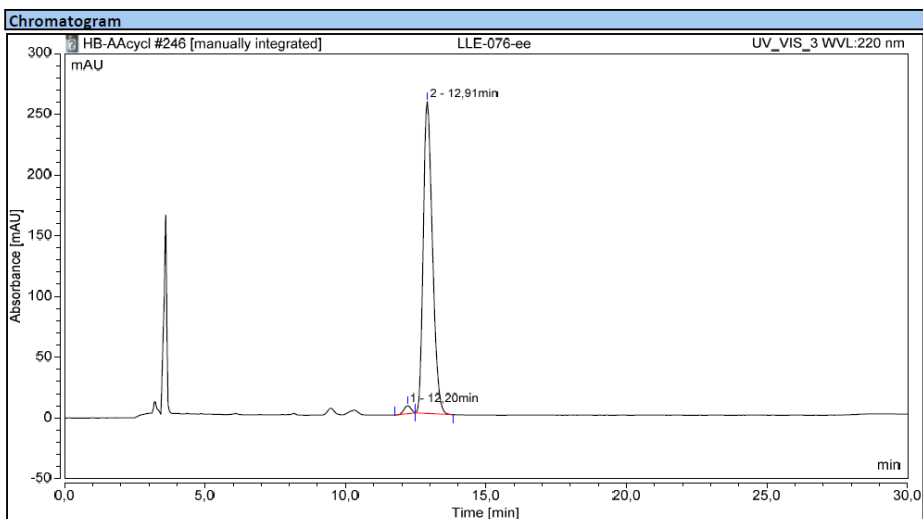

**Integration Results**

| No.           | Peak Name | Retention Time min | Area mAU*min  | Height mAU     | Relative Area % | Relative Height % |
|---------------|-----------|--------------------|---------------|----------------|-----------------|-------------------|
| 1             |           | 12,20              | 1,898         | 6,761          | 1,91            | 2,57              |
| 2             |           | 12,91              | 97,370        | 256,824        | 98,09           | 97,43             |
| <b>Total:</b> |           |                    | <b>99,268</b> | <b>263,585</b> | <b>100,00</b>   | <b>100,00</b>     |

**Compound 17 : 2-ethyl 1-methyl (1S,2S)-1-(bis(tert-butoxycarbonyl)amino)-2-((E)-styryl)cyclopropane-1,2-dicarboxylate**

| Injection Details    |                          |                         |
|----------------------|--------------------------|-------------------------|
| Injection Name:      | HB-78-rac                | Run Time (min): 30,00   |
| Vial Number:         | RB5                      | Injection Volume: 10,00 |
| Injection Type:      | Unknown                  | Channel: UV_VIS_3       |
| Comment:             | IC_Hept:iPrOH 70/30 20°C | Wavelength: 220         |
| Instrument Method:   | 70A-30C                  | Bandwidth: 4            |
| Processing Method:   | methode traitement       | Dilution Factor: 1,0000 |
| Injection Date/Time: | 03/mars/22 08:39         | Sample Weight: 1,0000   |

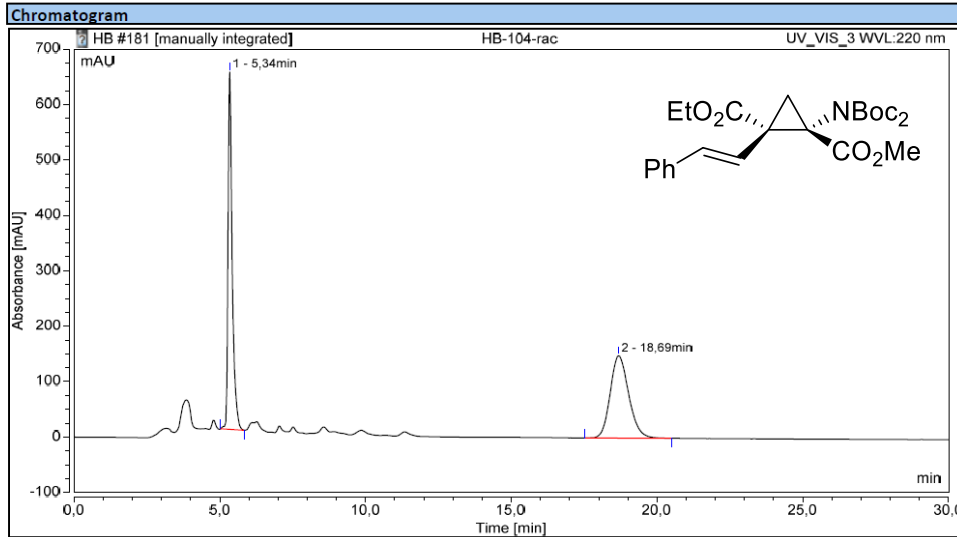

**Integration Results**

| No.    | Peak Name | Retention Time min | Area mAU*min | Height mAU | Relative Area % | Relative Height % |
|--------|-----------|--------------------|--------------|------------|-----------------|-------------------|
| 1      |           | 5,34               | 106,999      | 644,855    | 49,48           | 81,26             |
| 2      |           | 18,69              | 109,250      | 148,679    | 50,52           | 18,74             |
| Total: |           |                    | 216 249      | 793 535    | 100 00          | 100 00            |

| Injection Details    |                          |                         |
|----------------------|--------------------------|-------------------------|
| Injection Name:      | HB-78-rac                | Run Time (min): 30,00   |
| Vial Number:         | RB6                      | Injection Volume: 10,00 |
| Injection Type:      | Unknown                  | Channel: UV_VIS_3       |
| Comment:             | IC_Hept:iPrOH 70/30 20°C | Wavelength: 220         |
| Instrument Method:   | 70A-30C                  | Bandwidth: 4            |
| Processing Method:   | methode traitement       | Dilution Factor: 1,0000 |
| Injection Date/Time: | 03/mars/22 09:10         | Sample Weight: 1,0000   |

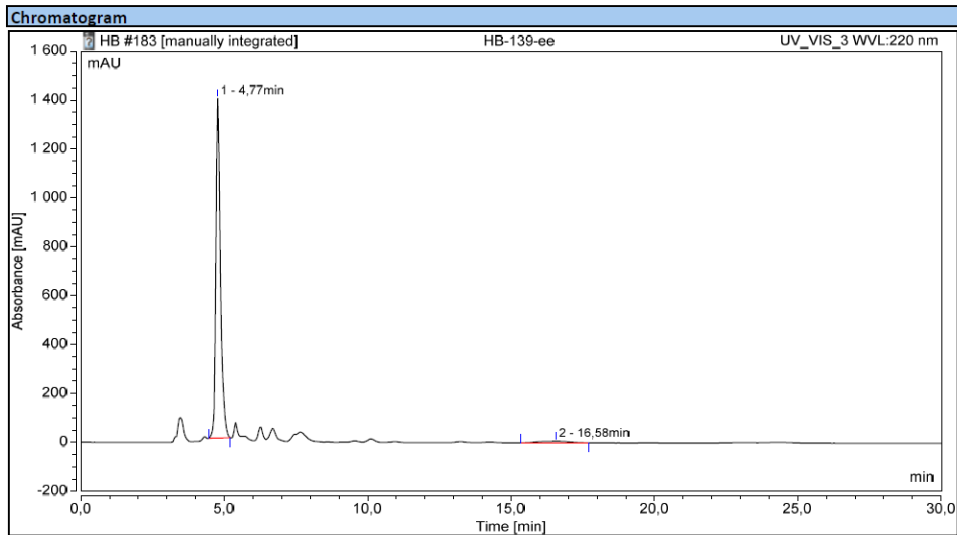

**Integration Results**

| No.    | Peak Name | Retention Time min | Area mAU*min | Height mAU | Relative Area % | Relative Height % |
|--------|-----------|--------------------|--------------|------------|-----------------|-------------------|
| 1      |           | 4,77               | 253,923      | 1390,154   | 96,97           | 99,49             |
| 2      |           | 16,58              | 7,935        | 7,061      | 3,03            | 0,51              |
| Total: |           |                    | 261,858      | 1397,216   | 100,00          | 100,00            |

**Compound 18**: methyl (1*S*,2*R*)-2-((tert-butoxycarbonyl)amino)-2-(diethoxyphosphoryl)-1-phenyl cyclopropane-1-carboxylate

| Injection Details    |                     |                         |
|----------------------|---------------------|-------------------------|
| Injection Name:      | AI237               | Run Time (min): 20.00   |
| Vial Number:         | BC3                 | Injection Volume: 15.00 |
| Injection Type:      | Unknown             | Channel: UV_VIS_3       |
| Comment:             | IE hept/oprOH       | Wavelength: 210         |
| Instrument Method:   | 80A-20C             | Bandwidth: 2            |
| Processing Method:   | methode traitement2 | Dilution Factor: 1.0000 |
| Injection Date/Time: | 22/sept/23 16:57    | Sample Weight: 1.0000   |

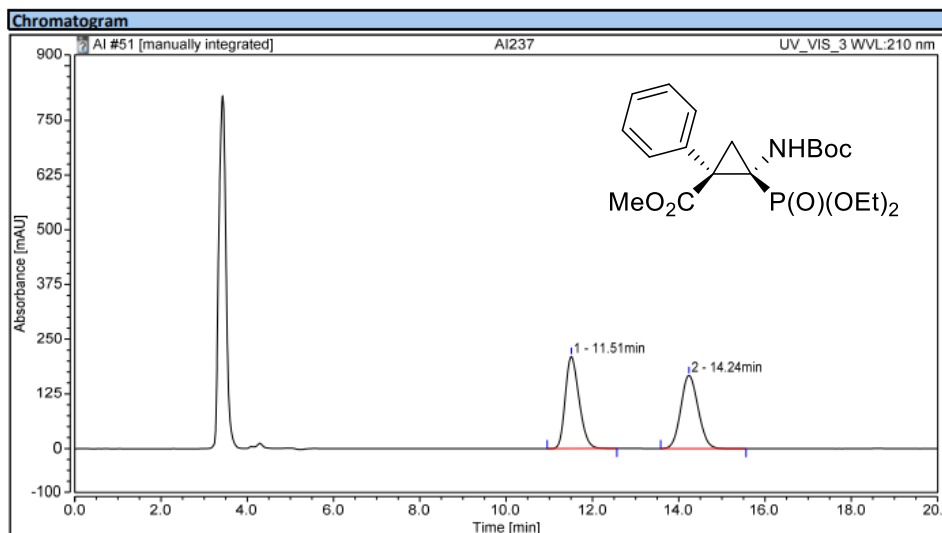

**Integration Results**

| No.           | Peak Name | Retention Time min | Area mAU*min   | Height mAU     | Relative Area % | Relative Height % |
|---------------|-----------|--------------------|----------------|----------------|-----------------|-------------------|
| 1             |           | 11.51              | 78.271         | 210.862        | 50.01           | 55.74             |
| 2             |           | 14.24              | 78.247         | 167.453        | 49.99           | 44.26             |
| <b>Total:</b> |           |                    | <b>156.518</b> | <b>378.315</b> | <b>100.00</b>   | <b>100.00</b>     |

| Injection Details    |                     |                         |
|----------------------|---------------------|-------------------------|
| Injection Name:      | AT-001p             | Run Time (min): 26.67   |
| Vial Number:         | GE1                 | Injection Volume: 10.00 |
| Injection Type:      | Unknown             | Channel: UV_VIS_3       |
| Comment:             | IE hept/oprOH       | Wavelength: 210         |
| Instrument Method:   | 80A-20C             | Bandwidth: 2            |
| Processing Method:   | methode traitement2 | Dilution Factor: 1.0000 |
| Injection Date/Time: | 23/nov./23 15:55    | Sample Weight: 1.0000   |

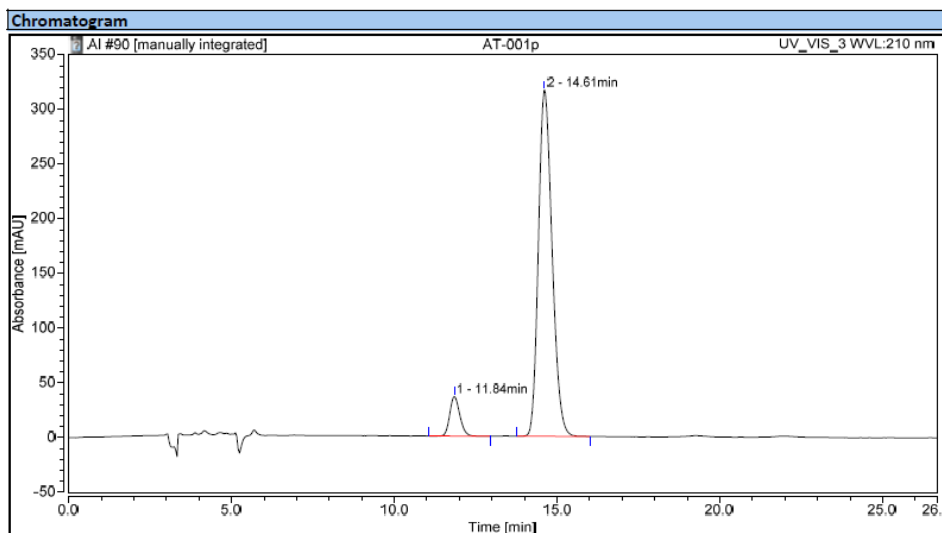

**Integration Results**

| No.           | Peak Name | Retention Time min | Area mAU*min   | Height mAU     | Relative Area % | Relative Height % |
|---------------|-----------|--------------------|----------------|----------------|-----------------|-------------------|
| 1             |           | 11.84              | 12.892         | 36.166         | 7.74            | 10.25             |
| 2             |           | 14.61              | 153.586        | 316.615        | 92.26           | 89.75             |
| <b>Total:</b> |           |                    | <b>166.479</b> | <b>352.781</b> | <b>100.00</b>   | <b>100.00</b>     |

**Compound 19** : methyl (1*S*,2*R*)-2-(((benzyloxy)carbonyl)amino)-2-(diethoxyphosphoryl)-1-phenylcyclopropane-1-carboxylate

| Injection Details    |                                                             |                         |
|----------------------|-------------------------------------------------------------|-------------------------|
| Injection Name:      | AT-013 rac                                                  | Run Time (min): 20,00   |
| Vial Number:         | BA3                                                         | Injection Volume: 10,00 |
| Injection Type:      | Unknown                                                     | Channel: UV_VIS_2       |
| Comment:             | IB 250*4.6 v5µm A: heptane D:heptane:iprOH 9:1 20°C 1ml/min | Wavelength: 210         |
| Instrument Method:   | 90A-10C20min                                                | Bandwidth: 2            |
| Processing Method:   | methode traitement                                          | Dilution Factor: 1,0000 |
| Injection Date/Time: | 20/juin/24 16:01                                            | Sample Weight: 1,0000   |

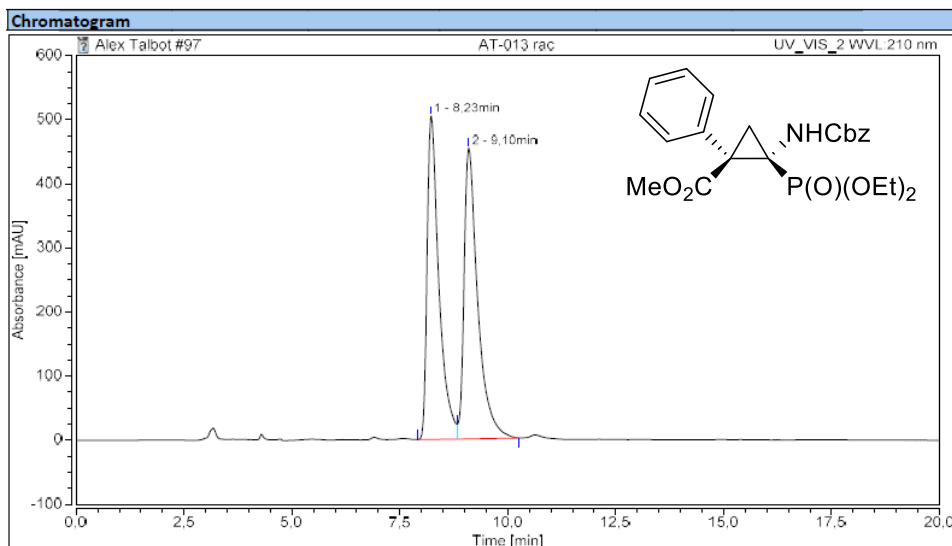

**Integration Results**

| No.           | Peak Name | Retention Time min | Area mAU*min   | Height mAU     | Relative Area % | Relative Height % |
|---------------|-----------|--------------------|----------------|----------------|-----------------|-------------------|
| 1             |           | 8,23               | 159,380        | 504,526        | 48,89           | 52,65             |
| 2             |           | 9,10               | 166,629        | 453,667        | 51,11           | 47,35             |
| <b>Total:</b> |           |                    | <b>326,009</b> | <b>958,193</b> | <b>100,00</b>   | <b>100,00</b>     |

| Injection Details    |                                                             |                         |
|----------------------|-------------------------------------------------------------|-------------------------|
| Injection Name:      | AT-012 ee                                                   | Run Time (min): 20,00   |
| Vial Number:         | BA4                                                         | Injection Volume: 10,00 |
| Injection Type:      | Unknown                                                     | Channel: UV_VIS_2       |
| Comment:             | IB 250*4.6 v5µm A: heptane D:heptane:iprOH 9:1 20°C 1ml/min | Wavelength: 210         |
| Instrument Method:   | 90A-10C20min                                                | Bandwidth: 2            |
| Processing Method:   | methode traitement                                          | Dilution Factor: 1,0000 |
| Injection Date/Time: | 20/juin/24 16:21                                            | Sample Weight: 1,0000   |

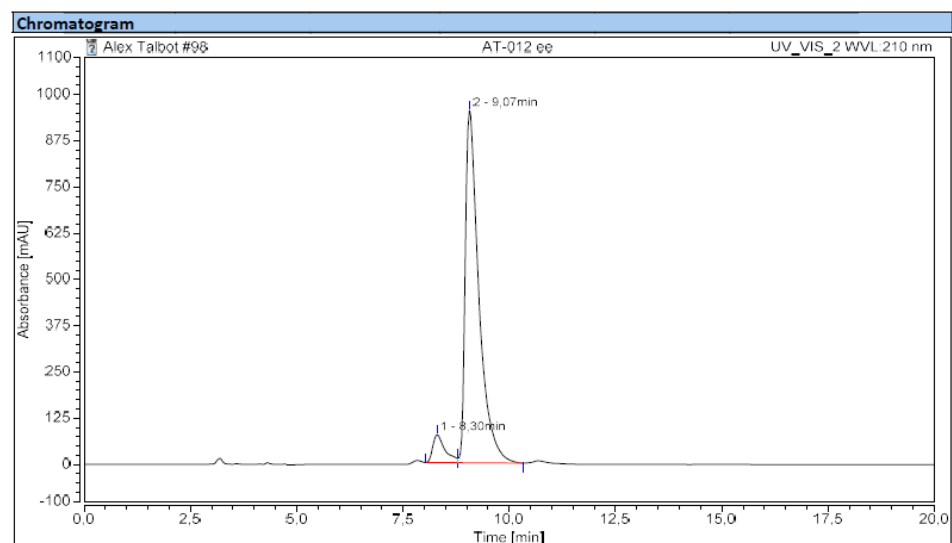

**Integration Results**

| No.           | Peak Name | Retention Time min | Area mAU*min   | Height mAU      | Relative Area % | Relative Height % |
|---------------|-----------|--------------------|----------------|-----------------|-----------------|-------------------|
| 1             |           | 8,30               | 25,364         | 75,370          | 6,72            | 7,33              |
| 2             |           | 9,07               | 352,197        | 952,717         | 93,28           | 92,67             |
| <b>Total:</b> |           |                    | <b>377,561</b> | <b>1028,086</b> | <b>100,00</b>   | <b>100,00</b>     |

**Compound 20**: ethyl (1S,2R)-2-(((benzyloxy)carbonyl)amino)-2-(diethoxyphosphoryl)-1-phenyl cyclopropane-1-carboxylate

| Injection Details    |                                                |                         |
|----------------------|------------------------------------------------|-------------------------|
| Injection Name:      | AT-032_rac                                     | Run Time (min): 20.00   |
| Vial Number:         | BE1                                            | Injection Volume: 10.00 |
| Injection Type:      | Unknown                                        | Channel: UV_VIS_2       |
| Comment:             | IB 250*4.6 v5µm A: heptane C:EtOH 20°C 1ml/min | Wavelength: 210         |
| Instrument Method:   | 95A-5B 20                                      | Bandwidth: 2            |
| Processing Method:   | methode traitement                             | Dilution Factor: 1.0000 |
| Injection Date/Time: | 31/janv./24 10:51                              | Sample Weight: 1.0000   |

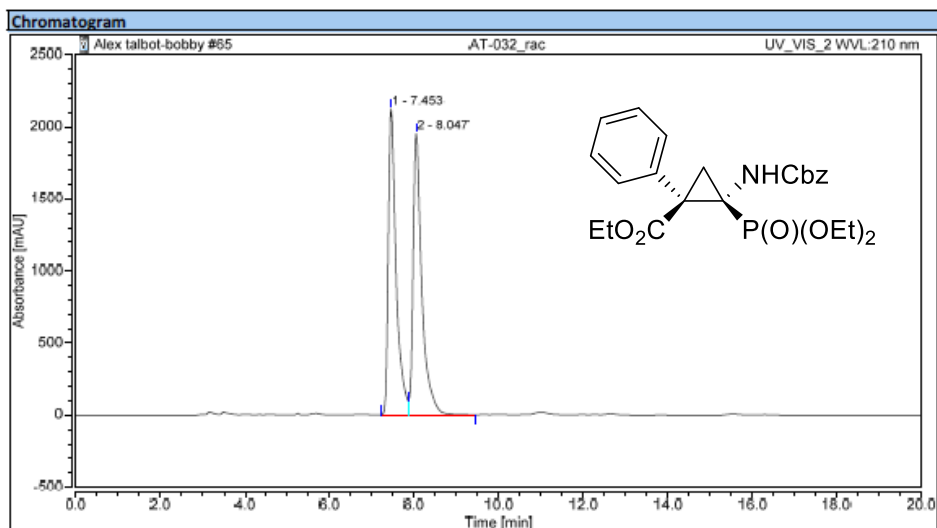

**Integration Results**

| No.           | Peak Name | Retention Time min | Area mAU*min   | Height mAU      | Relative Area % | Relative Height % | Amount n.a. |
|---------------|-----------|--------------------|----------------|-----------------|-----------------|-------------------|-------------|
| 1             |           | 7.453              | 455.288        | 2125.404        | 49.30           | 52.13             | n.a.        |
| 2             |           | 8.047              | 468.230        | 1952.024        | 50.70           | 47.87             | n.a.        |
| <b>Total:</b> |           |                    | <b>923.518</b> | <b>4077.428</b> | <b>100.00</b>   | <b>100.00</b>     |             |

| Injection Details    |                                                |                         |
|----------------------|------------------------------------------------|-------------------------|
| Injection Name:      | AT-033_ee                                      | Run Time (min): 20.00   |
| Vial Number:         | GC2                                            | Injection Volume: 15.00 |
| Injection Type:      | Unknown                                        | Channel: UV_VIS_3       |
| Comment:             | IB 250*4.6 v5µm A: heptane B:etOH 20°C 1ml/min | Wavelength: 220         |
| Instrument Method:   | 95A-5B 25                                      | Bandwidth: 4            |
| Processing Method:   | methode traitement                             | Dilution Factor: 1.0000 |
| Injection Date/Time: | 05/janv./24 15:00                              | Sample Weight: 1.0000   |

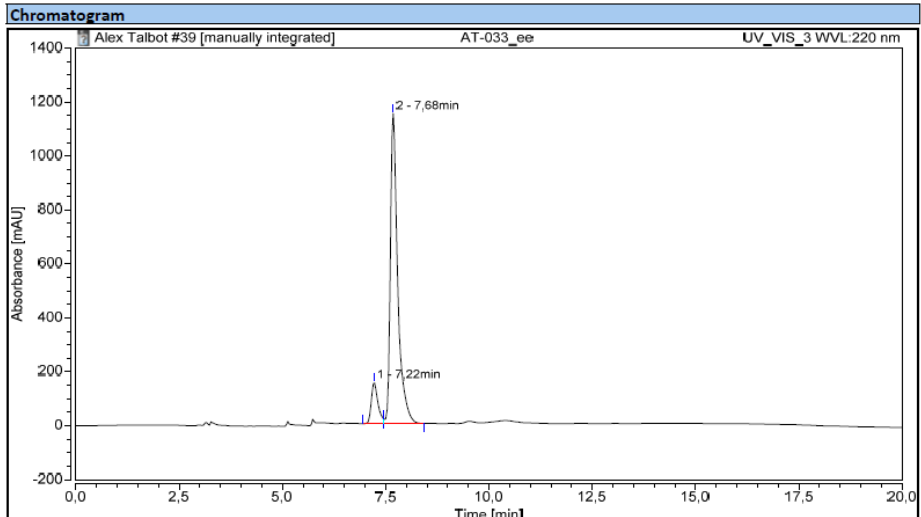

**Integration Results**

| No.           | Peak Name | Retention Time min | Area mAU*min   | Height mAU      | Relative Area % | Relative Height % |
|---------------|-----------|--------------------|----------------|-----------------|-----------------|-------------------|
| 1             |           | 7.22               | 28.186         | 152.959         | 10.62           | 11.74             |
| 2             |           | 7.68               | 237.236        | 1149.513        | 89.38           | 88.26             |
| <b>Total:</b> |           |                    | <b>265.422</b> | <b>1302.472</b> | <b>100.00</b>   | <b>100.00</b>     |

**Compound 21** : methyl (1*S*,2*R*)-2-(((benzyloxy)carbonyl)amino)-2-(diethoxyphosphoryl)-1-(*p*-tolyl) cyclopropane-1-carboxylate

| Injection Details    |                                                |                         |
|----------------------|------------------------------------------------|-------------------------|
| Injection Name:      | AT-057_rac                                     | Run Time (min): 20.00   |
| Vial Number:         | BE3                                            | Injection Volume: 15.00 |
| Injection Type:      | Unknown                                        | Channel: UV_VIS_2       |
| Comment:             | IA 250*4.6 v5µm A: heptane C:EtOH 20°C 1ml/min | Wavelength: 210         |
| Instrument Method:   | 95A-5B 20                                      | Bandwidth: 2            |
| Processing Method:   | methode traitement                             | Dilution Factor: 1.0000 |
| Injection Date/Time: | 30/janv./24 12:00                              | Sample Weight: 1.0000   |

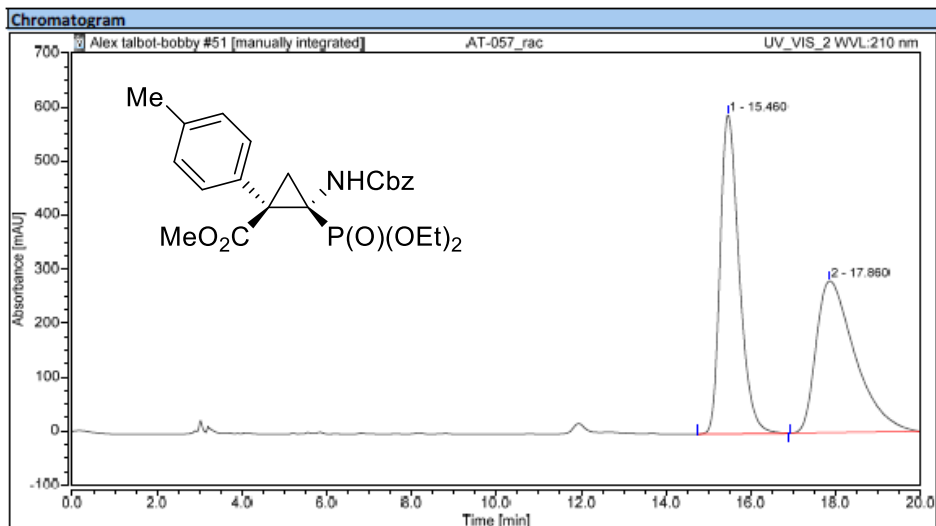

| No.           | Peak Name | Retention Time min | Area mAU*min   | Height mAU     | Relative Area % | Relative Height % | Amount n.a. |
|---------------|-----------|--------------------|----------------|----------------|-----------------|-------------------|-------------|
| 1             |           | 15.460             | 306.302        | 590.851        | 50.66           | 67.78             | n.a.        |
| 2             |           | 17.860             | 298.281        | 280.906        | 49.34           | 32.22             | n.a.        |
| <b>Total:</b> |           |                    | <b>604.583</b> | <b>871.757</b> | <b>100.00</b>   | <b>100.00</b>     |             |

| Injection Details    |                                                |                         |
|----------------------|------------------------------------------------|-------------------------|
| Injection Name:      | AT-058 ee                                      | Run Time (min): 20.00   |
| Vial Number:         | BD3                                            | Injection Volume: 15.00 |
| Injection Type:      | Unknown                                        | Channel: UV_VIS_2       |
| Comment:             | IA 250*4.6 v5µm A: heptane C:EtOH 20°C 1ml/min | Wavelength: 210         |
| Instrument Method:   | 95A-5B 20                                      | Bandwidth: 2            |
| Processing Method:   | methode traitement                             | Dilution Factor: 1.0000 |
| Injection Date/Time: | 30/janv./24 12:22                              | Sample Weight: 1.0000   |

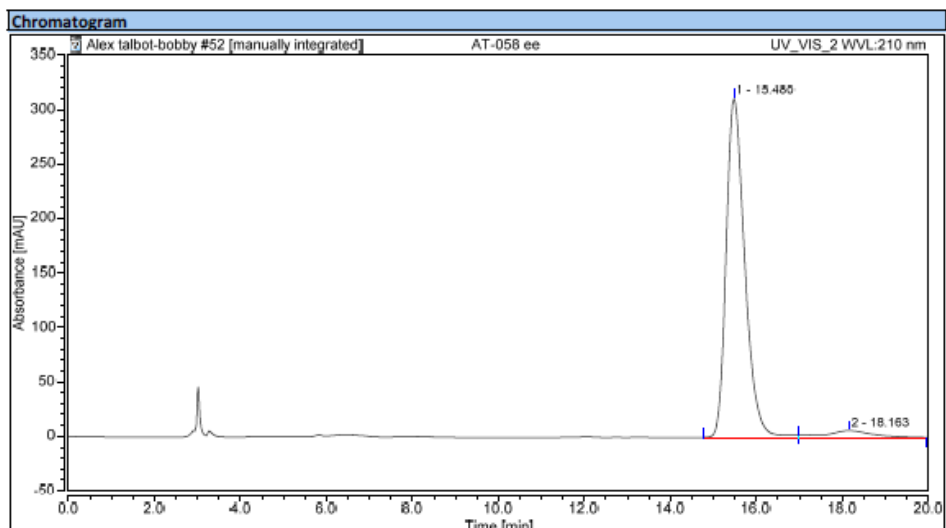

| No.           | Peak Name | Retention Time min | Area mAU*min   | Height mAU     | Relative Area % | Relative Height % | Amount n.a. |
|---------------|-----------|--------------------|----------------|----------------|-----------------|-------------------|-------------|
| 1             |           | 15.480             | 155.796        | 311.227        | 95.21           | 98.02             | n.a.        |
| 2             |           | 18.163             | 7.841          | 6.288          | 4.79            | 1.98              | n.a.        |
| <b>Total:</b> |           |                    | <b>163.637</b> | <b>317.515</b> | <b>100.00</b>   | <b>100.00</b>     |             |

**Compound 22**: ethyl (1S,2R)-2-(((benzyloxy)carbonyl)amino)-2-(diethoxyphosphoryl)-1-(p-tolyl) cyclopropane-1-carboxylate

| Injection Details    |                                                |                         |
|----------------------|------------------------------------------------|-------------------------|
| Injection Name:      | AT-059_rac                                     | Run Time (min): 30.00   |
| Vial Number:         | BE4                                            | Injection Volume: 15.00 |
| Injection Type:      | Unknown                                        | Channel: UV_VIS_2       |
| Comment:             | IB 250*4.6 v5µm A: heptane C:EtOH 20°C 1ml/min | Wavelength: 210         |
| Instrument Method:   | 98A-2B 20C-30min                               | Bandwidth: 2            |
| Processing Method:   | methode traitement                             | Dilution Factor: 1.0000 |
| Injection Date/Time: | 30/janv./24 14:42                              | Sample Weight: 1.0000   |

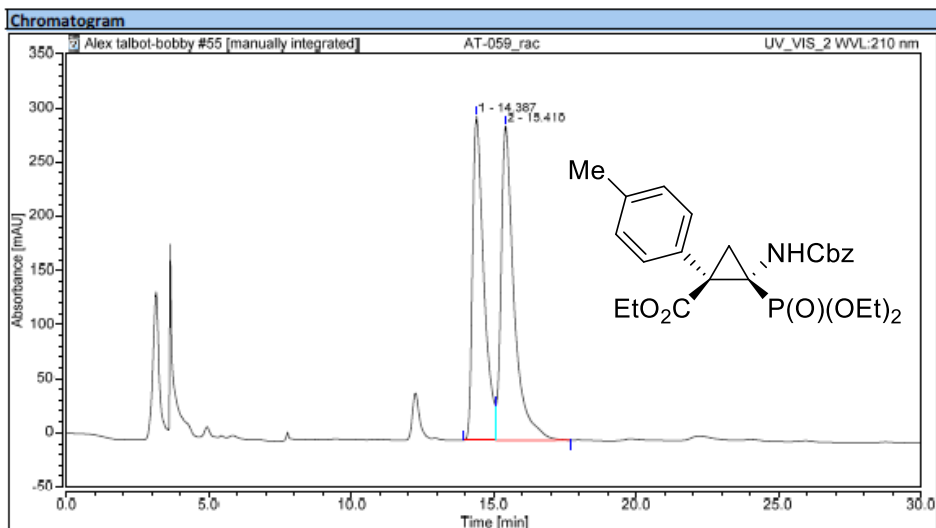

| No.           | Peak Name | Retention Time min | Area mAU*min   | Height mAU     | Relative Area % | Relative Height % | Amount n.a. |
|---------------|-----------|--------------------|----------------|----------------|-----------------|-------------------|-------------|
| 1             |           | 14.387             | 137.039        | 299.227        | 47.09           | 50.77             | n.a.        |
| 2             |           | 15.410             | 153.984        | 290.167        | 52.91           | 49.23             | n.a.        |
| <b>Total:</b> |           |                    | <b>291.023</b> | <b>589.394</b> | <b>100.00</b>   | <b>100.00</b>     |             |

| Injection Details    |                                                |                         |
|----------------------|------------------------------------------------|-------------------------|
| Injection Name:      | AT-060 ee                                      | Run Time (min): 18.29   |
| Vial Number:         | BD4                                            | Injection Volume: 15.00 |
| Injection Type:      | Unknown                                        | Channel: UV_VIS_2       |
| Comment:             | IB 250*4.6 v5µm A: heptane C:EtOH 20°C 1ml/min | Wavelength: 210         |
| Instrument Method:   | 98A-2B 20C-30min                               | Bandwidth: 2            |
| Processing Method:   | methode traitement                             | Dilution Factor: 1.0000 |
| Injection Date/Time: | 30/janv./24 15:14                              | Sample Weight: 1.0000   |

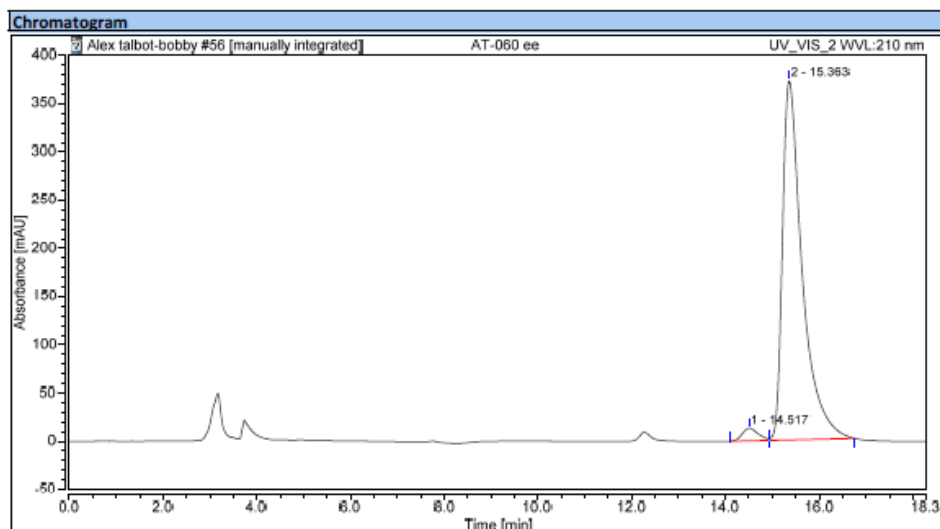

| No.           | Peak Name | Retention Time min | Area mAU*min   | Height mAU     | Relative Area % | Relative Height % | Amount n.a. |
|---------------|-----------|--------------------|----------------|----------------|-----------------|-------------------|-------------|
| 1             |           | 14.517             | 5.154          | 13.122         | 2.76            | 3.40              | n.a.        |
| 2             |           | 15.363             | 181.568        | 372.684        | 97.24           | 96.60             | n.a.        |
| <b>Total:</b> |           |                    | <b>186.722</b> | <b>385.806</b> | <b>100.00</b>   | <b>100.00</b>     |             |



**Compound 23**: methyl (1*S*,2*R*)-2-(((benzyloxy)carbonyl)amino)-2-(diethoxyphosphoryl)-1-(4-methoxyphenyl)cyclopropane-1-carboxylate

| Injection Details    |                                                 |                         |
|----------------------|-------------------------------------------------|-------------------------|
| Injection Name:      | AT-069_rac                                      | Run Time (min): 30.00   |
| Vial Number:         | BE8                                             | Injection Volume: 15.00 |
| Injection Type:      | Unknown                                         | Channel: UV_VIS_2       |
| Comment:             | IA 250*4.6 v5µm A: heptane C:iPrOH 20°C 1ml/min | Wavelength: 230         |
| Instrument Method:   | 80A-20C                                         | Bandwidth: 2            |
| Processing Method:   | methode traitement                              | Dilution Factor: 1.0000 |
| Injection Date/Time: | 30/janv./24 09:53                               | Sample Weight: 1.0000   |

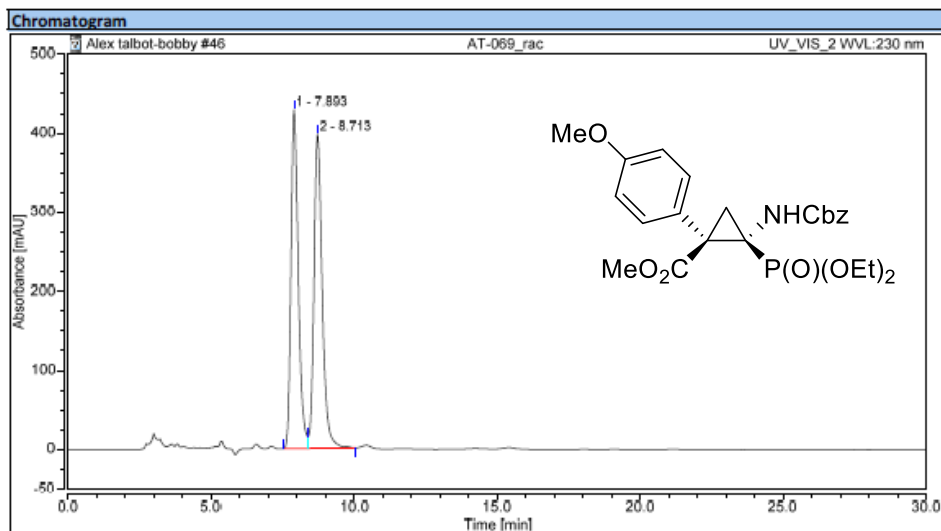

**Integration Results**

| No.           | Peak Name | Retention Time min | Area mAU*min   | Height mAU     | Relative Area % | Relative Height % | Amount n.a. |
|---------------|-----------|--------------------|----------------|----------------|-----------------|-------------------|-------------|
| 1             |           | 7.893              | 126.942        | 428.643        | 48.85           | 51.89             | n.a.        |
| 2             |           | 8.713              | 132.899        | 397.480        | 51.15           | 48.11             | n.a.        |
| <b>Total:</b> |           |                    | <b>259.841</b> | <b>826.123</b> | <b>100.00</b>   | <b>100.00</b>     |             |

| Injection Details    |                                                 |                         |
|----------------------|-------------------------------------------------|-------------------------|
| Injection Name:      | AT-070 ee                                       | Run Time (min): 30.00   |
| Vial Number:         | BD8                                             | Injection Volume: 15.00 |
| Injection Type:      | Unknown                                         | Channel: UV_VIS_2       |
| Comment:             | IA 250*4.6 v5µm A: heptane C:iPrOH 20°C 1ml/min | Wavelength: 230         |
| Instrument Method:   | 80A-20C                                         | Bandwidth: 2            |
| Processing Method:   | methode traitement                              | Dilution Factor: 1.0000 |
| Injection Date/Time: | 30/janv./24 10:25                               | Sample Weight: 1.0000   |

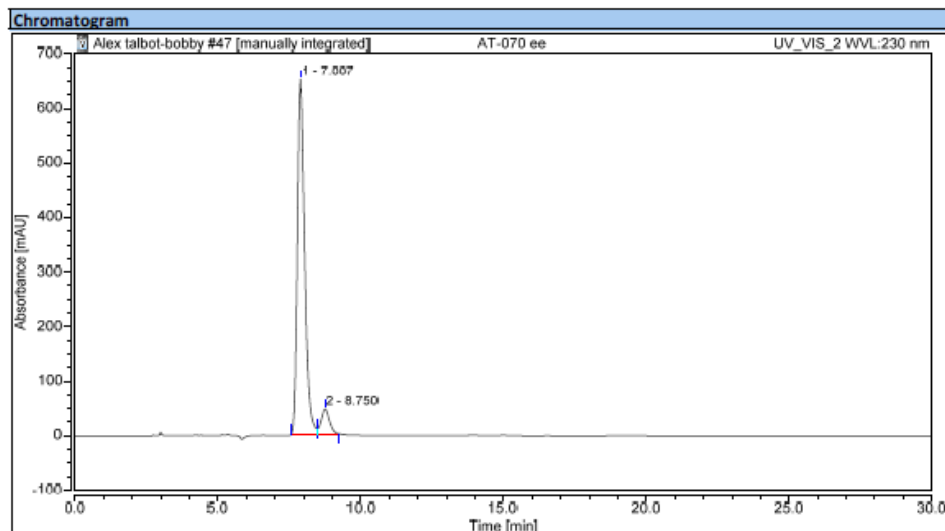

**Integration Results**

| No.           | Peak Name | Retention Time min | Area mAU*min   | Height mAU     | Relative Area % | Relative Height % | Amount n.a. |
|---------------|-----------|--------------------|----------------|----------------|-----------------|-------------------|-------------|
| 1             |           | 7.887              | 191.352        | 649.658        | 92.71           | 93.45             | n.a.        |
| 2             |           | 8.750              | 15.051         | 45.544         | 7.29            | 6.55              | n.a.        |
| <b>Total:</b> |           |                    | <b>206.403</b> | <b>695.201</b> | <b>100.00</b>   | <b>100.00</b>     |             |

**Compound 24** : methyl (1R,2S)-1-([1,1'-biphenyl]-4-yl)-2-(((benzyloxy)carbonyl)amino)-2-(diethoxyphosphoryl)cyclopropane-1-carboxylate

| Injection Details    |                                                |                         |
|----------------------|------------------------------------------------|-------------------------|
| Injection Name:      | AT-137 rac                                     | Run Time (min): 25.00   |
| Vial Number:         | BE7                                            | Injection Volume: 15.00 |
| Injection Type:      | Unknown                                        | Channel: UV_VIS_2       |
| Comment:             | IB 250*4.6 v5µm A: heptane B:EtOH 20°C 1ml/min | Wavelength: 210         |
| Instrument Method:   | 95A-5B 20 25 min                               | Bandwidth: 2            |
| Processing Method:   | methode traitement                             | Dilution Factor: 1.0000 |
| Injection Date/Time: | 23/avr/24 15:37                                | Sample Weight: 1.0000   |

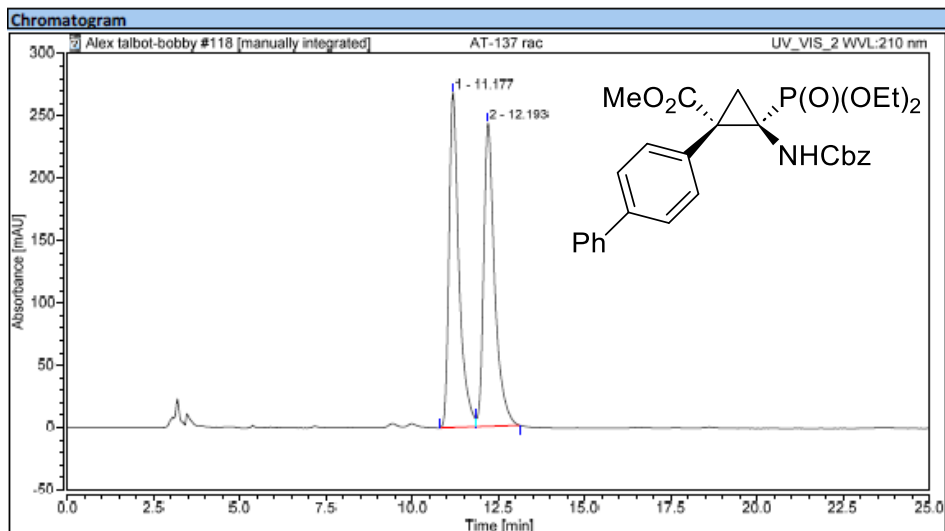

| Integration Results |           |                    |                |                |                 |                   |             |
|---------------------|-----------|--------------------|----------------|----------------|-----------------|-------------------|-------------|
| No.                 | Peak Name | Retention Time min | Area mAU*min   | Height mAU     | Relative Area % | Relative Height % | Amount n.a. |
| 1                   |           | 11.177             | 89.623         | 268.671        | 49.91           | 52.48             | n.a.        |
| 2                   |           | 12.193             | 89.947         | 243.245        | 50.09           | 47.52             | n.a.        |
| <b>Total:</b>       |           |                    | <b>179.570</b> | <b>511.916</b> | <b>100.00</b>   | <b>100.00</b>     |             |

| Injection Details    |                                                |                         |
|----------------------|------------------------------------------------|-------------------------|
| Injection Name:      | AT-138 ee                                      | Run Time (min): 25.00   |
| Vial Number:         | BE8                                            | Injection Volume: 15.00 |
| Injection Type:      | Unknown                                        | Channel: UV_VIS_2       |
| Comment:             | IB 250*4.6 v5µm A: heptane B:EtOH 20°C 1ml/min | Wavelength: 210         |
| Instrument Method:   | 95A-5B 20 25 min                               | Bandwidth: 2            |
| Processing Method:   | methode traitement                             | Dilution Factor: 1.0000 |
| Injection Date/Time: | 23/avr/24 16:13                                | Sample Weight: 1.0000   |

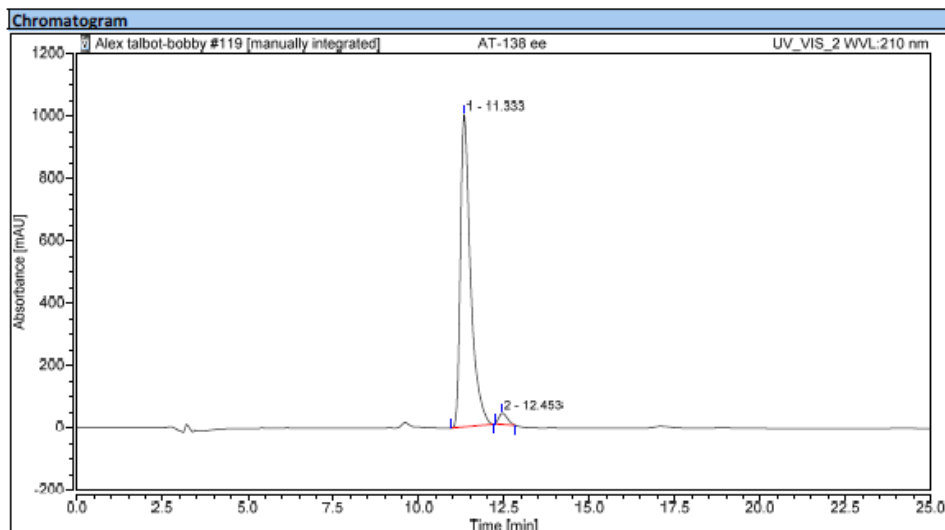

| Integration Results |           |                    |                |                 |                 |                   |             |
|---------------------|-----------|--------------------|----------------|-----------------|-----------------|-------------------|-------------|
| No.                 | Peak Name | Retention Time min | Area mAU*min   | Height mAU      | Relative Area % | Relative Height % | Amount n.a. |
| 1                   |           | 11.333             | 345.657        | 1003.433        | 97.00           | 96.50             | n.a.        |
| 2                   |           | 12.453             | 10.705         | 36.340          | 3.00            | 3.50              | n.a.        |
| <b>Total:</b>       |           |                    | <b>356.362</b> | <b>1039.773</b> | <b>100.00</b>   | <b>100.00</b>     |             |

**Compound 25**: methyl (1*S*,2*R*)-2-(((benzyloxy)carbonyl)amino)-2-(diethoxyphosphoryl)-1-(4-fluoro phenyl)cyclopropane-1-carboxylate

| Injection Details    |                                                 |                         |
|----------------------|-------------------------------------------------|-------------------------|
| Injection Name:      | AT-075_rac                                      | Run Time (min): 20.00   |
| Vial Number:         | BE1                                             | Injection Volume: 15.00 |
| Injection Type:      | Unknown                                         | Channel: UV_VIS_2       |
| Comment:             | IB 250*4.6 v5µm A: heptane B: EtOH 20°C 1ml/min | Wavelength: 210         |
| Instrument Method:   | 95A-5B 20                                       | Bandwidth: 2            |
| Processing Method:   | methode traitement                              | Dilution Factor: 1.0000 |
| Injection Date/Time: | 02/fevr./24 08:46                               | Sample Weight: 1.0000   |

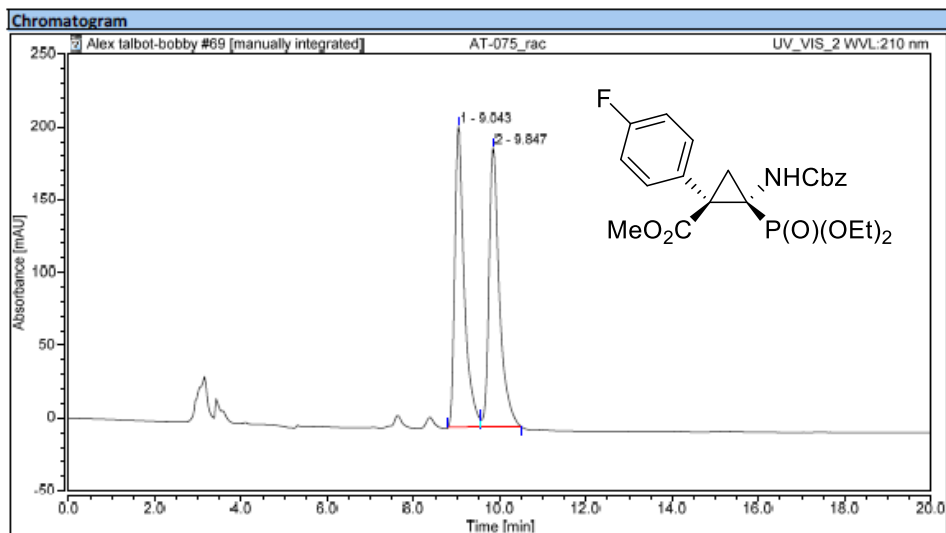

| Integration Results |           |                    |                |                |                 |                   |             |
|---------------------|-----------|--------------------|----------------|----------------|-----------------|-------------------|-------------|
| No.                 | Peak Name | Retention Time min | Area mAU*min   | Height mAU     | Relative Area % | Relative Height % | Amount n.a. |
| 1                   |           | 9.043              | 52.494         | 206.753        | 49.55           | 51.88             | n.a.        |
| 2                   |           | 9.847              | 53.456         | 191.749        | 50.45           | 48.12             | n.a.        |
| <b>Total:</b>       |           |                    | <b>105.950</b> | <b>398.502</b> | <b>100.00</b>   | <b>100.00</b>     |             |

| Injection Details    |                                                 |                         |
|----------------------|-------------------------------------------------|-------------------------|
| Injection Name:      | AT-076_ee                                       | Run Time (min): 20.00   |
| Vial Number:         | BE6                                             | Injection Volume: 15.00 |
| Injection Type:      | Unknown                                         | Channel: UV_VIS_2       |
| Comment:             | IB 250*4.6 v5µm A: heptane B: EtOH 20°C 1ml/min | Wavelength: 210         |
| Instrument Method:   | 95A-5B 20                                       | Bandwidth: 2            |
| Processing Method:   | methode traitement                              | Dilution Factor: 1.0000 |
| Injection Date/Time: | 02/fevr./24 10:41                               | Sample Weight: 1.0000   |

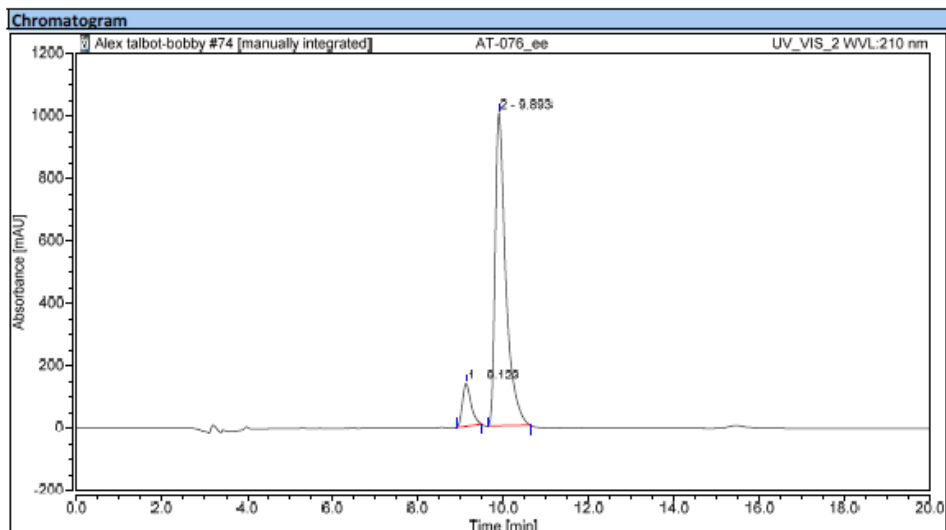

| Integration Results |           |                    |                |                 |                 |                   |             |
|---------------------|-----------|--------------------|----------------|-----------------|-----------------|-------------------|-------------|
| No.                 | Peak Name | Retention Time min | Area mAU*min   | Height mAU      | Relative Area % | Relative Height % | Amount n.a. |
| 1                   |           | 9.123              | 31.929         | 137.831         | 9.95            | 12.06             | n.a.        |
| 2                   |           | 9.893              | 288.841        | 1004.842        | 90.05           | 87.94             | n.a.        |
| <b>Total:</b>       |           |                    | <b>320.770</b> | <b>1142.674</b> | <b>100.00</b>   | <b>100.00</b>     |             |

**Compound 26**: methyl (1*S*,2*R*)-2-(((benzyloxy)carbonyl)amino)-1-(4-chlorophenyl)-2-(diethoxy phosphoryl)cyclopropane-1-carboxylate

| Injection Details    |                                                |                         |
|----------------------|------------------------------------------------|-------------------------|
| Injection Name:      | AT-101_rac                                     | Run Time (min): 20.00   |
| Vial Number:         | BE1                                            | Injection Volume: 15.00 |
| Injection Type:      | Unknown                                        | Channel: UV_VIS_2       |
| Comment:             | IB 250*4.6 v5µm A: heptane B:EtOH 20°C 1ml/min | Wavelength: 210         |
| Instrument Method:   | 97A-3B 20                                      | Bandwidth: 2            |
| Processing Method:   | methode traitement                             | Dilution Factor: 1.0000 |
| Injection Date/Time: | 27/fevr./24 09:47                              | Sample Weight: 1.0000   |

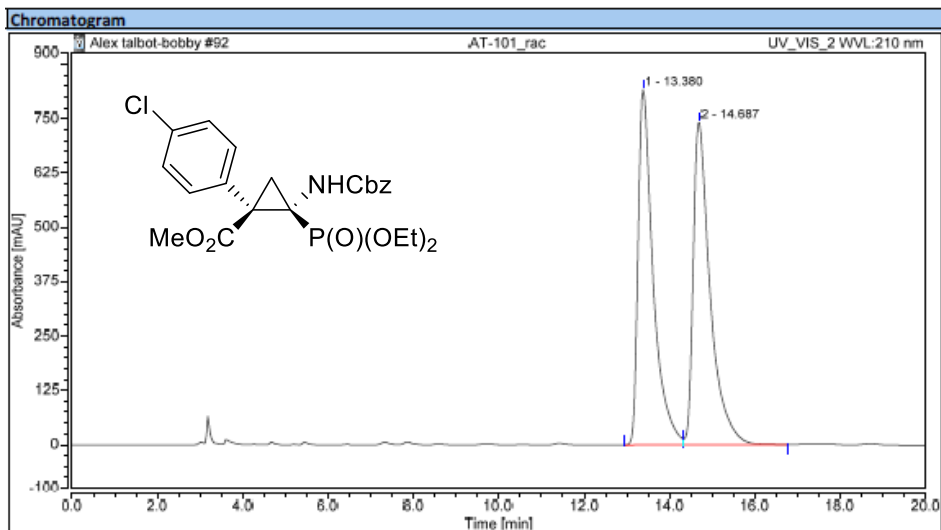

| Integration Results |           |                    |                |                 |                 |                   |             |
|---------------------|-----------|--------------------|----------------|-----------------|-----------------|-------------------|-------------|
| No.                 | Peak Name | Retention Time min | Area mAU*min   | Height mAU      | Relative Area % | Relative Height % | Amount n.a. |
| 1                   |           | 13.380             | 334.152        | 817.276         | 49.45           | 52.42             | n.a.        |
| 2                   |           | 14.687             | 341.520        | 741.926         | 50.55           | 47.58             | n.a.        |
| <b>Total:</b>       |           |                    | <b>675.672</b> | <b>1559.202</b> | <b>100.00</b>   | <b>100.00</b>     |             |

| Injection Details    |                                                |                         |
|----------------------|------------------------------------------------|-------------------------|
| Injection Name:      | AT-102 ee                                      | Run Time (min): 20.00   |
| Vial Number:         | BE2                                            | Injection Volume: 15.00 |
| Injection Type:      | Unknown                                        | Channel: UV_VIS_2       |
| Comment:             | IB 250*4.6 v5µm A: heptane B:EtOH 20°C 1ml/min | Wavelength: 210         |
| Instrument Method:   | 97A-3B 20                                      | Bandwidth: 2            |
| Processing Method:   | methode traitement                             | Dilution Factor: 1.0000 |
| Injection Date/Time: | 27/fevr./24 10:08                              | Sample Weight: 1.0000   |

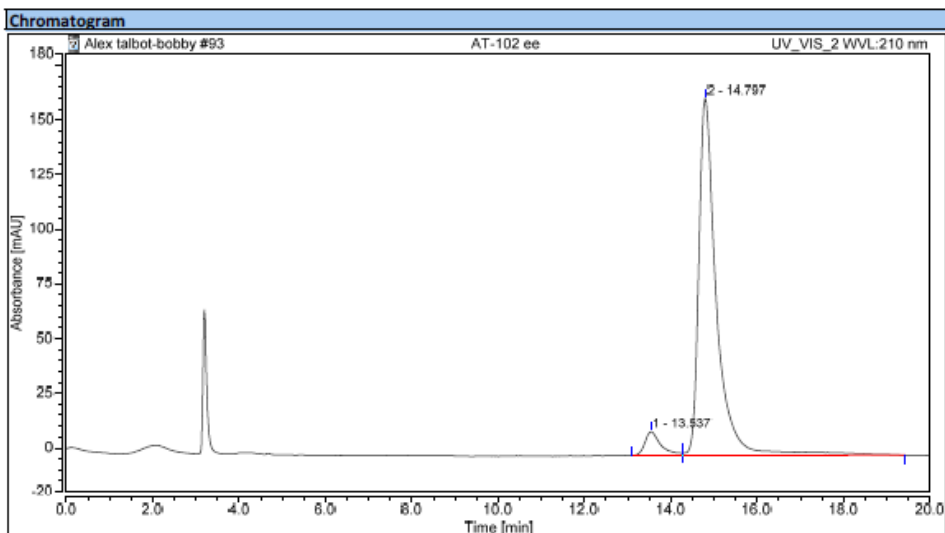

| Integration Results |           |                    |               |                |                 |                   |             |
|---------------------|-----------|--------------------|---------------|----------------|-----------------|-------------------|-------------|
| No.                 | Peak Name | Retention Time min | Area mAU*min  | Height mAU     | Relative Area % | Relative Height % | Amount n.a. |
| 1                   |           | 13.537             | 4.626         | 10.783         | 5.61            | 6.19              | n.a.        |
| 2                   |           | 14.797             | 77.900        | 163.314        | 94.39           | 93.81             | n.a.        |
| <b>Total:</b>       |           |                    | <b>82.526</b> | <b>174.097</b> | <b>100.00</b>   | <b>100.00</b>     |             |

**Compound 27** : methyl (1*S*,2*R*)-2-(((benzyloxy)carbonyl)amino)-1-(4-bromophenyl)-2-(diethoxy phosphoryl)cyclopropane-1-carboxylate

| Injection Details    |                                                 |                         |
|----------------------|-------------------------------------------------|-------------------------|
| Injection Name:      | AT-024_rac                                      | Run Time (min): 20,00   |
| Vial Number:         | GE2                                             | Injection Volume: 20,00 |
| Injection Type:      | Unknown                                         | Channel: UV_VIS_3       |
| Comment:             | IE 250*4.6 v5µm A: heptane c:1prOH 20°C 1ml/min | Wavelength: 220         |
| Instrument Method:   | 70A-30C                                         | Bandwidth: 4            |
| Processing Method:   | methode traitement                              | Dilution Factor: 1,0000 |
| Injection Date/Time: | 22/déc.23 10:35                                 | Sample Weight: 1,0000   |

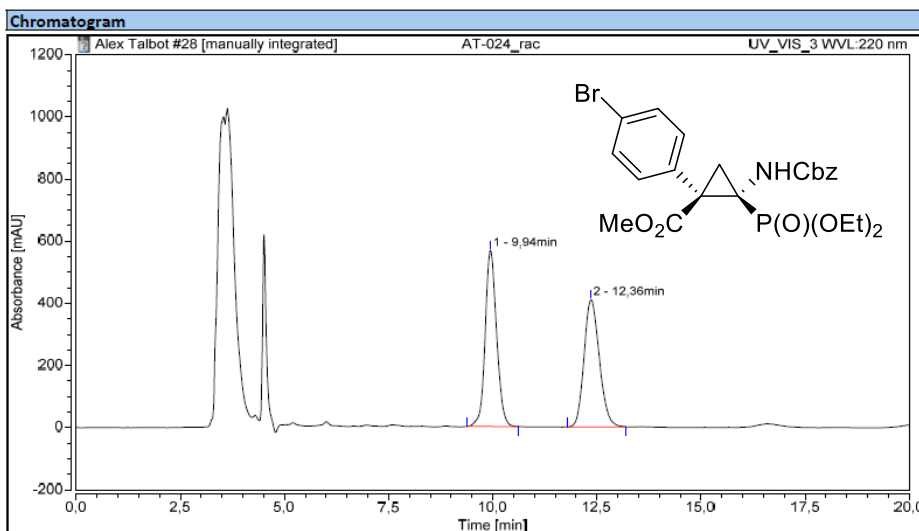

**Integration Results**

| No.    | Peak Name | Retention Time<br>min | Area<br>mAU*min | Height<br>mAU | Relative Area<br>% | Relative Height<br>% |
|--------|-----------|-----------------------|-----------------|---------------|--------------------|----------------------|
| 1      |           | 9,94                  | 179,611         | 567,446       | 50,72              | 58,07                |
| 2      |           | 12,36                 | 174,486         | 409,813       | 49,28              | 41,93                |
| Total: |           |                       | 354,097         | 977,259       | 100,00             | 100,00               |

| Injection Details    |                                                 |                         |
|----------------------|-------------------------------------------------|-------------------------|
| Injection Name:      | AT-020_ee                                       | Run Time (min): 20,00   |
| Vial Number:         | GE3                                             | Injection Volume: 20,00 |
| Injection Type:      | Unknown                                         | Channel: UV_VIS_3       |
| Comment:             | IE 250*4.6 v5µm A: heptane c:1prOH 20°C 1ml/min | Wavelength: 220         |
| Instrument Method:   | 70A-30C                                         | Bandwidth: 4            |
| Processing Method:   | methode traitement                              | Dilution Factor: 1,0000 |
| Injection Date/Time: | 22/déc.23 10:57                                 | Sample Weight: 1,0000   |

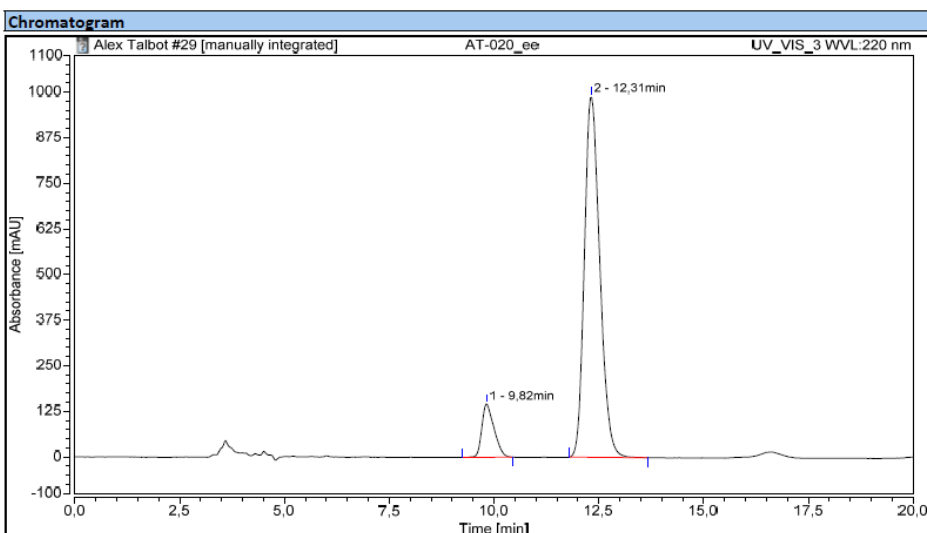

**Integration Results**

| No.    | Peak Name | Retention Time<br>min | Area<br>mAU*min | Height<br>mAU | Relative Area<br>% | Relative Height<br>% |
|--------|-----------|-----------------------|-----------------|---------------|--------------------|----------------------|
| 1      |           | 9,82                  | 49,357          | 146,822       | 10,46              | 12,92                |
| 2      |           | 12,31                 | 422,660         | 989,930       | 89,54              | 87,08                |
| Total: |           |                       | 472,018         | 1136,753      | 100,00             | 100,00               |

**Compound 28**: ethyl (1S,2R)-2-(((benzyloxy)carbonyl)amino)-1-(4-bromophenyl)-2-(diethoxyphosphoryl)cyclopropane-1-carboxylate

| Injection Details    |                                                 |                         |
|----------------------|-------------------------------------------------|-------------------------|
| Injection Name:      | AT-023_rac                                      | Run Time (min): 30,00   |
| Vial Number:         | GE1                                             | Injection Volume: 10,00 |
| Injection Type:      | Unknown                                         | Channel: UV_VIS_3       |
| Comment:             | ID 250*4.6 v5µm A: heptane c:lprOH 20°C 1ml/min | Wavelength: 220         |
| Instrument Method:   | 80A-20C                                         | Bandwidth: 4            |
| Processing Method:   | methode traitement                              | Dilution Factor: 1,0000 |
| Injection Date/Time: | 22/déc./23 12:41                                | Sample Weight: 1,0000   |

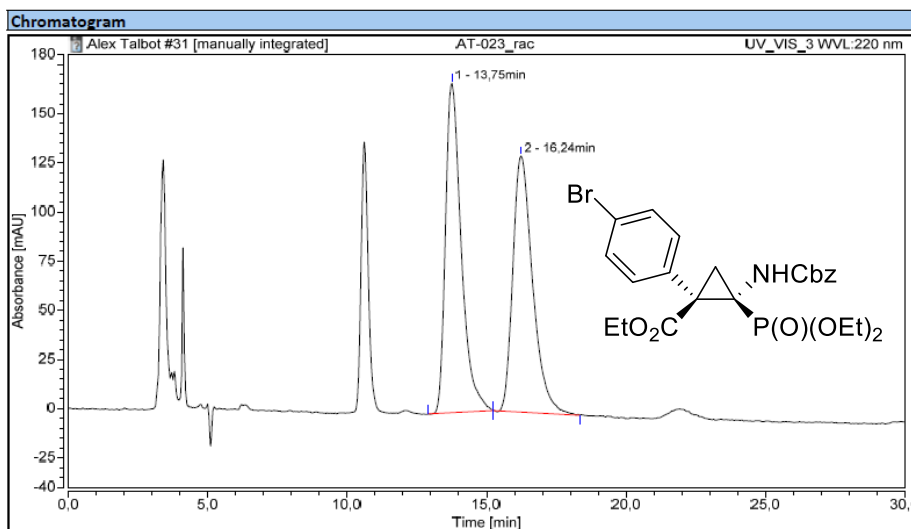

**Integration Results**

| No.    | Peak Name | Retention Time<br>min | Area<br>mAU*min | Height<br>mAU | Relative Area<br>% | Relative Height<br>% |
|--------|-----------|-----------------------|-----------------|---------------|--------------------|----------------------|
| 1      |           | 13,75                 | 109,727         | 167,500       | 50,64              | 56,25                |
| 2      |           | 16,24                 | 106,955         | 130,296       | 49,36              | 43,75                |
| Total: |           |                       | 216,682         | 297,797       | 100,00             | 100,00               |

| Injection Details    |                                                 |                         |
|----------------------|-------------------------------------------------|-------------------------|
| Injection Name:      | AT-018_ee                                       | Run Time (min): 30,00   |
| Vial Number:         | GE4                                             | Injection Volume: 10,00 |
| Injection Type:      | Unknown                                         | Channel: UV_VIS_3       |
| Comment:             | ID 250*4.6 v5µm A: heptane c:lprOH 20°C 1ml/min | Wavelength: 220         |
| Instrument Method:   | 80A-20C                                         | Bandwidth: 4            |
| Processing Method:   | methode traitement                              | Dilution Factor: 1,0000 |
| Injection Date/Time: | 22/déc./23 13:12                                | Sample Weight: 1,0000   |

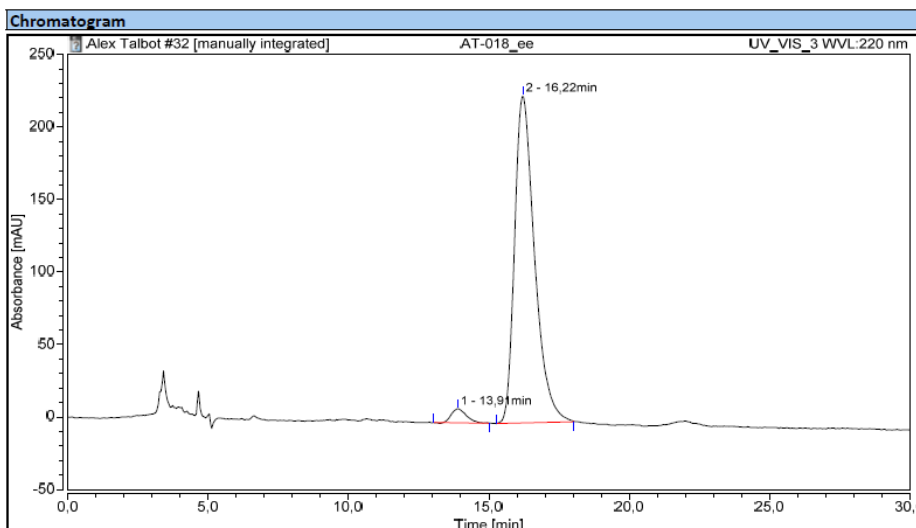

**Integration Results**

| No.    | Peak Name | Retention Time<br>min | Area<br>mAU*min | Height<br>mAU | Relative Area<br>% | Relative Height<br>% |
|--------|-----------|-----------------------|-----------------|---------------|--------------------|----------------------|
| 1      |           | 13,91                 | 5,882           | 9,655         | 3,06               | 4,10                 |
| 2      |           | 16,22                 | 186,471         | 225,584       | 96,94              | 95,90                |
| Total: |           |                       | 192,353         | 235,239       | 100,00             | 100,00               |

**Compound 29** : methyl (1*S*,2*R*)-2-(((benzyloxy)carbonyl)amino)-2-(diethoxyphosphoryl)-1-(4-iodophenyl)cyclopropane-1-carboxylate

| Injection Details    |                                                |                   |          |
|----------------------|------------------------------------------------|-------------------|----------|
| Injection Name:      | AT-079_rac                                     | Run Time (min):   | 20.00    |
| Vial Number:         | BE3                                            | Injection Volume: | 15.00    |
| Injection Type:      | Unknown                                        | Channel:          | UV_VIS_2 |
| Comment:             | IB 250*4.6 v5µm A: heptane B:EtOH 20°C 1ml/min | Wavelength:       | 210      |
| Instrument Method:   | 95A-5B 20                                      | Bandwidth:        | 2        |
| Processing Method:   | methode traitement                             | Dilution Factor:  | 1.0000   |
| Injection Date/Time: | 02/fevr./24 09:28                              | Sample Weight:    | 1.0000   |

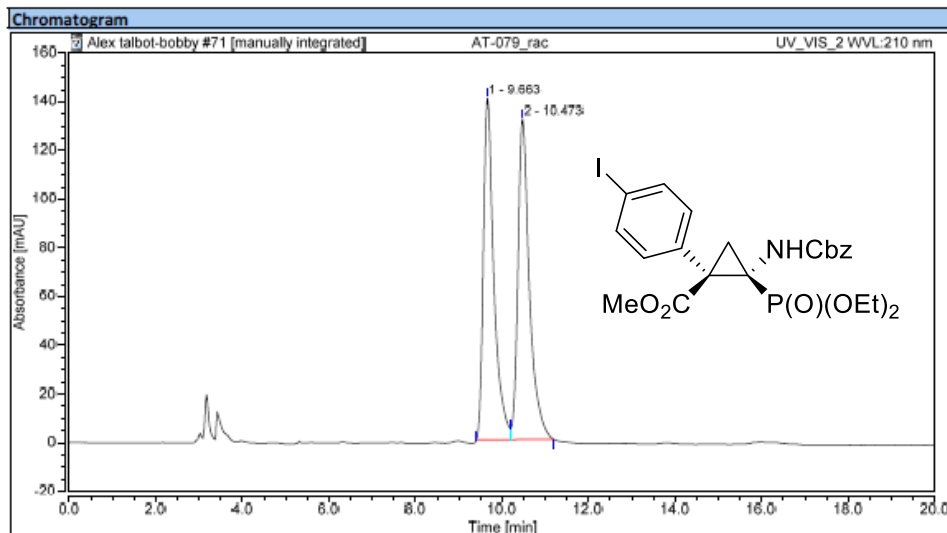

**Integration Results**

| No.           | Peak Name | Retention Time min | Area mAU*min  | Height mAU     | Relative Area % | Relative Height % | Amount n.a. |
|---------------|-----------|--------------------|---------------|----------------|-----------------|-------------------|-------------|
| 1             |           | 9.663              | 39.201        | 140.311        | 49.24           | 51.56             | n.a.        |
| 2             |           | 10.473             | 40.413        | 131.802        | 50.76           | 48.44             | n.a.        |
| <b>Total:</b> |           |                    | <b>79.614</b> | <b>272.113</b> | <b>100.00</b>   | <b>100.00</b>     |             |

| Injection Details    |                                                |                   |          |
|----------------------|------------------------------------------------|-------------------|----------|
| Injection Name:      | AT-080_ee                                      | Run Time (min):   | 20.00    |
| Vial Number:         | BE5                                            | Injection Volume: | 15.00    |
| Injection Type:      | Unknown                                        | Channel:          | UV_VIS_2 |
| Comment:             | IB 250*4.6 v5µm A: heptane B:EtOH 20°C 1ml/min | Wavelength:       | 210      |
| Instrument Method:   | 95A-5B 20                                      | Bandwidth:        | 2        |
| Processing Method:   | methode traitement                             | Dilution Factor:  | 1.0000   |
| Injection Date/Time: | 02/fevr./24 10:18                              | Sample Weight:    | 1.0000   |

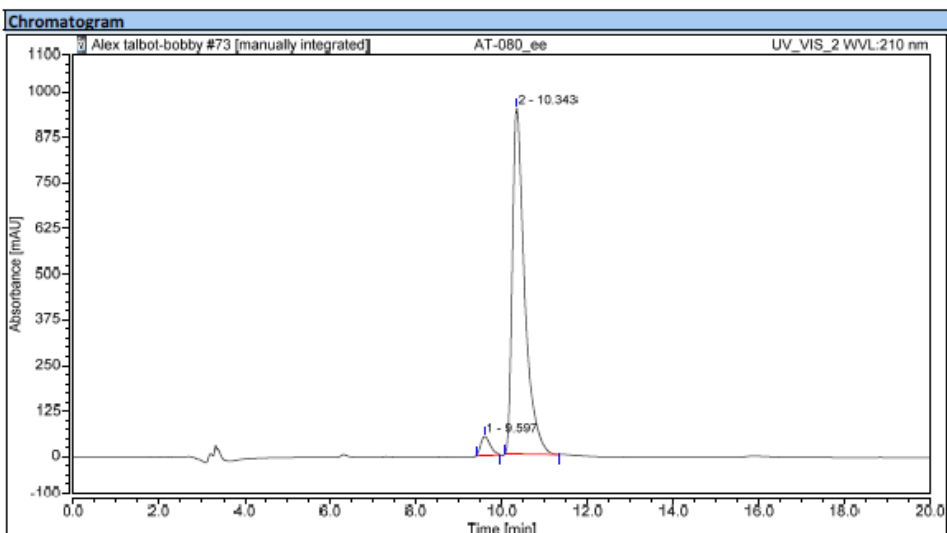

**Integration Results**

| No.           | Peak Name | Retention Time min | Area mAU*min   | Height mAU      | Relative Area % | Relative Height % | Amount n.a. |
|---------------|-----------|--------------------|----------------|-----------------|-----------------|-------------------|-------------|
| 1             |           | 9.597              | 13.392         | 52.338          | 4.08            | 5.23              | n.a.        |
| 2             |           | 10.343             | 314.515        | 947.854         | 95.92           | 94.77             | n.a.        |
| <b>Total:</b> |           |                    | <b>327.907</b> | <b>1000.192</b> | <b>100.00</b>   | <b>100.00</b>     |             |

**Compound 30** : methyl (1*S*,2*R*)-2-(((benzyloxy)carbonyl)amino)-2-(diethoxyphosphoryl)-1-(4-(trifluoromethyl)phenyl)cyclopropane-1-carboxylate

| Injection Details    |                                                |                         |
|----------------------|------------------------------------------------|-------------------------|
| Injection Name:      | AT-146 rac                                     | Run Time (min): 30.00   |
| Vial Number:         | BD7                                            | Injection Volume: 15.00 |
| Injection Type:      | Unknown                                        | Channel: UV_VIS_2       |
| Comment:             | IB 250*4.6 v5µm A: heptane B:EtOH 20°C 1ml/min | Wavelength: 210         |
| Instrument Method:   | 98A-2B 20C-30min                               | Bandwidth: 2            |
| Processing Method:   | methode traitement                             | Dilution Factor: 1.0000 |
| Injection Date/Time: | 23/avr/24 17:01                                | Sample Weight: 1.0000   |

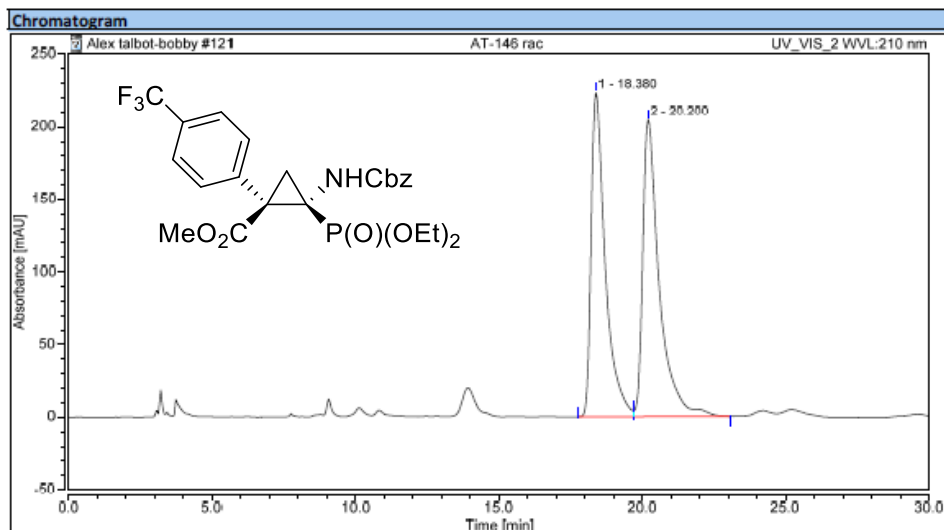

| Integration Results |           |                    |                |                |                 |                   |             |
|---------------------|-----------|--------------------|----------------|----------------|-----------------|-------------------|-------------|
| No.                 | Peak Name | Retention Time min | Area mAU*min   | Height mAU     | Relative Area % | Relative Height % | Amount n.a. |
| 1                   |           | 18.380             | 127.413        | 223.419        | 48.30           | 52.15             | n.a.        |
| 2                   |           | 20.200             | 136.396        | 205.021        | 51.70           | 47.85             | n.a.        |
| <b>Total:</b>       |           |                    | <b>263.809</b> | <b>428.440</b> | <b>100.00</b>   | <b>100.00</b>     |             |

| Injection Details    |                                                |                         |
|----------------------|------------------------------------------------|-------------------------|
| Injection Name:      | AT-062 ee                                      | Run Time (min): 28.26   |
| Vial Number:         | BD5                                            | Injection Volume: 15.00 |
| Injection Type:      | Unknown                                        | Channel: UV_VIS_2       |
| Comment:             | IB 250*4.6 v5µm A: heptane C:EtOH 20°C 1ml/min | Wavelength: 210         |
| Instrument Method:   | 98A-2B 20C-30min                               | Bandwidth: 2            |
| Processing Method:   | methode traitement                             | Dilution Factor: 1.0000 |
| Injection Date/Time: | 30/janv./24 16:06                              | Sample Weight: 1.0000   |

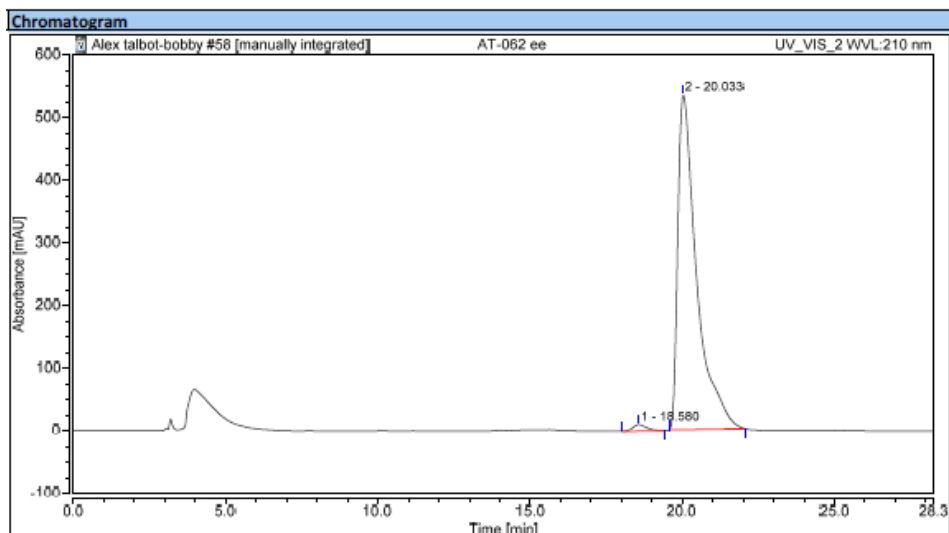

| Integration Results |           |                    |                |                |                 |                   |             |
|---------------------|-----------|--------------------|----------------|----------------|-----------------|-------------------|-------------|
| No.                 | Peak Name | Retention Time min | Area mAU*min   | Height mAU     | Relative Area % | Relative Height % | Amount n.a. |
| 1                   |           | 18.580             | 5.645          | 10.377         | 1.45            | 1.90              | n.a.        |
| 2                   |           | 20.033             | 383.217        | 534.818        | 98.55           | 98.10             | n.a.        |
| <b>Total:</b>       |           |                    | <b>388.862</b> | <b>545.195</b> | <b>100.00</b>   | <b>100.00</b>     |             |



**Compound 31** : ethyl (1S,2R)-2-(((benzyloxy)carbonyl)amino)-2-(diethoxyphosphoryl)-1-(4-(trifluoromethyl)phenyl)cyclopropane-1-carboxylate

| Injection Details    |                                                |                         |
|----------------------|------------------------------------------------|-------------------------|
| Injection Name:      | AT-063_rac                                     | Run Time (min): 20.00   |
| Vial Number:         | BE6                                            | Injection Volume: 15.00 |
| Injection Type:      | Unknown                                        | Channel: UV_VIS_2       |
| Comment:             | IA 250*4.6 v5µm A: heptane C:EtOH 20°C 1ml/min | Wavelength: 210         |
| Instrument Method:   | 95A-5B 20                                      | Bandwidth: 2            |
| Processing Method:   | methode traitement                             | Dilution Factor: 1.0000 |
| Injection Date/Time: | 30 janv ./24 11:17                             | Sample Weight: 1.0000   |

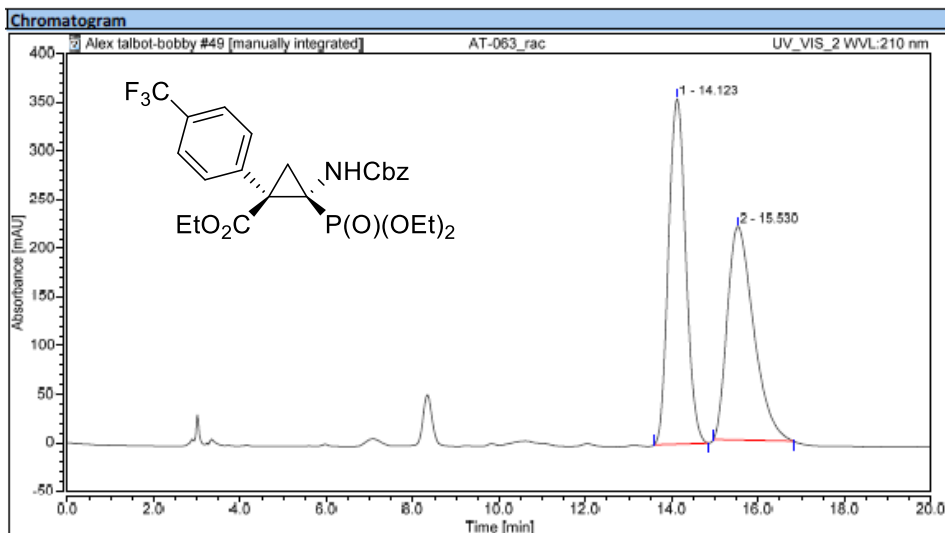

| No.           | Peak Name | Retention Time min | Area mAU*min   | Height mAU     | Relative Area % | Relative Height % | Amount n.a. |
|---------------|-----------|--------------------|----------------|----------------|-----------------|-------------------|-------------|
| 1             |           | 14.123             | 164.214        | 355.384        | 51.35           | 61.78             | n.a.        |
| 2             |           | 15.530             | 155.561        | 219.822        | 48.65           | 38.22             | n.a.        |
| <b>Total:</b> |           |                    | <b>319.776</b> | <b>575.206</b> | <b>100.00</b>   | <b>100.00</b>     |             |

| Injection Details    |                                                |                         |
|----------------------|------------------------------------------------|-------------------------|
| Injection Name:      | AT-064 ee                                      | Run Time (min): 20.00   |
| Vial Number:         | BD6                                            | Injection Volume: 15.00 |
| Injection Type:      | Unknown                                        | Channel: UV_VIS_2       |
| Comment:             | IA 250*4.6 v5µm A: heptane C:EtOH 20°C 1ml/min | Wavelength: 210         |
| Instrument Method:   | 95A-5B 20                                      | Bandwidth: 2            |
| Processing Method:   | methode traitement                             | Dilution Factor: 1.0000 |
| Injection Date/Time: | 30 janv ./24 11:39                             | Sample Weight: 1.0000   |

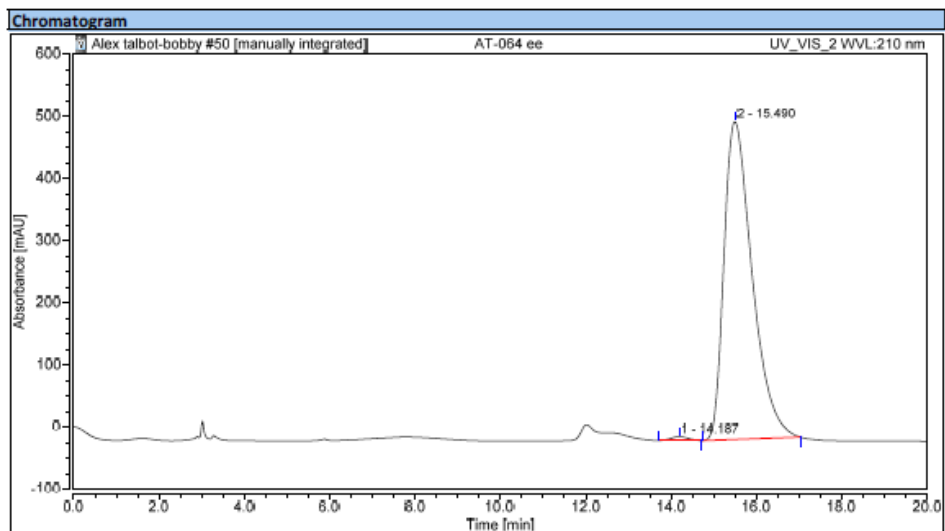

| No.           | Peak Name | Retention Time min | Area mAU*min   | Height mAU     | Relative Area % | Relative Height % | Amount n.a. |
|---------------|-----------|--------------------|----------------|----------------|-----------------|-------------------|-------------|
| 1             |           | 14.187             | 3.033          | 6.182          | 0.77            | 1.19              | n.a.        |
| 2             |           | 15.490             | 390.858        | 511.754        | 99.23           | 98.81             | n.a.        |
| <b>Total:</b> |           |                    | <b>393.891</b> | <b>517.936</b> | <b>100.00</b>   | <b>100.00</b>     |             |

**Compound 32**: methyl (1*S*,2*R*)-2-(((benzyloxy)carbonyl)amino)-2-(diethoxyphosphoryl)-1-(*m*-tolyl)cyclopropane-1-carboxylate

| Injection Details    |                                                |                         |
|----------------------|------------------------------------------------|-------------------------|
| Injection Name:      | AT-081_rac                                     | Run Time (min): 20.00   |
| Vial Number:         | BE4                                            | Injection Volume: 15.00 |
| Injection Type:      | Unknown                                        | Channel: UV_VIS_2       |
| Comment:             | IB 250*4.6 v5µm A: heptane B:EtOH 20°C 1ml/min | Wavelength: 210         |
| Instrument Method:   | 95A-5B 20                                      | Bandwidth: 2            |
| Processing Method:   | methode traitement                             | Dilution Factor: 1.0000 |
| Injection Date/Time: | 02/fevr./24 09:50                              | Sample Weight: 1.0000   |

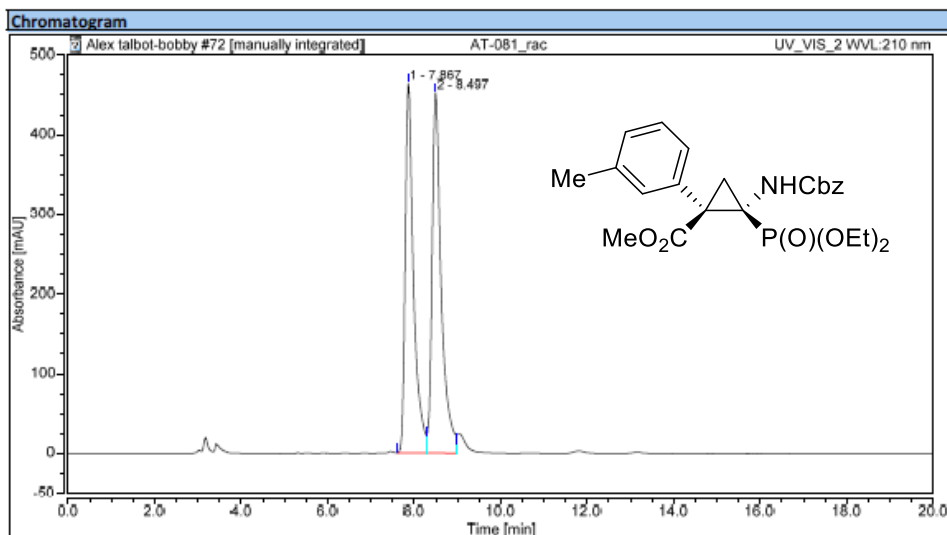

| Integration Results |           |                    |                |                |                 |                   |             |
|---------------------|-----------|--------------------|----------------|----------------|-----------------|-------------------|-------------|
| No.                 | Peak Name | Retention Time min | Area mAU*min   | Height mAU     | Relative Area % | Relative Height % | Amount n.a. |
| 1                   |           | 7.867              | 103.204        | 464.007        | 48.18           | 50.62             | n.a.        |
| 2                   |           | 8.497              | 110.985        | 452.560        | 51.82           | 49.38             | n.a.        |
| <b>Total:</b>       |           |                    | <b>214.189</b> | <b>916.567</b> | <b>100.00</b>   | <b>100.00</b>     |             |

| Injection Details    |                                                |                         |
|----------------------|------------------------------------------------|-------------------------|
| Injection Name:      | AT-082_ee                                      | Run Time (min): 20.00   |
| Vial Number:         | BE7                                            | Injection Volume: 15.00 |
| Injection Type:      | Unknown                                        | Channel: UV_VIS_2       |
| Comment:             | IB 250*4.6 v5µm A: heptane B:EtOH 20°C 1ml/min | Wavelength: 210         |
| Instrument Method:   | 95A-5B 20                                      | Bandwidth: 2            |
| Processing Method:   | methode traitement                             | Dilution Factor: 1.0000 |
| Injection Date/Time: | 02/fevr./24 11:02                              | Sample Weight: 1.0000   |

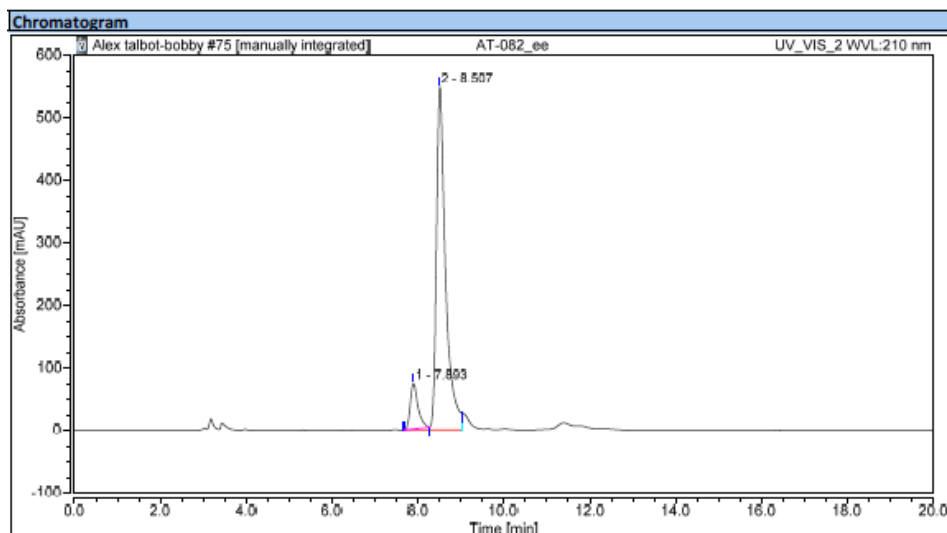

| Integration Results |           |                    |                |                |                 |                   |             |
|---------------------|-----------|--------------------|----------------|----------------|-----------------|-------------------|-------------|
| No.                 | Peak Name | Retention Time min | Area mAU*min   | Height mAU     | Relative Area % | Relative Height % | Amount n.a. |
| 1                   |           | 7.893              | 15.143         | 73.571         | 10.00           | 11.79             | n.a.        |
| 2                   |           | 8.507              | 136.286        | 550.482        | 90.00           | 88.21             | n.a.        |
| <b>Total:</b>       |           |                    | <b>151.429</b> | <b>624.053</b> | <b>100.00</b>   | <b>100.00</b>     |             |

**Compound 33**: ethyl (1S,2R)-2-(((benzyloxy)carbonyl)amino)-2-(diethoxyphosphoryl)-1-(3-methoxyphenyl)cyclopropane-1-carboxylate

| Injection Details    |                                                |                         |
|----------------------|------------------------------------------------|-------------------------|
| Injection Name:      | AT-083_rac                                     | Run Time (min): 20.00   |
| Vial Number:         | BE1                                            | Injection Volume: 15.00 |
| Injection Type:      | Unknown                                        | Channel: UV_VIS_2       |
| Comment:             | IB 250*4.6 v5µm A: heptane B:EtOH 20°C 1ml/min | Wavelength: 210         |
| Instrument Method:   | 97A-3B 20                                      | Bandwidth: 2            |
| Processing Method:   | methode traitement                             | Dilution Factor: 1.0000 |
| Injection Date/Time: | 16/fevr./24 09:59                              | Sample Weight: 1.0000   |

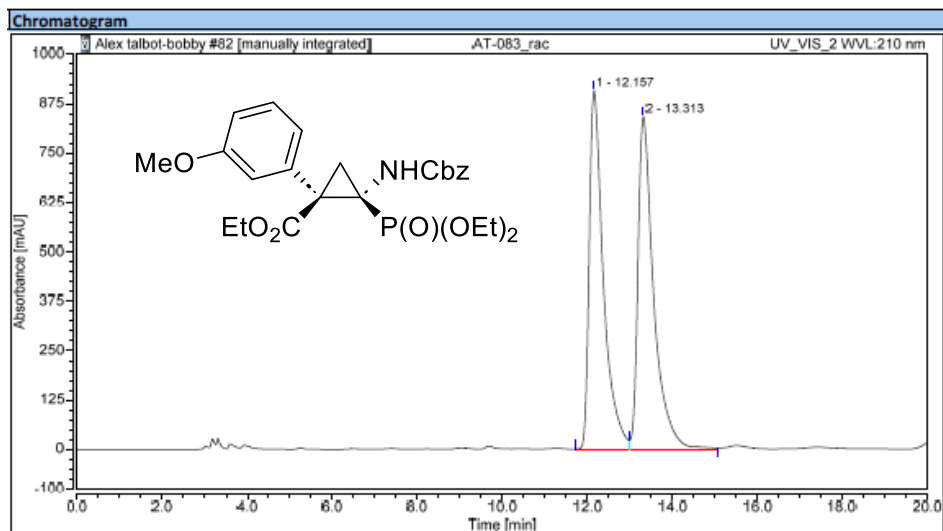

| Integration Results |           |                    |                |                 |                 |                   |             |
|---------------------|-----------|--------------------|----------------|-----------------|-----------------|-------------------|-------------|
| No.                 | Peak Name | Retention Time min | Area mAU*min   | Height mAU      | Relative Area % | Relative Height % | Amount n.a. |
| 1                   |           | 12.157             | 348.444        | 907.635         | 49.24           | 51.90             | n.a.        |
| 2                   |           | 13.313             | 359.197        | 841.324         | 50.76           | 48.10             | n.a.        |
| <b>Total:</b>       |           |                    | <b>707.641</b> | <b>1748.960</b> | <b>100.00</b>   | <b>100.00</b>     |             |

| Injection Details    |                                                |                         |
|----------------------|------------------------------------------------|-------------------------|
| Injection Name:      | AT-087 ee                                      | Run Time (min): 20.00   |
| Vial Number:         | BE4                                            | Injection Volume: 15.00 |
| Injection Type:      | Unknown                                        | Channel: UV_VIS_2       |
| Comment:             | IB 250*4.6 v5µm A: heptane B:EtOH 20°C 1ml/min | Wavelength: 210         |
| Instrument Method:   | 97A-3B 20                                      | Bandwidth: 2            |
| Processing Method:   | methode traitement                             | Dilution Factor: 1.0000 |
| Injection Date/Time: | 16/fevr./24 11:03                              | Sample Weight: 1.0000   |

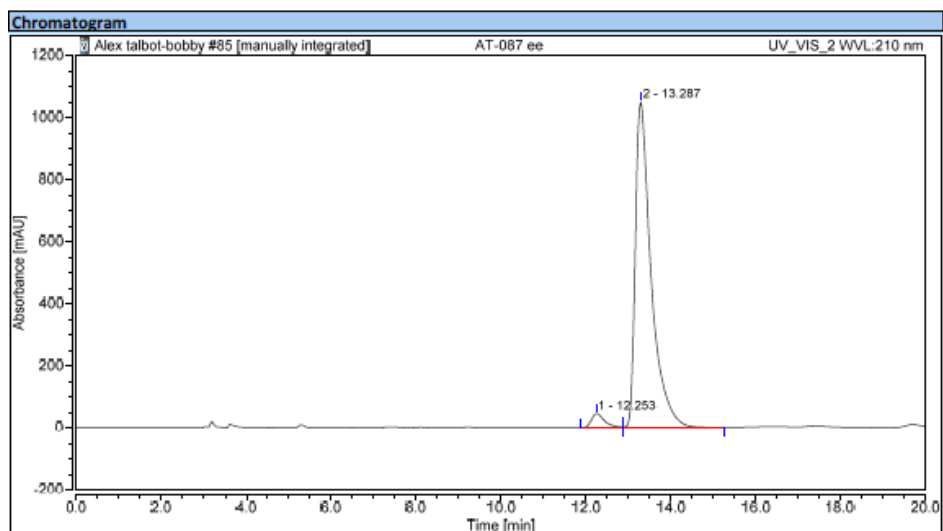

| Integration Results |           |                    |                |                 |                 |                   |             |
|---------------------|-----------|--------------------|----------------|-----------------|-----------------|-------------------|-------------|
| No.                 | Peak Name | Retention Time min | Area mAU*min   | Height mAU      | Relative Area % | Relative Height % | Amount n.a. |
| 1                   |           | 12.253             | 16.614         | 46.184          | 3.55            | 4.21              | n.a.        |
| 2                   |           | 13.287             | 451.086        | 1050.477        | 96.45           | 95.79             | n.a.        |
| <b>Total:</b>       |           |                    | <b>467.700</b> | <b>1096.660</b> | <b>100.00</b>   | <b>100.00</b>     |             |

**Compound 34** : methyl (1*S*,2*R*)-2-(((benzyloxy)carbonyl)amino)-2-(diethoxyphosphoryl)-1-(3-(trifluoromethyl)phenyl)cyclopropane-1-carboxylate

| Injection Details    |                                                |                         |
|----------------------|------------------------------------------------|-------------------------|
| Injection Name:      | AT-077_rac                                     | Run Time (min): 20.00   |
| Vial Number:         | BE2                                            | Injection Volume: 15.00 |
| Injection Type:      | Unknown                                        | Channel: UV_VIS_2       |
| Comment:             | IB 250*4.6 v5µm A: heptane B:EtOH 20°C 1ml/min | Wavelength: 210         |
| Instrument Method:   | 95A-5B 20                                      | Bandwidth: 2            |
| Processing Method:   | methode traitement                             | Dilution Factor: 1.0000 |
| Injection Date/Time: | 02/fevr./24 09:07                              | Sample Weight: 1.0000   |

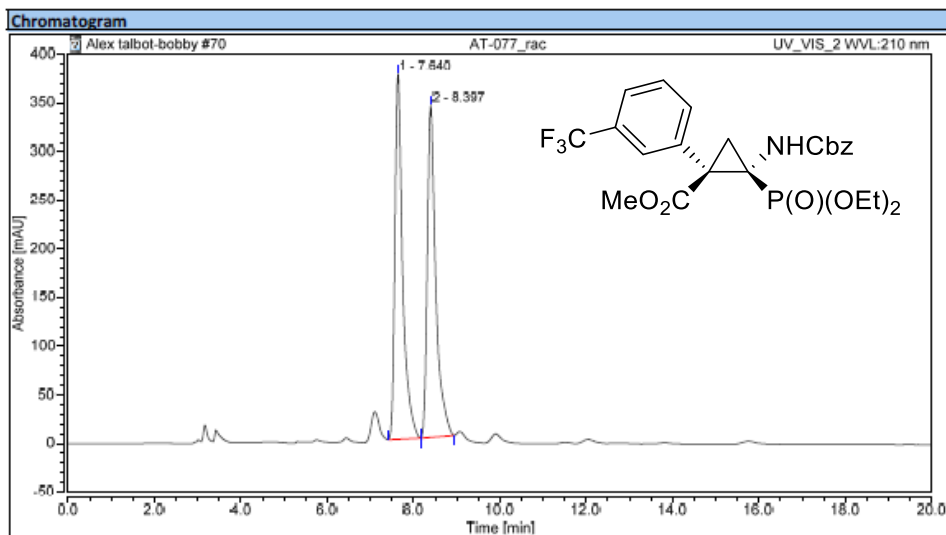

| Integration Results |           |                    |                |                |                 |                   |        |
|---------------------|-----------|--------------------|----------------|----------------|-----------------|-------------------|--------|
| No.                 | Peak Name | Retention Time min | Area mAU*min   | Height mAU     | Relative Area % | Relative Height % | Amount |
| 1                   |           | 7.640              | 78.256         | 376.034        | 50.20           | 52.37             | n.a.   |
| 2                   |           | 8.397              | 77.636         | 342.018        | 49.80           | 47.63             | n.a.   |
| <b>Total:</b>       |           |                    | <b>155.892</b> | <b>718.052</b> | <b>100.00</b>   | <b>100.00</b>     |        |

| Injection Details    |                                                |                         |
|----------------------|------------------------------------------------|-------------------------|
| Injection Name:      | AT-078 ee                                      | Run Time (min): 20.00   |
| Vial Number:         | BE8                                            | Injection Volume: 15.00 |
| Injection Type:      | Unknown                                        | Channel: UV_VIS_2       |
| Comment:             | IB 250*4.6 v5µm A: heptane B:EtOH 20°C 1ml/min | Wavelength: 210         |
| Instrument Method:   | 95A-5B 20                                      | Bandwidth: 2            |
| Processing Method:   | methode traitement                             | Dilution Factor: 1.0000 |
| Injection Date/Time: | 02/fevr./24 11:57                              | Sample Weight: 1.0000   |

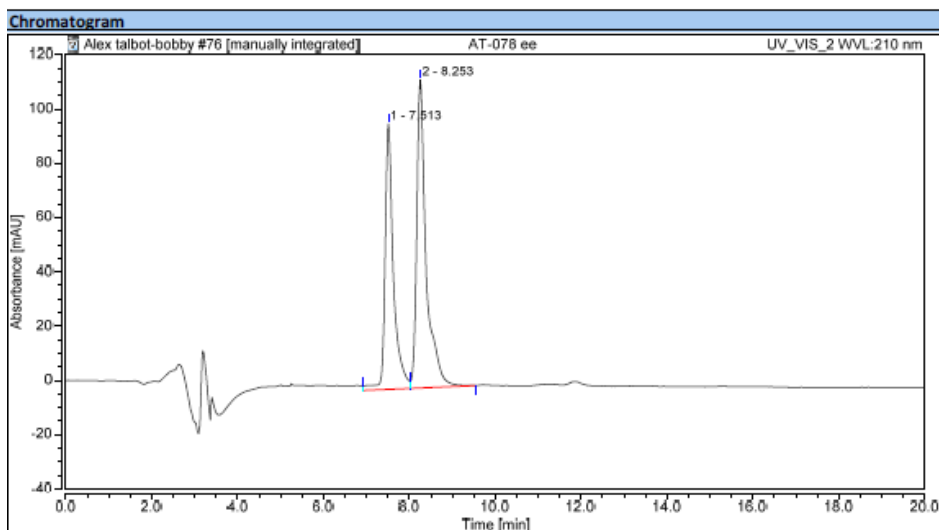

| Integration Results |           |                    |               |                |                 |                   |        |
|---------------------|-----------|--------------------|---------------|----------------|-----------------|-------------------|--------|
| No.                 | Peak Name | Retention Time min | Area mAU*min  | Height mAU     | Relative Area % | Relative Height % | Amount |
| 1                   |           | 7.513              | 22.031        | 97.794         | 43.34           | 46.29             | n.a.   |
| 2                   |           | 8.253              | 28.799        | 113.492        | 56.66           | 53.71             | n.a.   |
| <b>Total:</b>       |           |                    | <b>50.830</b> | <b>211.285</b> | <b>100.00</b>   | <b>100.00</b>     |        |

**Compound 35**: ethyl (1*S*,2*R*)-2-(((benzyloxy)carbonyl)amino)-1-(3,4-dichlorophenyl)-2-(diethoxyphosphoryl)cyclopropane-1-carboxylate

| Injection Details    |                                                |                   |          |
|----------------------|------------------------------------------------|-------------------|----------|
| Injection Name:      | AT-086_rac                                     | Run Time (min):   | 20.00    |
| Vial Number:         | BE3                                            | Injection Volume: | 15.00    |
| Injection Type:      | Unknown                                        | Channel:          | UV_VIS_2 |
| Comment:             | IB 250*4.6 v5µm A: heptane B:EtOH 20°C 1ml/min | Wavelength:       | 210      |
| Instrument Method:   | 97A-3B 20                                      | Bandwidth:        | 2        |
| Processing Method:   | methode traitement                             | Dilution Factor:  | 1.0000   |
| Injection Date/Time: | 16/fevr./24 10:42                              | Sample Weight:    | 1.0000   |

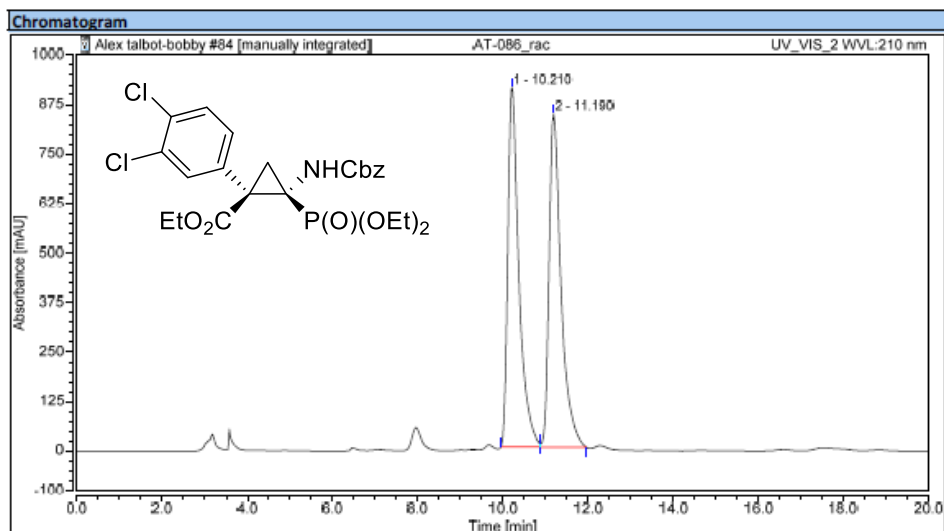

| Integration Results |           |                    |                |                 |                 |                   |             |
|---------------------|-----------|--------------------|----------------|-----------------|-----------------|-------------------|-------------|
| No.                 | Peak Name | Retention Time min | Area mAU*min   | Height mAU      | Relative Area % | Relative Height % | Amount n.a. |
| 1                   |           | 10.210             | 273.590        | 907.890         | 50.02           | 51.89             | n.a.        |
| 2                   |           | 11.190             | 273.403        | 841.702         | 49.98           | 48.11             | n.a.        |
| <b>Total:</b>       |           |                    | <b>546.994</b> | <b>1749.592</b> | <b>100.00</b>   | <b>100.00</b>     |             |

| Injection Details    |                                                |                   |          |
|----------------------|------------------------------------------------|-------------------|----------|
| Injection Name:      | AT-089 ee                                      | Run Time (min):   | 20.00    |
| Vial Number:         | BE6                                            | Injection Volume: | 15.00    |
| Injection Type:      | Unknown                                        | Channel:          | UV_VIS_2 |
| Comment:             | IB 250*4.6 v5µm A: heptane B:EtOH 20°C 1ml/min | Wavelength:       | 210      |
| Instrument Method:   | 97A-3B 20                                      | Bandwidth:        | 2        |
| Processing Method:   | methode traitement                             | Dilution Factor:  | 1.0000   |
| Injection Date/Time: | 16/fevr./24 11:46                              | Sample Weight:    | 1.0000   |

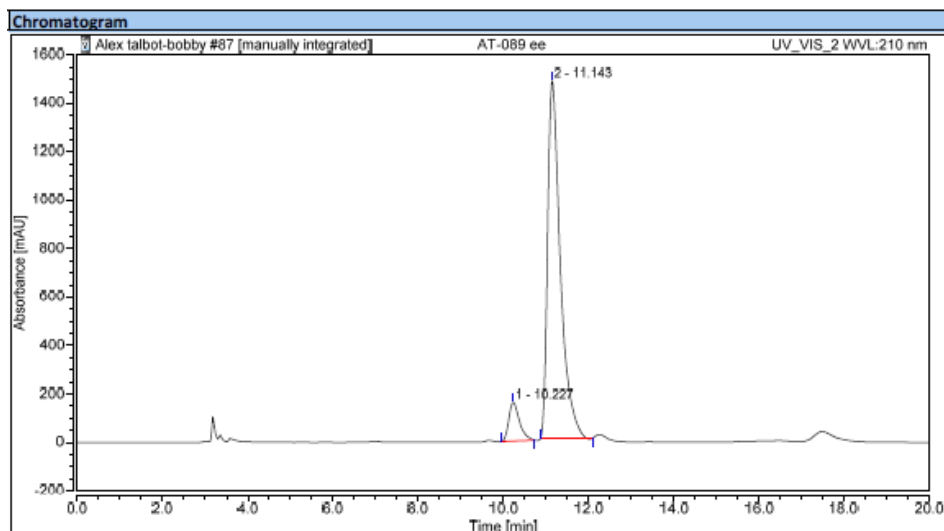

| Integration Results |           |                    |                |                 |                 |                   |             |
|---------------------|-----------|--------------------|----------------|-----------------|-----------------|-------------------|-------------|
| No.                 | Peak Name | Retention Time min | Area mAU*min   | Height mAU      | Relative Area % | Relative Height % | Amount n.a. |
| 1                   |           | 10.227             | 46.414         | 160.694         | 8.36            | 9.81              | n.a.        |
| 2                   |           | 11.143             | 508.909        | 1477.161        | 91.64           | 90.19             | n.a.        |
| <b>Total:</b>       |           |                    | <b>555.323</b> | <b>1637.856</b> | <b>100.00</b>   | <b>100.00</b>     |             |

**Compound 36**: dimethyl (1S,2S)-1-([1,1'-biphenyl]-4-yl)-2-(bis(tert-butoxycarbonyl)amino)cyclopropane-1,2-dicarboxylate

| Injection Details    |                          |                         |
|----------------------|--------------------------|-------------------------|
| Injection Name:      | HB-78-rac                | Run Time (min): 30,00   |
| Vial Number:         | GB6                      | Injection Volume: 10,00 |
| Injection Type:      | Unknown                  | Channel: UV_VIS_3       |
| Comment:             | IE_Hept:iPrOH 90/10 20°C | Wavelength: 220         |
| Instrument Method:   | 90A-10C                  | Bandwidth: 4            |
| Processing Method:   | methode traitement       | Dilution Factor: 1,0000 |
| Injection Date/Time: | 04/avr./22 11:48         | Sample Weight: 1,0000   |

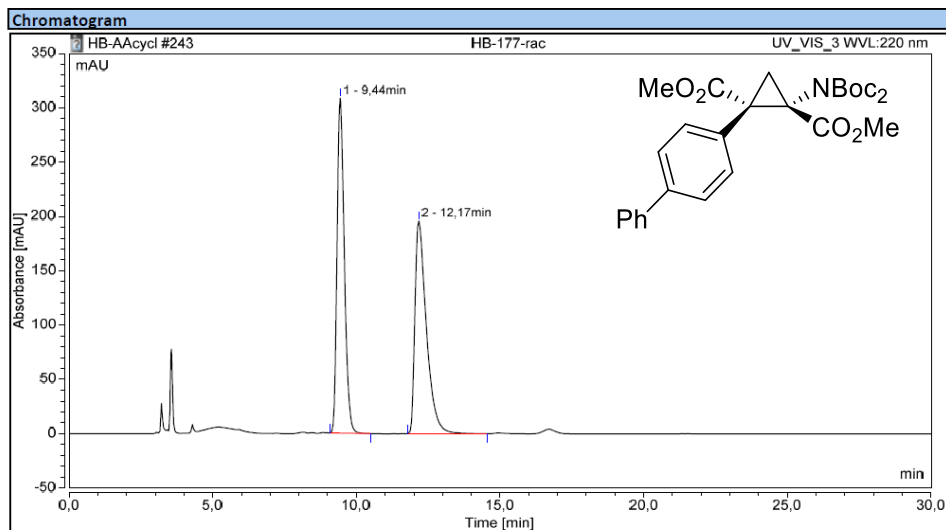

**Integration Results**

| No.           | Peak Name | Retention Time min | Area mAU*min   | Height mAU     | Relative Area % | Relative Height % |
|---------------|-----------|--------------------|----------------|----------------|-----------------|-------------------|
| 1             |           | 9,44               | 90,145         | 308,466        | 49,96           | 61,16             |
| 2             |           | 12,17              | 90,289         | 195,881        | 50,04           | 38,84             |
| <b>Total:</b> |           |                    | <b>180,434</b> | <b>504,346</b> | <b>100,00</b>   | <b>100,00</b>     |

| Injection Details    |                          |                         |
|----------------------|--------------------------|-------------------------|
| Injection Name:      | HB-78-rac                | Run Time (min): 30,00   |
| Vial Number:         | GB5                      | Injection Volume: 10,00 |
| Injection Type:      | Unknown                  | Channel: UV_VIS_3       |
| Comment:             | IE_Hept:iPrOH 90/10 20°C | Wavelength: 220         |
| Instrument Method:   | 90A-10C                  | Bandwidth: 4            |
| Processing Method:   | methode traitement       | Dilution Factor: 1,0000 |
| Injection Date/Time: | 04/avr./22 11:16         | Sample Weight: 1,0000   |

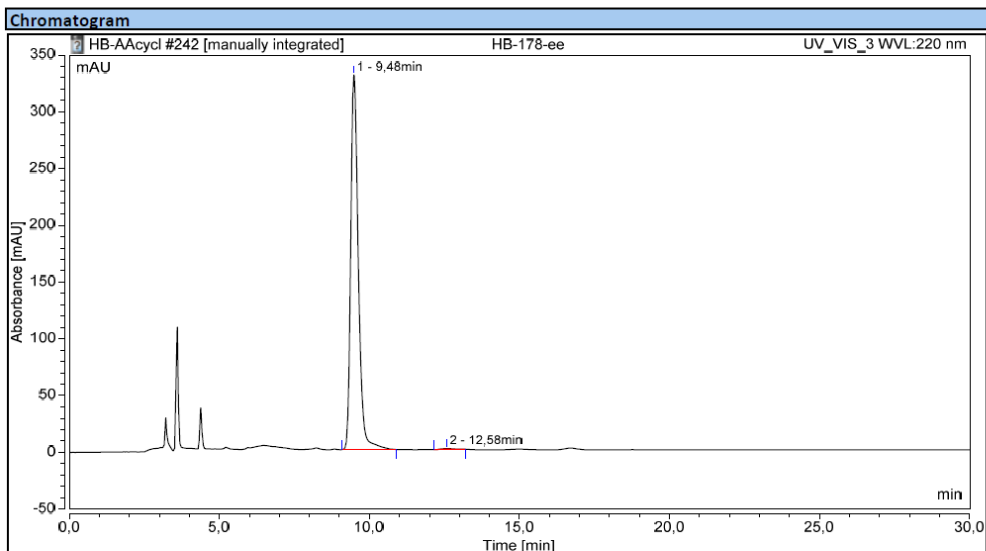

**Integration Results**

| No.           | Peak Name | Retention Time min | Area mAU*min  | Height mAU     | Relative Area % | Relative Height % |
|---------------|-----------|--------------------|---------------|----------------|-----------------|-------------------|
| 1             |           | 9,48               | 97,273        | 330,135        | 99,65           | 99,78             |
| 2             |           | 12,58              | 0,345         | 0,737          | 0,35            | 0,22              |
| <b>Total:</b> |           |                    | <b>97,618</b> | <b>330,872</b> | <b>100,00</b>   | <b>100,00</b>     |

**Compound 37**: dimethyl (1S,2S)-1-((tert-butoxycarbonyl)amino)-2-(4-iodophenyl)cyclopropane-1,2-dicarboxylate

| Injection Details    |                          |                         |
|----------------------|--------------------------|-------------------------|
| Injection Name:      | HB-78-rac                | Run Time (min): 30,00   |
| Vial Number:         | RE3                      | Injection Volume: 10,00 |
| Injection Type:      | Unknown                  | Channel: UV_VIS_3       |
| Comment:             | IC_Hept:iPrOH 80/20 20°C | Wavelength: 220         |
| Instrument Method:   | 80A-20C                  | Bandwidth: 4            |
| Processing Method:   | methode traitement       | Dilution Factor: 1,0000 |
| Injection Date/Time: | 17/juin/22 08:17         | Sample Weight: 1,0000   |

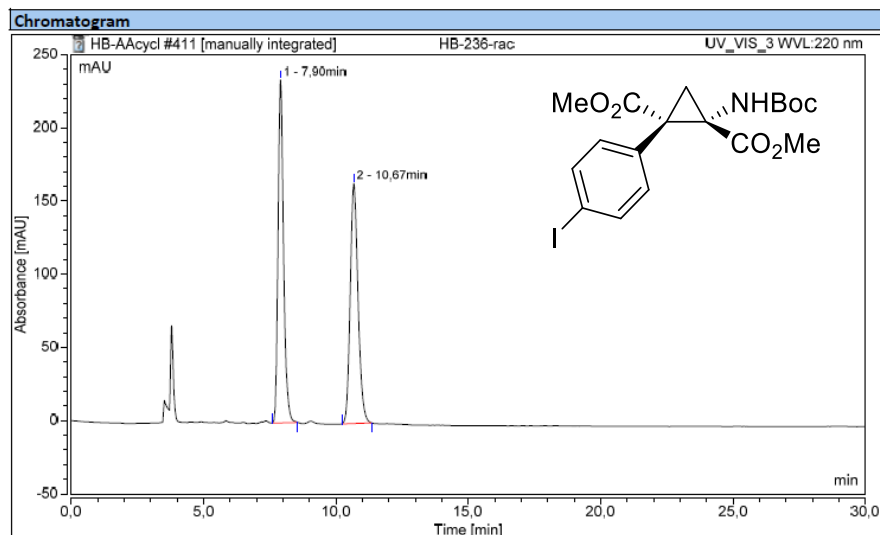

| Integration Results |           |                       |                 |               |                    |                      |                 |
|---------------------|-----------|-----------------------|-----------------|---------------|--------------------|----------------------|-----------------|
| No.                 | Peak Name | Retention Time<br>min | Area<br>mAU*min | Height<br>mAU | Relative Area<br>% | Relative Height<br>% | Resolution (EP) |
| 1                   |           | 7,90                  | 56,505          | 234,258       | 50,05              | 58,81                | 6,15            |
| 2                   |           | 10,67                 | 56,385          | 164,044       | 49,95              | 41,19                | n.a.            |
| Total:              |           |                       | 112,890         | 398,303       | 100,00             | 100,00               |                 |

| Injection Details    |                          |                         |
|----------------------|--------------------------|-------------------------|
| Injection Name:      | HB-78-rac                | Run Time (min): 30,00   |
| Vial Number:         | RE4                      | Injection Volume: 10,00 |
| Injection Type:      | Unknown                  | Channel: UV_VIS_3       |
| Comment:             | IC_Hept:iPrOH 80/20 20°C | Wavelength: 220         |
| Instrument Method:   | 80A-20C                  | Bandwidth: 4            |
| Processing Method:   | methode traitement       | Dilution Factor: 1,0000 |
| Injection Date/Time: | 17/juin/22 08:49         | Sample Weight: 1,0000   |

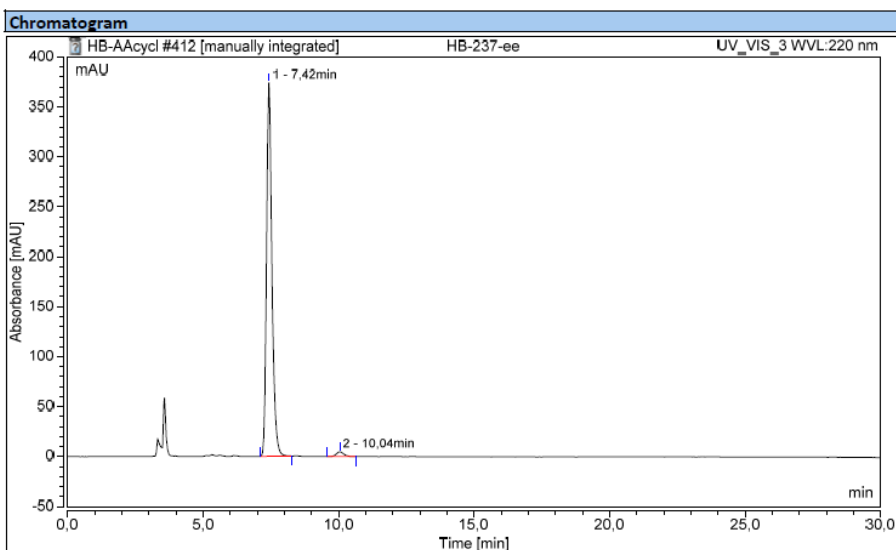

| Integration Results |           |                       |                 |               |                    |                      |                 |
|---------------------|-----------|-----------------------|-----------------|---------------|--------------------|----------------------|-----------------|
| No.                 | Peak Name | Retention Time<br>min | Area<br>mAU*min | Height<br>mAU | Relative Area<br>% | Relative Height<br>% | Resolution (EP) |
| 1                   |           | 7,42                  | 86,695          | 373,859       | 98,32              | 98,78                | 6,08            |
| 2                   |           | 10,04                 | 1,484           | 4,617         | 1,68               | 1,22                 | n.a.            |
| Total:              |           |                       | 88,179          | 378,476       | 100,00             | 100,00               |                 |

**Compound 38: ethyl (1R,2S,5S)-5-(bis(tert-butoxycarbonyl)amino)-2-(hydroxy(phenyl)methyl)-4-oxo-3-oxabicyclo[3.1.0]hexane-1-carboxylate**

| Injection Details    |                                   |                         |
|----------------------|-----------------------------------|-------------------------|
| Injection Name:      | HB-78-rac                         | Run Time (min): 30,00   |
| Vial Number:         | RA1                               | Injection Volume: 15,00 |
| Injection Type:      | Unknown                           | Channel: UV_VIS_3       |
| Comment:             | IE_Hept:PrOH 80/20 20°C 1.3ml/min | Wavelength: 220         |
| Instrument Method:   | 75A-25C                           | Bandwidth: 4            |
| Processing Method:   | methode traitement                | Dilution Factor: 1,0000 |
| Injection Date/Time: | 13/juin/22 08:52                  | Sample Weight: 1,0000   |

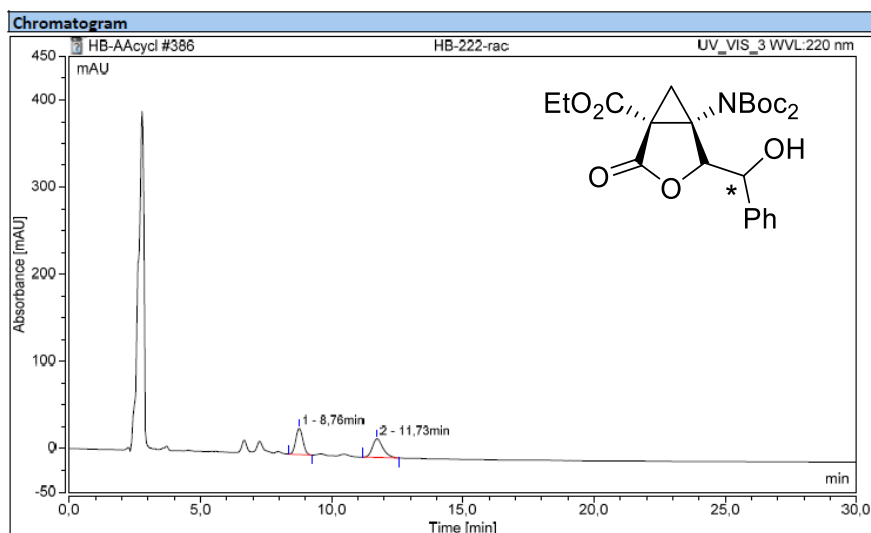

**Integration Results**

| No.    | Peak Name | Retention Time<br>min | Area<br>mAU*min | Height<br>mAU | Relative Area<br>% | Relative Height<br>% | Resolution (EP) |
|--------|-----------|-----------------------|-----------------|---------------|--------------------|----------------------|-----------------|
| 1      |           | 8,76                  | 9,391           | 30,271        | 48,48              | 58,41                | 4,94            |
| 2      |           | 11,73                 | 9,979           | 21,558        | 51,52              | 41,59                | n.a.            |
| Total: |           |                       | 19,370          | 51,829        | 100,00             | 100,00               |                 |

| Injection Details    |                                   |                         |
|----------------------|-----------------------------------|-------------------------|
| Injection Name:      | HB-78-rac                         | Run Time (min): 30,00   |
| Vial Number:         | RA2                               | Injection Volume: 1,00  |
| Injection Type:      | Unknown                           | Channel: UV_VIS_3       |
| Comment:             | IE_Hept:PrOH 80/20 20°C 1.3ml/min | Wavelength: 220         |
| Instrument Method:   | 75A-25C                           | Bandwidth: 4            |
| Processing Method:   | methode traitement                | Dilution Factor: 1,0000 |
| Injection Date/Time: | 13/juin/22 09:23                  | Sample Weight: 1,0000   |

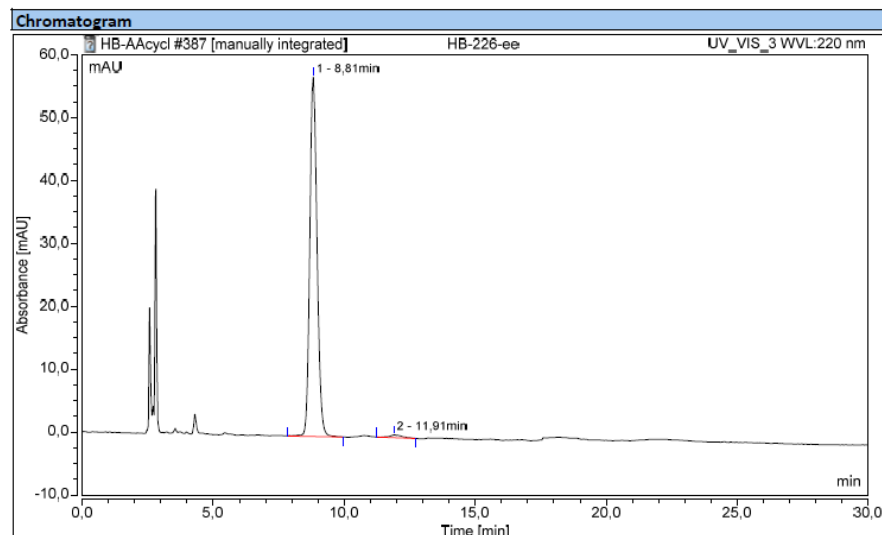

**Integration Results**

| No.    | Peak Name | Retention Time<br>min | Area<br>mAU*min | Height<br>mAU | Relative Area<br>% | Relative Height<br>% | Resolution (EP) |
|--------|-----------|-----------------------|-----------------|---------------|--------------------|----------------------|-----------------|
| 1      |           | 8,81                  | 18,361          | 57,132        | 98,66              | 99,20                | 4,78            |
| 2      |           | 11,91                 | 0,249           | 0,459         | 1,34               | 0,80                 | n.a.            |
| Total: |           |                       | 18,610          | 57,592        | 100,00             | 100,00               |                 |



**Compound 39 : 2-ethyl 1-methyl (1S,2R)-1-(bis(tert-butoxycarbonyl)amino)-2-phenethylcyclopropane-1,2-dicarboxylate**

| Injection Details    |                          |                         |
|----------------------|--------------------------|-------------------------|
| Injection Name:      | HB-78-rac                | Run Time (min): 30,00   |
| Vial Number:         | RA7                      | Injection Volume: 20,00 |
| Injection Type:      | Unknown                  | Channel: UV_VIS_3       |
| Comment:             | IC_Hept:iPrOH 90/10 20°C | Wavelength: 220         |
| Instrument Method:   | 90A-10C                  | Bandwidth: 4            |
| Processing Method:   | methode traitement       | Dilution Factor: 1,0000 |
| Injection Date/Time: | 18/juil./22 11:48        | Sample Weight: 1,0000   |

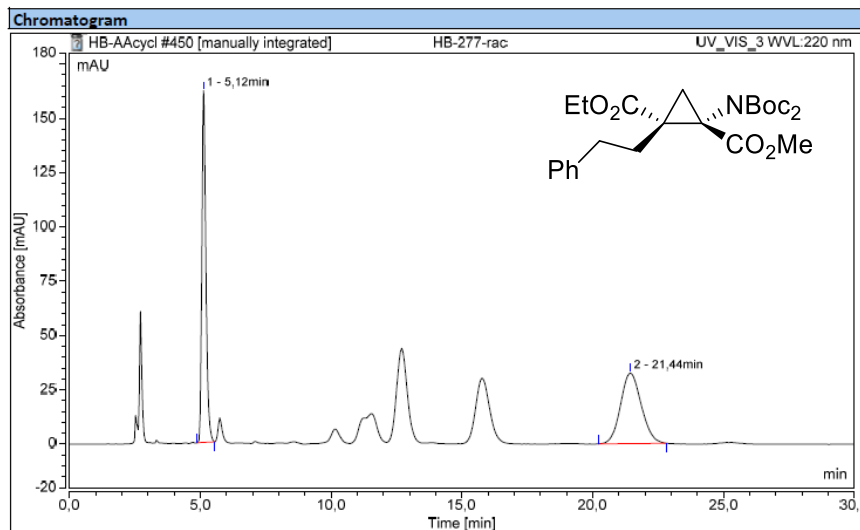

**Integration Results**

| No.    | Peak Name | Retention Time min | Area mAU*min | Height mAU | Relative Area % | Relative Height % | Resolution (EP) |
|--------|-----------|--------------------|--------------|------------|-----------------|-------------------|-----------------|
| 1      |           | 5,12               | 28,821       | 161,967    | 49,20           | 83,31             | 18,98           |
| 2      |           | 21,44              | 29,755       | 32,455     | 50,80           | 16,69             | n.a.            |
| Total: |           |                    | 58,576       | 194,421    | 100,00          | 100,00            |                 |

| Injection Details    |                          |                         |
|----------------------|--------------------------|-------------------------|
| Injection Name:      | HB-78-rac                | Run Time (min): 30,00   |
| Vial Number:         | RA8                      | Injection Volume: 20,00 |
| Injection Type:      | Unknown                  | Channel: UV_VIS_3       |
| Comment:             | IC_Hept:iPrOH 90/10 20°C | Wavelength: 220         |
| Instrument Method:   | 90A-10C                  | Bandwidth: 4            |
| Processing Method:   | methode traitement       | Dilution Factor: 1,0000 |
| Injection Date/Time: | 18/juil./22 11:17        | Sample Weight: 1,0000   |

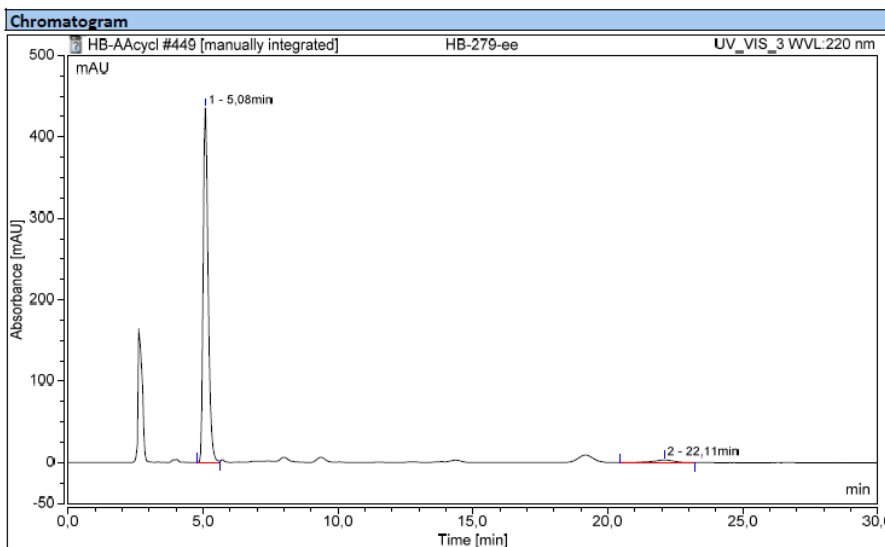

**Integration Results**

| No.    | Peak Name | Retention Time min | Area mAU*min | Height mAU | Relative Area % | Relative Height % | Resolution (EP) |
|--------|-----------|--------------------|--------------|------------|-----------------|-------------------|-----------------|
| 1      |           | 5,08               | 92,309       | 435,270    | 96,63           | 99,25             | 19,77           |
| 2      |           | 22,11              | 3,215        | 3,299      | 3,37            | 0,75              | n.a.            |
| Total: |           |                    | 95,524       | 438,569    | 100,00          | 100,00            |                 |

**Compound 40 : 2-ethyl 1-methyl (1S,2S)-1-(bis(tert-butoxycarbonyl)amino)-2-ethynylcyclopropane-1,2-dicarboxylate**

|                      |                         |                   |          |
|----------------------|-------------------------|-------------------|----------|
| Injection Name:      | HB-78-rac               | Run Time (min):   | 16,67    |
| Vial Number:         | RB6                     | Injection Volume: | 10,00    |
| Injection Type:      | Unknown                 | Channel:          | UV_VIS_3 |
| Comment:             | IB_Hept:iPrOH 98/2 15°C | Wavelength:       | 220      |
| Instrument Method:   | 98A-2C_20min            | Bandwidth:        | 4        |
| Processing Method:   | methode traitement      | Dilution Factor:  | 1,0000   |
| Injection Date/Time: | 31/mai/22 09:40         | Sample Weight:    | 1,0000   |

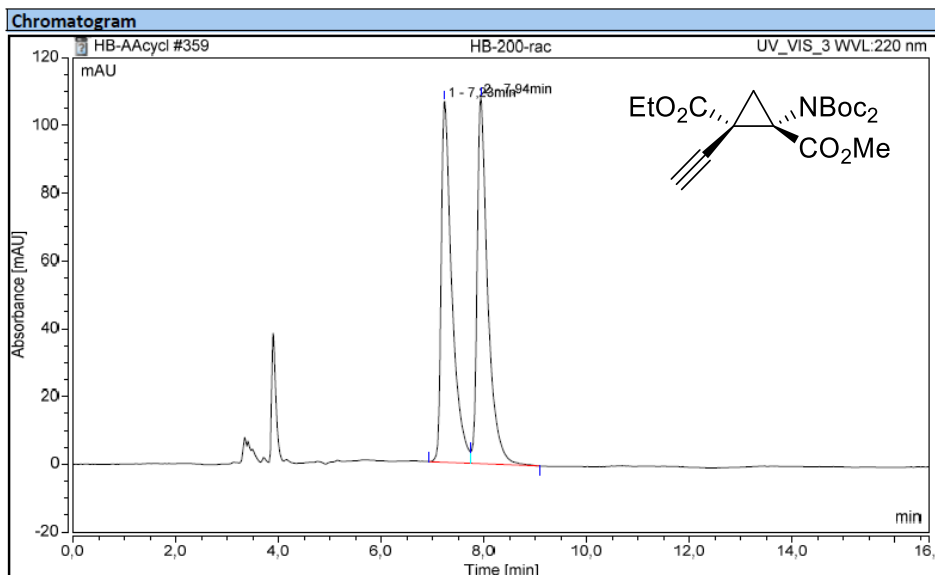

**Integration Results**

| No.           | Peak Name | Retention Time min | Area mAU*min  | Height mAU     | Relative Area % | Relative Height % | Resolution (EP) |
|---------------|-----------|--------------------|---------------|----------------|-----------------|-------------------|-----------------|
| 1             |           | 7,23               | 25,729        | 106,568        | 49,81           | 49,66             | 2,04            |
| 2             |           | 7,94               | 25,924        | 108,007        | 50,19           | 50,34             | n.a.            |
| <b>Total:</b> |           |                    | <b>51,653</b> | <b>214,575</b> | <b>100,00</b>   | <b>100,00</b>     |                 |

|                      |                         |                   |          |
|----------------------|-------------------------|-------------------|----------|
| Injection Name:      | HB-78-rac               | Run Time (min):   | 15,00    |
| Vial Number:         | RB7                     | Injection Volume: | 10,00    |
| Injection Type:      | Unknown                 | Channel:          | UV_VIS_3 |
| Comment:             | IB_Hept:iPrOH 98/2 15°C | Wavelength:       | 220      |
| Instrument Method:   | 98A-2C_20min            | Bandwidth:        | 4        |
| Processing Method:   | methode traitement      | Dilution Factor:  | 1,0000   |
| Injection Date/Time: | 31/mai/22 09:59         | Sample Weight:    | 1,0000   |

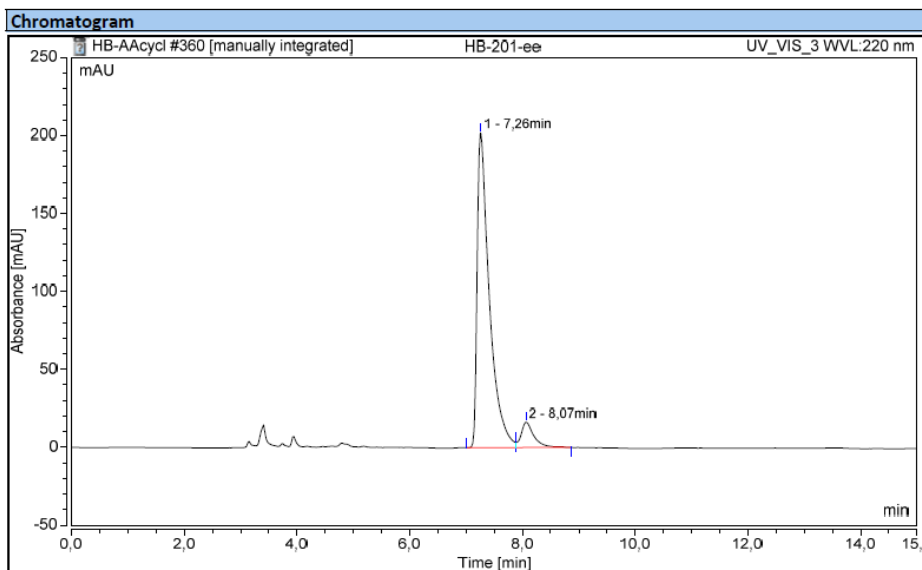

**Integration Results**

| No.           | Peak Name | Retention Time min | Area mAU*min  | Height mAU     | Relative Area % | Relative Height % | Resolution (EP) |
|---------------|-----------|--------------------|---------------|----------------|-----------------|-------------------|-----------------|
| 1             |           | 7,26               | 50,589        | 201,889        | 92,15           | 92,50             | 2,21            |
| 2             |           | 8,07               | 4,312         | 16,367         | 7,85            | 7,50              | n.a.            |
| <b>Total:</b> |           |                    | <b>54,901</b> | <b>218,256</b> | <b>100,00</b>   | <b>100,00</b>     |                 |

## 8. X-ray crystallographic data of 1 (CCDC 2177765)

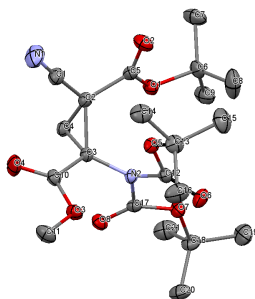

**Table 1.** Crystal data and structure refinement for M22\_05\_Beucher\_23-1\_A1.

|                                             |                                                               |
|---------------------------------------------|---------------------------------------------------------------|
| Identification code                         | M22_05_Beucher_23-1_A1                                        |
| Empirical formula                           | C <sub>21</sub> H <sub>32</sub> N <sub>2</sub> O <sub>8</sub> |
| Formula weight                              | 440.48                                                        |
| Temperature/K                               | 100.00(10)                                                    |
| Crystal system                              | orthorhombic                                                  |
| Space group                                 | P2 <sub>1</sub> 2 <sub>1</sub> 2 <sub>1</sub>                 |
| a/Å                                         | 8.9833(2)                                                     |
| b/Å                                         | 13.0769(2)                                                    |
| c/Å                                         | 20.1678(3)                                                    |
| α/°                                         | 90                                                            |
| β/°                                         | 90                                                            |
| γ/°                                         | 90                                                            |
| Volume/Å <sup>3</sup>                       | 2369.19(7)                                                    |
| Z                                           | 4                                                             |
| ρ <sub>calc</sub> /cm <sup>3</sup>          | 1.235                                                         |
| μ/mm <sup>-1</sup>                          | 0.791                                                         |
| F(000)                                      | 944.0                                                         |
| Crystal size/mm <sup>3</sup>                | 0.394 × 0.107 × 0.081                                         |
| Radiation                                   | Cu Kα (λ = 1.54184)                                           |
| 2θ range for data collection/°              | 8.058 to 153.018                                              |
| Index ranges                                | -10 ≤ h ≤ 11, -16 ≤ k ≤ 15, -24 ≤ l ≤ 25                      |
| Reflections collected                       | 22611                                                         |
| Independent reflections                     | 4942 [R <sub>int</sub> = 0.0240, R <sub>sigma</sub> = 0.0156] |
| Data/restraints/parameters                  | 4942/0/377                                                    |
| Goodness-of-fit on F <sup>2</sup>           | 1.023                                                         |
| Final R indexes [I ≥ 2σ (I)]                | R <sub>1</sub> = 0.0256, wR <sub>2</sub> = 0.0669             |
| Final R indexes [all data]                  | R <sub>1</sub> = 0.0262, wR <sub>2</sub> = 0.0674             |
| Largest diff. peak/hole / e Å <sup>-3</sup> | 0.19/-0.18                                                    |
| Flack parameter                             | 0.00(4)                                                       |

**Table 2.** Fractional Atomic Coordinates ( $\times 10^4$ ) and Equivalent Isotropic Displacement Parameters ( $\text{\AA}^2 \times 10^3$ ) for M22\_05\_Beucher\_23-1\_A1.  $U_{eq}$  is defined as 1/3 of the trace of the orthogonalised  $U_{ij}$  tensor.

| Atom | <i>x</i>   | <i>y</i>   | <i>z</i>   | <i>U</i> (eq) |
|------|------------|------------|------------|---------------|
| O1   | 1558.2(12) | 5393.2(8)  | 4865.1(5)  | 22.5(2)       |
| O5   | 4582.9(11) | 4750.7(7)  | 3823.3(5)  | 19.4(2)       |
| O3   | 6785.2(11) | 6363.0(8)  | 3998.3(5)  | 22.6(2)       |
| O8   | 5485.0(12) | 6498.4(8)  | 5679.0(5)  | 22.3(2)       |
| O7   | 4862.7(12) | 4832.2(8)  | 5815.4(5)  | 22.0(2)       |
| O2   | 1088.2(13) | 5208.0(9)  | 3769.4(5)  | 28.2(2)       |
| O6   | 5532.2(13) | 3864.7(8)  | 4694.4(5)  | 26.9(2)       |
| O4   | 5431.2(14) | 7762.3(9)  | 3768.6(6)  | 32.2(3)       |
| N2   | 4726.9(13) | 5535.3(8)  | 4796.2(5)  | 16.0(2)       |
| C10  | 5568.1(17) | 6940.4(10) | 4029.6(7)  | 19.8(3)       |
| C17  | 5090.0(14) | 5675.8(10) | 5475.7(7)  | 17.1(3)       |
| C12  | 5001.1(15) | 4616.9(10) | 4450.4(7)  | 18.3(3)       |
| C5   | 1699.9(15) | 5613.0(11) | 4228.8(7)  | 19.6(3)       |
| C3   | 4356.0(15) | 6447.1(10) | 4436.0(6)  | 16.6(3)       |
| C4   | 3210.3(16) | 7161.6(10) | 4708.8(7)  | 19.7(3)       |
| N1   | 2422(2)    | 7263.5(13) | 2956.6(8)  | 41.2(4)       |
| C2   | 2755.0(15) | 6507.7(11) | 4130.1(7)  | 18.7(3)       |
| C1   | 2599.3(18) | 6944.8(12) | 3476.2(8)  | 25.0(3)       |
| C18  | 5318.9(17) | 4750.5(13) | 6524.5(7)  | 24.9(3)       |
| C6   | 684.0(17)  | 4488.0(12) | 5095.7(8)  | 26.1(3)       |
| C13  | 5022.0(18) | 4003.9(12) | 3301.0(7)  | 25.6(3)       |
| C20  | 6996.5(19) | 4868.3(16) | 6571.5(8)  | 32.3(4)       |
| C11  | 7965.0(19) | 6759.9(14) | 3577.3(8)  | 29.1(3)       |
| C21  | 4501(2)    | 5538.7(16) | 6942.6(8)  | 33.9(4)       |
| C14  | 4594(2)    | 4572.4(14) | 2674.6(8)  | 31.4(4)       |
| C7   | -927.6(19) | 4609.3(18) | 4891.1(9)  | 36.9(4)       |
| C9   | 852(2)     | 4575.5(16) | 5842.5(9)  | 36.2(4)       |
| C16  | 6687(2)    | 3813.1(16) | 3332.1(9)  | 36.7(4)       |
| C19  | 4840(2)    | 3666.9(16) | 6691.6(9)  | 39.5(4)       |
| C15  | 4100(3)    | 3038.9(14) | 3382.6(10) | 40.4(4)       |
| C8   | 1412(3)    | 3533.8(16) | 4832.4(13) | 49.4(6)       |

**Table 3.** Anisotropic Displacement Parameters ( $\text{\AA}^2 \times 10^3$ ) for M22\_05\_Beucher\_23-1\_A1.  
 The Anisotropic displacement factor exponent takes the form:  $-2\pi^2[h^2a^{*2}U_{11}+2hka^*b^*U_{12}+\dots]$ .

| Atom | $U_{11}$ | $U_{22}$ | $U_{33}$ | $U_{23}$ | $U_{13}$ | $U_{12}$ |
|------|----------|----------|----------|----------|----------|----------|
| O1   | 22.3(5)  | 24.0(5)  | 21.2(5)  | 4.5(4)   | -1.2(4)  | -6.4(4)  |
| O5   | 23.5(5)  | 18.7(5)  | 15.9(4)  | -3.3(4)  | -1.0(4)  | 2.4(4)   |
| O3   | 18.7(5)  | 25.7(5)  | 23.3(5)  | 1.3(4)   | 2.7(4)   | -3.0(4)  |
| O8   | 25.2(5)  | 22.9(5)  | 18.8(4)  | -1.6(4)  | -2.1(4)  | -4.6(4)  |
| O7   | 26.5(5)  | 23.8(5)  | 15.6(4)  | 4.7(4)   | -2.1(4)  | -4.1(4)  |
| O2   | 25.9(5)  | 35.4(6)  | 23.3(5)  | -4.1(4)  | -1.4(4)  | -7.9(5)  |
| O6   | 37.1(6)  | 19.8(5)  | 24.0(5)  | 1.6(4)   | -2.2(5)  | 7.5(5)   |
| O4   | 34.3(6)  | 22.3(5)  | 40.1(6)  | 11.2(5)  | 7.8(5)   | -1.3(5)  |
| N2   | 18.8(5)  | 15.1(5)  | 14.0(5)  | 0.6(4)   | -0.1(4)  | 0.0(4)   |
| C10  | 23.4(7)  | 18.5(6)  | 17.5(6)  | -1.0(5)  | 0.1(5)   | -3.1(5)  |
| C17  | 14.3(6)  | 21.3(6)  | 15.8(6)  | 0.3(5)   | 0.1(5)   | 0.3(5)   |
| C12  | 18.7(6)  | 17.9(6)  | 18.2(6)  | -0.2(5)  | 0.8(5)   | -0.4(5)  |
| C5   | 16.8(6)  | 19.5(6)  | 22.4(6)  | 0.1(5)   | -0.5(5)  | 1.7(5)   |
| C3   | 19.0(6)  | 15.3(6)  | 15.7(6)  | 0.4(5)   | 0.0(5)   | -0.5(5)  |
| C4   | 22.1(7)  | 16.5(6)  | 20.4(7)  | -1.4(5)  | -0.2(5)  | 1.8(5)   |
| N1   | 59.1(10) | 37.2(8)  | 27.5(8)  | 10.5(6)  | -10.2(7) | -3.7(8)  |
| C2   | 19.9(7)  | 18.0(6)  | 18.1(6)  | 1.5(5)   | -0.7(5)  | 1.1(5)   |
| C1   | 29.5(7)  | 22.2(7)  | 23.3(7)  | 2.0(6)   | -2.4(6)  | -0.7(6)  |
| C18  | 25.0(7)  | 35.3(8)  | 14.4(6)  | 6.8(6)   | -1.4(5)  | -0.3(6)  |
| C6   | 22.6(7)  | 25.6(8)  | 30.2(8)  | 6.2(6)   | 2.7(6)   | -7.6(6)  |
| C13  | 31.2(8)  | 25.0(7)  | 20.8(7)  | -10.4(6) | -0.1(6)  | 3.4(6)   |
| C20  | 24.5(7)  | 46.6(10) | 25.8(8)  | 8.2(7)   | -3.9(6)  | 4.0(7)   |
| C11  | 23.5(7)  | 37.2(9)  | 26.6(8)  | -1.6(7)  | 6.6(6)   | -8.2(7)  |
| C21  | 32.1(9)  | 51.8(11) | 17.9(7)  | 2.4(7)   | 4.7(6)   | 4.1(8)   |
| C14  | 35.4(9)  | 39.6(9)  | 19.1(7)  | -6.8(6)  | -1.0(6)  | 1.8(8)   |
| C7   | 23.3(8)  | 55.8(12) | 31.6(9)  | 7.2(8)   | -1.5(7)  | -13.1(8) |
| C9   | 30.6(8)  | 47.9(10) | 30.2(8)  | 15.0(8)  | -4.2(7)  | -15.4(8) |
| C16  | 34.8(9)  | 46.1(10) | 29.4(8)  | -12.8(8) | -0.2(7)  | 14.5(8)  |
| C19  | 48.8(11) | 41.2(10) | 28.5(8)  | 17.1(8)  | -6.8(8)  | -8.0(9)  |
| C15  | 59.2(12) | 25.9(8)  | 36.1(10) | -10.4(7) | -1.2(9)  | -7.1(8)  |
| C8   | 58.2(13) | 24.8(8)  | 65.3(14) | 8.5(9)   | 26.8(12) | -3.1(9)  |

**Table 4.** Bond Lengths for M22\_05\_Beucher\_23-1\_A1.

| <b>Atom</b> | <b>Atom</b> | <b>Length/Å</b> | <b>Atom</b> | <b>Atom</b> | <b>Length/Å</b> |
|-------------|-------------|-----------------|-------------|-------------|-----------------|
| O1          | C5          | 1.3211(17)      | C5          | C2          | 1.5189(19)      |
| O1          | C6          | 1.4947(17)      | C3          | C4          | 1.4950(19)      |
| O5          | C12         | 1.3310(17)      | C3          | C2          | 1.5669(18)      |
| O5          | C13         | 1.4895(16)      | C4          | C2          | 1.5035(19)      |
| O3          | C10         | 1.3303(18)      | N1          | C1          | 1.139(2)        |
| O3          | C11         | 1.4538(18)      | C2          | C1          | 1.444(2)        |
| O8          | C17         | 1.2046(17)      | C18         | C20         | 1.518(2)        |
| O7          | C17         | 1.3146(17)      | C18         | C21         | 1.521(2)        |
| O7          | C18         | 1.4915(16)      | C18         | C19         | 1.519(2)        |
| O2          | C5          | 1.2003(18)      | C6          | C7          | 1.514(2)        |
| O6          | C12         | 1.1989(18)      | C6          | C9          | 1.518(2)        |
| O4          | C10         | 1.2030(18)      | C6          | C8          | 1.506(3)        |
| N2          | C17         | 1.4205(17)      | C13         | C14         | 1.515(2)        |
| N2          | C12         | 1.4105(17)      | C13         | C16         | 1.518(2)        |
| N2          | C3          | 1.4355(17)      | C13         | C15         | 1.518(2)        |
| C10         | C3          | 1.5078(19)      |             |             |                 |

**Table 5.** Bond Angles for M22\_05\_Beucher\_23-1\_A1.

| <b>Atom</b> | <b>Atom</b> | <b>Atom</b> | <b>Angle/°</b> | <b>Atom</b> | <b>Atom</b> | <b>Atom</b> | <b>Angle/°</b> |
|-------------|-------------|-------------|----------------|-------------|-------------|-------------|----------------|
| C5          | O1          | C6          | 121.68(12)     | C5          | C2          | C3          | 118.83(11)     |
| C12         | O5          | C13         | 120.74(11)     | C4          | C2          | C5          | 120.40(12)     |
| C10         | O3          | C11         | 115.10(12)     | C4          | C2          | C3          | 58.23(9)       |
| C17         | O7          | C18         | 121.15(11)     | C1          | C2          | C5          | 111.35(12)     |
| C17         | N2          | C3          | 115.73(11)     | C1          | C2          | C3          | 117.94(12)     |
| C12         | N2          | C17         | 123.16(11)     | C1          | C2          | C4          | 120.67(13)     |
| C12         | N2          | C3          | 119.84(10)     | N1          | C1          | C2          | 176.96(18)     |
| O3          | C10         | C3          | 112.12(12)     | O7          | C18         | C20         | 108.99(12)     |
| O4          | C10         | O3          | 124.77(14)     | O7          | C18         | C21         | 110.50(12)     |
| O4          | C10         | C3          | 123.11(14)     | O7          | C18         | C19         | 101.64(12)     |
| O8          | C17         | O7          | 128.15(13)     | C20         | C18         | C21         | 112.11(15)     |
| O8          | C17         | N2          | 120.76(12)     | C20         | C18         | C19         | 111.23(15)     |
| O7          | C17         | N2          | 111.01(11)     | C19         | C18         | C21         | 111.87(15)     |
| O5          | C12         | N2          | 107.98(11)     | O1          | C6          | C7          | 109.55(13)     |
| O6          | C12         | O5          | 127.60(13)     | O1          | C6          | C9          | 101.34(12)     |
| O6          | C12         | N2          | 124.42(12)     | O1          | C6          | C8          | 108.56(13)     |
| O1          | C5          | C2          | 110.80(12)     | C7          | C6          | C9          | 110.97(14)     |
| O2          | C5          | O1          | 127.56(14)     | C8          | C6          | C7          | 113.97(18)     |
| O2          | C5          | C2          | 121.63(13)     | C8          | C6          | C9          | 111.66(17)     |
| N2          | C3          | C10         | 117.57(12)     | O5          | C13         | C14         | 101.59(12)     |
| N2          | C3          | C4          | 119.52(11)     | O5          | C13         | C16         | 109.85(13)     |
| N2          | C3          | C2          | 117.02(11)     | O5          | C13         | C15         | 108.90(13)     |
| C10         | C3          | C2          | 115.29(11)     | C14         | C13         | C16         | 111.40(15)     |
| C4          | C3          | C10         | 115.45(12)     | C14         | C13         | C15         | 111.10(15)     |
| C4          | C3          | C2          | 58.76(9)       | C16         | C13         | C15         | 113.34(16)     |
| C3          | C4          | C2          | 63.01(9)       |             |             |             |                |

**Table 6.** Torsion Angles for M22\_05\_Beucher\_23-1\_A1.

| <b>A</b> | <b>B</b> | <b>C</b> | <b>D</b> | <b>Angle/°</b> | <b>A</b> | <b>B</b> | <b>C</b> | <b>D</b> | <b>Angle/°</b> |
|----------|----------|----------|----------|----------------|----------|----------|----------|----------|----------------|
| O1       | C5       | C2       | C3       | 54.45(16)      | C12      | O5       | C13      | C14      | -168.69(13)    |
| O1       | C5       | C2       | C4       | -13.60(18)     | C12      | O5       | C13      | C16      | -50.65(19)     |
| O1       | C5       | C2       | C1       | -163.42(12)    | C12      | O5       | C13      | C15      | 74.02(17)      |
| O3       | C10      | C3       | N2       | 8.35(16)       | C12      | N2       | C17      | O8       | 146.15(13)     |
| O3       | C10      | C3       | C4       | 158.13(12)     | C12      | N2       | C17      | O7       | -36.79(17)     |
| O3       | C10      | C3       | C2       | -136.10(12)    | C12      | N2       | C3       | C10      | -70.17(16)     |
| O2       | C5       | C2       | C3       | -127.00(15)    | C12      | N2       | C3       | C4       | 141.31(13)     |
| O2       | C5       | C2       | C4       | 164.95(13)     | C12      | N2       | C3       | C2       | 73.66(16)      |
| O2       | C5       | C2       | C1       | 15.13(19)      | C5       | O1       | C6       | C7       | -62.43(18)     |
| O4       | C10      | C3       | N2       | -171.53(13)    | C5       | O1       | C6       | C9       | -179.73(14)    |
| O4       | C10      | C3       | C4       | -21.8(2)       | C5       | O1       | C6       | C8       | 62.6(2)        |
| O4       | C10      | C3       | C2       | 44.02(19)      | C3       | N2       | C17      | O8       | -20.91(19)     |
| N2       | C3       | C4       | C2       | -105.50(13)    | C3       | N2       | C17      | O7       | 156.15(11)     |
| N2       | C3       | C2       | C5       | -0.07(18)      | C3       | N2       | C12      | O5       | -11.24(17)     |
| N2       | C3       | C2       | C4       | 109.72(13)     | C3       | N2       | C12      | O6       | 168.17(14)     |
| N2       | C3       | C2       | C1       | -139.74(13)    | C3       | C4       | C2       | C5       | 107.11(14)     |
| C10      | C3       | C4       | C2       | 105.34(13)     | C3       | C4       | C2       | C1       | -105.87(15)    |
| C10      | C3       | C2       | C5       | 144.58(13)     | C4       | C3       | C2       | C5       | -109.79(14)    |
| C10      | C3       | C2       | C4       | -105.63(13)    | C4       | C3       | C2       | C1       | 110.54(15)     |
| C10      | C3       | C2       | C1       | 4.91(18)       | C18      | O7       | C17      | O8       | -10.0(2)       |
| C17      | O7       | C18      | C20      | -62.38(18)     | C18      | O7       | C17      | N2       | 173.19(11)     |
| C17      | O7       | C18      | C21      | 61.23(17)      | C6       | O1       | C5       | O2       | 6.8(2)         |
| C17      | O7       | C18      | C19      | -179.89(14)    | C6       | O1       | C5       | C2       | -174.75(12)    |
| C17      | N2       | C12      | O5       | -177.80(11)    | C13      | O5       | C12      | O6       | -12.5(2)       |
| C17      | N2       | C12      | O6       | 1.6(2)         | C13      | O5       | C12      | N2       | 166.93(11)     |
| C17      | N2       | C3       | C10      | 97.36(14)      | C11      | O3       | C10      | O4       | -4.1(2)        |
| C17      | N2       | C3       | C4       | -51.16(17)     | C11      | O3       | C10      | C3       | 176.06(12)     |
| C17      | N2       | C3       | C2       | -118.81(13)    |          |          |          |          |                |



**Table 7.** Hydrogen Atom Coordinates ( $\text{\AA}\times 10^4$ ) and Isotropic Displacement Parameters ( $\text{\AA}^2\times 10^3$ ) for M22\_05\_Beucher\_23-1\_A1.

| <b>Atom</b> | <b>x</b>  | <b>y</b> | <b>z</b> | <b>U(eq)</b> |
|-------------|-----------|----------|----------|--------------|
| H4A         | 2760(20)  | 6963(15) | 5137(9)  | 24           |
| H4B         | 3380(20)  | 7874(15) | 4613(9)  | 24           |
| H20A        | 7460(30)  | 4360(20) | 6292(12) | 48           |
| H20B        | 7310(30)  | 5550(20) | 6419(12) | 48           |
| H20C        | 7310(30)  | 4780(20) | 7033(13) | 48           |
| H11A        | 7530(30)  | 6947(19) | 3134(12) | 44           |
| H11B        | 8400(30)  | 7369(18) | 3776(11) | 44           |
| H11C        | 8690(30)  | 6180(19) | 3545(12) | 44           |
| H21A        | 4930(30)  | 6240(20) | 6873(12) | 51           |
| H21B        | 3420(30)  | 5540(20) | 6837(13) | 51           |
| H21C        | 4600(30)  | 5350(20) | 7387(13) | 51           |
| H14A        | 3530(30)  | 4770(20) | 2684(12) | 47           |
| H14B        | 5160(30)  | 5210(20) | 2608(12) | 47           |
| H14C        | 4790(30)  | 4144(19) | 2274(12) | 47           |
| H7A         | -1380(30) | 5300(20) | 5065(13) | 55           |
| H7B         | -1040(30) | 4570(20) | 4414(14) | 55           |
| H7C         | -1490(30) | 4060(20) | 5100(13) | 55           |
| H9A         | 1890(30)  | 4540(20) | 5967(13) | 54           |
| H9B         | 370(30)   | 5260(20) | 6023(13) | 54           |
| H9C         | 360(30)   | 4010(20) | 6068(13) | 54           |
| H16A        | 7250(30)  | 4460(20) | 3336(12) | 55           |
| H16B        | 6930(30)  | 3400(20) | 3725(14) | 55           |
| H16C        | 7000(30)  | 3410(20) | 2924(13) | 55           |
| H19A        | 3720(30)  | 3630(20) | 6682(14) | 59           |
| H19B        | 5350(30)  | 3160(20) | 6376(14) | 59           |
| H19C        | 5140(30)  | 3510(20) | 7166(14) | 59           |
| H15A        | 4280(30)  | 2710(20) | 3822(14) | 61           |
| H15B        | 2940(40)  | 3220(20) | 3329(13) | 61           |
| H15C        | 4370(30)  | 2570(20) | 3019(14) | 61           |
| H8A         | 1300(40)  | 3510(20) | 4361(17) | 74           |
| H8B         | 2490(40)  | 3520(20) | 4949(15) | 74           |
| H8C         | 870(40)   | 2960(20) | 4996(15) | 74           |

## Experimental

Single crystals of  $C_{21}H_{32}N_2O_8$  [M22\_05\_Beucher\_23-1\_A1] were synthesized. A suitable crystal was selected and mounted on a SuperNova, Dual, Cu at home/near, Atlas diffractometer. The crystal was kept at 100.00(10) K during data collection. Using Olex2 [1], the structure was solved with the SHELXT [2] structure solution program using Intrinsic Phasing and refined with the XL [3] refinement package using Least Squares minimisation.

Dolomanov, O.V., Bourhis, L.J., Gildea, R.J., Howard, J.A.K. & Puschmann, H. (2009), *J. Appl. Cryst.* 42, 339-341.

Sheldrick, G.M. (2015). *Acta Cryst.* A71, 3-8.

Sheldrick, G.M. (2008). *Acta Cryst.* A64, 112-122.

Crystal structure determination of [M22\_05\_Beucher\_23-1\_A1]

**Crystal Data** for  $C_{21}H_{32}N_2O_8$  ( $M = 440.48$  g/mol): orthorhombic, space group  $P2_12_12_1$  (no. 19),  $a = 8.9833(2)$  Å,  $b = 13.0769(2)$  Å,  $c = 20.1678(3)$  Å,  $V = 2369.19(7)$  Å<sup>3</sup>,  $Z = 4$ ,  $T = 100.00(10)$  K,  $\mu(\text{Cu K}\alpha) = 0.791$  mm<sup>-1</sup>,  $D_{\text{calc}} = 1.235$  g/cm<sup>3</sup>, 22611 reflections measured ( $8.058^\circ \leq 2\theta \leq 153.018^\circ$ ), 4942 unique ( $R_{\text{int}} = 0.0240$ ,  $R_{\text{sigma}} = 0.0156$ ) which were used in all calculations. The final  $R_1$  was 0.0256 ( $I > 2\sigma(I)$ ) and  $wR_2$  was 0.0674 (all data).

Refinement model description

Number of restraints - 0, number of constraints - unknown.

Details:

1.Fixed Uiso

At 1.2 times of:

All C(H,H) groups

At 1.5 times of:

All C(H,H,H) groups

## 9. X-ray crystallographic data of 27 (CCDC 2350765)

### DATA COLLECTION

The crystal structure of **AT020** [ $C_{23}H_{27}BrNO_7P$ ] has been determined from single crystal X-Ray diffraction. The chosen crystal was stuck on a glass fibre and mounted on a kappa goniometer of a Bruker D8-VENTURE diffractometer equipped with a PHOTON area detector. A series of exposures ( ) were recorded see in annexe 1,

The cell parameters and the orientation matrix of the crystal were preliminary determined by using APEX Software<sup>1</sup>. Data integration and global cell refinement were performed with SAINT Software<sup>2</sup>. Intensities were corrected for Lorentz, polarisation, decay and absorption effects (SADABS Software<sup>2</sup>) and reduced to  $F_o^2$ . The program package WinGX<sup>3</sup> was used for space group determination, structure solution and refinement.

### DATA REFINEMENT

The standard space group  $P2_12_12_1$  ( $n^\circ 19$ ) was determined from systematic extinctions and relative  $F_o^2$  of equivalent reflections. The structure was solved by direct methods<sup>4</sup>. Anisotropic displacement parameters were refined for all non-hydrogen atoms. Every Hydrogen atoms were located from subsequent difference Fourier syntheses and placed with geometrical constraints (SHELXL<sup>4</sup>). The final cycle of full-matrix least-square refinement on  $F^2$  was based on 5510 observed reflections and 301 variable parameters and converged with unweighted and weighted agreement factors of:

$R1 = 0.0446$ ,  $wR2 = 0.1374$  for xxx reflections with  $I > 2\sigma I$  and  $R1 = 0.0466$ ,  $wR2 = 0.1402$  for all data.

The refinement data are summarized in annexe 1 table 2

## CRYSTALLOGRAPHIC DATA AND STRUCTURAL DESCRIPTION

### Crystallographic data

The crystal data are collected in Table 1. The full crystallographic parameters (atomic coordinates, bond length, angles and anisotropic displacements) are reported in annexe 2.

**Table 1: Crystal data**

|                                                                         |                                                       |
|-------------------------------------------------------------------------|-------------------------------------------------------|
| Chemical Formula                                                        | C <sub>23</sub> H <sub>27</sub> BrNO <sub>7</sub> P   |
| Molecular Weight / <i>g.mol</i> <sup>-1</sup>                           | 540.3                                                 |
| Crystal System                                                          | Orthorhombic                                          |
| Space Group                                                             | <i>P</i> 2 <sub>1</sub> 2 <sub>1</sub> 2 <sub>1</sub> |
| Z, Z' (asymmetric units per unit cell)                                  | 4, 1                                                  |
| a / Å                                                                   | 8.6222(2)                                             |
| b / Å                                                                   | 13.3983(3)                                            |
| c / Å                                                                   | 22.3429(5)                                            |
| α / °                                                                   | 90                                                    |
| β / °                                                                   | 90                                                    |
| γ / °                                                                   | 90                                                    |
| V / Å <sup>3</sup>                                                      | 2581.12(1)                                            |
| d <sub>calc</sub> / <i>g.cm</i> <sup>-3</sup>                           | 1.390                                                 |
| F(000) / e <sup>-</sup>                                                 | 1112                                                  |
| Absorption coefficient μ (MoKα <sub>1</sub> ) / <i>mm</i> <sup>-1</sup> | 3.110                                                 |

### Structural description

The Asymmetric unit is composed of one molecule of C<sub>23</sub>H<sub>27</sub>BrNO<sub>7</sub>P (Figures 1 and 2). The stereogenic centres are C1 and C2, that exhibit a S and R configuration respectively.

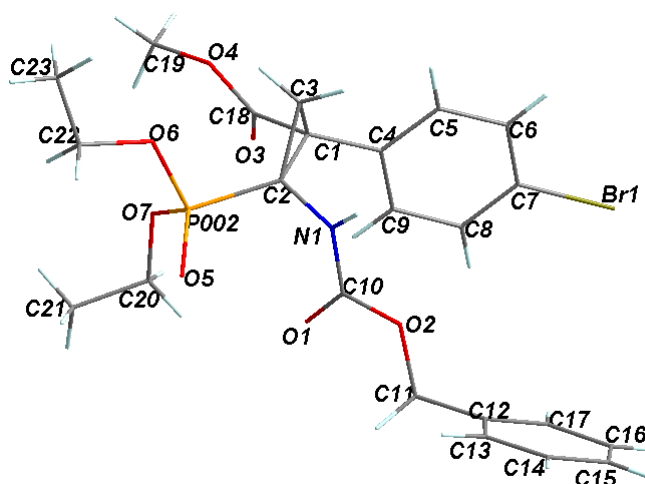

Figure 1: Asymmetric unit with atom labelled.

The stereogenic centres C1 and C2 are S and R respectively.

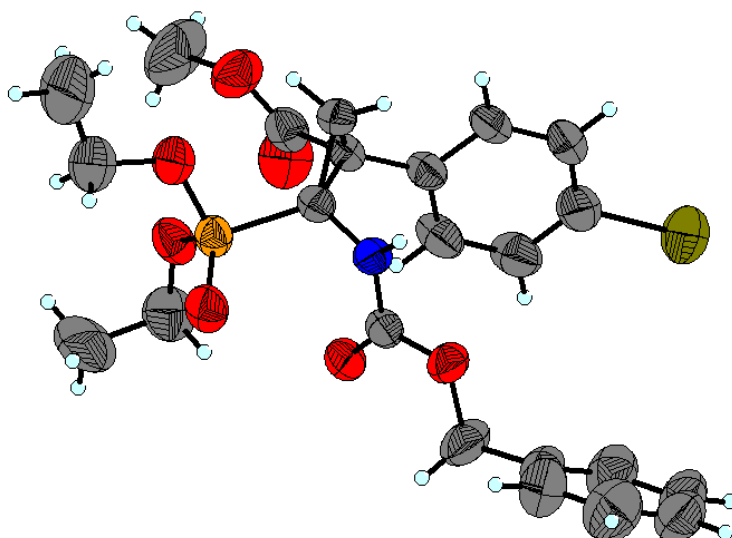

Figure 2 : asymmetric unit in thermal ellipsoidal representation (50% of probability)

Table 1: Hydrogen bond table

| D-H...A            | d(D-H) | d(H...A) | d(D...A) | <(DHA) |
|--------------------|--------|----------|----------|--------|
| N(1)-H(1)...O(5)#1 | 0.86   | 1.98     | 2.795(4) | 158    |

Symmetry transformations used to generate equivalent atoms: #1  $x-1/2, -y+3/2, -z+1$

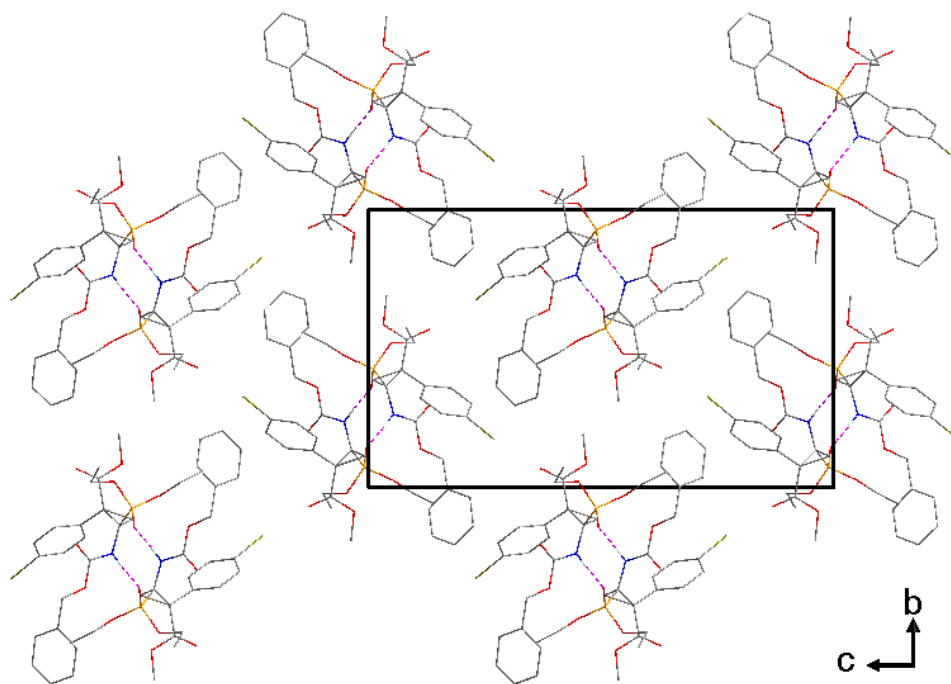

Figure 3: Projection along a axis

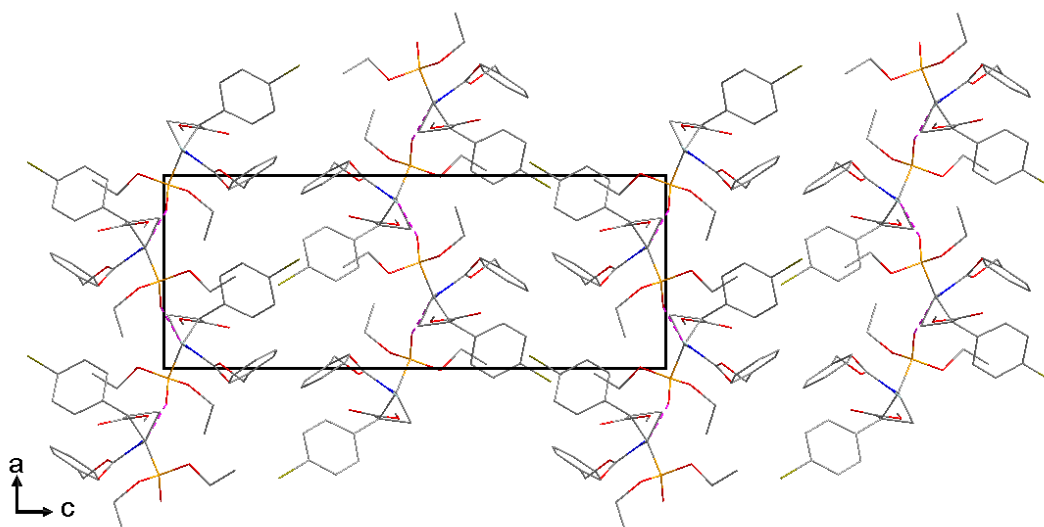

Figure 4: Projection along b axis

Sofwares :

(1)- APEX. V2022.10-1

(2)- SAINT V8.40B Bruker AXS LLC.219

- SADABS – 2016/2 – Bruker AXS area detector scaling and absorption correction

(3)- WinGX: Version 2023.1: An integrated system of Windows Programs for the solution, refinement and analysis of Single Crystal X-Ray Diffraction Data, By Louis J. Farrugia, Dept. of chemistry, University of Glasgow. L. J. Farrugia (2012) J. Appl. Cryst. 45, 849-854.

(4)-include in WinGX suite :

- SIR 92: A. Altomare, G. Cascarano, C. Giacovazzo and A. Guagliardi, J. Appl. Crystallogr., 1994, 27, 435.;

- SHELX & SHELXTL program: G. M. Sheldrick, Acta Crystallogr., Sect. A: Found. Crystallogr., 2008, 64, 112-122..

(6)-PowderCell for Windows (version 2.4) by Kraus W. & Nolze G., Federal institute for materials Research and testing, Rudower Chausse 5, 12489 Berlin Germany.

**ANNEXE 1 :**

**- Table 1 : DATA COLLECTION FOR AT020 -**

**Scan parameters : D=40.0168mm,  $\lambda = 1.54184 \text{ \AA}$**

| Axis  | $2\theta/^\circ$ | $\omega/^\circ$ | $\phi/^\circ$ | $\chi/^\circ$ | Width/ $^\circ$ | Frames |
|-------|------------------|-----------------|---------------|---------------|-----------------|--------|
| Phi   | 55               | 0               | 0             | 54.74         | 1               | 180    |
| Phi   | 55               | 0               | 180           | 54.74         | 1               | 180    |
| Omega | 109.52           | 107.37          | -40           | -44.5         | 0.5             | 216    |
| Omega | 109.52           | 117.3           | 160           | 65.5          | 0.5             | 245    |
| Omega | -48.14           | -153.55         | 153           | 44.5          | 0.5             | 216    |
| Omega | 109.52           | 107.37          | -80           | -44.5         | 0.5             | 216    |
| Omega | 109.52           | 107.37          | 0             | -44.5         | 0.5             | 216    |
| Omega | -48.14           | -55.86          | 0             | -65.5         | 0.5             | 192    |
| Omega | 109.52           | 117.3           | -120          | 65.5          | 0.5             | 245    |
| Omega | 109.52           | 215.37          | 160           | -44.5         | 0.5             | 216    |
| Omega | 109.52           | -5.2            | -80           | 65.5          | 0.5             | 245    |
| Omega | 109.52           | 117.3           | -40           | 65.5          | 0.5             | 245    |
| Omega | 109.52           | 107.37          | -120          | -44.5         | 0.5             | 216    |
| Omega | 109.52           | 79.76           | 108           | 68.5          | 0.5             | 162    |
| Omega | 109.52           | 107.37          | 40            | -44.5         | 0.5             | 216    |
| Omega | 109.52           | 117.3           | 120           | 65.5          | 0.5             | 245    |
| Omega | 109.52           | -5.2            | 80            | 65.5          | 0.5             | 245    |
| Omega | 109.52           | 79.76           | 180           | 68.5          | 0.5             | 162    |
| Omega | -48.14           | -45.55          | 51            | 44.5          | 0.5             | 216    |
| Phi   | 109.52           | 14.28           | -58.34        | 22            | 0.5             | 505    |
| Omega | 109.52           | 107.37          | 120           | -44.5         | 0.5             | 216    |
| Omega | 109.52           | 107.37          | 80            | -44.5         | 0.5             | 216    |
| Phi   | -48.14           | -39.51          | -261.65       | 22            | 0.5             | 391    |
| Omega | -48.14           | -45.55          | 102           | 44.5          | 0.5             | 216    |
| Omega | 109.52           | 215.37          | -160          | -44.5         | 0.5             | 216    |
| Omega | 109.52           | 117.3           | -160          | 65.5          | 0.5             | 245    |
| Omega | -48.14           | -45.55          | 0             | 44.5          | 0.5             | 216    |
| Omega | 109.52           | -5.2            | 0             | 65.5          | 0.5             | 245    |

|                                                                  |                                                          |
|------------------------------------------------------------------|----------------------------------------------------------|
| Unique reflections [ $F_o > 4.0 \sigma(F_o)$ ]                   | 5510                                                     |
| $\theta$ range / $^\circ$                                        | 3.847 to 80.173                                          |
| hkl range                                                        | $0 \leq h \leq 10, 0 \leq k \leq 16, -28 \leq l \leq 28$ |
| $R_{int} = \Sigma[ F_o^2 - F_o^2(\text{mean}) ] / \Sigma[F_o^2]$ | 0.039                                                    |
| Completeness to $\theta = 26.40 / \%$                            | 99.4                                                     |

**- Table 2 : REFINEMENT DATA FOR AT020**

|                                                                  |                           |
|------------------------------------------------------------------|---------------------------|
| Number of reflections (n) (with $F_o > 4.0 \sigma(F_o)$ )        | 5249                      |
| Number of refined parameters (p) / restraints                    | 301 / 0                   |
| Final R indices [ $I > 2\sigma(I)$ ]                             | R1 = 0.0446, wR2 = 0.1374 |
| R indices (all data)                                             | R1 = 0.0466, wR2 = 0.1402 |
| Goodness of Fit indicator (Restrained GooF)                      | 1.023                     |
| Maximum peak in Final Difference Map / $e \cdot \text{\AA}^{-3}$ | 0.752                     |
| Maximum hole in Final Difference Map / $e \cdot \text{\AA}^{-3}$ | -0.313                    |

$$R_1 = \frac{\sum (|F_o| - |F_c|)}{\sum |F_o|}$$

$$wR_2 = \left[ \frac{\sum [w (F_o^2 - F_c^2)^2]}{\sum [w (F_o^2)^2]} \right]^{1/2}$$

$$\text{GooF} = \left[ \frac{\sum [w (F_o^2 - F_c^2)^2]}{(n - p)} \right]^{1/2}$$



## ANNEXE 2 : CRYSTALLOGRAPHIC DATA

**Table 1a:** Atomic coordinates ( $\times 10^4$ ) and equivalent isotropic displacement parameters ( $\text{\AA}^2 \times 10^3$ ).

U(eq) is defined as one third of the trace of the orthogonalized  $U_{ij}$  tensor

|        | x        | y         | z       | U(eq)  |
|--------|----------|-----------|---------|--------|
| C(1)   | 2421(3)  | 9219(2)   | 5707(1) | 45(1)  |
| C(2)   | 3753(4)  | 8657(2)   | 5368(1) | 42(1)  |
| C(3)   | 2207(4)  | 8867(3)   | 5078(2) | 49(1)  |
| C(4)   | 1651(4)  | 8667(3)   | 6209(2) | 49(1)  |
| C(5)   | 234(4)   | 8209(3)   | 6118(2) | 60(1)  |
| C(6)   | -461(5)  | 7659(4)   | 6567(2) | 73(1)  |
| C(7)   | 281(5)   | 7552(4)   | 7102(2) | 70(1)  |
| C(8)   | 1674(5)  | 8018(5)   | 7214(2) | 73(1)  |
| C(9)   | 2352(4)  | 8585(4)   | 6767(2) | 64(1)  |
| C(10)  | 4852(4)  | 7388(2)   | 6007(1) | 45(1)  |
| C(11)  | 5656(8)  | 6029(4)   | 6599(3) | 91(2)  |
| C(12)  | 5229(6)  | 4950(4)   | 6698(2) | 78(2)  |
| C(13)  | 5737(9)  | 4235(5)   | 6298(3) | 97(2)  |
| C(14)  | 5355(11) | 3249(6)   | 6376(4) | 115(2) |
| C(15)  | 4534(9)  | 2955(5)   | 6846(3) | 97(2)  |
| C(16)  | 4021(10) | 3613(6)   | 7252(3) | 108(2) |
| C(17)  | 4378(9)  | 4646(5)   | 7184(3) | 95(2)  |
| C(18)  | 2610(4)  | 10324(3)  | 5823(2) | 57(1)  |
| C(19)  | 2678(13) | 11906(4)  | 5383(4) | 128(3) |
| C(20)  | 6881(7)  | 10198(4)  | 5988(3) | 84(1)  |
| C(21)  | 8353(9)  | 10726(6)  | 5811(6) | 136(4) |
| C(22)  | 6018(8)  | 10171(7)  | 4073(4) | 114(3) |
| C(23)  | 5252(14) | 10583(12) | 3583(5) | 187(6) |
| Br(1)  | -652(1)  | 6736(1)   | 7700(1) | 103(1) |
| N(1)   | 3970(3)  | 7638(2)   | 5531(1) | 44(1)  |
| O(1)   | 5661(3)  | 7946(2)   | 6293(1) | 56(1)  |
| O(2)   | 4716(3)  | 6396(2)   | 6113(1) | 57(1)  |
| O(3)   | 2872(5)  | 10683(3)  | 6298(2) | 85(1)  |
| O(4)   | 2424(5)  | 10848(2)  | 5316(2) | 79(1)  |
| O(5)   | 6826(3)  | 8586(2)   | 5053(1) | 62(1)  |
| O(6)   | 4922(4)  | 9727(3)   | 4487(1) | 70(1)  |
| O(7)   | 5818(3)  | 10216(2)  | 5485(2) | 62(1)  |
| P(002) | 5498(1)  | 9266(1)   | 5094(1) | 48(1)  |

**Table 1b:** Hydrogen coordinates ( $\times 10^4$ ) and equivalent isotropic displacement parameters ( $\text{\AA}^2 \times 10^3$ ).U(eq) is defined as one third of the trace of the orthogonalized  $U_{ij}$  tensor

|        | x     | y     | z    | U(eq) |
|--------|-------|-------|------|-------|
| H(3A)  | 2179  | 9369  | 4765 | 58    |
| H(3B)  | 1517  | 8305  | 5013 | 58    |
| H(5)   | -257  | 8272  | 5749 | 72    |
| H(6)   | -1425 | 7366  | 6506 | 88    |
| H(8)   | 2153  | 7953  | 7585 | 88    |
| H(9)   | 3283  | 8912  | 6841 | 76    |
| H(11A) | 5461  | 6414  | 6959 | 109   |
| H(11B) | 6748  | 6086  | 6500 | 109   |
| H(13)  | 6344  | 4424  | 5973 | 117   |
| H(14)  | 5678  | 2780  | 6095 | 138   |
| H(15)  | 4310  | 2281  | 6894 | 116   |
| H(16)  | 3435  | 3397  | 7577 | 129   |
| H(17)  | 4039  | 5108  | 7466 | 114   |
| H(19A) | 1803  | 12201 | 5581 | 192   |
| H(19B) | 2802  | 12205 | 4995 | 192   |
| H(19C) | 3596  | 12017 | 5616 | 192   |
| H(20A) | 7108  | 9514  | 6098 | 101   |
| H(20B) | 6415  | 10529 | 6330 | 101   |
| H(21A) | 8897  | 10334 | 5519 | 205   |
| H(21B) | 8996  | 10814 | 6158 | 205   |
| H(21C) | 8104  | 11366 | 5644 | 205   |
| H(22A) | 6606  | 10687 | 4276 | 137   |
| H(22B) | 6741  | 9665  | 3936 | 137   |
| H(23A) | 4579  | 10091 | 3409 | 280   |
| H(23B) | 5999  | 10795 | 3291 | 280   |
| H(23C) | 4650  | 11146 | 3711 | 280   |
| H(1)   | 3531  | 7177  | 5324 | 53    |

**Table 2:** Angles (°)

|                  |          |                     |          |                     |            |
|------------------|----------|---------------------|----------|---------------------|------------|
| C(3)-C(1)-C(4)   | 119.6(3) | O(1)-C(10)-O(2)     | 124.5(3) | O(7)-C(20)-H(20A)   | 109.9      |
| C(3)-C(1)-C(18)  | 119.0(3) | N(1)-C(10)-O(2)     | 109.5(3) | C(21)-C(20)-H(20A)  | 109.9      |
| C(4)-C(1)-C(18)  | 113.7(3) | O(2)-C(11)-C(12)    | 107.5(4) | O(7)-C(20)-H(20B)   | 109.9      |
| C(3)-C(1)-C(2)   | 59.0(2)  | O(2)-C(11)-H(11A)   | 110.2    | C(21)-C(20)-H(20B)  | 109.9      |
| C(4)-C(1)-C(2)   | 116.6(3) | C(12)-C(11)-H(11A)  | 110.2    | H(20A)-C(20)-H(20B) | 108.3      |
| C(18)-C(1)-C(2)  | 118.3(3) | O(2)-C(11)-H(11B)   | 110.2    | C(20)-C(21)-H(21A)  | 109.5      |
| N(1)-C(2)-C(3)   | 113.9(3) | C(12)-C(11)-H(11B)  | 110.2    | C(20)-C(21)-H(21B)  | 109.5      |
| N(1)-C(2)-C(1)   | 115.7(3) | H(11A)-C(11)-H(11B) | 108.5    | H(21A)-C(21)-H(21B) | 109.5      |
| C(3)-C(2)-C(1)   | 58.1(2)  | C(17)-C(12)-C(13)   | 118.4(5) | C(20)-C(21)-H(21C)  | 109.5      |
| N(1)-C(2)-P(002) | 114.1(2) | C(17)-C(12)-C(11)   | 122.1(6) | H(21A)-C(21)-H(21C) | 109.5      |
| C(3)-C(2)-P(002) | 120.1(2) | C(13)-C(12)-C(11)   | 119.5(6) | H(21B)-C(21)-H(21C) | 109.5      |
| C(1)-C(2)-P(002) | 123.6(2) | C(14)-C(13)-C(12)   | 120.6(7) | C(23)-C(22)-O(6)    | 110.8(7)   |
| C(1)-C(3)-C(2)   | 62.9(2)  | C(14)-C(13)-H(13)   | 119.7    | C(23)-C(22)-H(22A)  | 109.5      |
| C(1)-C(3)-H(3A)  | 117.5    | C(12)-C(13)-H(13)   | 119.7    | O(6)-C(22)-H(22A)   | 109.5      |
| C(2)-C(3)-H(3A)  | 117.5    | C(15)-C(14)-C(13)   | 121.0(8) | C(23)-C(22)-H(22B)  | 109.5      |
| C(1)-C(3)-H(3B)  | 117.5    | C(15)-C(14)-H(14)   | 119.5    | O(6)-C(22)-H(22B)   | 109.5      |
| C(2)-C(3)-H(3B)  | 117.5    | C(13)-C(14)-H(14)   | 119.5    | H(22A)-C(22)-H(22B) | 108.1      |
| H(3A)-C(3)-H(3B) | 114.5    | C(14)-C(15)-C(16)   | 121.1(6) | C(22)-C(23)-H(23A)  | 109.5      |
| C(5)-C(4)-C(9)   | 118.8(3) | C(14)-C(15)-H(15)   | 119.4    | C(22)-C(23)-H(23B)  | 109.5      |
| C(5)-C(4)-C(1)   | 120.0(3) | C(16)-C(15)-H(15)   | 119.4    | H(23A)-C(23)-H(23B) | 109.5      |
| C(9)-C(4)-C(1)   | 121.2(3) | C(15)-C(16)-C(17)   | 119.6(7) | C(22)-C(23)-H(23C)  | 109.5      |
| C(4)-C(5)-C(6)   | 120.8(4) | C(15)-C(16)-H(16)   | 120.2    | H(23A)-C(23)-H(23C) | 109.5      |
| C(4)-C(5)-H(5)   | 119.6    | C(17)-C(16)-H(16)   | 120.2    | H(23B)-C(23)-H(23C) | 109.5      |
| C(6)-C(5)-H(5)   | 119.6    | C(12)-C(17)-C(16)   | 119.2(7) | C(10)-N(1)-C(2)     | 120.9(3)   |
| C(7)-C(6)-C(5)   | 119.3(4) | C(12)-C(17)-H(17)   | 120.4    | C(10)-N(1)-H(1)     | 119.5      |
| C(7)-C(6)-H(6)   | 120.3    | C(16)-C(17)-H(17)   | 120.4    | C(2)-N(1)-H(1)      | 119.5      |
| C(5)-C(6)-H(6)   | 120.3    | O(3)-C(18)-O(4)     | 124.5(4) | C(10)-O(2)-C(11)    | 114.7(3)   |
| C(6)-C(7)-C(8)   | 121.3(4) | O(3)-C(18)-C(1)     | 124.7(4) | C(18)-O(4)-C(19)    | 114.1(5)   |
| C(6)-C(7)-Br(1)  | 118.5(4) | O(4)-C(18)-C(1)     | 110.8(3) | C(22)-O(6)-P(002)   | 120.4(4)   |
| C(8)-C(7)-Br(1)  | 120.2(4) | O(4)-C(19)-H(19A)   | 109.5    | C(20)-O(7)-P(002)   | 122.0(3)   |
| C(7)-C(8)-C(9)   | 119.2(4) | O(4)-C(19)-H(19B)   | 109.5    | O(5)-P(002)-O(6)    | 115.99(18) |
| C(7)-C(8)-H(8)   | 120.4    | H(19A)-C(19)-H(19B) | 109.5    | O(5)-P(002)-O(7)    | 113.65(17) |
| C(9)-C(8)-H(8)   | 120.4    | O(4)-C(19)-H(19C)   | 109.5    | O(6)-P(002)-O(7)    | 102.55(18) |
| C(8)-C(9)-C(4)   | 120.5(4) | H(19A)-C(19)-H(19C) | 109.5    | O(5)-P(002)-C(2)    | 112.83(16) |
| C(8)-C(9)-H(9)   | 119.8    | H(19B)-C(19)-H(19C) | 109.5    | O(6)-P(002)-C(2)    | 101.93(16) |
| C(4)-C(9)-H(9)   | 119.8    | O(7)-C(20)-C(21)    | 108.8(6) | O(7)-P(002)-C(2)    | 108.77(15) |
| O(1)-C(10)-N(1)  | 126.1(3) |                     |          |                     |            |

**Table 3:** Bond lengths (Å)

|              |           |              |           |
|--------------|-----------|--------------|-----------|
| C(1)-C(3)    | 1.495(5)  | C(14)-C(15)  | 1.326(12) |
| C(1)-C(4)    | 1.499(5)  | C(14)-H(14)  | 0.93      |
| C(1)-C(18)   | 1.512(5)  | C(15)-C(16)  | 1.341(12) |
| C(1)-C(2)    | 1.568(4)  | C(15)-H(15)  | 0.93      |
| C(2)-N(1)    | 1.425(4)  | C(16)-C(17)  | 1.426(9)  |
| C(2)-C(3)    | 1.509(4)  | C(16)-H(16)  | 0.93      |
| C(2)-P(002)  | 1.818(3)  | C(17)-H(17)  | 0.93      |
| C(3)-H(3A)   | 0.97      | C(18)-O(3)   | 1.188(6)  |
| C(3)-H(3B)   | 0.97      | C(18)-O(4)   | 1.342(6)  |
| C(4)-C(5)    | 1.382(5)  | C(19)-O(4)   | 1.442(7)  |
| C(4)-C(9)    | 1.390(5)  | C(19)-H(19A) | 0.96      |
| C(5)-C(6)    | 1.382(6)  | C(19)-H(19B) | 0.96      |
| C(5)-H(5)    | 0.93      | C(19)-H(19C) | 0.96      |
| C(6)-C(7)    | 1.364(7)  | C(20)-O(7)   | 1.450(7)  |
| C(6)-H(6)    | 0.93      | C(20)-C(21)  | 1.505(10) |
| C(7)-C(8)    | 1.376(7)  | C(20)-H(20A) | 0.97      |
| C(7)-Br(1)   | 1.904(4)  | C(20)-H(20B) | 0.97      |
| C(8)-C(9)    | 1.383(7)  | C(21)-H(21A) | 0.96      |
| C(8)-H(8)    | 0.93      | C(21)-H(21B) | 0.96      |
| C(9)-H(9)    | 0.93      | C(21)-H(21C) | 0.96      |
| C(10)-O(1)   | 1.206(4)  | C(22)-C(23)  | 1.393(13) |
| C(10)-N(1)   | 1.349(4)  | C(22)-O(6)   | 1.450(6)  |
| C(10)-O(2)   | 1.355(4)  | C(22)-H(22A) | 0.97      |
| C(11)-O(2)   | 1.442(5)  | C(22)-H(22B) | 0.97      |
| C(11)-C(12)  | 1.508(6)  | C(23)-H(23A) | 0.96      |
| C(11)-H(11A) | 0.97      | C(23)-H(23B) | 0.96      |
| C(11)-H(11B) | 0.97      | C(23)-H(23C) | 0.96      |
| C(12)-C(17)  | 1.372(9)  | N(1)-H(1)    | 0.86      |
| C(12)-C(13)  | 1.381(10) | O(5)-P(002)  | 1.467(3)  |
| C(13)-C(14)  | 1.373(10) | O(6)-P(002)  | 1.569(3)  |
| C(13)-H(13)  | 0.93      | O(7)-P(002)  | 1.569(3)  |

**Table 4:** Anisotropic displacement parameters ( $\text{\AA}^2 \times 10^3$ ) The anisotropic displacement factor exponent takes the form:  $-2 \pi^2 [ h^2 a^{*2} U_{11} + \dots + 2 h k a^* b^* U_{12} ]$

|        | U11    | U22     | U33     | U23     | U13    | U12    |
|--------|--------|---------|---------|---------|--------|--------|
| C(1)   | 36(1)  | 48(2)   | 51(2)   | -5(1)   | 1(1)   | 1(1)   |
| C(2)   | 39(1)  | 46(2)   | 41(1)   | -2(1)   | -1(1)  | 0(1)   |
| C(3)   | 45(2)  | 51(2)   | 50(2)   | 3(1)    | -8(1)  | 0(1)   |
| C(4)   | 36(1)  | 58(2)   | 51(2)   | -1(1)   | 2(1)   | 2(1)   |
| C(5)   | 38(2)  | 79(2)   | 64(2)   | 11(2)   | -6(1)  | -7(2)  |
| C(6)   | 43(2)  | 93(3)   | 84(3)   | 24(2)   | -1(2)  | -13(2) |
| C(7)   | 53(2)  | 88(3)   | 69(2)   | 15(2)   | 13(2)  | 4(2)   |
| C(8)   | 55(2)  | 112(4)  | 52(2)   | 5(2)    | 2(2)   | 3(2)   |
| C(9)   | 43(2)  | 96(3)   | 51(2)   | -7(2)   | -1(1)  | -7(2)  |
| C(10)  | 39(1)  | 49(2)   | 46(1)   | 0(1)    | 1(1)   | -4(1)  |
| C(11)  | 106(4) | 69(3)   | 97(3)   | 33(2)   | -55(3) | -29(3) |
| C(12)  | 83(3)  | 72(3)   | 78(3)   | 30(2)   | -41(2) | -27(2) |
| C(13)  | 102(4) | 88(3)   | 102(4)  | 22(3)   | 6(3)   | -15(3) |
| C(14)  | 129(6) | 85(4)   | 132(6)  | 8(4)    | 0(5)   | 1(4)   |
| C(15)  | 105(4) | 75(3)   | 110(4)  | 29(3)   | -32(4) | -16(3) |
| C(16)  | 121(5) | 114(5)  | 87(4)   | 49(4)   | -25(4) | -36(4) |
| C(17)  | 116(5) | 100(4)  | 70(3)   | 19(3)   | -16(3) | -25(4) |
| C(18)  | 48(2)  | 51(2)   | 72(2)   | -9(2)   | 8(2)   | 3(1)   |
| C(19)  | 178(8) | 52(3)   | 155(7)  | 12(3)   | -30(6) | -11(4) |
| C(20)  | 88(3)  | 67(3)   | 96(4)   | -14(2)  | -12(3) | -11(2) |
| C(21)  | 83(4)  | 110(5)  | 216(10) | 11(6)   | -56(6) | -33(4) |
| C(22)  | 81(4)  | 154(6)  | 108(4)  | 64(5)   | 21(3)  | -7(4)  |
| C(23)  | 129(7) | 284(16) | 149(8)  | 133(10) | 12(6)  | -42(9) |
| Br(1)  | 93(1)  | 128(1)  | 89(1)   | 43(1)   | 19(1)  | -7(1)  |
| N(1)   | 46(1)  | 42(1)   | 45(1)   | -2(1)   | -5(1)  | -3(1)  |
| O(1)   | 53(1)  | 58(1)   | 59(1)   | -2(1)   | -11(1) | -11(1) |
| O(2)   | 62(2)  | 51(1)   | 57(1)   | 10(1)   | -16(1) | -9(1)  |
| O(3)   | 109(3) | 65(2)   | 80(2)   | -26(2)  | 13(2)  | -4(2)  |
| O(4)   | 91(2)  | 50(2)   | 94(2)   | 5(1)    | -14(2) | 3(2)   |
| O(5)   | 53(1)  | 58(1)   | 73(2)   | -1(1)   | 19(1)  | 7(1)   |
| O(6)   | 64(2)  | 84(2)   | 63(2)   | 19(1)   | 9(1)   | -6(2)  |
| O(7)   | 49(1)  | 50(1)   | 88(2)   | -11(1)  | 3(1)   | -5(1)  |
| P(002) | 44(1)  | 45(1)   | 54(1)   | 0(1)    | 9(1)   | 0(1)   |

**Table 5:** Torsion angles (°)

|                         |           |                         |           |
|-------------------------|-----------|-------------------------|-----------|
| C(3)-C(1)-C(2)-N(1)     | -103.2(3) | C(11)-C(12)-C(17)-C(16) | -179.7(6) |
| C(4)-C(1)-C(2)-N(1)     | 6.8(4)    | C(15)-C(16)-C(17)-C(12) | 0.7(10)   |
| C(18)-C(1)-C(2)-N(1)    | 148.2(3)  | C(3)-C(1)-C(18)-O(3)    | -175.6(4) |
| C(4)-C(1)-C(2)-C(3)     | 110.0(3)  | C(4)-C(1)-C(18)-O(3)    | 35.1(5)   |
| C(18)-C(1)-C(2)-C(3)    | -108.5(4) | C(2)-C(1)-C(18)-O(3)    | -107.4(5) |
| C(3)-C(1)-C(2)-P(002)   | 107.2(3)  | C(3)-C(1)-C(18)-O(4)    | 5.1(5)    |
| C(4)-C(1)-C(2)-P(002)   | -142.7(3) | C(4)-C(1)-C(18)-O(4)    | -144.2(3) |
| C(18)-C(1)-C(2)-P(002)  | -1.3(4)   | C(2)-C(1)-C(18)-O(4)    | 73.3(4)   |
| C(4)-C(1)-C(3)-C(2)     | -105.1(3) | O(1)-C(10)-N(1)-C(2)    | -8.7(5)   |
| C(18)-C(1)-C(3)-C(2)    | 107.5(3)  | O(2)-C(10)-N(1)-C(2)    | 172.3(3)  |
| N(1)-C(2)-C(3)-C(1)     | 106.4(3)  | C(3)-C(2)-N(1)-C(10)    | -149.5(3) |
| P(002)-C(2)-C(3)-C(1)   | -113.1(3) | C(1)-C(2)-N(1)-C(10)    | -84.9(4)  |
| C(3)-C(1)-C(4)-C(5)     | -32.5(5)  | P(002)-C(2)-N(1)-C(10)  | 67.6(3)   |
| C(18)-C(1)-C(4)-C(5)    | 116.5(4)  | O(1)-C(10)-O(2)-C(11)   | -1.3(6)   |
| C(2)-C(1)-C(4)-C(5)     | -100.3(4) | N(1)-C(10)-O(2)-C(11)   | 177.8(4)  |
| C(3)-C(1)-C(4)-C(9)     | 145.9(4)  | C(12)-C(11)-O(2)-C(10)  | 173.8(5)  |
| C(18)-C(1)-C(4)-C(9)    | -65.0(5)  | O(3)-C(18)-O(4)-C(19)   | 4.2(8)    |
| C(2)-C(1)-C(4)-C(9)     | 78.2(4)   | C(1)-C(18)-O(4)-C(19)   | -176.5(6) |
| C(9)-C(4)-C(5)-C(6)     | -1.4(6)   | C(23)-C(22)-O(6)-P(002) | -176.6(9) |
| C(1)-C(4)-C(5)-C(6)     | 177.1(4)  | C(21)-C(20)-O(7)-P(002) | 105.4(6)  |
| C(4)-C(5)-C(6)-C(7)     | -1.4(8)   | C(22)-O(6)-P(002)-O(5)  | -48.3(6)  |
| C(5)-C(6)-C(7)-C(8)     | 3.1(8)    | C(22)-O(6)-P(002)-O(7)  | 76.1(6)   |
| C(5)-C(6)-C(7)-Br(1)    | -176.9(4) | C(22)-O(6)-P(002)-C(2)  | -171.3(5) |
| C(6)-C(7)-C(8)-C(9)     | -1.8(8)   | C(20)-O(7)-P(002)-O(5)  | -30.6(4)  |
| Br(1)-C(7)-C(8)-C(9)    | 178.2(4)  | C(20)-O(7)-P(002)-O(6)  | -156.6(4) |
| C(7)-C(8)-C(9)-C(4)     | -1.2(8)   | C(20)-O(7)-P(002)-C(2)  | 96.0(4)   |
| C(5)-C(4)-C(9)-C(8)     | 2.8(7)    | N(1)-C(2)-P(002)-O(5)   | 3.3(3)    |
| C(1)-C(4)-C(9)-C(8)     | -175.7(4) | C(3)-C(2)-P(002)-O(5)   | -137.1(3) |
| O(2)-C(11)-C(12)-C(17)  | -107.1(6) | C(1)-C(2)-P(002)-O(5)   | 153.3(3)  |
| O(2)-C(11)-C(12)-C(13)  | 74.6(7)   | N(1)-C(2)-P(002)-O(6)   | 128.4(2)  |
| C(17)-C(12)-C(13)-C(14) | 2.1(10)   | C(3)-C(2)-P(002)-O(6)   | -12.0(3)  |
| C(11)-C(12)-C(13)-C(14) | -179.6(7) | C(1)-C(2)-P(002)-O(6)   | -81.6(3)  |
| C(12)-C(13)-C(14)-C(15) | -2.2(13)  | N(1)-C(2)-P(002)-O(7)   | -123.8(2) |
| C(13)-C(14)-C(15)-C(16) | 1.5(13)   | C(3)-C(2)-P(002)-O(7)   | 95.8(3)   |
| C(14)-C(15)-C(16)-C(17) | -0.8(11)  | C(1)-C(2)-P(002)-O(7)   | 26.2(3)   |
| C(13)-C(12)-C(17)-C(16) | -1.4(9)   |                         |           |

**Table 6:** Calculated reflections from PowderCell\*

| h | k | l | 2 $\theta$ /° | d/Å | I/rel. | F(hkl) |
|---|---|---|---------------|-----|--------|--------|
|---|---|---|---------------|-----|--------|--------|

| h | k | l | 2 $\theta$ /° | d/Å   | I/rel. | F(hkl) |
|---|---|---|---------------|-------|--------|--------|
| 0 | 1 | 1 | 7.69          | 11.49 | 100.00 | 118.99 |
| 0 | 0 | 2 | 7.91          | 11.17 | 6.18   | 43.04  |
| 0 | 1 | 2 | 10.30         | 8.58  | 8.35   | 46.18  |
| 1 | 1 | 0 | 12.20         | 7.25  | 16.72  | 77.50  |
| 1 | 1 | 1 | 12.83         | 6.90  | 25.20  | 70.80  |
| 1 | 0 | 2 | 12.96         | 6.83  | 23.25  | 97.19  |
| 0 | 1 | 3 | 13.59         | 6.51  | 3.33   | 38.61  |
| 0 | 2 | 2 | 15.41         | 5.75  | 50.40  | 170.65 |
| 1 | 0 | 3 | 15.71         | 5.64  | 35.41  | 145.90 |
| 1 | 2 | 0 | 16.75         | 5.29  | 23.16  | 125.94 |
| 1 | 1 | 3 | 17.05         | 5.20  | 78.79  | 167.35 |
| 0 | 1 | 4 | 17.19         | 5.16  | 19.57  | 118.89 |
| 1 | 2 | 1 | 17.21         | 5.15  | 16.68  | 77.73  |
| 0 | 2 | 3 | 17.79         | 4.98  | 3.38   | 51.19  |
| 1 | 2 | 2 | 18.54         | 4.78  | 5.11   | 46.44  |
| 1 | 1 | 4 | 20.05         | 4.42  | 3.99   | 44.49  |
| 1 | 2 | 3 | 20.58         | 4.31  | 37.31  | 139.76 |
| 2 | 0 | 0 | 20.59         | 4.31  | 15.35  | 179.33 |
| 0 | 2 | 4 | 20.69         | 4.29  | 2.76   | 54.04  |
| 2 | 0 | 1 | 20.97         | 4.23  | 6.73   | 85.61  |
| 0 | 3 | 2 | 21.41         | 4.15  | 3.87   | 66.31  |
| 2 | 1 | 1 | 22.00         | 4.04  | 8.68   | 72.26  |
| 2 | 0 | 2 | 22.08         | 4.02  | 15.87  | 138.73 |
| 1 | 0 | 5 | 22.39         | 3.97  | 6.58   | 90.60  |

| h | k | l | 2 $\theta$ /° | d/Å  | I/rel. | F(hkl) |
|---|---|---|---------------|------|--------|--------|
| 1 | 3 | 0 | 22.40         | 3.97 | 10.72  | 115.68 |
| 1 | 3 | 1 | 22.76         | 3.90 | 15.73  | 100.74 |
| 2 | 1 | 2 | 23.07         | 3.85 | 36.34  | 155.35 |
| 1 | 2 | 4 | 23.14         | 3.84 | 40.74  | 164.98 |
| 0 | 3 | 3 | 23.20         | 3.83 | 9.21   | 111.24 |
| 0 | 2 | 5 | 23.92         | 3.72 | 5.59   | 89.48  |
| 2 | 2 | 0 | 24.54         | 3.63 | 4.01   | 77.87  |
| 2 | 1 | 3 | 24.75         | 3.59 | 6.57   | 71.09  |
| 0 | 1 | 6 | 24.80         | 3.59 | 4.28   | 81.35  |
| 2 | 2 | 1 | 24.86         | 3.58 | 6.87   | 73.03  |
| 1 | 3 | 3 | 25.43         | 3.50 | 5.31   | 65.78  |
| 0 | 3 | 4 | 25.52         | 3.49 | 2.03   | 57.72  |
| 2 | 2 | 2 | 25.82         | 3.45 | 5.39   | 67.32  |
| 1 | 0 | 6 | 26.04         | 3.42 | 6.09   | 102.14 |
| 2 | 2 | 3 | 27.34         | 3.26 | 8.71   | 90.90  |
| 1 | 3 | 4 | 27.56         | 3.23 | 3.57   | 58.70  |
| 0 | 3 | 5 | 28.23         | 3.16 | 5.11   | 101.88 |
| 0 | 1 | 7 | 28.73         | 3.10 | 5.18   | 104.54 |
| 2 | 3 | 1 | 29.04         | 3.07 | 9.62   | 101.88 |
| 0 | 4 | 3 | 29.21         | 3.05 | 7.07   | 124.30 |
| 1 | 2 | 6 | 29.31         | 3.05 | 3.54   | 62.41  |
| 2 | 2 | 4 | 29.35         | 3.04 | 5.25   | 76.14  |
| 2 | 1 | 5 | 29.53         | 3.02 | 10.50  | 108.35 |
| 1 | 4 | 2 | 29.69         | 3.01 | 13.08  | 121.63 |

Source: Cu-K $\alpha_1$  ( $\lambda = 1.540598 \text{ \AA}$ )

Condition on reflections:  $l \geq 2$

Range (2 $\theta$ ): From 3° to 30°

\*PowderCell for Windows (version 2.4) by Kraus W. & Nolze G., Federal institute for materials Research and testing, Rudower Chausse 5, 12489 Berlin Germany.

## 10. X-ray crystallographic data of 28 (CCDC 2350766)

### DATA COLLECTION

The crystal structure of **AT018** [ $\text{C}_{24}\text{H}_{29}\text{BrNO}_7\text{P}$ ] has been determined from single crystal X-Ray diffraction. The chosen crystal was stuck on a glass fibre and mounted on a kappa goniometer of a Bruker D8-VENTURE diffractometer equipped with a PHOTON area detector. A series of exposures were recorded see in annexe 1,

The cell parameters and the orientation matrix of the crystal were preliminary determined by using APEX Software<sup>1</sup>. Data integration and global cell refinement were performed with SAINT Software<sup>2</sup>. Intensities were corrected for Lorentz, polarisation, decay and absorption effects (SADABS Software<sup>2</sup>) and reduced to  $F_o^2$ . The program package WinGX<sup>3</sup> was used for space group determination, structure solution and refinement.

### DATA REFINEMENT

The standard space group  $P2_12_12_1$  ( $n^\circ 19$ ) was determined from systematic extinctions and relative  $F_o^2$  of equivalent reflections. The structure was solved by direct methods<sup>4</sup>. Anisotropic displacement parameters were refined for all non-hydrogen atoms. Every Hydrogen atoms were located from subsequent difference Fourier syntheses and placed with geometrical constraints (SHELXL<sup>4</sup>). The final cycle of full-matrix least-square refinement on  $F^2$  was based on 5848 observed reflections and 330 variable parameters and converged with unweighted and weighted agreement factors of:

$R1 = 0.0509$ ,  $wR2 = 0.1496$  for 5023 reflections with  $|I > 2\sigma|$  and  $R1 = 0.0571$ ,  $wR2 = 0.1575$  for all data.

The refinement data are summarized in annexe 1 table 2



## CRYSTALLOGRAPHIC DATA AND STRUCTURAL DESCRIPTION

### *Crystallographic data*

The crystal data are collected in Table 1. The full crystallographic parameters (atomic coordinates, bond length, angles and anisotropic displacements) are reported in annexe 2.

**Table 1: Crystal data**

|                                                                         |                                                       |
|-------------------------------------------------------------------------|-------------------------------------------------------|
| Chemical Formula                                                        | C <sub>24</sub> H <sub>29</sub> BrNO <sub>7</sub> P   |
| Molecular Weight / <i>g.mol</i> <sup>-1</sup>                           | 554.3                                                 |
| Crystal System                                                          | Orthorhombic                                          |
| Space Group                                                             | <i>P</i> 2 <sub>1</sub> 2 <sub>1</sub> 2 <sub>1</sub> |
| Z , Z' (asymmetric units per unit cell)                                 | 4,1                                                   |
| a / Å                                                                   | 8.6898(2)                                             |
| b / Å                                                                   | 14.0318(4)                                            |
| c / Å                                                                   | 22.1254(6)                                            |
| α / °                                                                   | 90                                                    |
| β / °                                                                   | 90                                                    |
| γ / °                                                                   | 90                                                    |
| V / Å <sup>3</sup>                                                      | 2697.83(1)                                            |
| d <sub>calc</sub> / <i>g.cm</i> <sup>-3</sup>                           | 1.365                                                 |
| F(000) / e <sup>-</sup>                                                 | 1144                                                  |
| Absolute structure parameter                                            | 0.044(9)                                              |
| Absorption coefficient μ (MoKα <sub>1</sub> ) / <i>mm</i> <sup>-1</sup> | 2.989                                                 |

### *Structural description*

The Asymmetric unit is composed of one molecule of C<sub>24</sub>H<sub>29</sub>BrNO<sub>7</sub>P (Figures 1 and 2). One of the ethyl chain is disordered (light/medium grey on figures 1 and 2) with a statistical occupancy factor of 63/37% (dark/light grey). The stereo genic centres are C1 and C3 , that exhibit a S and R configuration respectively.

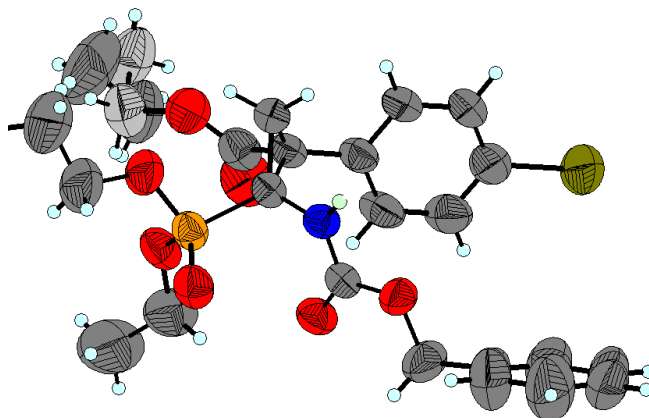

Figure 1: Asymmetric unit in thermal ellipsoidal representation (50% of probability).  
One of the ethyl chain is disordered with 37/63 % of s.o.f. (light/medium grey)

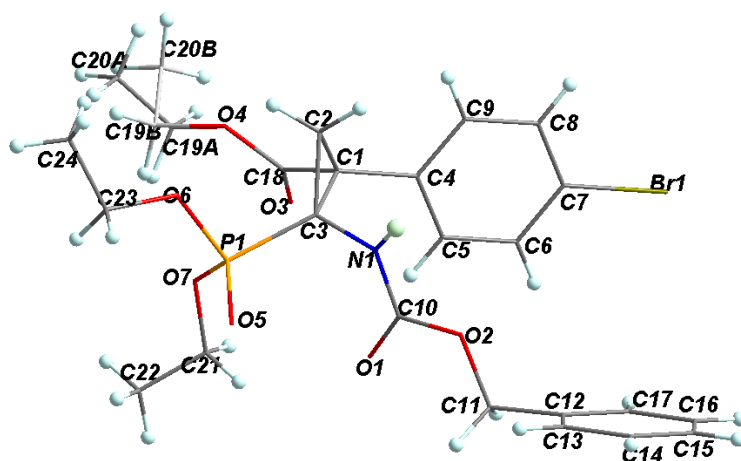

Figure 2: Asymmetric unit with atom labels.  
The Stereogenic centres C1 and C3 are S and R respectively.

Table 1: Hydrogen bond table

| D-H...A                | d(D-H) | d(H...A) | d(D...A) | <(DHA) |
|------------------------|--------|----------|----------|--------|
| N(1)-<br>H(1)...O(5)#1 | 0.86   | 1.99     | 2.804(4) | 157.3  |

Symmetry transformations used to generate equivalent atoms: #1  $x+1/2, -y+1/2, -z+1$

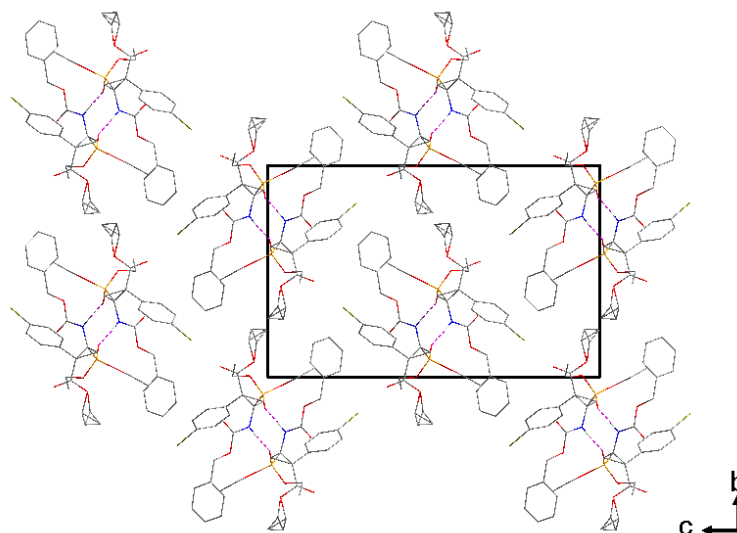

Figure 3 : Projection along a axis

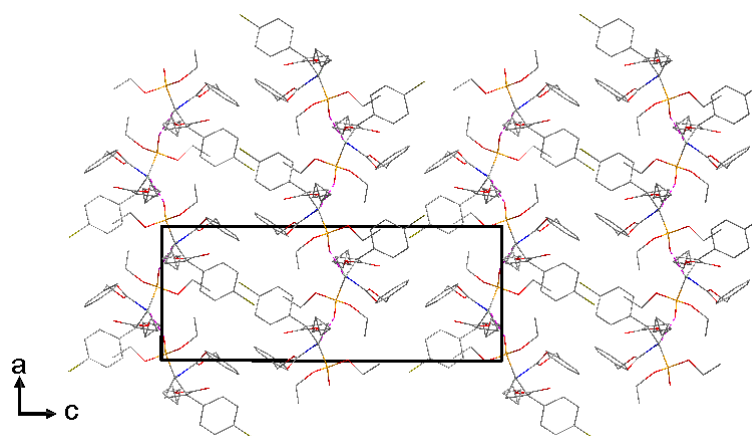

Figure 4: Projection along b axis

Softwares :

(1)- APEX. V2022.10-1

(2)- SAINT V8.40B Bruker AXS LLC.219

- SADABS – 2016/2 – Bruker AXS area detector scaling and absorption correction

(3)- WinGX: Version 2023.1: An integrated system of Windows Programs for the solution, refinement and analysis of Single Crystal X-Ray Diffraction Data, By LouisJ. Farrugia, Dept. of chemistry, University of Glasgow. L. J. Farrugia (2012) J. Appl. Cryst. 45, 849-854.

(4)-include in WinGX suite :

- SIR 92: A. Altomare, G. Cascarano, C. Giacovazzo and A. Guagliardi, J. Appl. Crystallogr., 1994, 27, 435.;

- SHELX & SHELXTL program: G. M. Sheldrick, Acta Crystallogr., Sect. A: Found. Crystallogr., 2008, 64, 112-122..

(6)-PowderCell for Windows (version 2.4) by Kraus W. & Nolze G., Federal institute for materials Research and testing, Rudower Chausse 5, 12489 Berlin Germany.

**ANNEXE 1 :**

**- Table 1 : DATA COLLECTION FOR AT018 -**

**Scan parameters : D=40.068mm,  $\lambda = 1.54184 \text{ \AA}$**

| Axis  | 2 $\theta$ /° | $\omega$ /° | $\phi$ /°   | $\chi$ /° | Width/° | Frames | time |
|-------|---------------|-------------|-------------|-----------|---------|--------|------|
| Phi   | 55            | 0           | 0           | 54.74     | 1       | 180    | 1    |
| Phi   | 55            | 0           | 180         | 54.74     | 1       | 180    | 1    |
| Omega | -48.14        | -<br>153.55 | 51          | 44.5      | 0.5     | 216    | 1    |
| Omega | 109.52        | 107.37      | 120         | -44.5     | 0.5     | 216    | 5    |
| Omega | 109.52        | -5.2        | 160         | 65.5      | 0.5     | 245    | 5    |
| Omega | -48.14        | 40.14       | 0           | -65.5     | 0.5     | 192    | 1    |
| Omega | 109.52        | -<br>144.63 | 40          | -44.5     | 0.5     | 216    | 5    |
| Omega | 109.52        | 117.3       | 40          | 65.5      | 0.5     | 245    | 5    |
| Omega | 109.52        | 107.37      | 0           | -44.5     | 0.5     | 216    | 5    |
| Omega | 109.52        | 107.37      | -80         | -44.5     | 0.5     | 216    | 5    |
| Omega | 109.52        | 117.3       | -40         | 65.5      | 0.5     | 245    | 5    |
| Omega | -48.14        | -<br>153.55 | -54         | 44.5      | 0.5     | 216    | 1    |
| Omega | 109.52        | 117.3       | 0           | 65.5      | 0.5     | 245    | 5    |
| Omega | 109.52        | 107.37      | -120        | -44.5     | 0.5     | 216    | 5    |
| Omega | 109.52        | -<br>144.63 | -40         | -44.5     | 0.5     | 216    | 5    |
| Omega | -48.14        | -<br>153.55 | 0           | 44.5      | 0.5     | 216    | 1    |
| Omega | 109.52        | 117.3       | -80         | 65.5      | 0.5     | 245    | 5    |
| Omega | 109.52        | -1.24       | 324         | 68.5      | 0.5     | 162    | 5    |
| Omega | 109.52        | -1.24       | 180         | 68.5      | 0.5     | 162    | 5    |
| Omega | 109.52        | -1.24       | 108         | 68.5      | 0.5     | 162    | 5    |
| Phi   | 109.52        | 14.28       | -58.34      | 22        | 0.5     | 490    | 5    |
| Omega | 109.52        | 107.37      | 160         | -44.5     | 0.5     | 216    | 5    |
| Omega | 109.52        | -<br>144.63 | 80          | -44.5     | 0.5     | 216    | 5    |
| Omega | 109.52        | 117.3       | 120         | 65.5      | 0.5     | 245    | 5    |
| Omega | 109.52        | -5.2        | -160        | 65.5      | 0.5     | 245    | 5    |
| Phi   | -48.14        | -45.55      | 117.85      | 44.5      | 0.5     | 391    | 1    |
| Phi   | -48.14        | -39.51      | -<br>173.65 | 22        | 0.5     | 391    | 1    |

|                                                                  |                                       |
|------------------------------------------------------------------|---------------------------------------|
| Unique reflections [ $F_o > 4.0 \sigma(F_o)$ ]                   | 5848                                  |
| $\theta$ range / °                                               | 3.730 to 81.236                       |
| hkl range                                                        | -10<=h<=8, -17<=k<=17, -<br>28<=l<=28 |
| $R_{int} = \Sigma[ F_o^2 - F_o^2(\text{mean}) ] / \Sigma[F_o^2]$ | 0.058                                 |
| Completeness to $\theta = 67.684$ / %                            | 99.9                                  |

**- Table 2 : REFINEMENT DATA FOR AT018**

|                                                           |                           |
|-----------------------------------------------------------|---------------------------|
| Number of reflections (n) (with $F_o > 4.0 \sigma(F_o)$ ) | 5023                      |
| Number of refined parameters (p) / restraints             | 330 / 0                   |
| Final R indices [ $I > 2\sigma(I)$ ]                      | R1 = 0.0509, wR2 = 0.1496 |
| R indices (all data)                                      | R1 = 0.0571, wR2 = 0.1575 |
| Goodness of Fit indicator (Restrained GooF)               | 0.991                     |
| Maximum peak in Final Difference Map / $e\text{\AA}^{-3}$ | 0.647                     |
| Maximum hole in Final Difference Map / $e\text{\AA}^{-3}$ | -0.458                    |

$$R_1 = \Sigma (||F_o| - |F_c||) / \Sigma |F_o|$$

$$wR_2 = [ \Sigma [ w (F_o^2 - F_c^2)^2 ] / \Sigma [ w (F_o^2)^2 ] ]^{1/2}$$

$$\text{GooF} = [ \Sigma [ w (F_o^2 - F_c^2)^2 ] / (n - p) ]^{1/2}$$

## ANNEXE 2 : CRYSTALLOGRAPHIC DATA

Table 1a: Atomic coordinates ( $\times 10^4$ ) and equivalent isotropic displacement parameters ( $\text{\AA}^2 \times 10^3$ ).

U(eq) is defined as one third of the trace of the orthogonalized Uij tensor

|        | x        | y             | z        | U(eq)   |
|--------|----------|---------------|----------|---------|
| C(1)   | 7559(4)  | 866(3)        | 5749(2)  | 59(1)   |
| C(2)   | 7772(4)  | 1164(3)       | 5106(2)  | 62(1)   |
| C(3)   | 6254(4)  | 1400(3)       | 5395(2)  | 55(1)   |
| C(4)   | 8359(4)  | 1419(3)       | 6241(2)  | 63(1)   |
| C(5)   | 7691(5)  | 1534(5)       | 6806(2)  | 78(1)   |
| C(6)   | 8428(6)  | 2071(5)       | 7246(2)  | 89(2)   |
| C(7)   | 9819(6)  | 2480(5)       | 7120(3)  | 86(1)   |
| C(8)   | 10521(5) | 2339(5)       | 6575(3)  | 87(1)   |
| C(9)   | 9784(5)  | 1814(4)       | 6136(2)  | 74(1)   |
| C(10)  | 5196(4)  | 2639(3)       | 6019(2)  | 56(1)   |
| C(11)  | 4392(9)  | 3962(4)       | 6597(3)  | 102(2)  |
| C(12)  | 4819(8)  | 4978(4)       | 6698(3)  | 90(2)   |
| C(13)  | 4286(12) | 5662(6)       | 6292(5)  | 126(3)  |
| C(14)  | 4629(15) | 6608(7)       | 6389(6)  | 152(4)  |
| C(15)  | 5478(12) | 6870(7)       | 6865(5)  | 131(3)  |
| C(16)  | 6021(13) | 6236(8)       | 7264(5)  | 140(4)  |
| C(17)  | 5694(13) | 5268(6)       | 7183(4)  | 123(3)  |
| C(18)  | 7315(6)  | -169(3)       | 5898(3)  | 76(1)   |
| C(19A) | 7160(30) | -<br>1719(14) | 5559(13) | 120(7)  |
| C(20A) | 7400(50) | -<br>2223(11) | 5027(15) | 200(18) |
| C(19B) | 6910(40) | -<br>1660(30) | 5320(18) | 102(9)  |
| C(20B) | 8250(40) | -<br>2272(16) | 5475(15) | 124(11) |
| C(22)  | 1830(20) | -<br>587(10)  | 5970(12) | 270(14) |
| C(21)  | 3133(10) | -11(5)        | 6050(4)  | 110(2)  |
| C(23)  | 3961(10) | 27(7)         | 4088(4)  | 125(3)  |
| C(24)  | 4781(17) | -<br>413(11)  | 3582(5)  | 177(6)  |
| Br(1)  | 10819(1) | 3263(1)       | 7706(1)  | 118(1)  |
| N(1)   | 6054(4)  | 2383(2)       | 5545(1)  | 56(1)   |
| O(1)   | 4389(4)  | 2119(2)       | 6318(1)  | 68(1)   |
| O(2)   | 5322(4)  | 3593(2)       | 6110(2)  | 69(1)   |

|      |         |         |         |        |
|------|---------|---------|---------|--------|
| O(3) | 7053(7) | -471(3) | 6390(2) | 105(1) |
| O(4) | 7433(5) | -709(3) | 5400(2) | 96(1)  |
| O(5) | 3209(4) | 1494(2) | 5074(2) | 76(1)  |
| O(6) | 5058(5) | 364(3)  | 4520(2) | 88(1)  |
| O(7) | 4149(4) | -55(2)  | 5532(2) | 77(1)  |
| P(1) | 4503(1) | 831(1)  | 5127(1) | 62(1)  |



**Table 1b:** Hydrogen coordinates ( $\times 10^4$ ) and equivalent isotropic displacement parameters ( $\text{\AA}^2 \times 10^3$ ). U(eq) is defined as one third of the trace of the orthogonalized  $U_{ij}$  tensor

|        | x     | y     | z    | U(eq) |
|--------|-------|-------|------|-------|
| H(2A)  | 7780  | 666   | 4802 | 74    |
| H(2B)  | 8473  | 1687  | 5027 | 74    |
| H(5)   | 6748  | 1250  | 6890 | 94    |
| H(6)   | 7978  | 2153  | 7624 | 106   |
| H(8)   | 11490 | 2595  | 6501 | 105   |
| H(9)   | 10256 | 1724  | 5763 | 89    |
| H(11A) | 4569  | 3596  | 6962 | 123   |
| H(11B) | 3310  | 3915  | 6493 | 123   |
| H(13)  | 3703  | 5481  | 5958 | 151   |
| H(14)  | 4268  | 7067  | 6122 | 182   |
| H(15)  | 5697  | 7512  | 6921 | 158   |
| H(16)  | 6610  | 6436  | 7591 | 168   |
| H(17)  | 6068  | 4821  | 7456 | 147   |
| H(19A) | 7866  | -1926 | 5871 | 143   |
| H(19B) | 6113  | -1810 | 5702 | 143   |
| H(20A) | 8429  | -2104 | 4884 | 299   |
| H(20B) | 6675  | -2022 | 4728 | 299   |
| H(20C) | 7279  | -2893 | 5103 | 299   |
| H(19C) | 6586  | -1762 | 4906 | 123   |
| H(19D) | 6045  | -1789 | 5586 | 123   |
| H(20D) | 9051  | -2180 | 5182 | 186   |
| H(20E) | 7939  | -2929 | 5475 | 186   |
| H(20F) | 8628  | -2105 | 5869 | 186   |
| H(22A) | 1262  | -370  | 5625 | 405   |
| H(22B) | 1196  | -552  | 6324 | 405   |
| H(22C) | 2150  | -1235 | 5907 | 405   |
| H(21A) | 3686  | -216  | 6407 | 132   |
| H(21B) | 2809  | 643   | 6113 | 132   |
| H(23A) | 3339  | 554   | 3943 | 150   |
| H(23B) | 3284  | -436  | 4276 | 150   |
| H(24A) | 5723  | -690  | 3726 | 265   |
| H(24B) | 5009  | 63    | 3284 | 265   |
| H(24C) | 4149  | -900  | 3406 | 265   |
| H(1)   | 6490  | 2814  | 5327 | 67    |

**Table 2: Bond lengths (Å)**

|                  |           |                   |           |
|------------------|-----------|-------------------|-----------|
| C(1)-C(2)        | 1.494(6)  | C(16)-H(16)       | 0.93      |
| C(1)-C(18)       | 1.504(6)  | C(17)-H(17)       | 0.93      |
| C(1)-C(4)        | 1.507(6)  | C(18)-O(3)        | 1.190(8)  |
| C(1)-C(3)        | 1.568(5)  | C(18)-O(4)        | 1.341(8)  |
| C(2)-C(3)        | 1.503(5)  | C(19A)-<br>C(20A) | 1.39(4)   |
| C(2)-H(2A)       | 0.97      | C(19A)-O(4)       | 1.48(2)   |
| C(2)-H(2B)       | 0.97      | C(19A)-<br>H(19A) | 0.97      |
| C(3)-N(1)        | 1.430(5)  | C(19A)-<br>H(19B) | 0.97      |
| C(3)-P(1)        | 1.818(4)  | C(20A)-<br>H(20A) | 0.9893    |
| C(4)-C(9)        | 1.376(6)  | C(20A)-<br>H(20B) | 0.9905    |
| C(4)-C(5)        | 1.388(6)  | C(20A)-<br>H(20C) | 0.9905    |
| C(5)-C(6)        | 1.388(8)  | C(19B)-O(4)       | 1.42(4)   |
| C(5)-H(5)        | 0.93      | C(19B)-<br>C(20B) | 1.49(5)   |
| C(6)-C(7)        | 1.366(9)  | C(19B)-<br>H(19C) | 0.97      |
| C(6)-H(6)        | 0.93      | C(19B)-<br>H(19D) | 0.97      |
| C(7)-C(8)        | 1.367(8)  | C(20B)-<br>H(20D) | 0.96      |
| C(7)-Br(1)       | 1.908(5)  | C(20B)-<br>H(20E) | 0.96      |
| C(8)-C(9)        | 1.377(7)  | C(20B)-<br>H(20F) | 0.96      |
| C(8)-H(8)        | 0.93      | C(22)-C(21)       | 1.400(17) |
| C(9)-H(9)        | 0.93      | C(22)-<br>H(22A)  | 0.9601    |
| C(10)-O(1)       | 1.210(5)  | C(22)-<br>H(22B)  | 0.9601    |
| C(10)-N(1)       | 1.336(5)  | C(22)-<br>H(22C)  | 0.9601    |
| C(10)-O(2)       | 1.359(5)  | C(21)-O(7)        | 1.448(9)  |
| C(11)-O(2)       | 1.443(6)  | C(21)-<br>H(21A)  | 0.97      |
| C(11)-C(12)      | 1.491(7)  | C(21)-<br>H(21B)  | 0.97      |
| C(11)-<br>H(11A) | 0.97      | C(23)-O(6)        | 1.431(8)  |
| C(11)-<br>H(11B) | 0.97      | C(23)-C(24)       | 1.463(15) |
| C(12)-C(17)      | 1.376(11) | C(23)-<br>H(23A)  | 0.97      |
| C(12)-C(13)      | 1.394(12) | C(23)-<br>H(23B)  | 0.97      |
| C(13)-C(14)      | 1.377(12) | C(24)-<br>H(24A)  | 0.96      |
| C(13)-H(13)      | 0.93      | C(24)-<br>H(24B)  | 0.96      |
| C(14)-C(15)      | 1.337(16) | C(24)-<br>H(24C)  | 0.96      |
| C(14)-H(14)      | 0.93      | N(1)-H(1)         | 0.86      |
| C(15)-C(16)      | 1.339(16) | O(5)-P(1)         | 1.463(3)  |
| C(15)-H(15)      | 0.93      | O(6)-P(1)         | 1.569(4)  |
| C(16)-C(17)      | 1.398(13) | O(7)-P(1)         | 1.563(3)  |

**Table 3: Angles (°)**

|                  |   |          |                     |           |                      |   |          |                     |           |
|------------------|---|----------|---------------------|-----------|----------------------|---|----------|---------------------|-----------|
| C(2)-C(1)-C(18)  | 4 | 119.7(4) | C(9)-C(8)-H(8)      | 120.2     | O(3)-C(18)-C(1)      | 5 | 124.8(5) | C(22)-C(21)-O(7)    | 111.6(10) |
| C(2)-C(1)-C(4)   | 3 | 119.1(3) | C(4)-C(9)-C(8)      | 121.0(5)  | O(4)-C(18)-C(1)      | 4 | 110.8(4) | C(22)-C(21)-H(21A)  | 109.3     |
| C(18)-C(1)-C(4)  | 4 | 113.8(4) | C(4)-C(9)-H(9)      | 119.5     | C(20A)-C(19A)-O(4)   |   | 105(2)   | O(7)-C(21)-H(21A)   | 109.3     |
| C(2)-C(1)-C(3)   |   | 58.7(3)  | C(8)-C(9)-H(9)      | 119.5     | C(20A)-C(19A)-H(19A) |   | 110.9    | C(22)-C(21)-H(21B)  | 109.3     |
| C(18)-C(1)-C(3)  | 3 | 117.9(3) | O(1)-C(10)-N(1)     | 126.3(4)  | O(4)-C(19A)-H(19A)   |   | 110.7    | O(7)-C(21)-H(21B)   | 109.3     |
| C(4)-C(1)-C(3)   | 3 | 116.6(3) | O(1)-C(10)-O(2)     | 124.0(4)  | C(20A)-C(19A)-H(19B) |   | 110.5    | H(21A)-C(21)-H(21B) | 107.9     |
| C(1)-C(2)-C(3)   |   | 63.1(3)  | N(1)-C(10)-O(2)     | 109.7(3)  | O(4)-C(19A)-H(19B)   |   | 110.7    | O(6)-C(23)-C(24)    | 109.0(8)  |
| C(1)-C(2)-H(2A)  |   | 117.4    | O(2)-C(11)-C(12)    | 108.4(4)  | H(19A)-C(19A)-H(19B) |   | 108.8    | O(6)-C(23)-H(23A)   | 109.8     |
| C(3)-C(2)-H(2A)  |   | 117.4    | O(2)-C(11)-H(11A)   | 110       | C(19A)-C(20A)-H(20A) |   | 112.5    | C(24)-C(23)-H(23A)  | 109.9     |
| C(1)-C(2)-H(2B)  |   | 117.4    | C(12)-C(11)-H(11A)  | 110       | C(19A)-C(20A)-H(20B) |   | 112.9    | O(6)-C(23)-H(23B)   | 109.9     |
| C(3)-C(2)-H(2B)  |   | 117.4    | O(2)-C(11)-H(11B)   | 110       | H(20A)-C(20A)-H(20B) |   | 106.1    | C(24)-C(23)-H(23B)  | 109.9     |
| H(2A)-C(2)-H(2B) |   | 114.5    | C(12)-C(11)-H(11B)  | 110       | C(19A)-C(20A)-H(20C) |   | 112.9    | H(23A)-C(23)-H(23B) | 108.3     |
| N(1)-C(3)-C(2)   | 3 | 114.7(3) | H(11A)-C(11)-H(11B) | 108.4     | H(20A)-C(20A)-H(20C) |   | 105.9    | C(23)-C(24)-H(24A)  | 109.5     |
| N(1)-C(3)-C(1)   | 3 | 115.7(3) | C(17)-C(12)-C(13)   | 118.9(7)  | H(20B)-C(20A)-H(20C) |   | 105.9    | C(23)-C(24)-H(24B)  | 109.4     |
| C(2)-C(3)-C(1)   |   | 58.2(3)  | C(17)-C(12)-C(11)   | 122.5(8)  | O(4)-C(19B)-C(20B)   |   | 105(2)   | H(24A)-C(24)-H(24B) | 109.5     |
| N(1)-C(3)-P(1)   | 3 | 113.4(3) | C(13)-C(12)-C(11)   | 118.6(7)  | O(4)-C(19B)-H(19C)   |   | 110.8    | C(23)-C(24)-H(24C)  | 109.5     |
| C(2)-C(3)-P(1)   | 3 | 119.9(3) | C(14)-C(13)-C(12)   | 119.4(9)  | C(20B)-C(19B)-H(19C) |   | 110.8    | H(24A)-C(24)-H(24C) | 109.5     |
| C(1)-C(3)-P(1)   | 3 | 124.0(3) | C(14)-C(13)-H(13)   | 120.3     | O(4)-C(19B)-H(19D)   |   | 110.7    | H(24B)-C(24)-H(24C) | 109.5     |
| C(9)-C(4)-C(5)   | 4 | 118.8(4) | C(12)-C(13)-H(13)   | 120.3     | C(20B)-C(19B)-H(19D) |   | 110.6    | C(10)-N(1)-C(3)     | 120.6(3)  |
| C(9)-C(4)-C(1)   | 4 | 120.0(4) | C(15)-C(14)-C(13)   | 120.5(1)  | H(19C)-C(19B)-H(19D) |   | 108.8    | C(10)-N(1)-H(1)     | 119.7     |
| C(5)-C(4)-C(1)   | 4 | 121.1(4) | C(15)-C(14)-H(14)   | 119.8     | C(19B)-C(20B)-H(20D) |   | 109.4    | C(3)-N(1)-H(1)      | 119.7     |
| C(6)-C(5)-C(4)   | 4 | 120.1(4) | C(13)-C(14)-H(14)   | 119.7     | C(19B)-C(20B)-H(20E) |   | 109.5    | C(10)-O(2)-C(11)    | 114.8(3)  |
| C(6)-C(5)-H(5)   |   | 120      | C(14)-C(15)-C(16)   | 122.0(8)  | H(20D)-C(20B)-H(20E) |   | 109.5    | C(18)-O(4)-C(19B)   | 127.4(18) |
| C(4)-C(5)-H(5)   |   | 119.9    | C(14)-C(15)-H(15)   | 119       | C(19B)-C(20B)-H(20F) |   | 109.6    | C(18)-O(4)-C(19A)   | 109.5(12) |
| C(7)-C(6)-C(5)   | 5 | 119.6(5) | C(16)-C(15)-H(15)   | 119       | H(20D)-C(20B)-H(20F) |   | 109.5    | C(23)-O(6)-P(1)     | 120.3(5)  |
| C(7)-C(6)-H(6)   |   | 120.2    | C(15)-C(16)-C(17)   | 119.3(9)  | H(20E)-C(20B)-H(20F) |   | 109.5    | C(21)-O(7)-P(1)     | 122.7(4)  |
| C(5)-C(6)-H(6)   |   | 120.2    | C(15)-C(16)-H(16)   | 120.4     | C(21)-C(22)-H(22A)   |   | 109.5    | O(5)-P(1)-O(7)      | 113.6(2)  |
| C(6)-C(7)-C(8)   | 5 | 120.9(5) | C(17)-C(16)-H(16)   | 120.3     | C(21)-C(22)-H(22B)   |   | 109.4    | O(5)-P(1)-O(6)      | 115.7(2)  |
| C(6)-C(7)-Br(1)  | 4 | 120.5(4) | C(12)-C(17)-C(16)   | 120.0(10) | H(22A)-C(22)-H(22B)  |   | 109.5    | O(7)-P(1)-O(6)      | 102.6(2)  |
| C(8)-C(7)-Br(1)  | 4 | 118.6(4) | C(12)-C(17)-H(17)   | 120       | C(21)-C(22)-H(22C)   |   | 109.5    | O(5)-P(1)-C(3)      | 112.98(1) |
| C(7)-C(8)-C(9)   | 5 | 119.5(5) | C(16)-C(17)-H(17)   | 120       | H(22A)-C(22)-H(22C)  |   | 109.5    | O(7)-P(1)-C(3)      | 109.02(1) |
| C(7)-C(8)-H(8)   |   | 120.3    | O(3)-C(18)-O(4)     | 124.4(5)  | H(22B)-C(22)-H(22C)  |   | 109.5    | O(6)-P(1)-C(3)      | 101.87(1) |

**Table 4:** Anisotropic displacement parameters ( $\text{\AA}^2 \times 10^3$ ) The anisotropic displacement factor exponent takes the form:  $-2 \pi^2 [h^2 a^{*2} U_{11} + \dots + 2 h k a^* b^* U_{12}]$

|        | U11     | U22     | U33     | U23   | U13     | U12     |        |
|--------|---------|---------|---------|-------|---------|---------|--------|
| C(1)   | 44(2)   | 62(2)   | 71(2)   | 3(2)  | 0(1)    | 1(1)    |        |
| C(2)   | 54(2)   | 64(2)   | 68(2)   | -5(2) | 5(2)    | -2(1)   |        |
| C(3)   | 50(2)   | 56(2)   | 59(2)   | 3(1)  | -2(1)   | -2(1)   |        |
| C(4)   | 45(2)   | 74(2)   | 68(2)   | 1(2)  | -4(1)   | 2(2)    |        |
| C(5)   | 49(2)   | 116(4)  | 69(2)   | 7(2)  | 0(2)    | -4(2)   |        |
| C(6)   | 67(2)   | 132(5)  | 67(2)   | -6(3) | -2(2)   | 8(3)    |        |
| C(7)   | 62(2)   | 108(4)  | 87(3)   | -     | 18(3)   | -12(2)  | 4(2)   |
| C(8)   | 51(2)   | 109(4)  | 102(3)  | -     | 28(3)   | -1(2)   | -12(2) |
| C(9)   | 48(2)   | 91(3)   | 83(3)   | -     | 11(2)   | 5(2)    | -4(2)  |
| C(10)  | 47(2)   | 60(2)   | 60(2)   | 2(1)  | -1(1)   | -5(1)   |        |
| C(11)  | 117(4)  | 77(3)   | 113(4)  | -     | 24(3)   | 56(4)   | -24(3) |
| C(12)  | 98(4)   | 78(3)   | 93(3)   | -     | 25(3)   | 32(3)   | -21(3) |
| C(13)  | 139(6)  | 94(4)   | 144(7)  | -     | 13(4)   | -30(5)  | -25(4) |
| C(14)  | 171(10) | 85(5)   | 199(11) | -     | 12(6)   | -32(9)  | -8(5)  |
| C(15)  | 132(6)  | 106(5)  | 156(8)  | -     | 57(6)   | 36(6)   | -30(5) |
| C(16)  | 151(8)  | 157(9)  | 112(5)  | -     | 68(6)   | 27(6)   | -53(7) |
| C(17)  | 158(7)  | 119(5)  | 91(4)   | -     | 23(4)   | 19(5)   | -30(5) |
| C(18)  | 62(2)   | 66(2)   | 100(3)  | 12(2) | -12(2)  | 5(2)    |        |
| C(19A) | 167(17) | 54(6)   | 138(16) | 2(9)  | -19(12) | -3(8)   |        |
| C(20A) | 320(40) | 78(8)   | 200(30) | -     | 36(12)  | 50(30)  | 12(14) |
| C(19B) | 101(15) | 86(16)  | 120(20) | 0(16) | -18(14) | 15(11)  |        |
| C(20B) | 160(20) | 78(11)  | 130(20) | -     | 12(11)  | -39(16) | 33(12) |
| C(22)  | 225(16) | 140(9)  | 450(30) | -     | 98(15)  | 200(20) | 99(11) |
| C(21)  | 113(5)  | 86(4)   | 131(6)  | 20(4) | 30(4)   | -6(3)   |        |
| C(23)  | 108(5)  | 139(6)  | 128(6)  | -     | 50(5)   | -34(5)  | 5(5)   |
| C(24)  | 167(10) | 234(14) | 130(7)  | -     | 95(9)   | -21(7)  | 17(10) |

|       |        |        |        |            |        |        |
|-------|--------|--------|--------|------------|--------|--------|
| Br(1) | 95(1)  | 151(1) | 109(1) | -<br>47(1) | -23(1) | 0(1)   |
| N(1)  | 54(1)  | 54(2)  | 60(1)  | 5(1)       | 5(1)   | -2(1)  |
| O(1)  | 60(1)  | 69(2)  | 76(2)  | 7(1)       | 11(1)  | -8(1)  |
| O(2)  | 75(2)  | 60(1)  | 73(2)  | -9(1)      | 20(1)  | -10(1) |
| O(3)  | 121(3) | 82(2)  | 112(3) | 37(2)      | -12(3) | -1(2)  |
| O(4)  | 93(2)  | 59(2)  | 135(3) | -5(2)      | 8(2)   | 2(2)   |
| O(5)  | 64(2)  | 69(2)  | 94(2)  | 0(2)       | -22(2) | 10(1)  |
| O(6)  | 81(2)  | 96(2)  | 85(2)  | -<br>26(2) | -18(2) | 2(2)   |
| O(7)  | 59(2)  | 60(2)  | 112(2) | 10(2)      | -3(2)  | -7(1)  |
| P(1)  | 54(1)  | 58(1)  | 75(1)  | 0(1)       | -12(1) | 1(1)   |

**Table 5:** Torsion angles (°)

|                      |          |                             |          |                              |            |
|----------------------|----------|-----------------------------|----------|------------------------------|------------|
| C(18)-C(1)-C(2)-C(3) | 106.5(4) | C(5)-C(4)-C(9)-C(8)         | -2.0(8)  | N(1)-C(10)-O(2)-C(11)        | 177.5(5)   |
| C(4)-C(1)-C(2)-C(3)  | 105.2(4) | C(1)-C(4)-C(9)-C(8)         | 178.6(5) | C(12)-C(11)-O(2)-C(10)       | 172.0(5)   |
| C(1)-C(2)-C(3)-N(1)  | 106.0(4) | C(7)-C(8)-C(9)-C(4)         | -0.8(9)  | O(3)-C(18)-O(4)-<br>C(19B)   | 17(2)      |
| C(1)-C(2)-C(3)-P(1)  | 113.7(3) | O(2)-C(11)-C(12)-C(17)      | 105.1(8) | C(1)-C(18)-O(4)-<br>C(19B)   | -163(2)    |
| C(2)-C(1)-C(3)-N(1)  | 104.3(4) | O(2)-C(11)-C(12)-C(13)      | 76.2(9)  | O(3)-C(18)-O(4)-<br>C(19A)   | 1.1(14)    |
| C(18)-C(1)-C(3)-N(1) | 146.1(4) | C(17)-C(12)-C(13)-<br>C(14) | -0.8(14) | C(1)-C(18)-O(4)-<br>C(19A)   | -178.9(12) |
| C(4)-C(1)-C(3)-N(1)  | 5.1(5)   | C(11)-C(12)-C(13)-<br>C(14) | 178.0(9) | C(20B)-C(19B)-O(4)-<br>C(18) | -93(3)     |
| C(18)-C(1)-C(3)-C(2) | 109.6(5) | C(12)-C(13)-C(14)-<br>C(15) | 0.6(19)  | C(20A)-C(19A)-O(4)-<br>C(18) | -176(2)    |
| C(4)-C(1)-C(3)-C(2)  | 109.4(4) | C(13)-C(14)-C(15)-<br>C(16) | -0.1(19) | C(24)-C(23)-O(6)-P(1)        | -177.3(9)  |
| C(2)-C(1)-C(3)-P(1)  | 106.8(3) | C(14)-C(15)-C(16)-<br>C(17) | -0.1(17) | C(22)-C(21)-O(7)-P(1)        | 116.3(12)  |
| C(18)-C(1)-C(3)-P(1) | -2.8(5)  | C(13)-C(12)-C(17)-<br>C(16) | 0.6(13)  | C(21)-O(7)-P(1)-O(5)         | -32.8(6)   |
| C(4)-C(1)-C(3)-P(1)  | 143.8(3) | C(11)-C(12)-C(17)-<br>C(16) | 178.1(7) | C(21)-O(7)-P(1)-O(6)         | -158.4(5)  |
| C(2)-C(1)-C(4)-C(9)  | -33.8(6) | C(15)-C(16)-C(17)-<br>C(12) | -0.2(15) | C(21)-O(7)-P(1)-C(3)         | 94.1(5)    |
| C(18)-C(1)-C(4)-C(9) | 116.2(5) | C(2)-C(1)-C(18)-O(3)        | 175.7(5) | C(23)-O(6)-P(1)-O(5)         | -42.5(7)   |
| C(3)-C(1)-C(4)-C(9)  | 101.2(5) | C(4)-C(1)-C(18)-O(3)        | 34.4(7)  | C(23)-O(6)-P(1)-O(7)         | 81.7(7)    |
| C(2)-C(1)-C(4)-C(5)  | 146.8(4) | C(3)-C(1)-C(18)-O(3)        | 107.7(6) | C(23)-O(6)-P(1)-C(3)         | -165.4(6)  |
| C(18)-C(1)-C(4)-C(5) | -63.2(5) | C(2)-C(1)-C(18)-O(4)        | 4.2(5)   | N(1)-C(3)-P(1)-O(5)          | 3.5(3)     |
| C(3)-C(1)-C(4)-C(5)  | 79.4(5)  | C(4)-C(1)-C(18)-O(4)        | 145.6(4) | C(2)-C(3)-P(1)-O(5)          | -137.2(3)  |
| C(9)-C(4)-C(5)-C(6)  | 2.6(8)   | C(3)-C(1)-C(18)-O(4)        | 72.3(5)  | C(1)-C(3)-P(1)-O(5)          | 153.1(3)   |
| C(1)-C(4)-C(5)-C(6)  | 178.0(5) | O(1)-C(10)-N(1)-C(3)        | -8.7(6)  | N(1)-C(3)-P(1)-O(7)          | -123.7(3)  |
| C(4)-C(5)-C(6)-C(7)  | -0.5(9)  | O(2)-C(10)-N(1)-C(3)        | 173.0(3) | C(2)-C(3)-P(1)-O(7)          | 95.5(3)    |
| C(5)-C(6)-C(7)-C(8)  | -2.4(10) | C(2)-C(3)-N(1)-C(10)        | 149.1(3) | C(1)-C(3)-P(1)-O(7)          | 25.8(4)    |
| C(5)-C(6)-C(7)-Br(1) | 177.6(5) | C(1)-C(3)-N(1)-C(10)        | -84.1(4) | N(1)-C(3)-P(1)-O(6)          | 128.3(3)   |
| C(6)-C(7)-C(8)-C(9)  | 3.0(10)  | P(1)-C(3)-N(1)-C(10)        | 68.1(4)  | C(2)-C(3)-P(1)-O(6)          | -12.4(4)   |
| Br(1)-C(7)-C(8)-C(9) | 176.9(5) | O(1)-C(10)-O(2)-C(11)       | -0.8(7)  | C(1)-C(3)-P(1)-O(6)          | -82.2(4)   |

**Table 6:** Calculated reflections from PowderCell\*

| h | k | l | 2 $\theta$ /° | d/Å   | I/rel. | F(hkl) | h | k | l | 2 $\theta$ /° | d/Å  | I/rel. | F(hkl) |
|---|---|---|---------------|-------|--------|--------|---|---|---|---------------|------|--------|--------|
| 0 | 1 | 1 | 7.45          | 11.85 | 100.00 | 124.05 | 2 | 0 | 2 | 21.96         | 4.04 | 11.05  | 123.71 |
| 0 | 0 | 2 | 7.99          | 11.06 | 6.05   | 46.23  | 0 | 3 | 3 | 22.49         | 3.95 | 12.15  | 132.99 |
| 0 | 1 | 2 | 10.17         | 8.69  | 9.81   | 53.15  | 1 | 0 | 5 | 22.53         | 3.94 | 4.04   | 76.84  |
| 1 | 1 | 0 | 11.97         | 7.39  | 16.66  | 81.60  | 2 | 1 | 2 | 22.87         | 3.89 | 36.62  | 166.13 |
| 1 | 1 | 1 | 12.62         | 7.01  | 27.72  | 78.55  | 1 | 2 | 4 | 22.87         | 3.89 | 32.65  | 156.91 |
| 1 | 0 | 2 | 12.94         | 6.83  | 24.40  | 106.94 | 0 | 2 | 5 | 23.75         | 3.74 | 3.27   | 73.08  |
| 0 | 2 | 2 | 14.94         | 5.92  | 29.86  | 136.85 | 2 | 2 | 0 | 24.07         | 3.69 | 2.17   | 60.39  |
| 1 | 0 | 3 | 15.75         | 5.62  | 33.38  | 152.68 | 2 | 2 | 1 | 24.41         | 3.64 | 4.38   | 61.52  |
| 1 | 2 | 0 | 16.22         | 5.46  | 23.67  | 132.56 | 2 | 1 | 3 | 24.59         | 3.62 | 6.49   | 75.50  |
| 1 | 2 | 1 | 16.71         | 5.30  | 20.44  | 89.80  | 1 | 3 | 3 | 24.74         | 3.60 | 7.55   | 81.94  |
| 1 | 1 | 3 | 16.97         | 5.22  | 70.80  | 169.77 | 0 | 1 | 6 | 24.95         | 3.57 | 2.91   | 72.53  |
| 0 | 1 | 4 | 17.22         | 5.15  | 16.09  | 116.14 | 2 | 2 | 2 | 25.40         | 3.50 | 3.73   | 59.18  |
| 0 | 2 | 3 | 17.43         | 5.08  | 4.33   | 61.04  | 1 | 0 | 6 | 26.23         | 3.39 | 6.50   | 114.31 |
| 1 | 2 | 2 | 18.11         | 4.90  | 3.39   | 39.68  | 1 | 3 | 4 | 26.97         | 3.30 | 3.68   | 62.63  |
| 1 | 1 | 4 | 20.04         | 4.43  | 3.17   | 42.60  | 2 | 2 | 3 | 26.97         | 3.30 | 5.04   | 73.34  |
| 1 | 2 | 3 | 20.22         | 4.39  | 29.91  | 132.15 | 0 | 3 | 5 | 27.73         | 3.21 | 3.12   | 83.95  |
| 2 | 0 | 0 | 20.42         | 4.34  | 8.88   | 145.53 | 2 | 3 | 0 | 28.01         | 3.18 | 2.48   | 75.70  |
| 0 | 2 | 4 | 20.43         | 4.34  | 6.46   | 87.78  | 0 | 4 | 3 | 28.15         | 3.17 | 5.09   | 109.03 |
| 0 | 3 | 2 | 20.60         | 4.31  | 2.83   | 58.64  | 2 | 3 | 1 | 28.30         | 3.15 | 11.03  | 114.15 |
| 2 | 0 | 1 | 20.82         | 4.26  | 5.10   | 79.49  | 1 | 4 | 2 | 28.58         | 3.12 | 12.03  | 120.48 |
| 0 | 1 | 5 | 21.03         | 4.22  | 2.16   | 52.28  | 0 | 1 | 7 | 28.93         | 3.08 | 4.03   | 99.87  |
| 1 | 3 | 0 | 21.56         | 4.12  | 12.43  | 128.74 | 2 | 2 | 4 | 29.05         | 3.07 | 6.15   | 87.60  |
| 2 | 1 | 1 | 21.77         | 4.08  | 10.74  | 85.48  | 1 | 2 | 6 | 29.20         | 3.06 | 2.49   | 56.09  |
| 1 | 3 | 1 | 21.93         | 4.05  | 13.19  | 95.47  | 2 | 1 | 5 | 29.48         | 3.03 | 7.64   | 99.25  |

Source: Cu-K $\alpha_1$  ( $\lambda = 1.540598 \text{ \AA}$ )

Condition on reflections:  $I \geq 2$

Range (2 $\theta$ ): From 3° to 30°

\*PowderCell for Windows (version 2.4) by Kraus W. & Nolze G., Federal institute for materials Research and testing, Rudower Chausse 5, 12489 Berlin Germany.

## 11. References

- 1) T. Rossolini, J. A. Leitch, R. Grainger, D. J. Dixon *Org. Lett.* **2018**, *20*, 6794–6798.
- 2) Y. Haegawa, T. Cantin, J. Decaens, S. Couve-Bonnaire, A. B. Charette, T. Poisson, P. Jubault *Chem. Eur. J.* **2022**, e202201438.
- 4) Y. Takei, A. Murata, K. Yamagishi, S. Arai, H. Nakamura, T. Inoue, S. Takeoka *Chem. Commun.* **2013**, *49*, 7313-7315.
- 5) S. Yu, R. Hua, X. Fu, G. Liu, D. Zhang, S. Jia, H. Qiu, W. Hu *Org. Lett.* **2019**, *21*, 5737-5741.
- 6) W. Li, L. Zhou *Org. Lett.* **2022**, *24*, 3976-3981
- 7) O. Pavlyuk, H. Teller, M. C. McMills *Tetrahedron Lett.* **2009**, *50*, 2716-2718.
- 8) C. Qin, H. M. L. Davies, *J. Am. Chem. Soc.* **2013**, *135*, 14516–14519.
- 9) W. Wu, Z. Lin, P. Chen, J. Li, H. Jiang, *J. Org. Chem.* **2017**, *82*, 12746-12756.
